# Supplementary material for: Pan-cancer subtyping in a 2D-map shows substructures that are driven by specific combinations of molecular characteristics
Source: PubMed Central journal article supplement (PMC4842960; doi:10.1038/srep24949), 2016-04-25
Supplement: srep24949-s1.pdf [file srep24949-s1.pdf]

## Supplementary materials

### Pan-cancer subtyping in a 2D-map shows substructures that are driven by specific combinations of molecular characteristics

Erdogan Taskesen<sup>1</sup>, Sjoerd M.H. Huisman<sup>1,2</sup>, Ahmed Mahfouz<sup>1,2</sup>, Jesse H Krijthe<sup>1</sup>, Jeroen de Ridder<sup>1</sup>, Anja van de Stolpe<sup>3</sup>, Erik van den Akker<sup>1</sup>, Wim Verheagh<sup>3</sup>, Marcel J.T. Reinders<sup>1\*</sup>

#### Affiliations:

<sup>1</sup> Delft Bioinformatics Lab (DBL), Delft University of Technology, Delft, 2628CD, the Netherlands

<sup>2</sup> Division of Image Processing, Department of Radiology, Leiden University Medical Center, Leiden, the Netherlands

<sup>3</sup> Precision and decentralized Diagnostics, Philips Research, Eindhoven, the Netherlands

ET: E.Taskesen@vu.nl; SH: S.M.H.Huisman@tudelft.nl; AM: A.Mahfouz@tudelft.nl; JHK: J.H.Krijthe@tudelft.nl; JDR: J.deRidder@tudelft.nl; AVDS: anja.van.de.stolpe@philips.com; EVDA: E.B.vandenAkker@tudelft.nl; WV: wim.verhaegh@philips.com; MJTR: M.J.T.Reinders@tudelft.nl

\* Corresponding author

## MERDITH method

Our proposed method (Fig.1) contains seven principal steps specifically tailored to exploit rich datasets in which samples have been characterized using genome wide measurements. As an input we used four independent genome wide measurements from TCGA. In step 1 we further normalized the level 3 data per data set to zero mean, with additional data specific adjustments as outlined in the methods section. Step 2: Gene mapping: For GE, ME, and CN we mapped features to the accompanying genes as described in methods section. Step 3: Feature extraction: We use canonical principal component analysis (PCA) for an initial dimensionality reduction which is performed per data set and selected are the top 50 principal components (PCs) with highest eigenvalues (explained variance for GE, ME, CN and MIR is 74%, 66%, 73%, and 89% respectively). These contributions per data set are scaled in step 4 on the total variance of each of their respective set of 50 PCs to ensure that the final integrated results are not dominated by a single data set, e.g.,  $PC_{normalized}^i = \frac{\text{var}(PC^i)}{\sqrt{\sum \text{var}(PC^i)}}$  where  $i$  iterates over the 50 principal components. Step 5: Concatenation: The obtained feature space is a summarized into 200 PCs x 4,434 samples and further reduced using a non-linear dimensionality reduction method, called t-SNE<sup>1</sup>, that emphasizes the local similarity between samples. Note that the PCs that cover the 95% explained variance per data set shows similar results (Fig.S1). The t-SNE approach showed to be superior to other feature extraction techniques in the creating of a low-dimensional map based on high-dimensional data<sup>1</sup>, which we therefore employed in our approach. All cancer samples can now be projected in a two-dimensional space (step 6), and allows cluster analysis, omic contribution analysis, and corresponding patient survival analysis as depicted in step 7 (Fig.1A).

### PCA projections of all cancer-tissues

The use of Principal Component Analysis (PCA) has proven to be a very valuable technique for feature extraction and visualization in genomic research. PCA aims to capture features with largest variance but it lacks in performance for finding local structure in high-dimensional genomic data, when reducing the data to a low (visible) feature space (e.g., 2D or 3D). A disadvantage of PCA is that it preserves the structure in the data by keeping the low-dimensional representations of dissimilar data points far apart. For high-dimensional genomic data, it is important to keep the low-dimensional representations of very similar data points close together, which is typically not possible with a linear mapping approach. Here we systematically evaluate the projections produced by PCA and t-SNE. In general, inspection of the two principal components with highest eigenvalue, based on the integrated data, revealed poor separation between the cancerous tissues (Supplementary Fig.S3C). A cluster analysis grouped all patient samples into two clusters, after following a similar optimization approach as for the t-SNE map. Thus PCA failed

to produce a clear visualization of the complex genomic behavior for the 19 cancerous tissues that the t-SNE mappings offered.

### Single data-type analysis versus MO-map

In this section we addressed the question whether the separation/subtyping of cancer-tissue samples using a multi-omic approach is superior compared to that of a single omic analysis. We show the results using three different methods in which we address differences at local and global scales.

First, we addressed the question whether the average t-SNE distance of patients within tissue-of-origin clusters (in Euclidian distance), is significantly smaller compared to the average t-SNE distance of randomly chosen cancer-tissue samples with the same group size (based on 10,000 draw). This quantifies the separation of a cancer-tissue cluster in relation to all cancer-tissue types. For the multi-omic approach (Fig.2A) we already demonstrated significant separation of the cancer-tissue sample clusters ( $P < 1 \times 10^{-4}$ , Supplementary Fig.S4). For the single omic data sets we first projected the cancer samples in a two-dimensional map by using MEREDITH. The resulting 2D-maps (Supplementary Fig.S10-Fig.S13) also produced a significantly smaller t-SNE distance for patients within a tissue-of-origin cluster compared to the average t-SNE distance of randomly chosen samples with the same group size ( $P < 1 \times 10^{-4}$ , Supplementary Fig.S10-Fig.S13). For gene expression data it was previously shown that the use of solely RNA-sequencing data can accurately discriminate various cancer-tissue types in a one versus all supervised approach<sup>2</sup>. We now also demonstrate that genome wide profiles of DNA-methylation, copy-number changes and microRNAs can distinguish between cancer-types.

Finally, we quantified the similarity of the  $k_x$  nearest neighboring sample(s) in the MO-map with that of the  $k_y$  nearest neighboring sample(s) in the single omic maps. Thus if a single omic map has perfect local similarity with the MO-map, the  $k_x$  nearest neighboring sample(s) would fully overlap with  $k_y$ , and consequently have the value one. We compared the MO-map to the maps of the four genome wide data sets for the combinations of  $k_x$  and  $k_y$ , up to 250 nearest neighbors. As expected, increasing the number of neighbors resulted in higher similarity with the MO-map (Supplementary Fig.S18). This indicates that on a global level (high  $k_{xy}$ ), cancer-tissue samples are consistently grouped together. Differences however are seen on the local scales (low  $k_{xy}$ , Supplementary Fig.S18), which indicates differences in local patient sample orientation (patients have different neighbors across the omic data sets). In general, we detected that the GE map showed highest local similarity with the MP map (77%, Supplementary Fig.S18) when looking at the 250 nearest neighbors (followed by the ME map (74%), MIR map (69%) and finally the CN map (50%, Supplementary Fig.S18).

Taken together, we demonstrate that cancer-tissues are separable by means of genome wide data from each of the four data sets. The MO-approach improved retention of cancer samples in the tissue-of-origin cluster compared to single omic analysis. In terms of subtyping, global patterns of cancer-tissue grouping are comparable between the MO-approach and single omic approach. However, the main differences occur on the local scale, indicating that cancer samples in the MO-approach have different neighbors compared to that of single omic analysis.

### **DNA-methylation revealed gender specific grouping within tissue-of-origin, whereas Copy Number variation grouped genders across tissue-of-origin**

Out of the 19 cancerous tissues, there are 16 tissues with mixed genders, and three gender specific tissues, i.e., CESC, OV are female specific, and PRAD is male specific. For DNA-methylation and Copy Number changes, a gender specific grouping is a known effect, e.g., males do have a tendency toward higher methylation levels<sup>3</sup>. However, we detected a striking difference between ME (Supplementary Fig.S14) and CN (Supplementary Fig.S15) in a pan-cancer analysis; i.e., ME groups genders within-tissue-of-origin whereas CN groups genders across-tissue-of-origin. Nevertheless, for ME there is one exception, we observed gender specific grouping of squamous-like-type cancerous tissues cluster together, i.e., female PAAD patients cluster together with female patients from CESC (Cluster 5), whereas male patients with PAAD cluster together with male patients from HNSC and BLCA (Cluster 3).

We next analysed associations with gender specific clustering per cancer-type. In order to do so, we performed t-SNE followed by DBSCAN per cancer-type. Each cluster is subsequently assessed for associations with gender using the hypergeometric test. Note that the clusters are determined by the silhouette score and therefore not forced into two clusters (representing males and females). For DLBC, PAAD and READ we could not test for gender specific associations due low sample sizes.

For ME, we detected that 11 cancer-types (out of 13 tested) showed significant grouping of gender, meaning that at least two clusters are detected with one enriched for males and one for females. ACC ( $P=0.0344$ ), LUAD ( $P=2.09e-67$ ), LGG ( $P=3.8e-48$ ), LAML ( $P=2.28e-35$ ), KIRP ( $P=7.5e-06$ ), KIRC ( $P=2.34e-16$ ), COAD ( $P=5.8e-10$ ), HNSC ( $P=7.8e-53$ ), LIHC, ( $P=2.3e-07$ ), LUSC ( $P=6.7e-15$ ), BLCA ( $P=2.1e-12$ ). Note that the presented P-value is the minimum of the gender associated clusters. Only the detected clusters with kidney Chromophobe (KICH) and breast cancer (BRCA) patient samples are not significantly associated with the grouping of males and females separately. The four cancer-types KIRC, KIRP, LIHC, and LUSC showed multiple significant gender specific clusters. This demonstrates that genders keep clustering together but can be separated based on other DNA-methylation characteristics.

For CN, we also detected 11 cancer-types (out of 13 tested) with significant enrichment for genders; ACC ( $P=0.0365$ ), LUAD ( $P= 4.9532e-89$ ), LGG ( $P= 7.9815e-37$ ), LAML ( $P= 2.3867e-43$ ), KIRP ( $P= 3.3382e-12$ ), KIRC ( $P= 6.7780e-39$ ), COAD ( $P= 1.0700e-18$ ), HNSC ( $P= 6.7541e-62$ ), LIHC, ( $P= 1.5367e-15$ ), LUSC ( $P= 4.3421e-16$ ), and BLCA ( $P= 6.9973e-18$ ). Similar to the DNA-methylation results, only BRCA and KICH showed no separate clusters that were significantly associated with males/females. Interestingly, four cancer-types, COAD, BLCA, LUAD, and LGG showed multiple significantly gender specific clusters. Note that these are four different cancer-types from those detected based on the ME data set.

For microRNA data we detected one cancer-type (HNSC,  $P= 0.0162$ ) with both significant male and female associations to the determined clusters, whereas the gene expression data showed no gender specific associations in the clusters. We finally analyzed the cancer-types based on the integrated omic data sets and detected that Neck squamous cell carcinoma (HNSC,  $P=0.0229$ ), and Lung adenocarcinoma (LUAD,  $P=9.8374e-04$ ) were significantly associated with male and female clusters. With these analyses we demonstrate that gender specific grouping for the ME and CN omic data set does dominate the clustering of patient samples when analyzing each of cancer-types separately. There were only two exception BRCA and KICH showed no grouping of males and females in the detected clusters.

### **Barnes Hut t-SNE**

The Barnes Hut t-Distributed Stochastic Neighbor Embedding (t-SNE) algorithm<sup>4</sup> is a computationally efficient variant of the original t-SNE algorithm<sup>1</sup>. The Barnes Hut t-SNE algorithm embeds the high-dimensional data (in our approach the 200 PCs) into a two-dimensional map, and preserves the local structure by using a probabilistic measurement. This means that it finds an arrangement of neighbour patient samples in the low-dimensional space which is representative to that of the high-dimensional space. Moreover, t-SNE convert the distance between two samples in the high-dimensional space into a conditional probability, and subsequently applies a cost function that preserves the computed probabilities in the low-dimensional space. Patient-samples with similar genomic profile will therefore be positioned close together in the map which reflects the proximity in the high-dimensional space, whereas uncorrelated genomic profiles will be distant in the high-dimensional space and will thus also be far apart in the t-SNE map. The perplexity, which is a measure of the effective number of neighbors used to embed each data point, is set on default (i.e., 30) for all mapping that are performed. We used t-SNE to produce 2D projections of the data using Euclidean measures for the distance between data points in the sample space.

### **Comparison of omic data sets by means of Receiver Operating Curve**

To obtain a measure of how well samples of the same cancer-type cluster together in the 2D t-SNE maps, we devised a classification scheme. For each pair of samples, we predicted whether they belong to the same cancer-type, based on their pairwise distance. The sample pairs were ordered by distance in the 2D t-SNE map and an ROC curve was made by scoring true positives (same cancer-type) and false positives (different cancer-type) over this list of pairs.

### **Quantification of Local similarity across two maps**

The scores defined to compare the similarity between two maps are not symmetric because it is possible that, for instance, the 10 nearest neighbors in map X have more overlap with the 20-nearest neighbors in map Y, than the top-20 of map X with the top-10 in map Y.

## References

- 1 Maaten, L. J. P. v. d. & Hinton, G. E. Visualizing High-Dimensional Data Using t-SNE. *Journal of Machine Learning Research* **9**, 2579-2605 (2008).
- 2 Wei, I. H., Shi, Y., Jiang, H., Kumar-Sinha, C. & Chinnaiyan, A. M. RNA-Seq accurately identifies cancer biomarker signatures to distinguish tissue of origin. *Neoplasia* **16**, 918-927, doi:10.1016/j.neo.2014.09.007 (2014).
- 3 El-Maarri, O. *et al.* Gender specific differences in levels of DNA-methylation at selected loci from human total blood: a tendency toward higher methylation levels in males. *Hum Genet* **122**, 505-514, doi:10.1007/s00439-007-0430-3 (2007).
- 4 Maaten, L. v. d. Barnes-Hut-SNE. *arXiv.org arXiv:1301.3342* (2013 ).

## Figure legends

**Supplementary Fig.S1. Patient-sample projection in a two-dimensional map illustrating the cancer-landscape using the number of principal component that explain the 95% variance.** (a) Projection of the 4,434 patient cancer samples using MEREDITH by using the number of PCs that explain the 95% of the variance within each data set. In total 3,640 PCs are used for which 1,479 are from gene expression, 1,609 from DNA-methylation, 441 from Copy number variations, and 111 from the microRNA data set. Each point is a sample which is colored based on the cancer-type label (19 cancer-types in total). The clustering of cancer samples is illustrated by the 12 differently colored density maps. (b) Heat map depicting the clustering of cancer samples versus cancer-types. A star indicates significant overrepresentation of samples from a specific cancer-type in a cluster, whereas the colored squares depict the percentages of cancer samples in a particular cluster.

**Supplementary Fig.S2. Quantification of Local similarity across two maps.** Schematic overview to systematically compare local and global differences between two sample projections. For illustration we compare two input maps (x and y) in which each map contains n samples (step 1). The second step is the ranking of samples based on Euclidean distance. The ranks of map x are subsequently compared to the ranks of map y for  $k_x$  and  $k_y$  nearest neighbours (step 3). The overlap between ranks (step 4), is subsequently summarized in Score:  $S_{x,y}(k_x, k_y)$ .

**Supplementary Fig.S3. Comparisons with maps from principal component analysis.** (a). PCA projection of the 4,434 patient samples based on the multi-omic data (200D) to 2PCs with highest eigenvalue. The loadings of the PCs are depicted with blue lines. Each patient sample is depicted by a square (male), dot (female), or plus (gender unlabeled), and colored based on one of the 19 cancer-tissues. The density maps are colored according to one of the two cluster labels which are detected as described in Methods section. (b) Comparison of the 2D MO-map using MEREDITH versus 200D PCA map. (c). Comparison of 2D MO-map versus 6D MO-map using MEREDITH. (d) Comparison of the 2D MO-map using MEREDITH versus the 2D PCA map. (e). Comparison of 2D PCA map versus 200D PCA map. All comparison between two maps follow the quantification of local similarity across two maps approach for  $k_{xy}=250$  (the average cancer-tissue group size) as described in Methods section.

**Supplementary Fig.S4. Separability of cancer-tissues based for the MO-map.** The mean distance between samples of a cancer-type is compared to the mean distance between the same numbers of randomly chosen samples (no. of draws is 10,000). The plots show the observed values in red dashed lines and kernel density estimates of the random values in black.



**Supplementary Fig.S5 Comparison of cluster algorithms in high (original) dimensional space and low-dimensional space.** Cluster algorithms are compared in the high (original 200D) dimensional space and in the low-dimensional space. Panel A-C depicts the Davies Bouldin index (DBindex) score, and cluster enrichment with the cancer-types using: **(a)** HC, **(b)** k-means and **(c)** Mixture of Gaussians respectively. DBSCAN was not able to fit the data in the high data space. Panel D-F depicts the DBindex score, and cluster enrichment in the low-dimensional (2D) space by means of: **(d)** HC, **(e)** k-means, and **(f)** Mixture of Gaussians respectively. Panel G-I depicts the DBindex score, and cluster enrichment in the low-dimensional using HC and: **(g)** PCA-2D, **(h)** PCA-3D, and **(i)** PCA-4D. The red vertical line depicts the optimum number of clusters under the restriction that at least 5 and at most 40 clusters can exist.

**Supplementary Fig.S6. Comparison of the MO-map with hundred different initializations.** 100 MO-maps with random initialization for patient samples are derived with MEREDITH. The MO-maps are subsequently compared to the final MO-map (Fig.2A) using the local similarity across two maps approach for  $k_{xy}=20$ . Each point in the map represents the percentage of overlap per sample between the final MO-map and a MO-map with random start initialization. Values range between [0,...,1] depicting no overlap (blue: 0), up to full overlap (red: 1). The average overlap between the final MO-map and each single MO-map with random start initialization ranges between 75.8 and 84.8. Clustering is performed using Euclidian distance and ward linkage. The Red Cluster consists of samples that are consistently detected with low percentage of overlap compared to the MO-map as a consequence of the random initialization.

**Supplementary Fig.S7. Subtyping of Breast Cancer patient samples for GE, ME, CN and MIR data-types separately.** Panel **(a)** to **(d)**: Analysis of 563 Breast cancer samples using GE, ME, MIR and CN datasets using MEREDITH, respectively Each point is a sample (square: male, dot: female, plus: unlabeled gender) colored on the basis of the subtypes of breast cancer.

**Supplementary Fig.S8. Correlation between COP patient samples based on GE, ME, MIR, and CN.** **(a)** Projection of the 64 COP samples using MEREDITH. Each point is a COP sample (square: male, dot: female, plus: unlabeled gender) colored on the basis of the cancer-type label. The colored density maps illustrate the two sub-clusters COP-I and COP-II. **(b)** Pairwise correlations between the 64 COP samples based on each of the four molecular data-types (GE, ME, MIR and CN separately). The cells in the heat map are coloured by Pearson correlations values, depicting higher positive (red) or negative (blue) correlations, as indicated by the scale bar.

**Supplementary Fig.S9. Supervised comparison between single data-type maps and the integrated MO-map.** Supervised comparison between single data-type maps and the integrated MO-map for the

separation of the cancer-tissues by means of the area under the curve (AUC), as follows: For each pair of samples a prediction is made whether they belong to the same cancer-type, based on their pairwise distance. The sample pairs were ordered by distance in the 2D t-SNE map and an ROC curve was made by scoring true positives (same cancer-type) and false positives (different cancer-type) over this list of pairs. Only using the CN dataset (purple line) results in poorest AUC score whereas the MO-map (yellow) results in best AUC score.

**Supplementary Fig.S10. Patient-sample projection for GE data respectively.** (a). Projection of the 4,434 patient samples in 2D for the GE dataset. Each sample (square: male, dot: female, plus: unlabeled gender) is colored on the basis of one of the 19 cancer-tissues. The density map is colored according the cluster label. (b). Separability of cancer-tissues for the GE dataset by computing the average distance of samples for a cancer-tissue compared to the average distance between randomly chosen samples using the same group size (no. of draws is 10,000). The plots demonstrate the observed values in red dashed lines and kernel density estimates of the random values in black.

**Supplementary Fig.S11. Patient-sample projection for ME data respectively.** (a). Projection of the 4,434 patient samples in 2D for the ME dataset. Each sample (square: male, dot: female, plus: unlabeled gender) is colored on the basis of one of the 19 cancer-tissues. The density map is colored according the cluster label. (b). Separability of cancer-tissues for the ME dataset by computing the average distance of samples for a cancer-tissue compared to the average distance between randomly chosen samples using the same group size (no. of draws is 10,000). The plots demonstrate the observed values in red dashed lines and kernel density estimates of the random values in black.

**Supplementary Fig.S12. Patient-sample projection for CN data respectively.** (a). Projection of the 4,434 patient samples in 2D for the CN dataset. Each sample (square: male, dot: female, plus: unlabeled gender) is colored on the basis of one of the 19 cancer-tissues. The density map is colored according the cluster label. (b). Separability of cancer-tissues for the CN dataset by computing the average distance of samples for a cancer-tissue compared to the average distance between randomly chosen samples using the same group size (no. of draws is 10,000). The plots demonstrate the observed values in red dashed lines and kernel density estimates of the random values in black.

**Supplementary Fig.S13. Patient-sample projection for MIR data.** (a). Projection of the 4,434 patient samples in 2D for the MIR dataset. Each sample (square: male, dot: female, plus: unlabeled gender) is colored on the basis of one of the 19 cancer-tissues. The density map is colored according the cluster label. (b). Separability of cancer-tissues for the MIR dataset by computing the average distance of samples for a cancer-tissue compared to the average distance between randomly chosen samples using

the same group size (no. of draws is 10,000). The plots demonstrate the observed values in red dashed lines and kernel density estimates of the random values in black.

**Supplementary Fig.S14. Patient-sample projection of the genome wide DNA-methylation profiles using all chromosomal features.** Projection of the 4,434 patient samples for DNA-methylation profiles without removing features that are located at the X and Y chromosomes. Each point is a sample (square: male, dot: female, plus: unlabeled gender) colored on the basis of the cancer-tissue label (19 cancer-tissues in total). The density map is colored according the cluster label.

**Supplementary Fig.S15. Patient-sample projection of the genome wide Copy Number profiles using all chromosomal features.** Projection of the 4,434 patient samples for copy-number profiles without removing of features that are located at the X and Y chromosomes. Each point is a sample (square: male, dot: female, plus: unlabeled gender) is colored on the basis of the cancer-tissue label (19 cancer-tissues in total). The density map is colored according the cluster label.

**Supplementary Fig.S16. Principal component analysis including all X and Y features.** PCA projection using the 2PCs with highest eigenvalue of the 4,434 patient samples based on the (a) DNA-methylation levels and (b) Copy number changes data without removing of features that are located at the X and Y chromosomes. Each sample (square: male, dot: female, plus: unlabeled gender) is colored on the basis of the sex label. The density map is colored according the cluster label.

**Supplementary Fig.S17. MO-map colored on ethnicity, race, DNA-methylation array and tissue source site.** Projection of the 4,434 patient samples based on the multi-omic approach. Each point is a sample (square: male, dot: female, plus: unlabeled gender) is colored on the basis of (a) Ethnicity, (b). Race, (c). Tissue source site (TSS), (d) DNA-methylation array. The density maps are colored according the cluster label.

**Supplementary Fig.S18. Single omic versus MO-map.** Comparison of MO-map versus maps derived from the four molecular data-types separately for  $k_{xy}=[1..250]$  nearest neighbours. More detail can be found in Methods section (Quantification of Local similarity across two maps), and supplementary material (Single data-type analysis versus MO-map).



Figure S2

Map x

Map y

1.

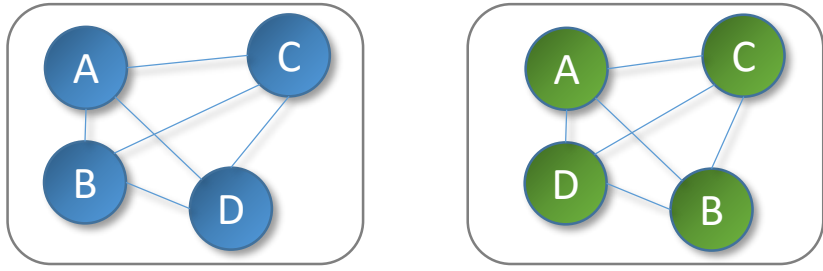

2.

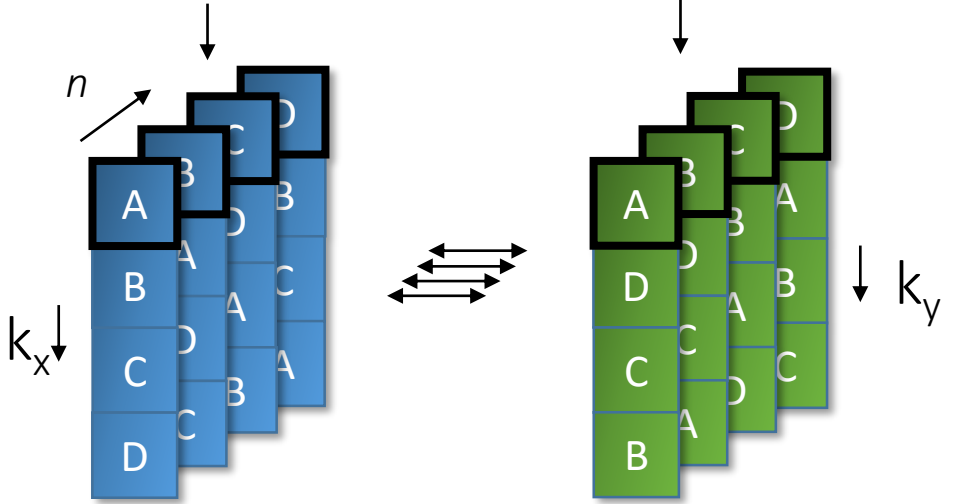

$k_x, k_y=1$     $k_x, k_y=2$     $k_x, k_y=3$     $k_x=2, k_y=1$     $k_x=1, k_y=2$     $k_x=3, k_y=1$     $k_x=3, k_y=2$     $k_x=2, k_y=3$     $k_x=1, k_y=3$

3.

|                          |   |   |    |   |   |   |   |   |   |
|--------------------------|---|---|----|---|---|---|---|---|---|
| A                        | 0 | 1 | 3  | 0 | 0 | 1 | 2 | 2 | 1 |
| B                        | 0 | 1 | 3  | 0 | 1 | 1 | 2 | 2 | 1 |
| C                        | 0 | 1 | 3  | 0 | 0 | 1 | 2 | 2 | 1 |
| D                        | 0 | 1 | 3  | 1 | 0 | 1 | 2 | 2 | 1 |
| sum                      | 0 | 4 | 12 | 1 | 1 | 4 | 8 | 8 | 4 |
| $n \cdot \min(k_x, k_y)$ | 4 | 8 | 12 | 4 | 4 | 4 | 8 | 8 | 4 |

4.

|       |   |     |     |     |       |                     |
|-------|---|-----|-----|-----|-------|---------------------|
|       |   | 3   | 4/4 | 8/8 | 12/12 |                     |
| $k_y$ | 2 | 1/4 | 4/8 | 8/8 |       | $S_{x,y}(k_x, k_y)$ |
|       | 1 | 0   | 1/4 | 4/4 |       |                     |
|       |   | 1   | 2   | 3   | $k_x$ |                     |

Figure S3

a

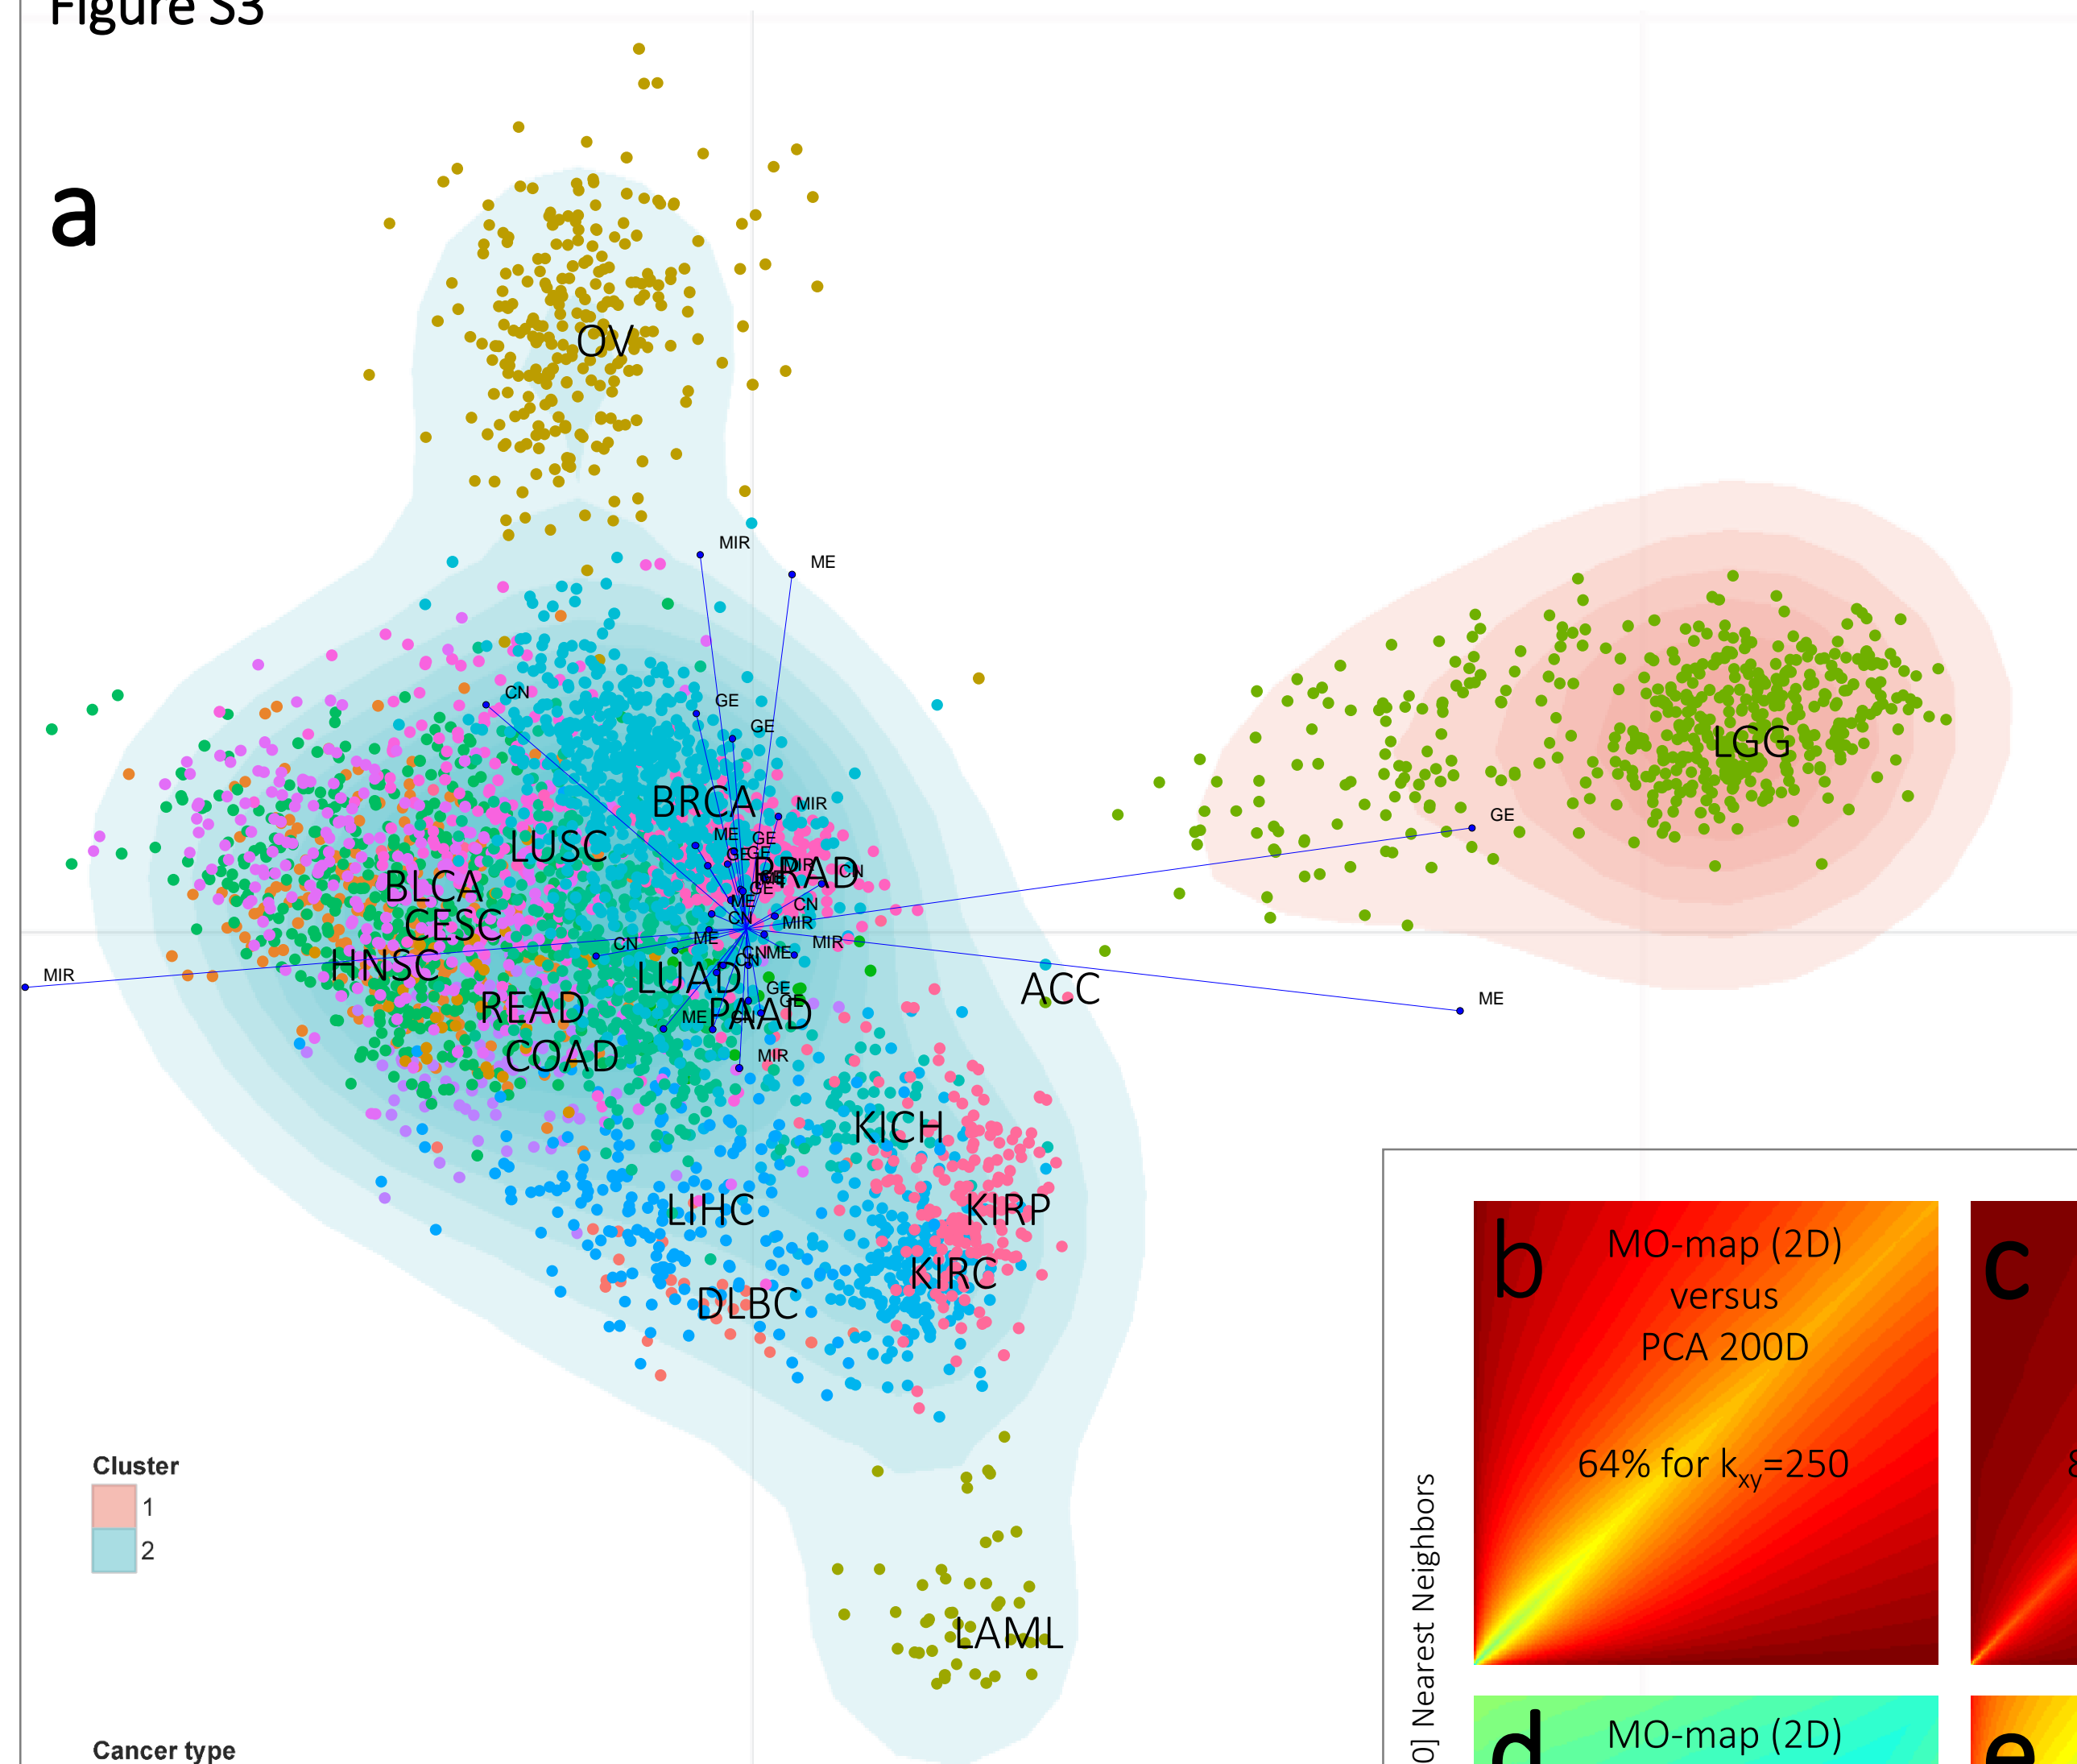

Cluster

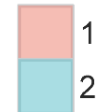

Cancer type

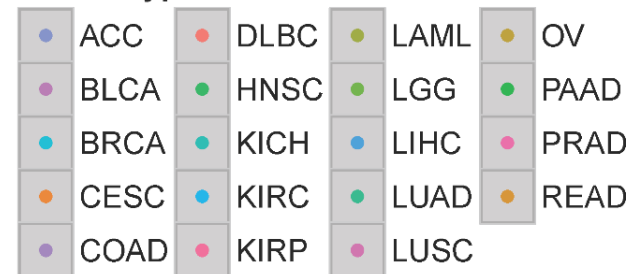

sex

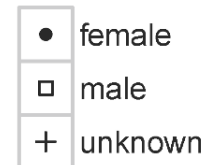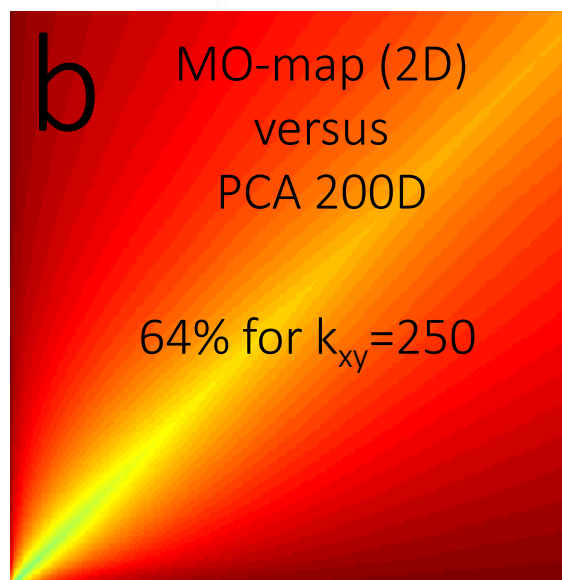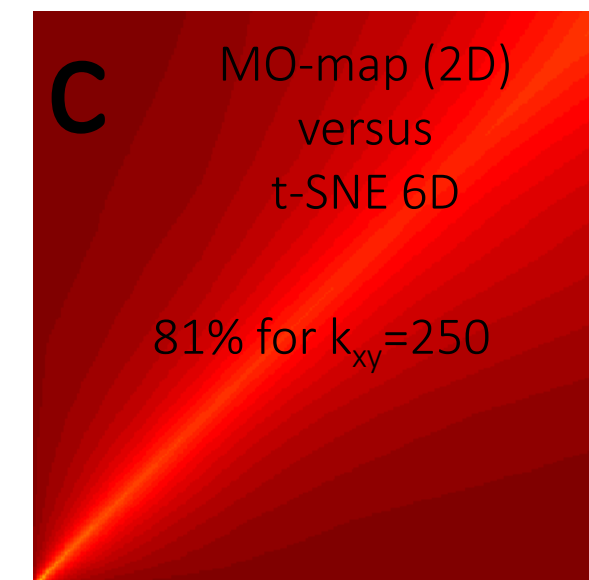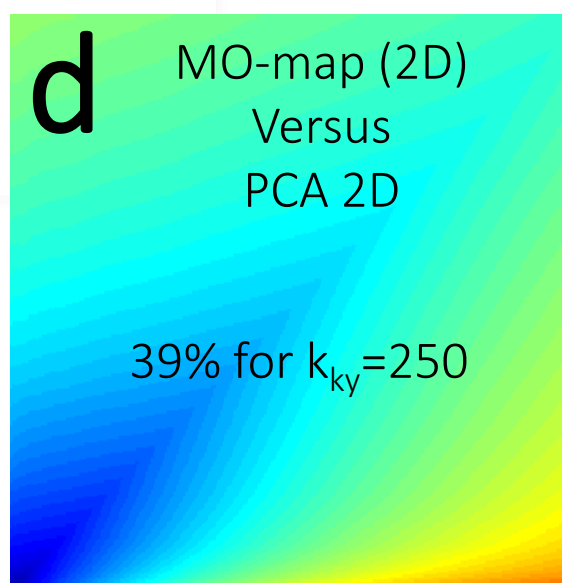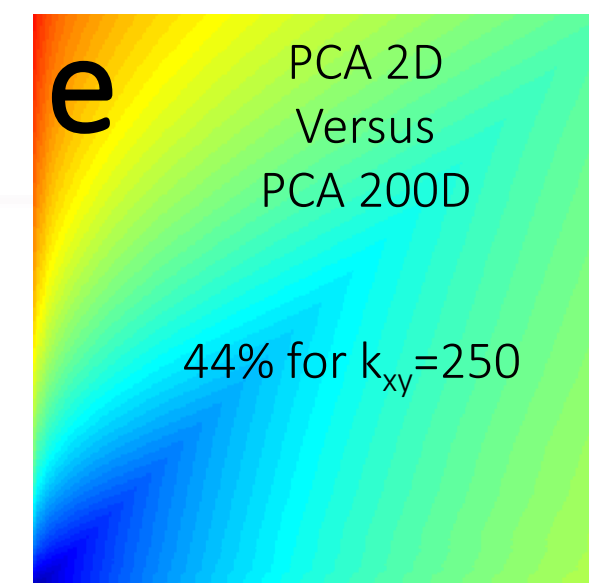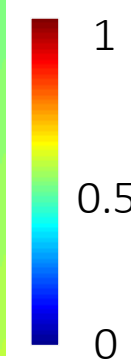

[ $k_y=1..250$ ] Nearest Neighbors

[ $k_x=1..250$ ] Nearest Neighbors

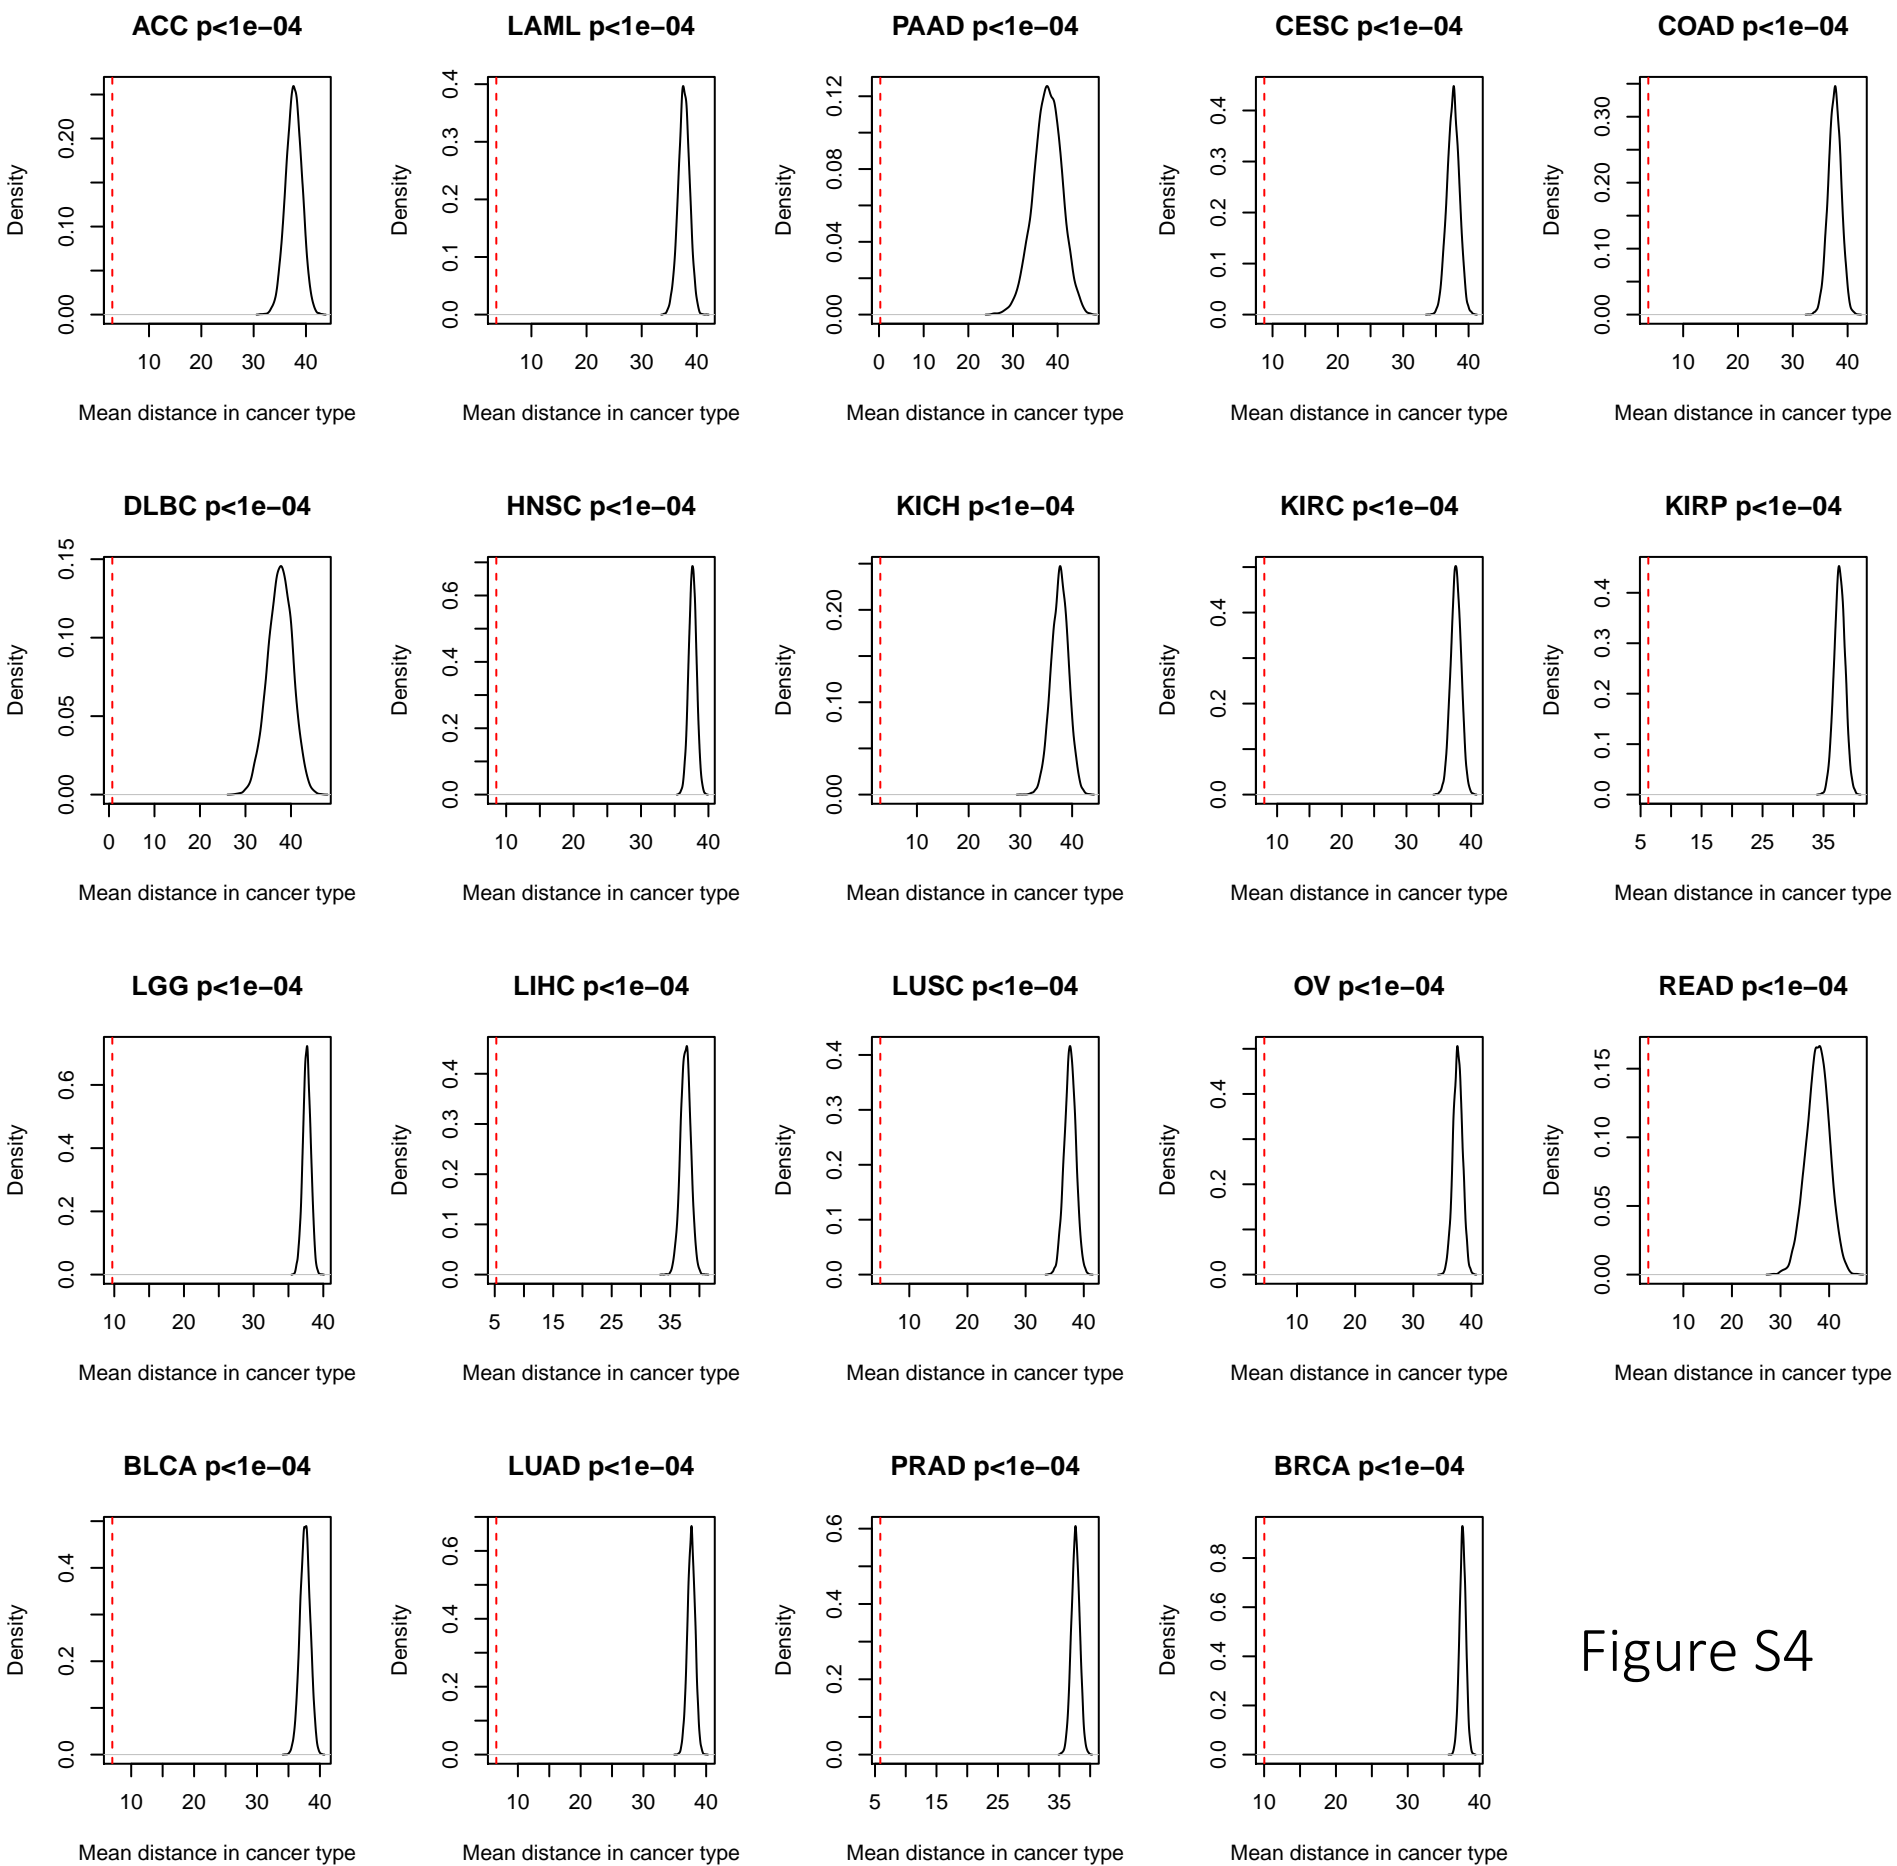

Figure S4

Figure S5

### High Dimensional PCA Space

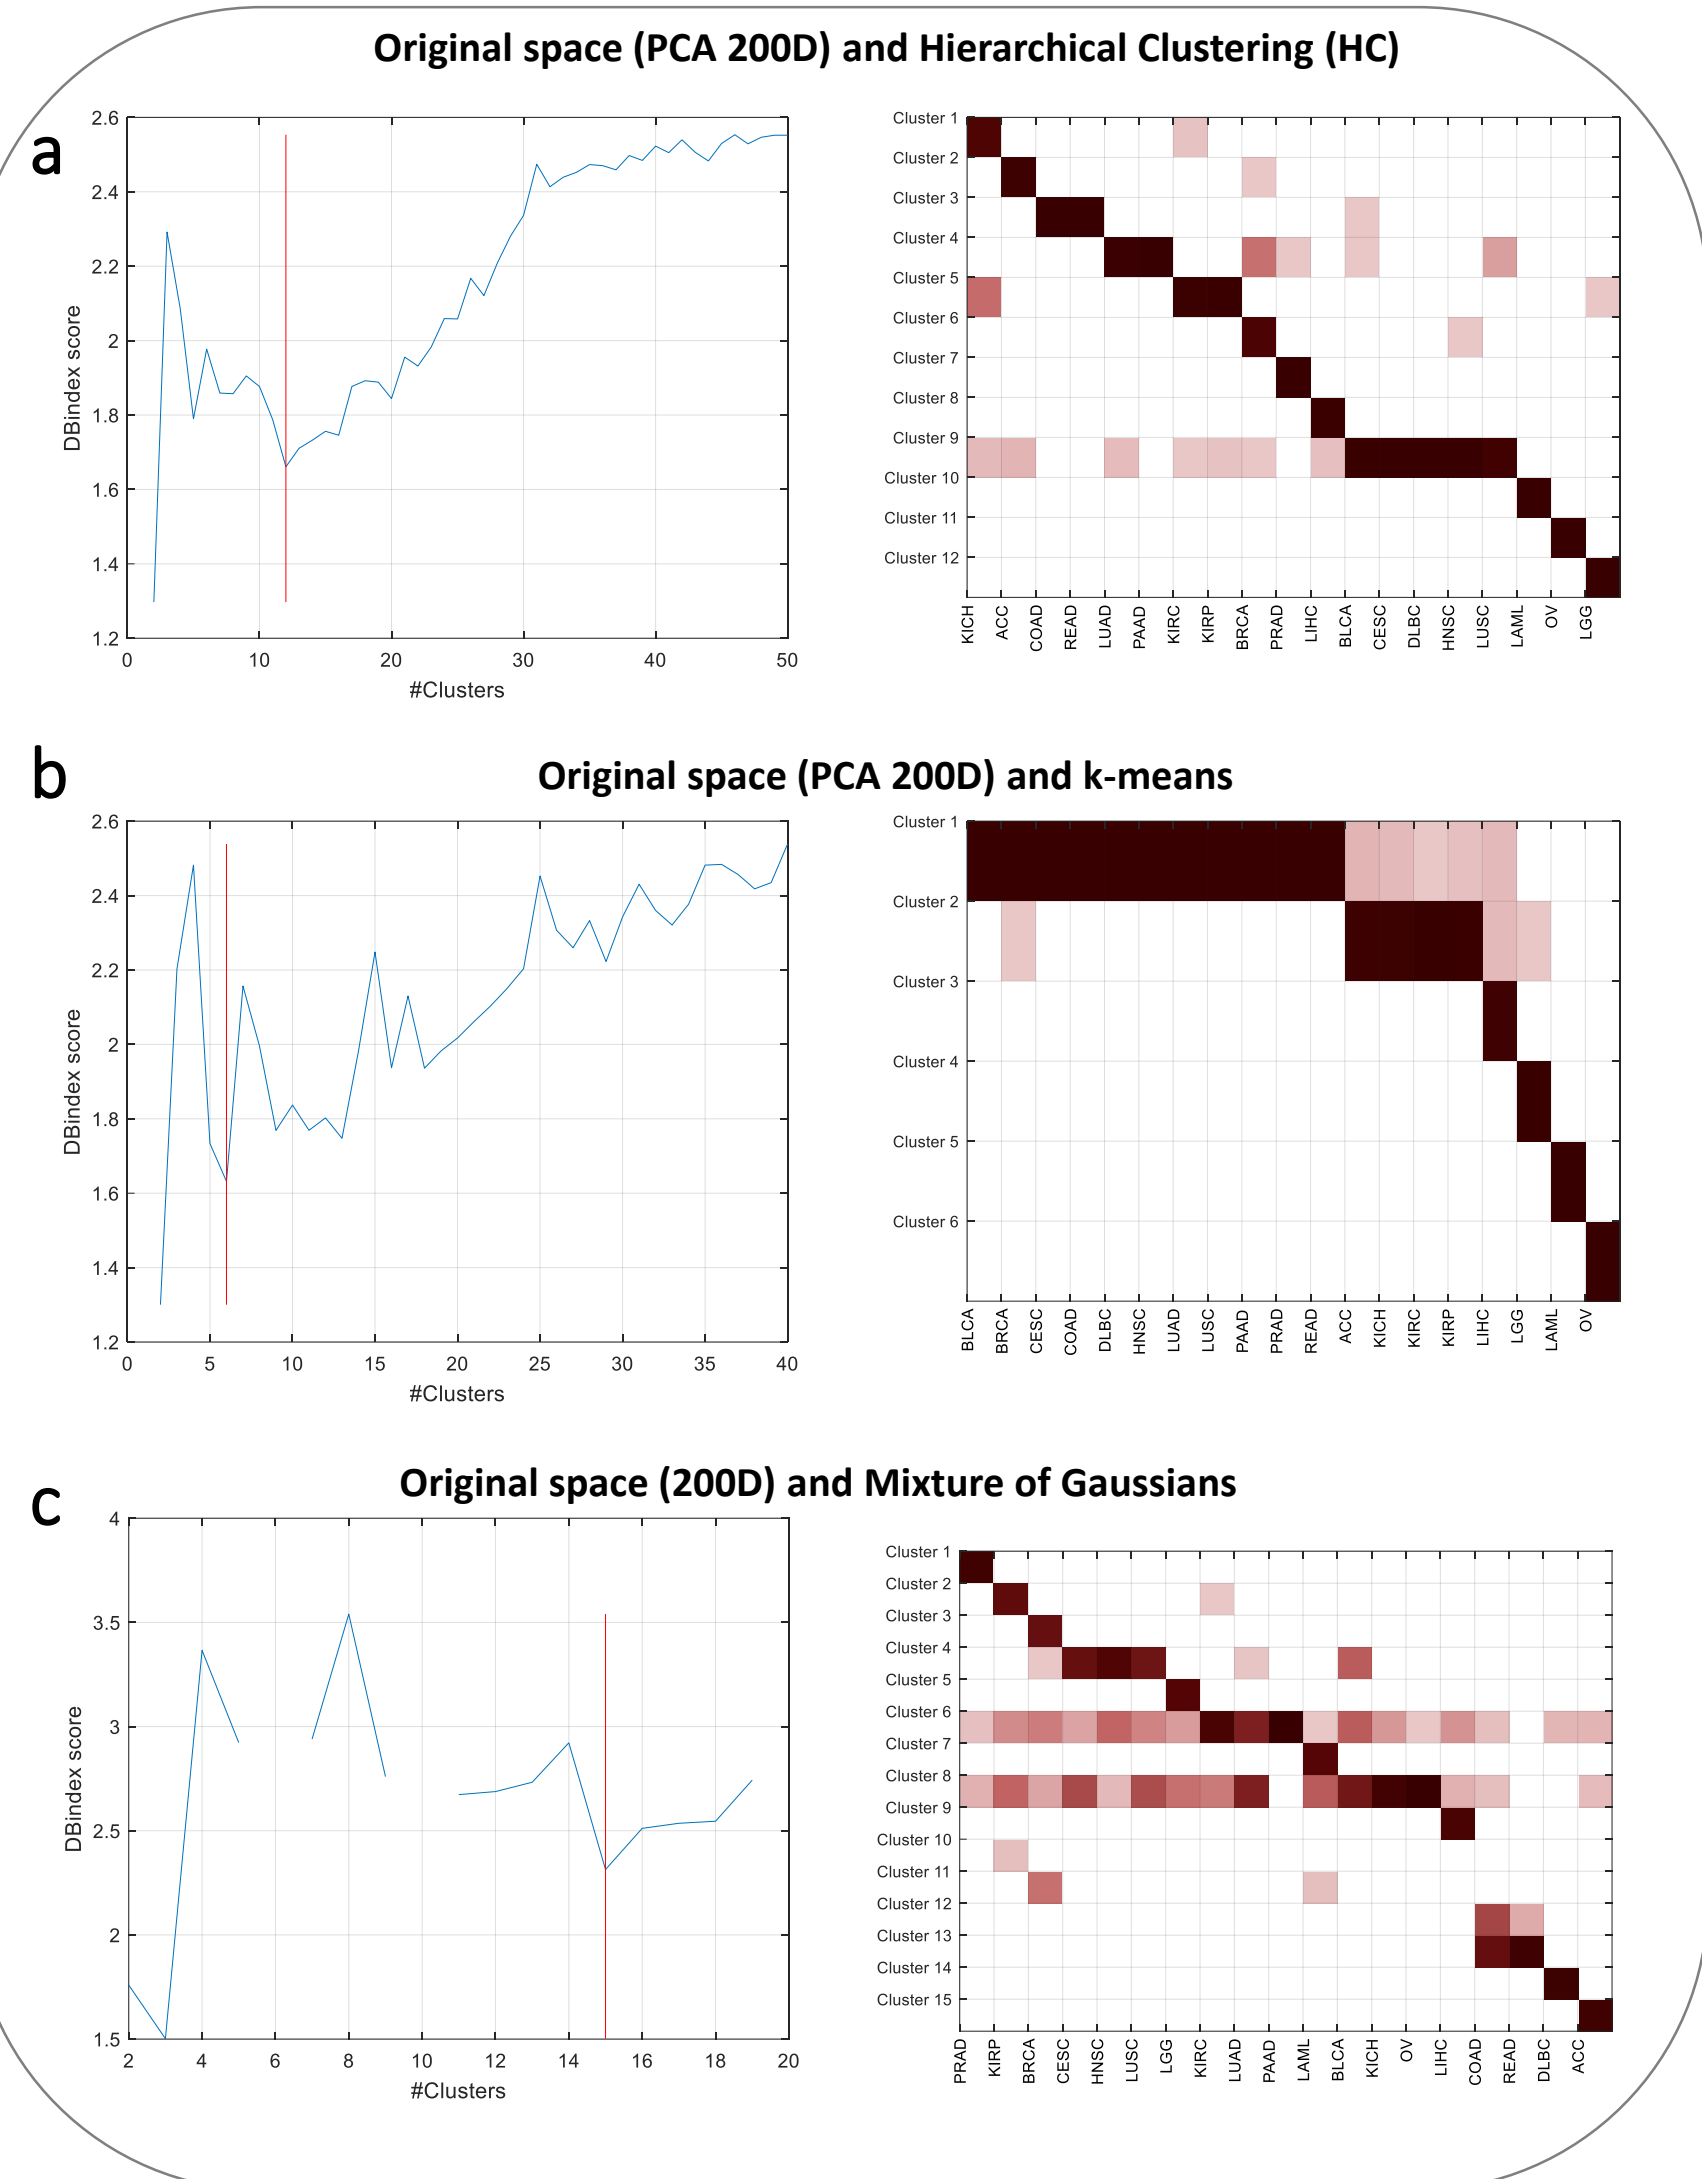

### Low Dimensional Space

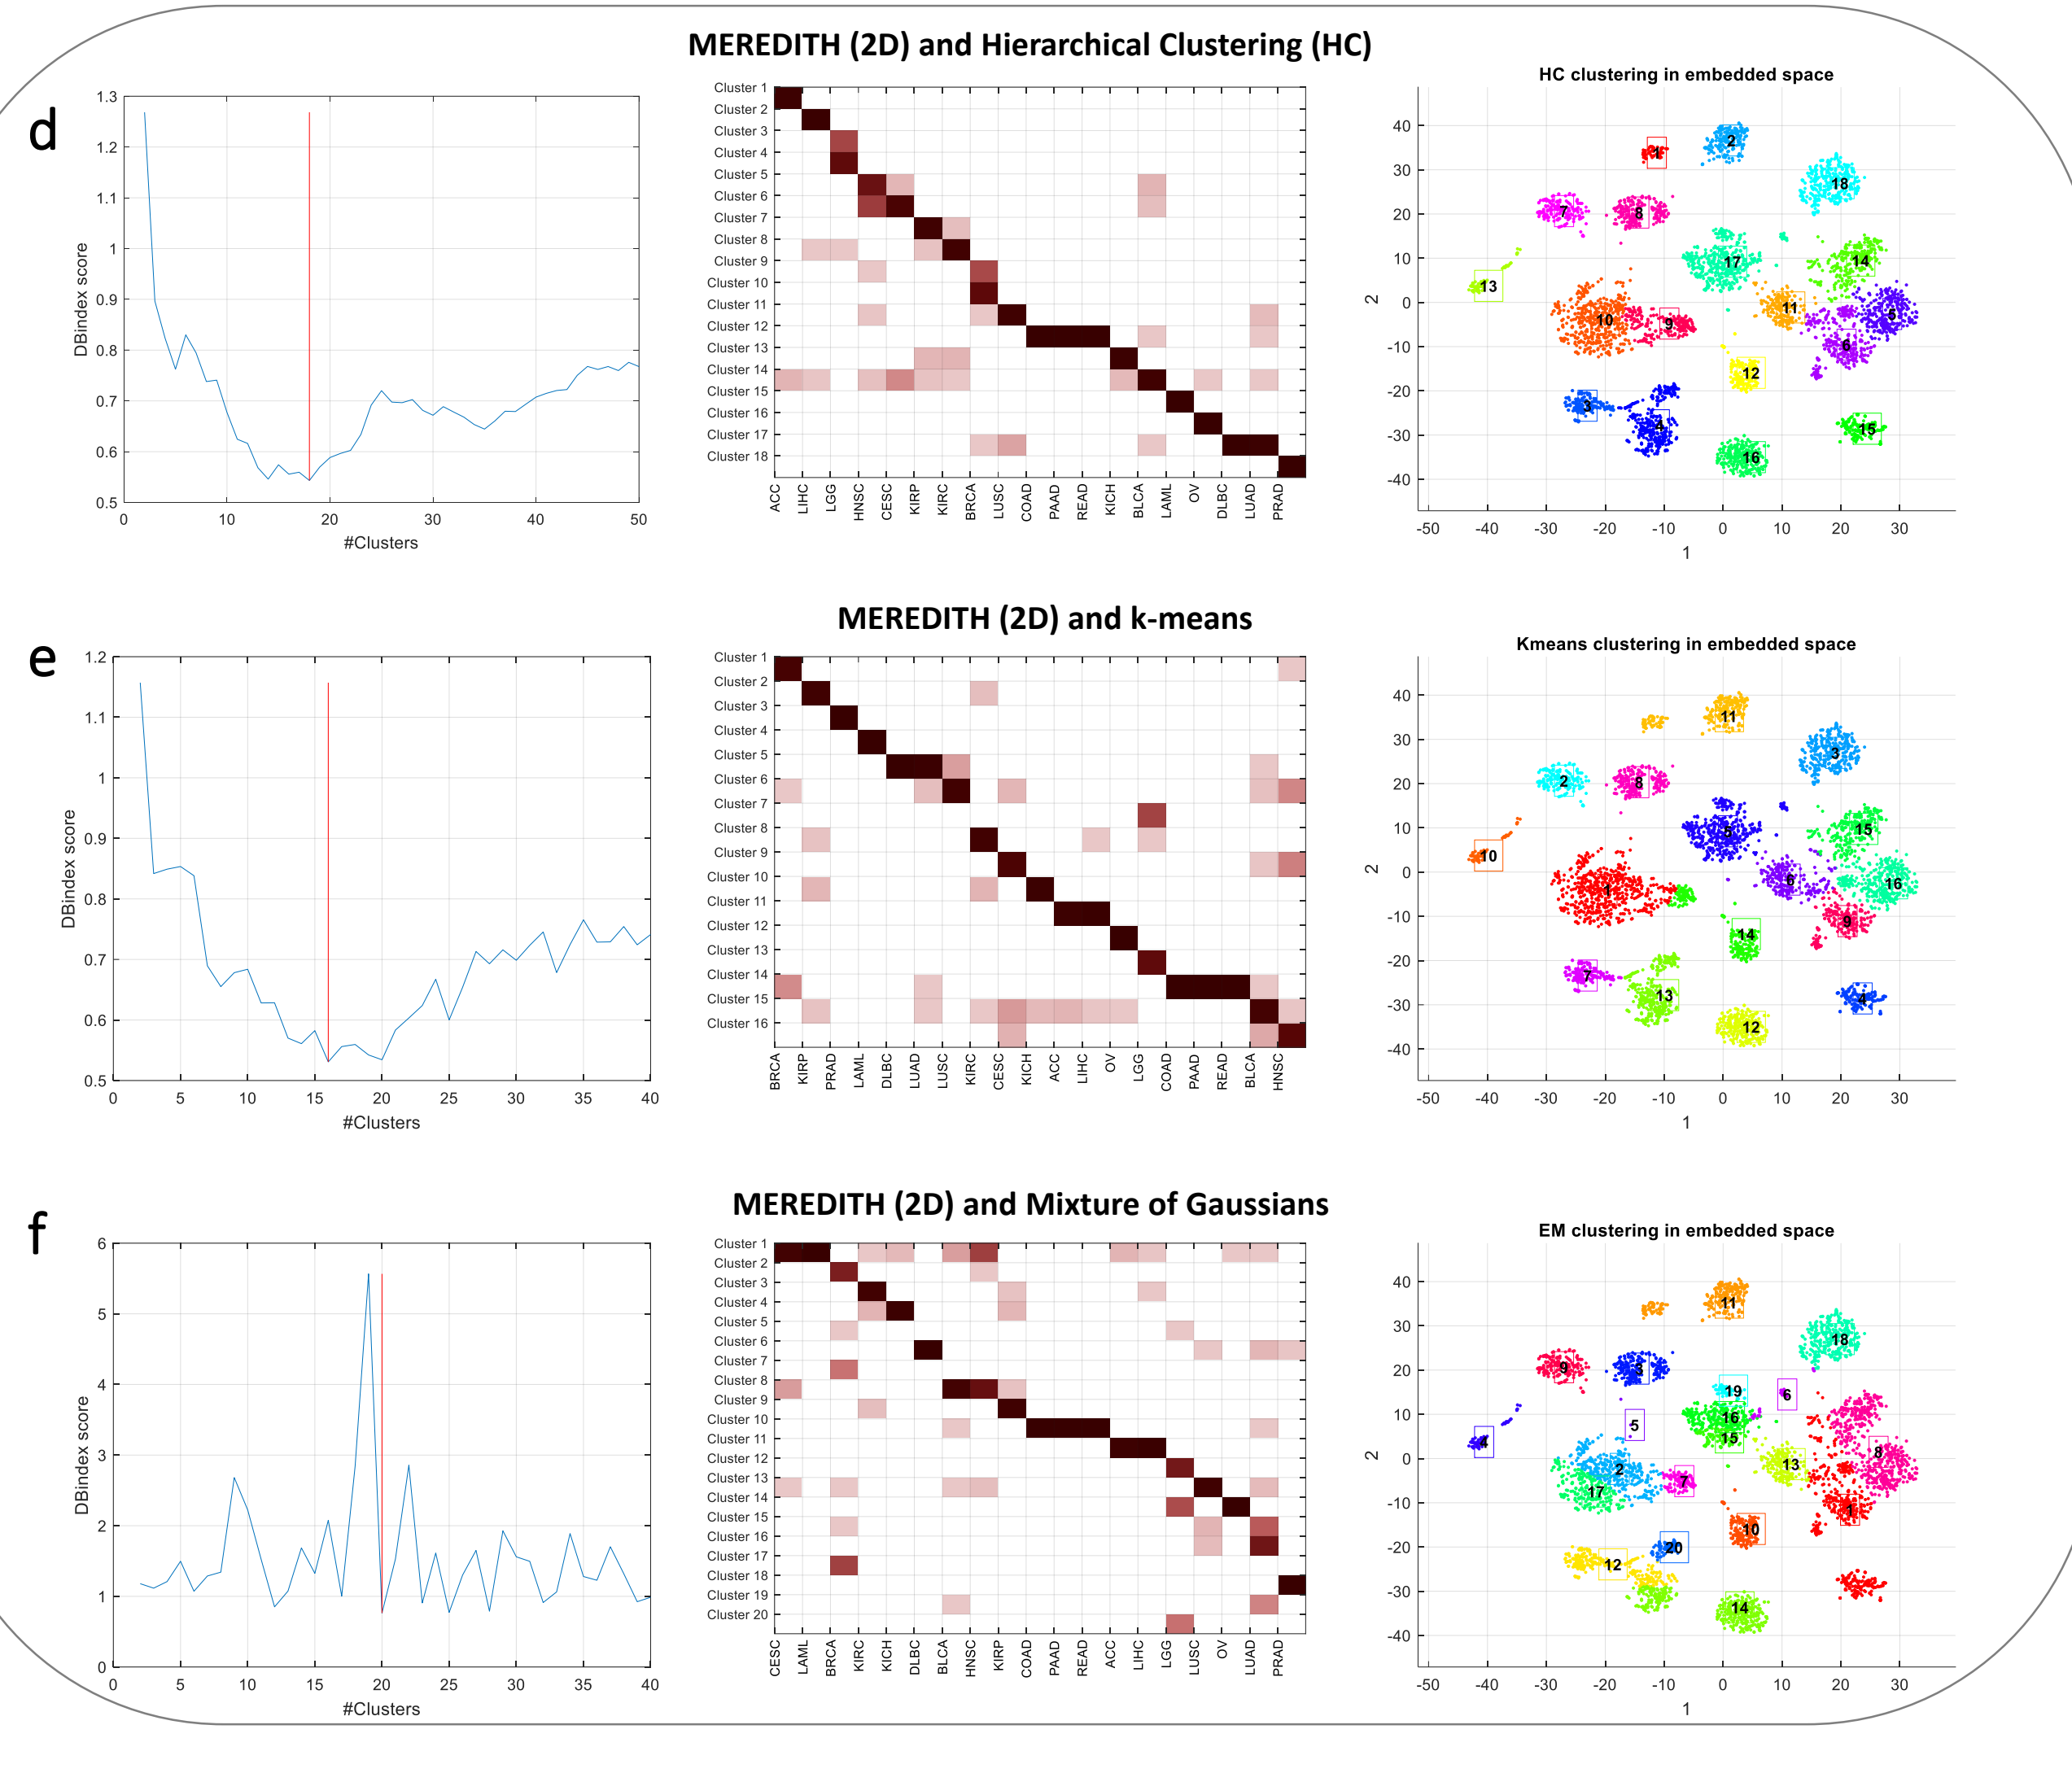

### Low Dimensional PCA Space

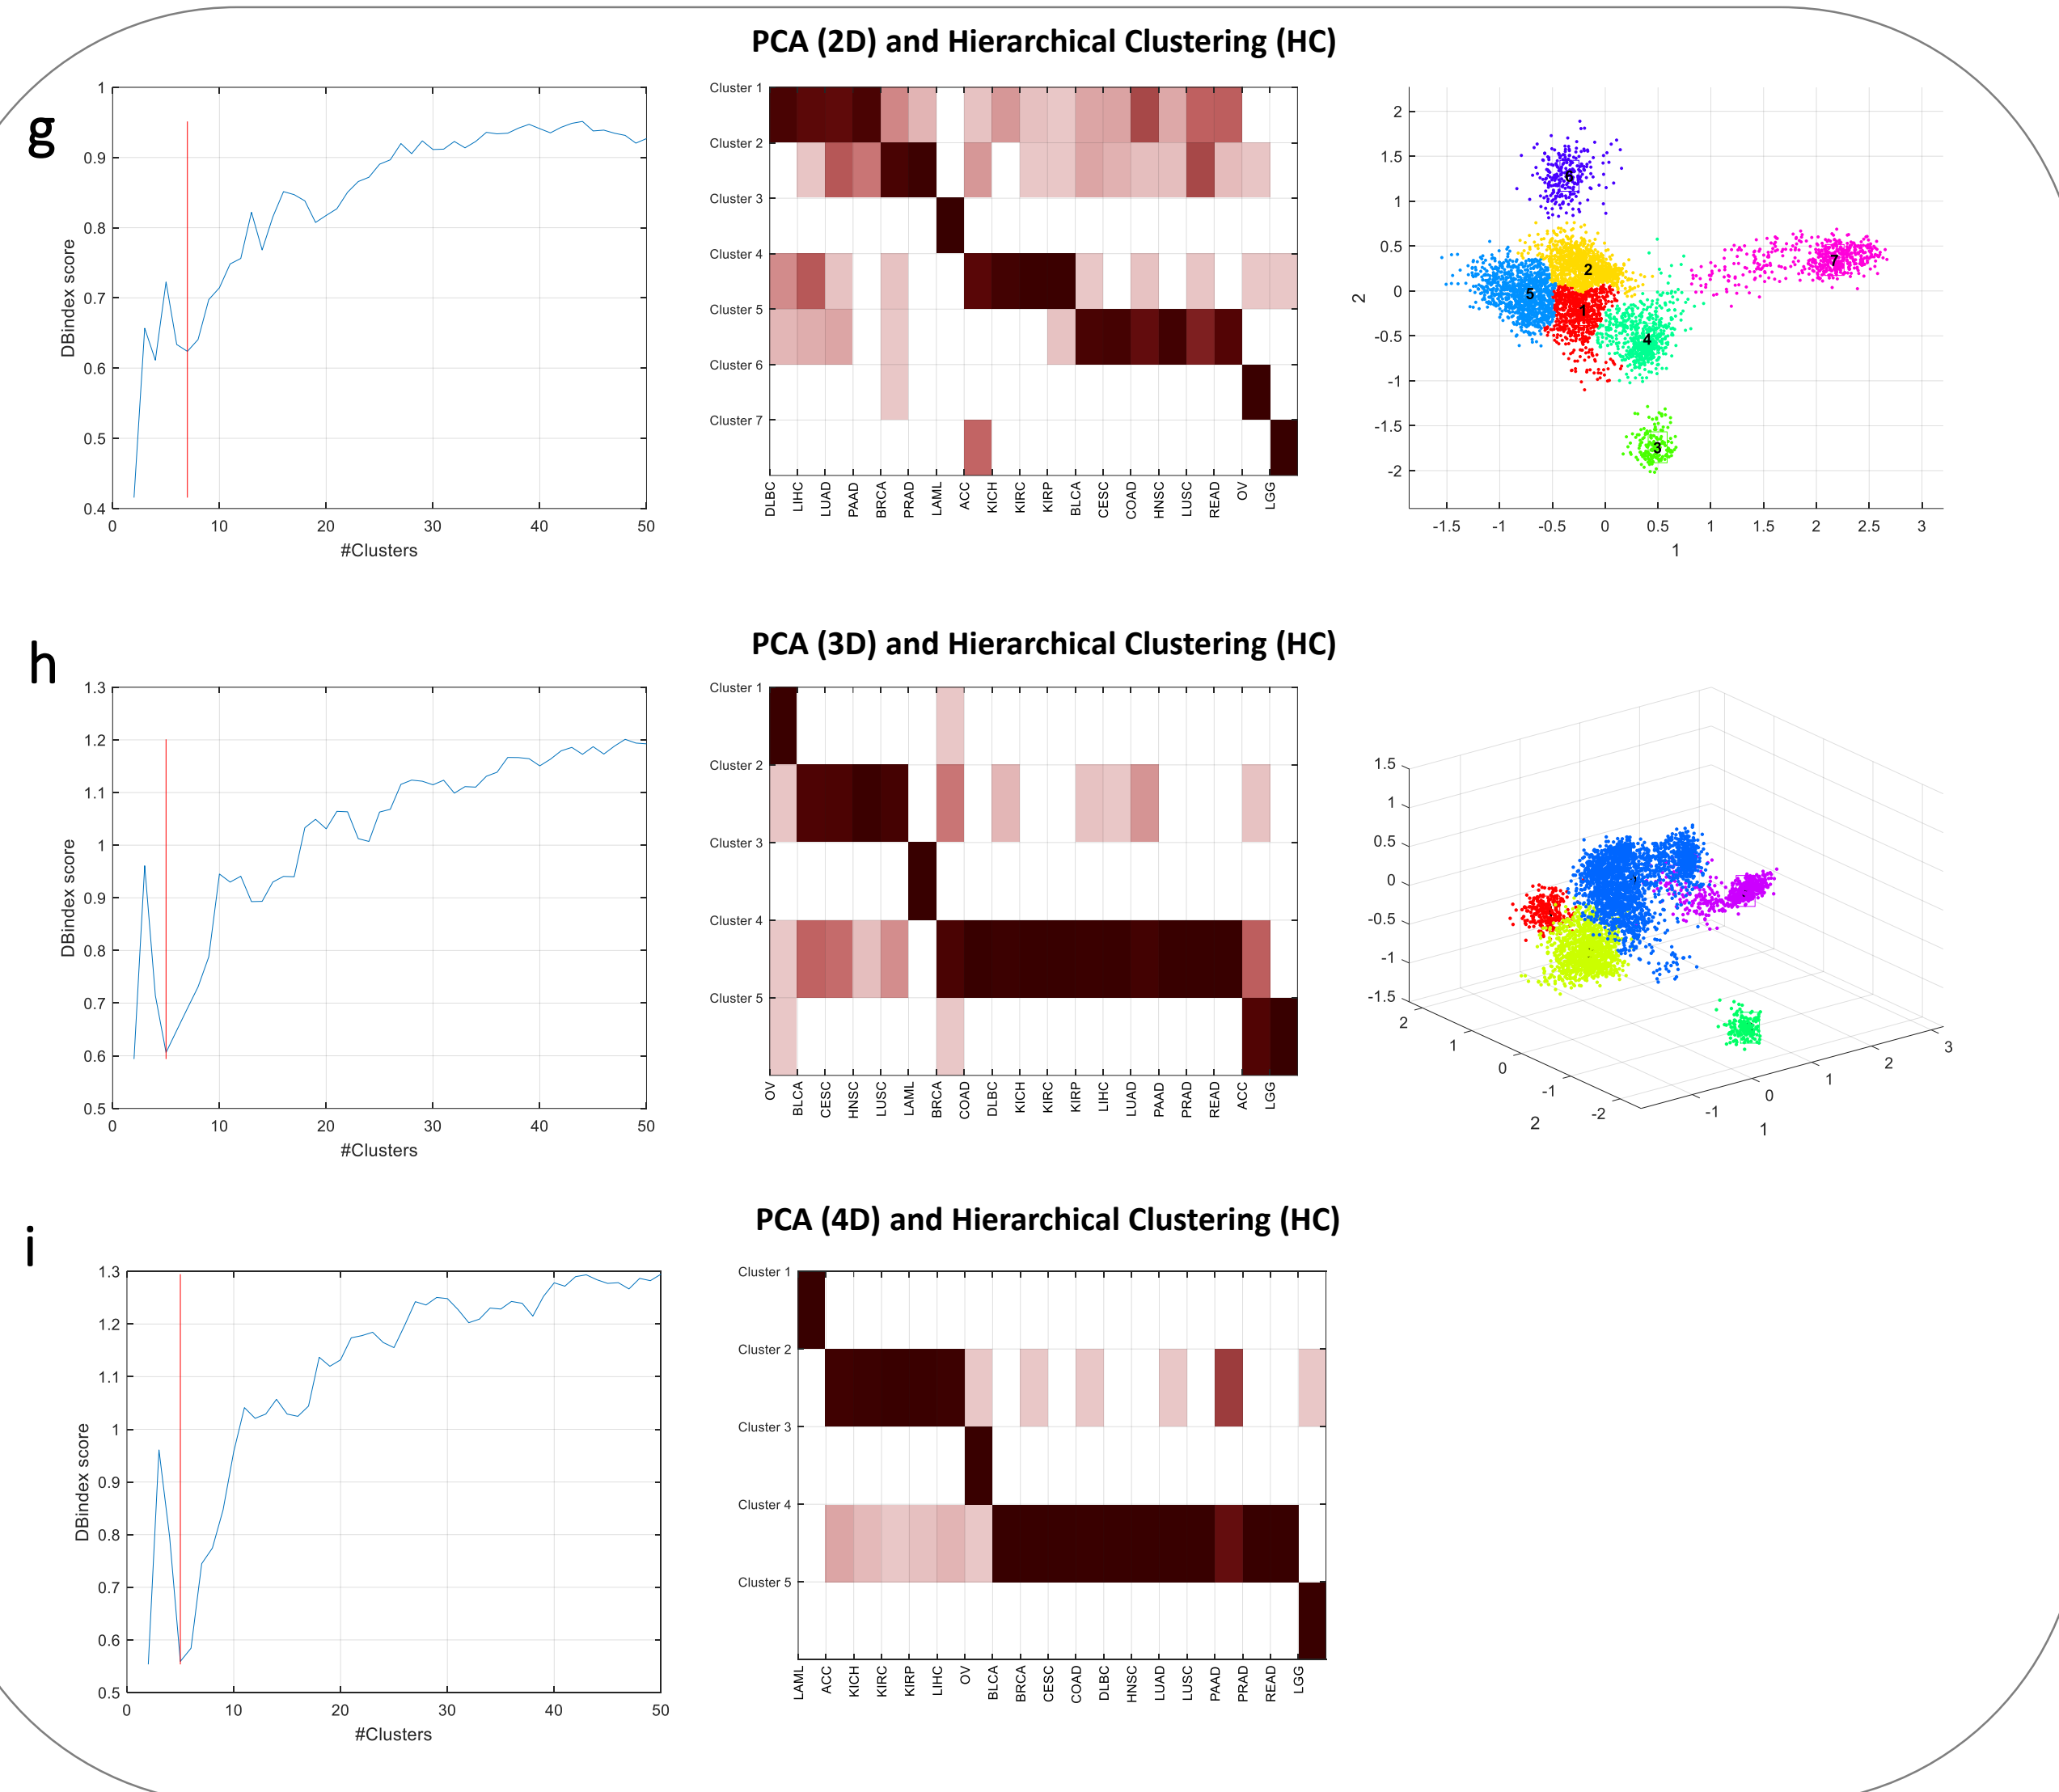



Figure S6

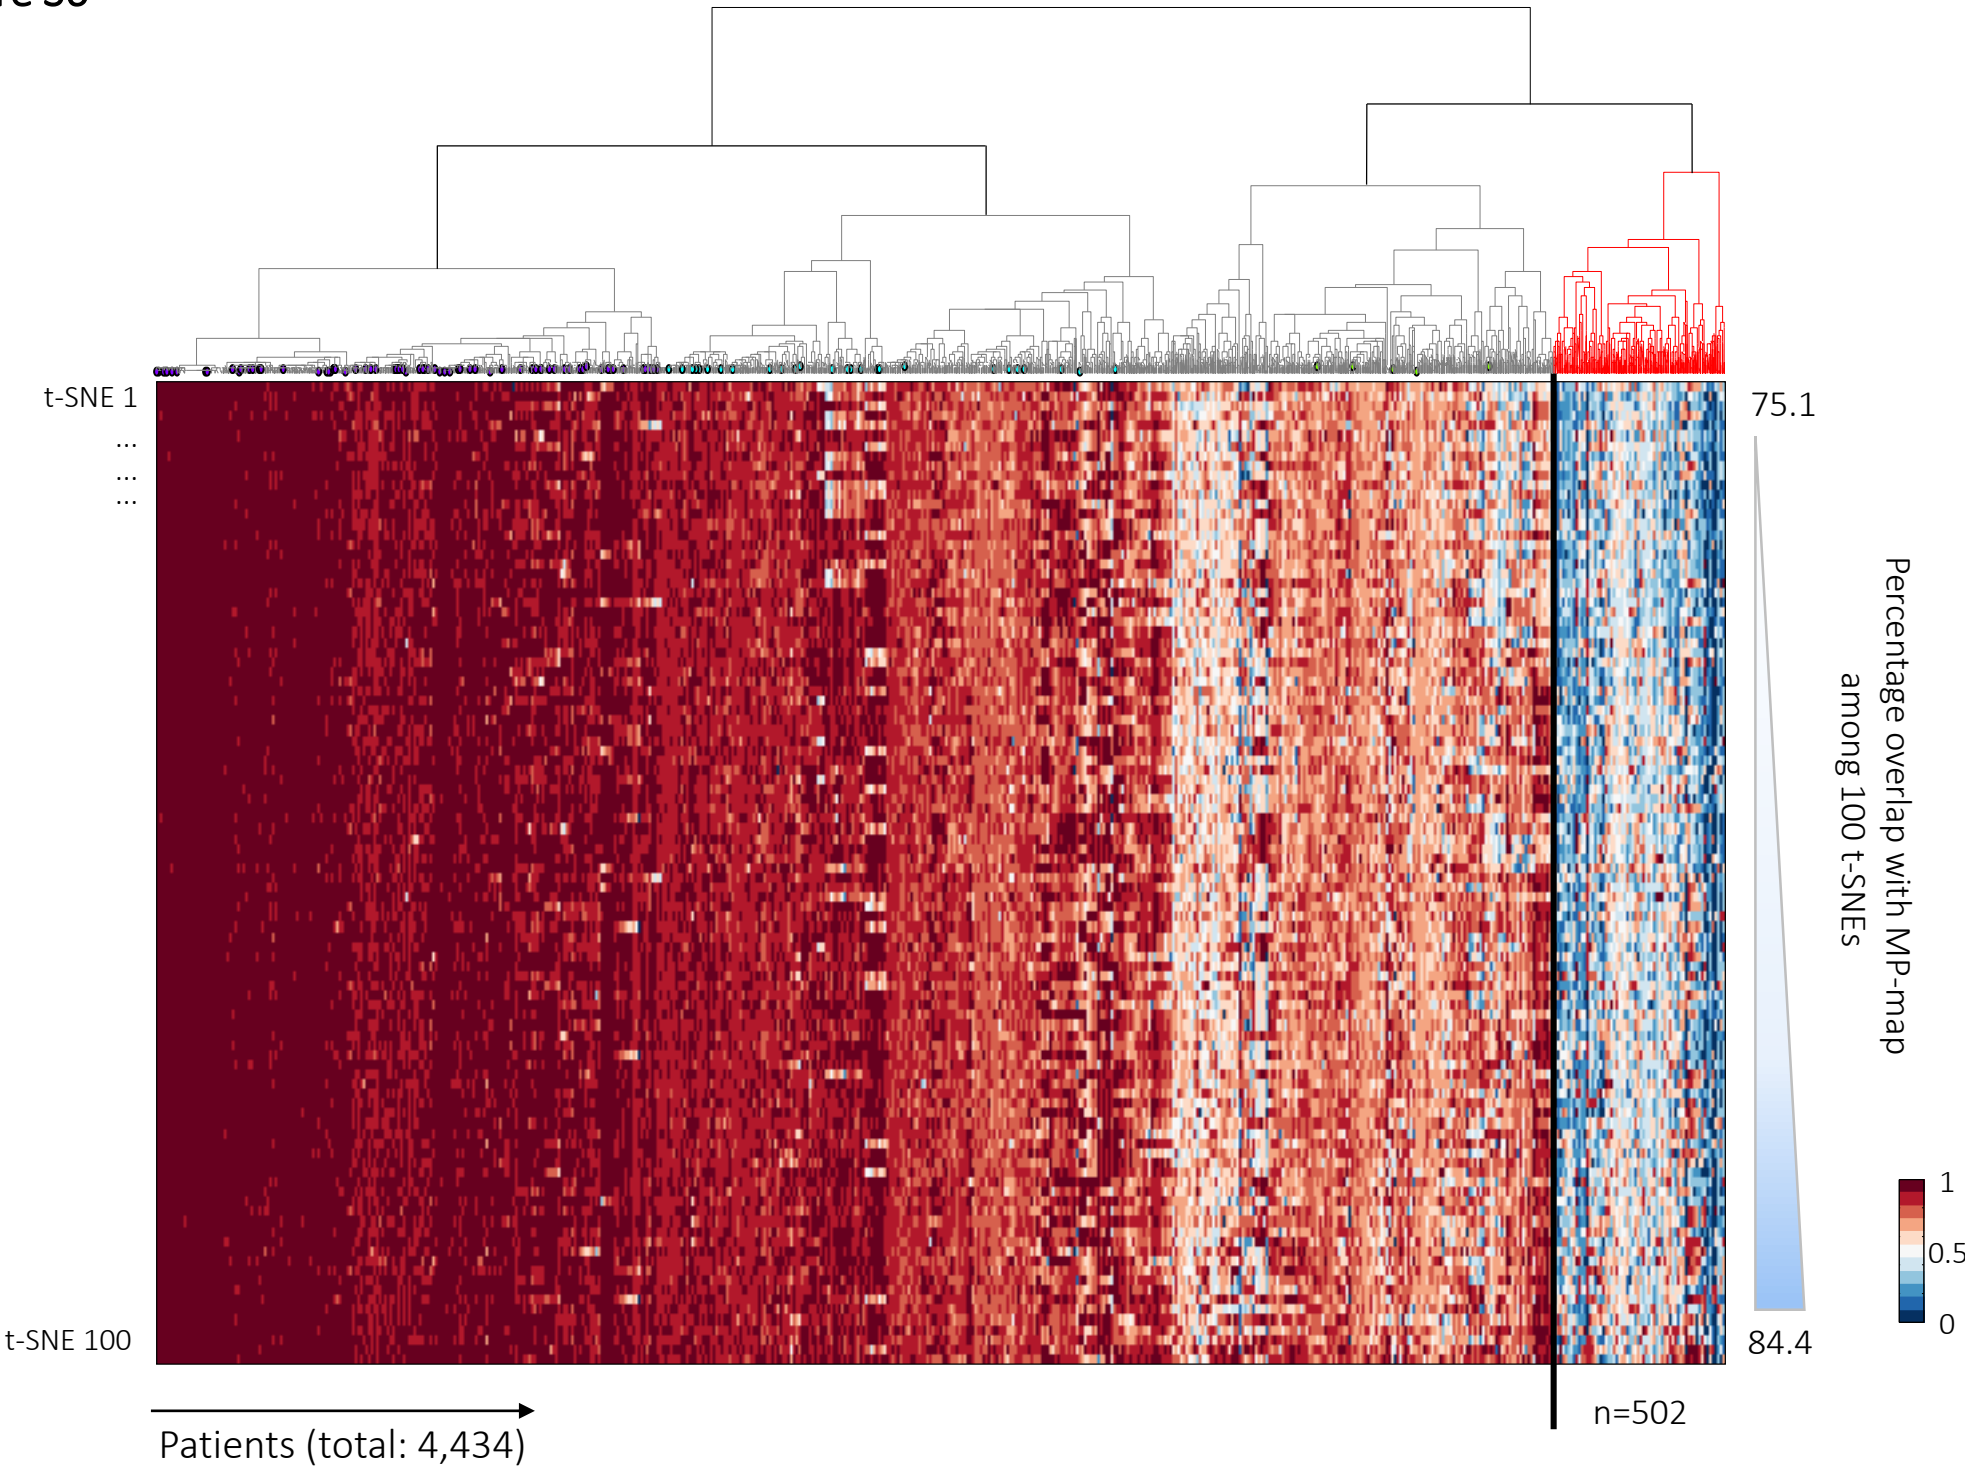

Figure S7

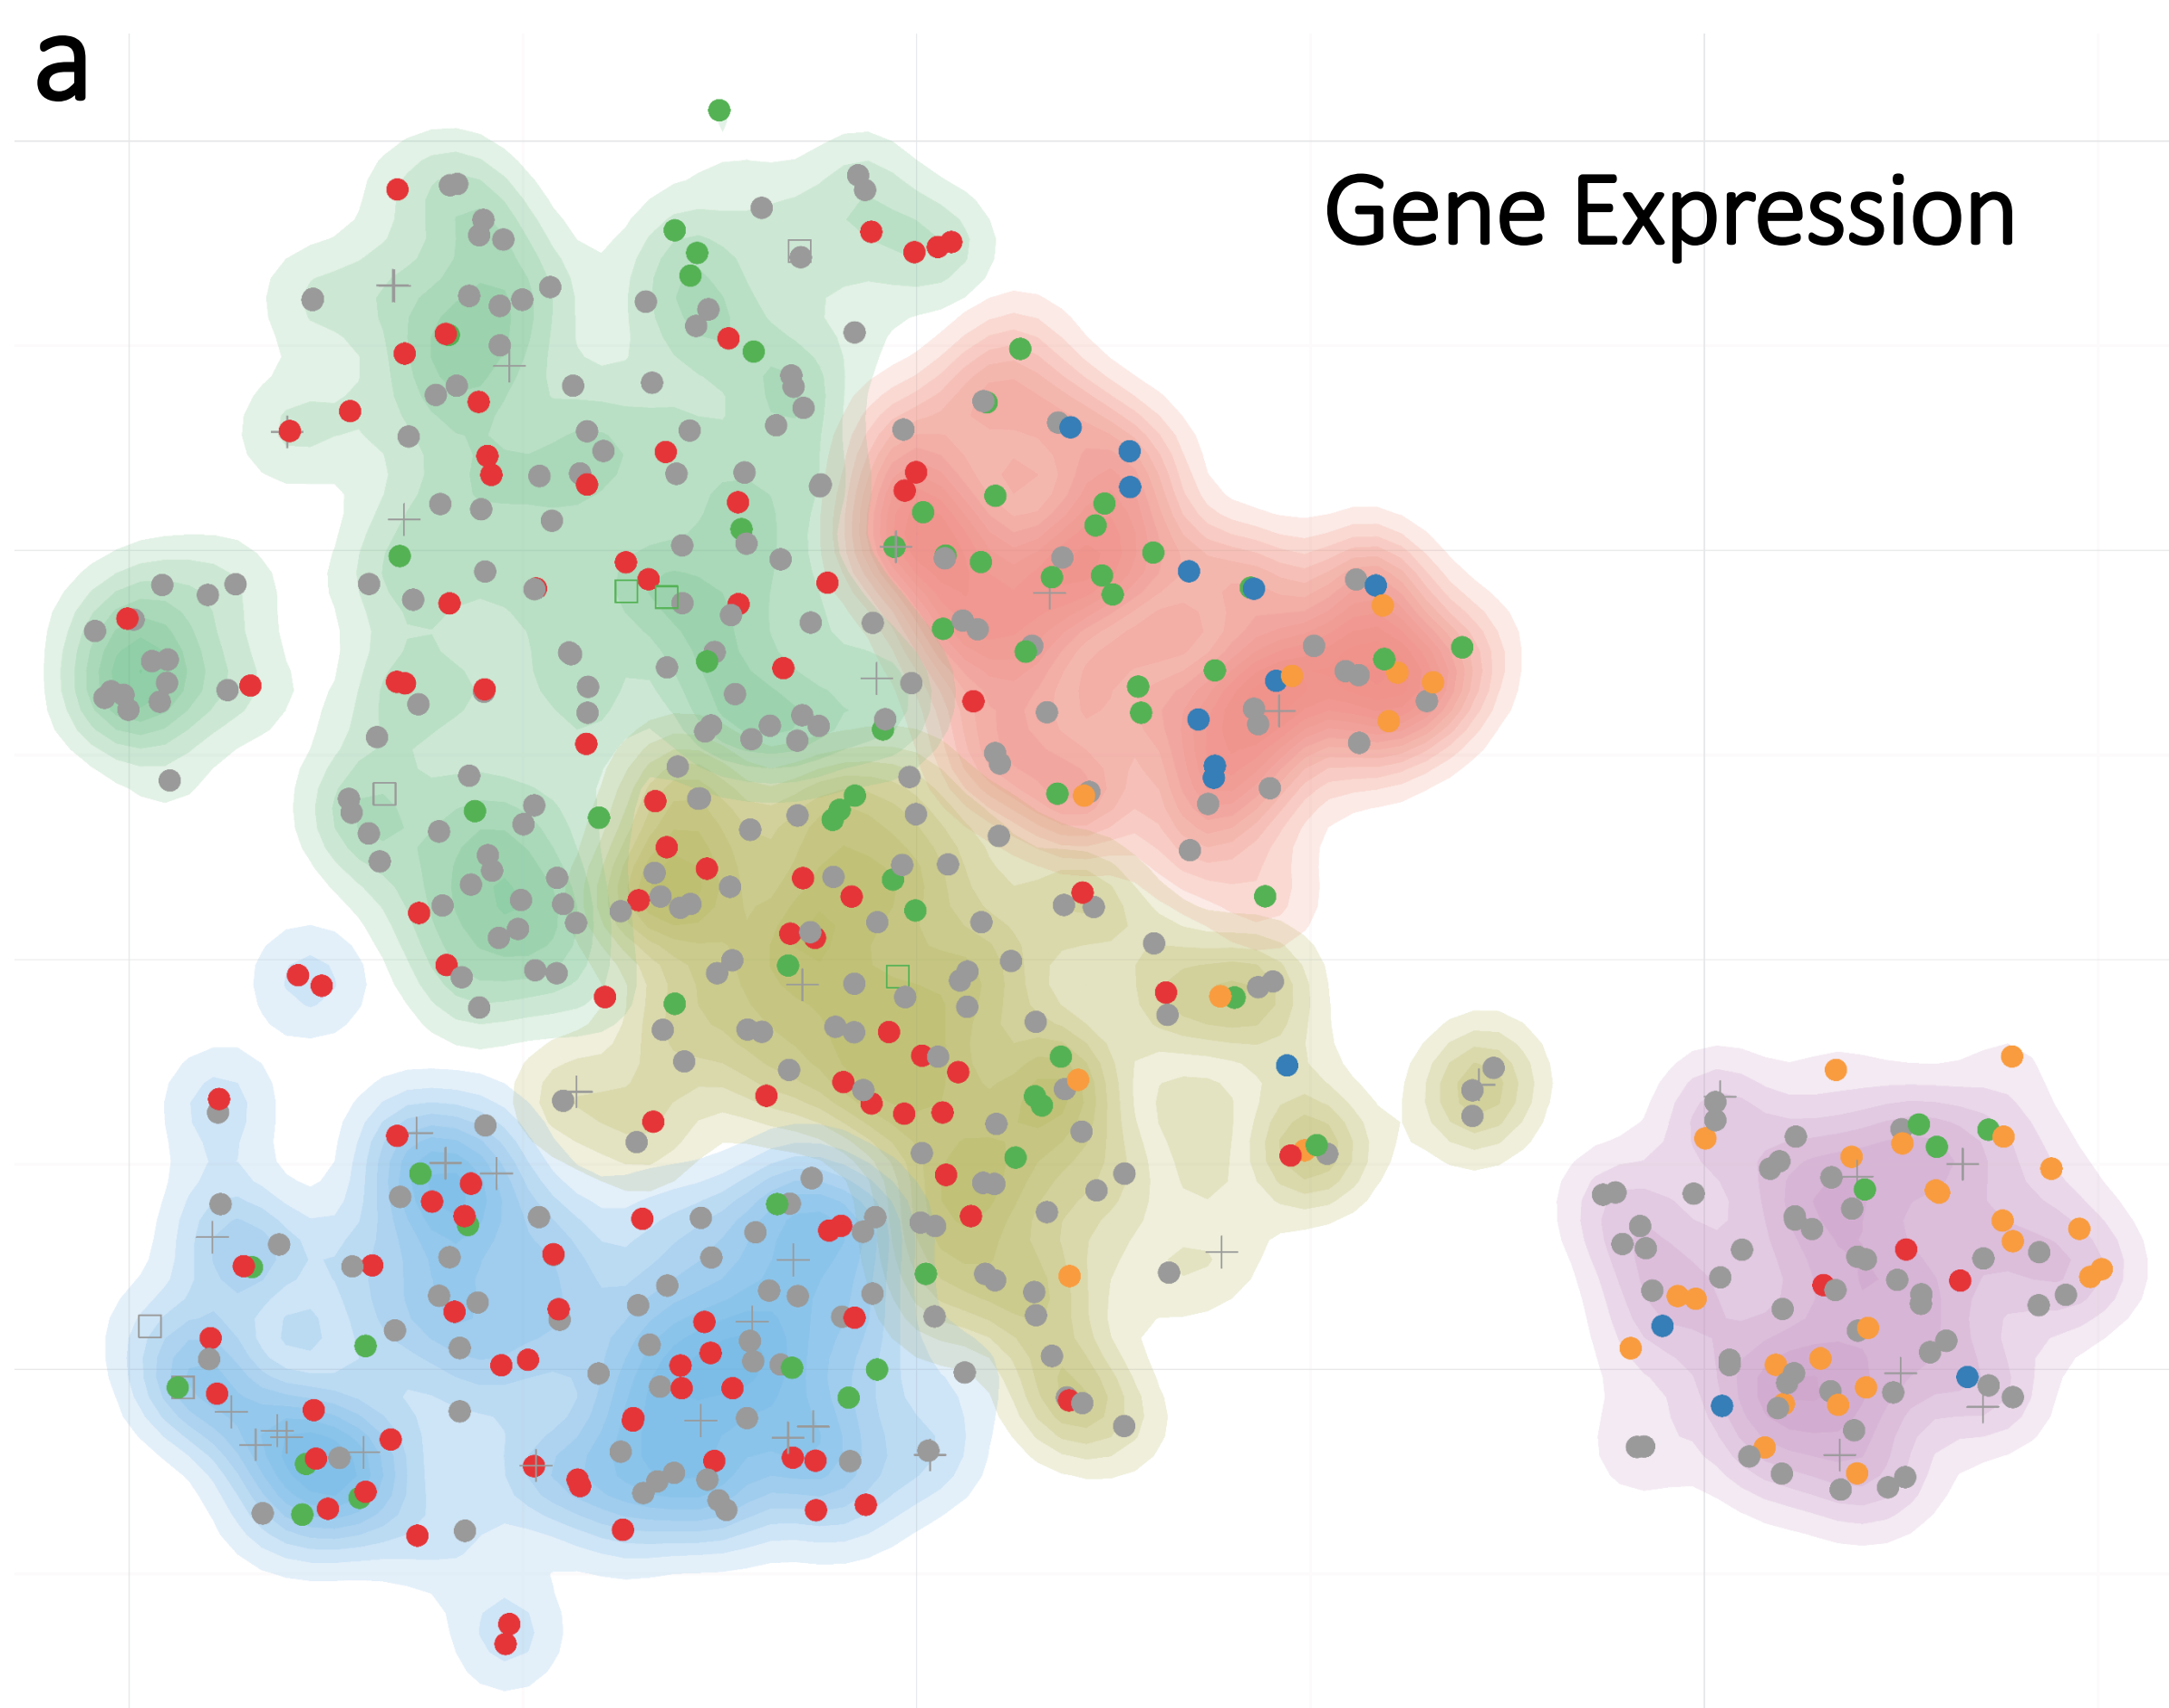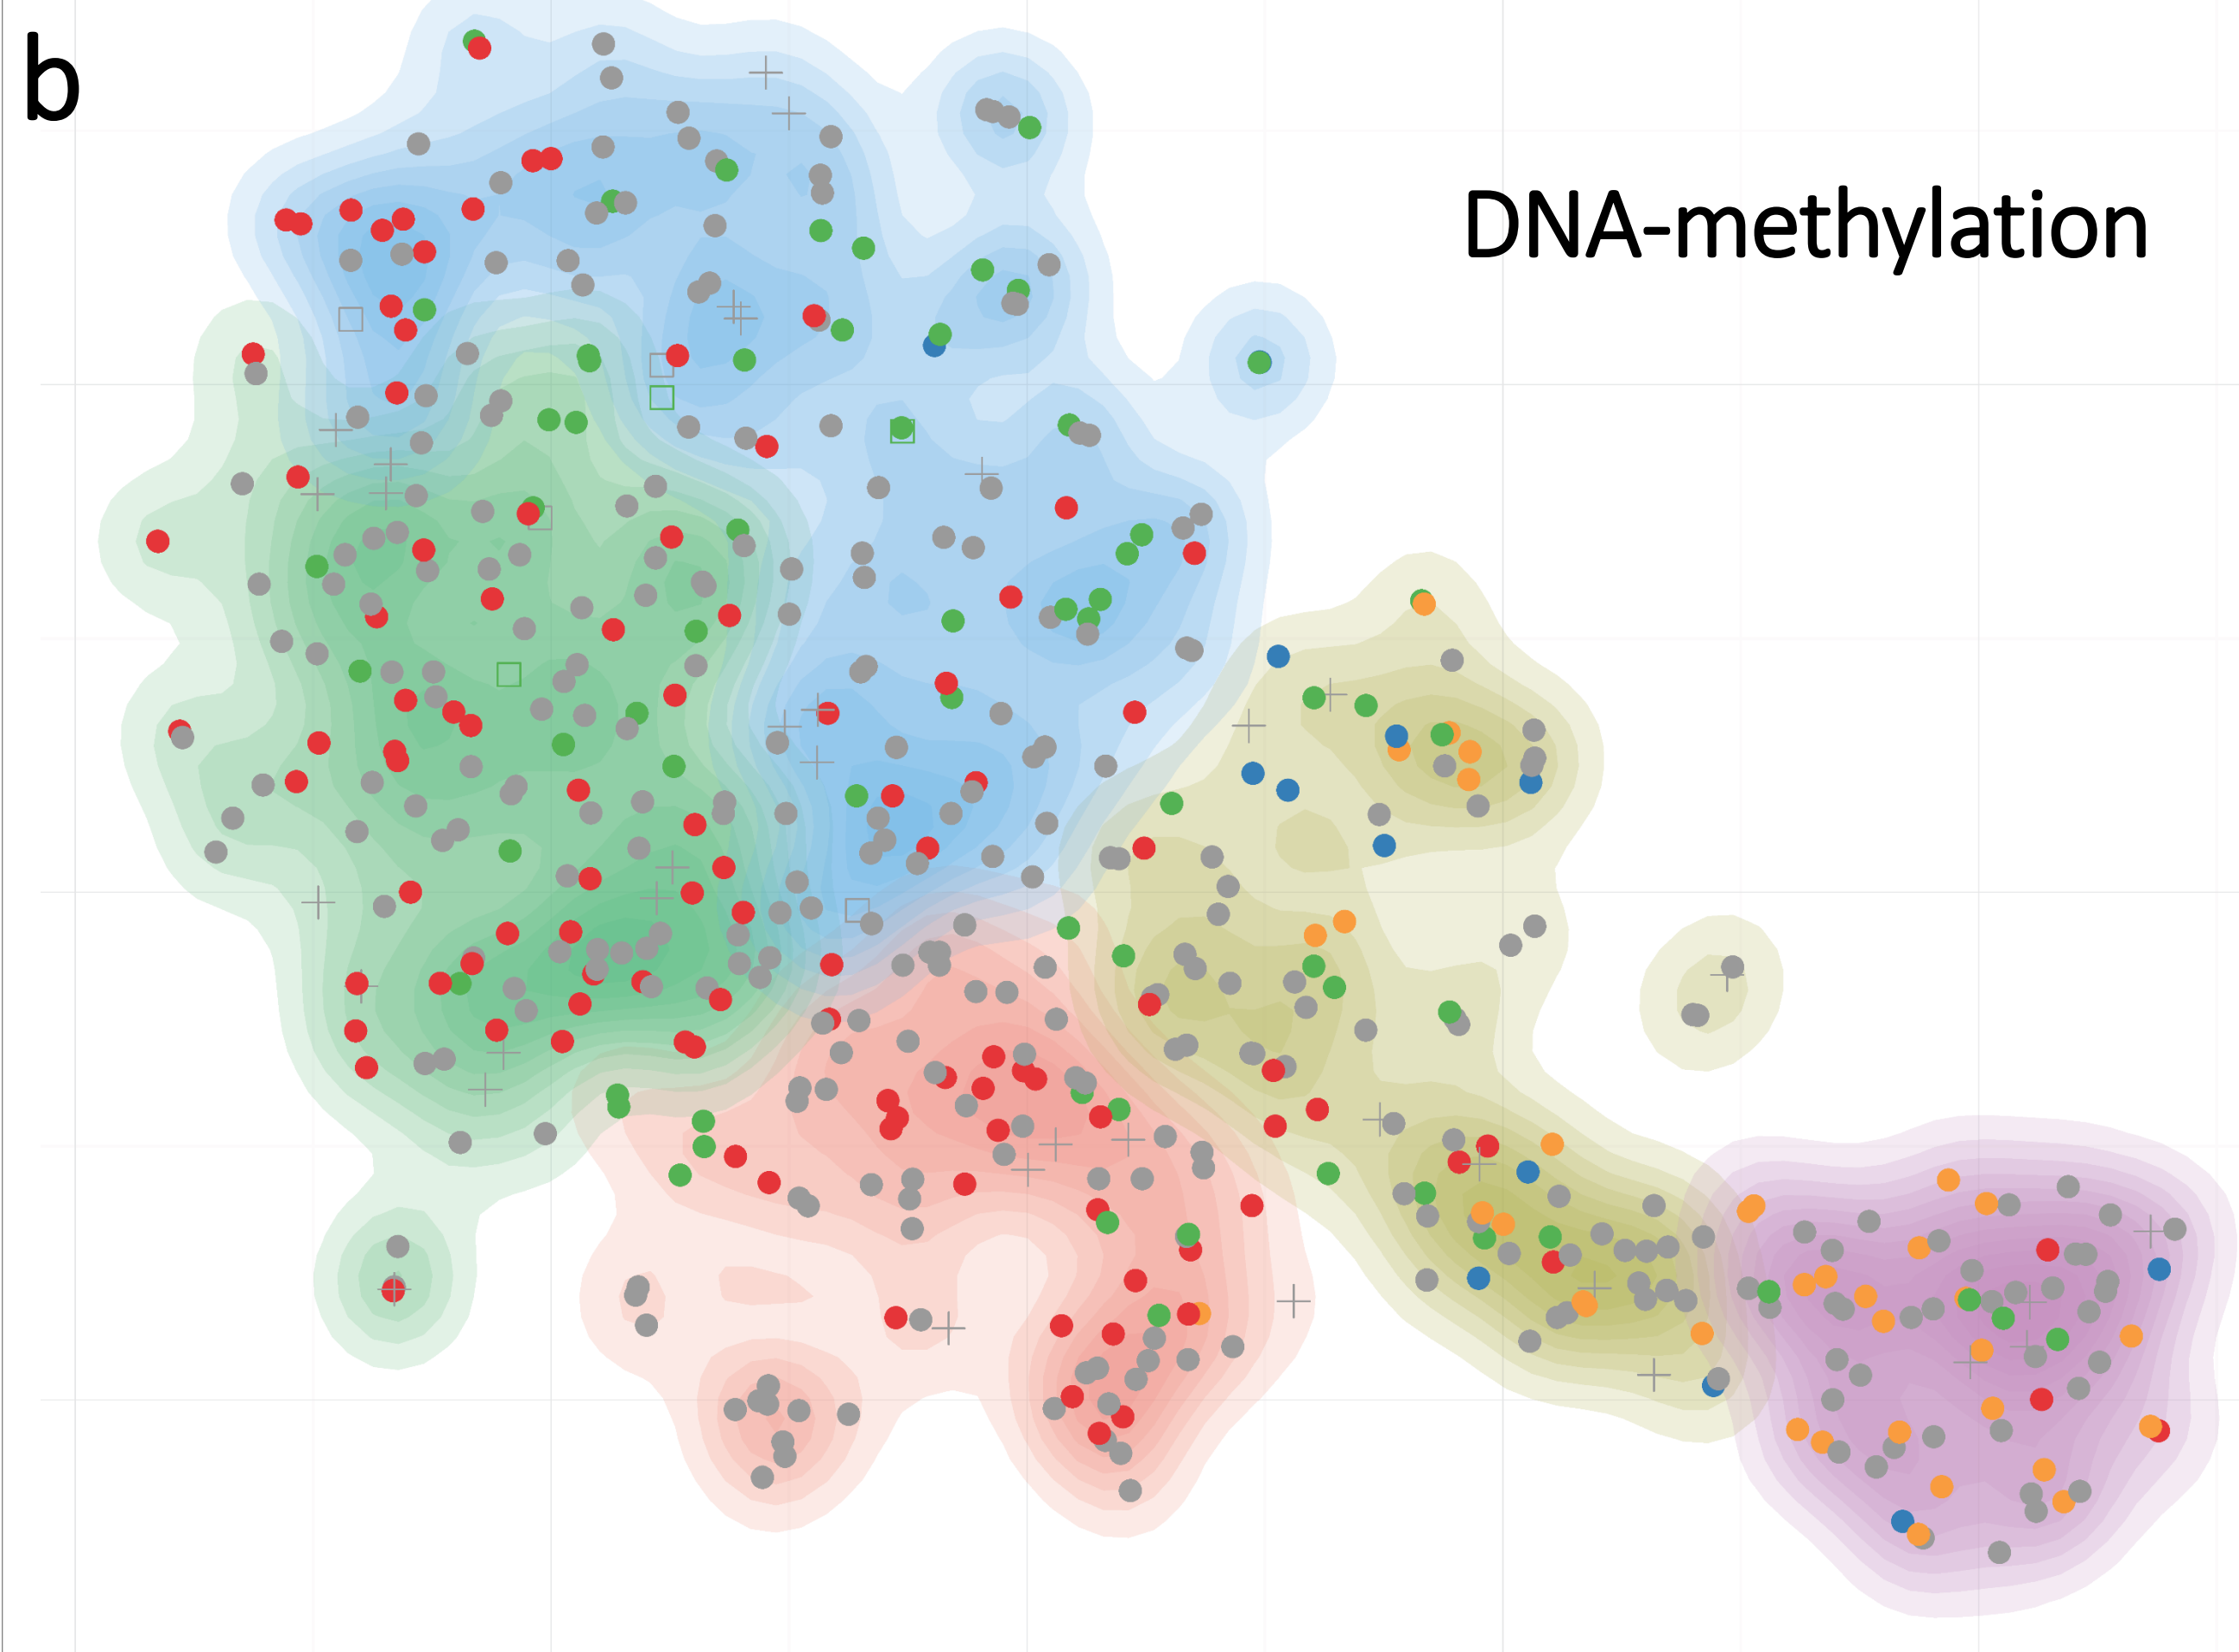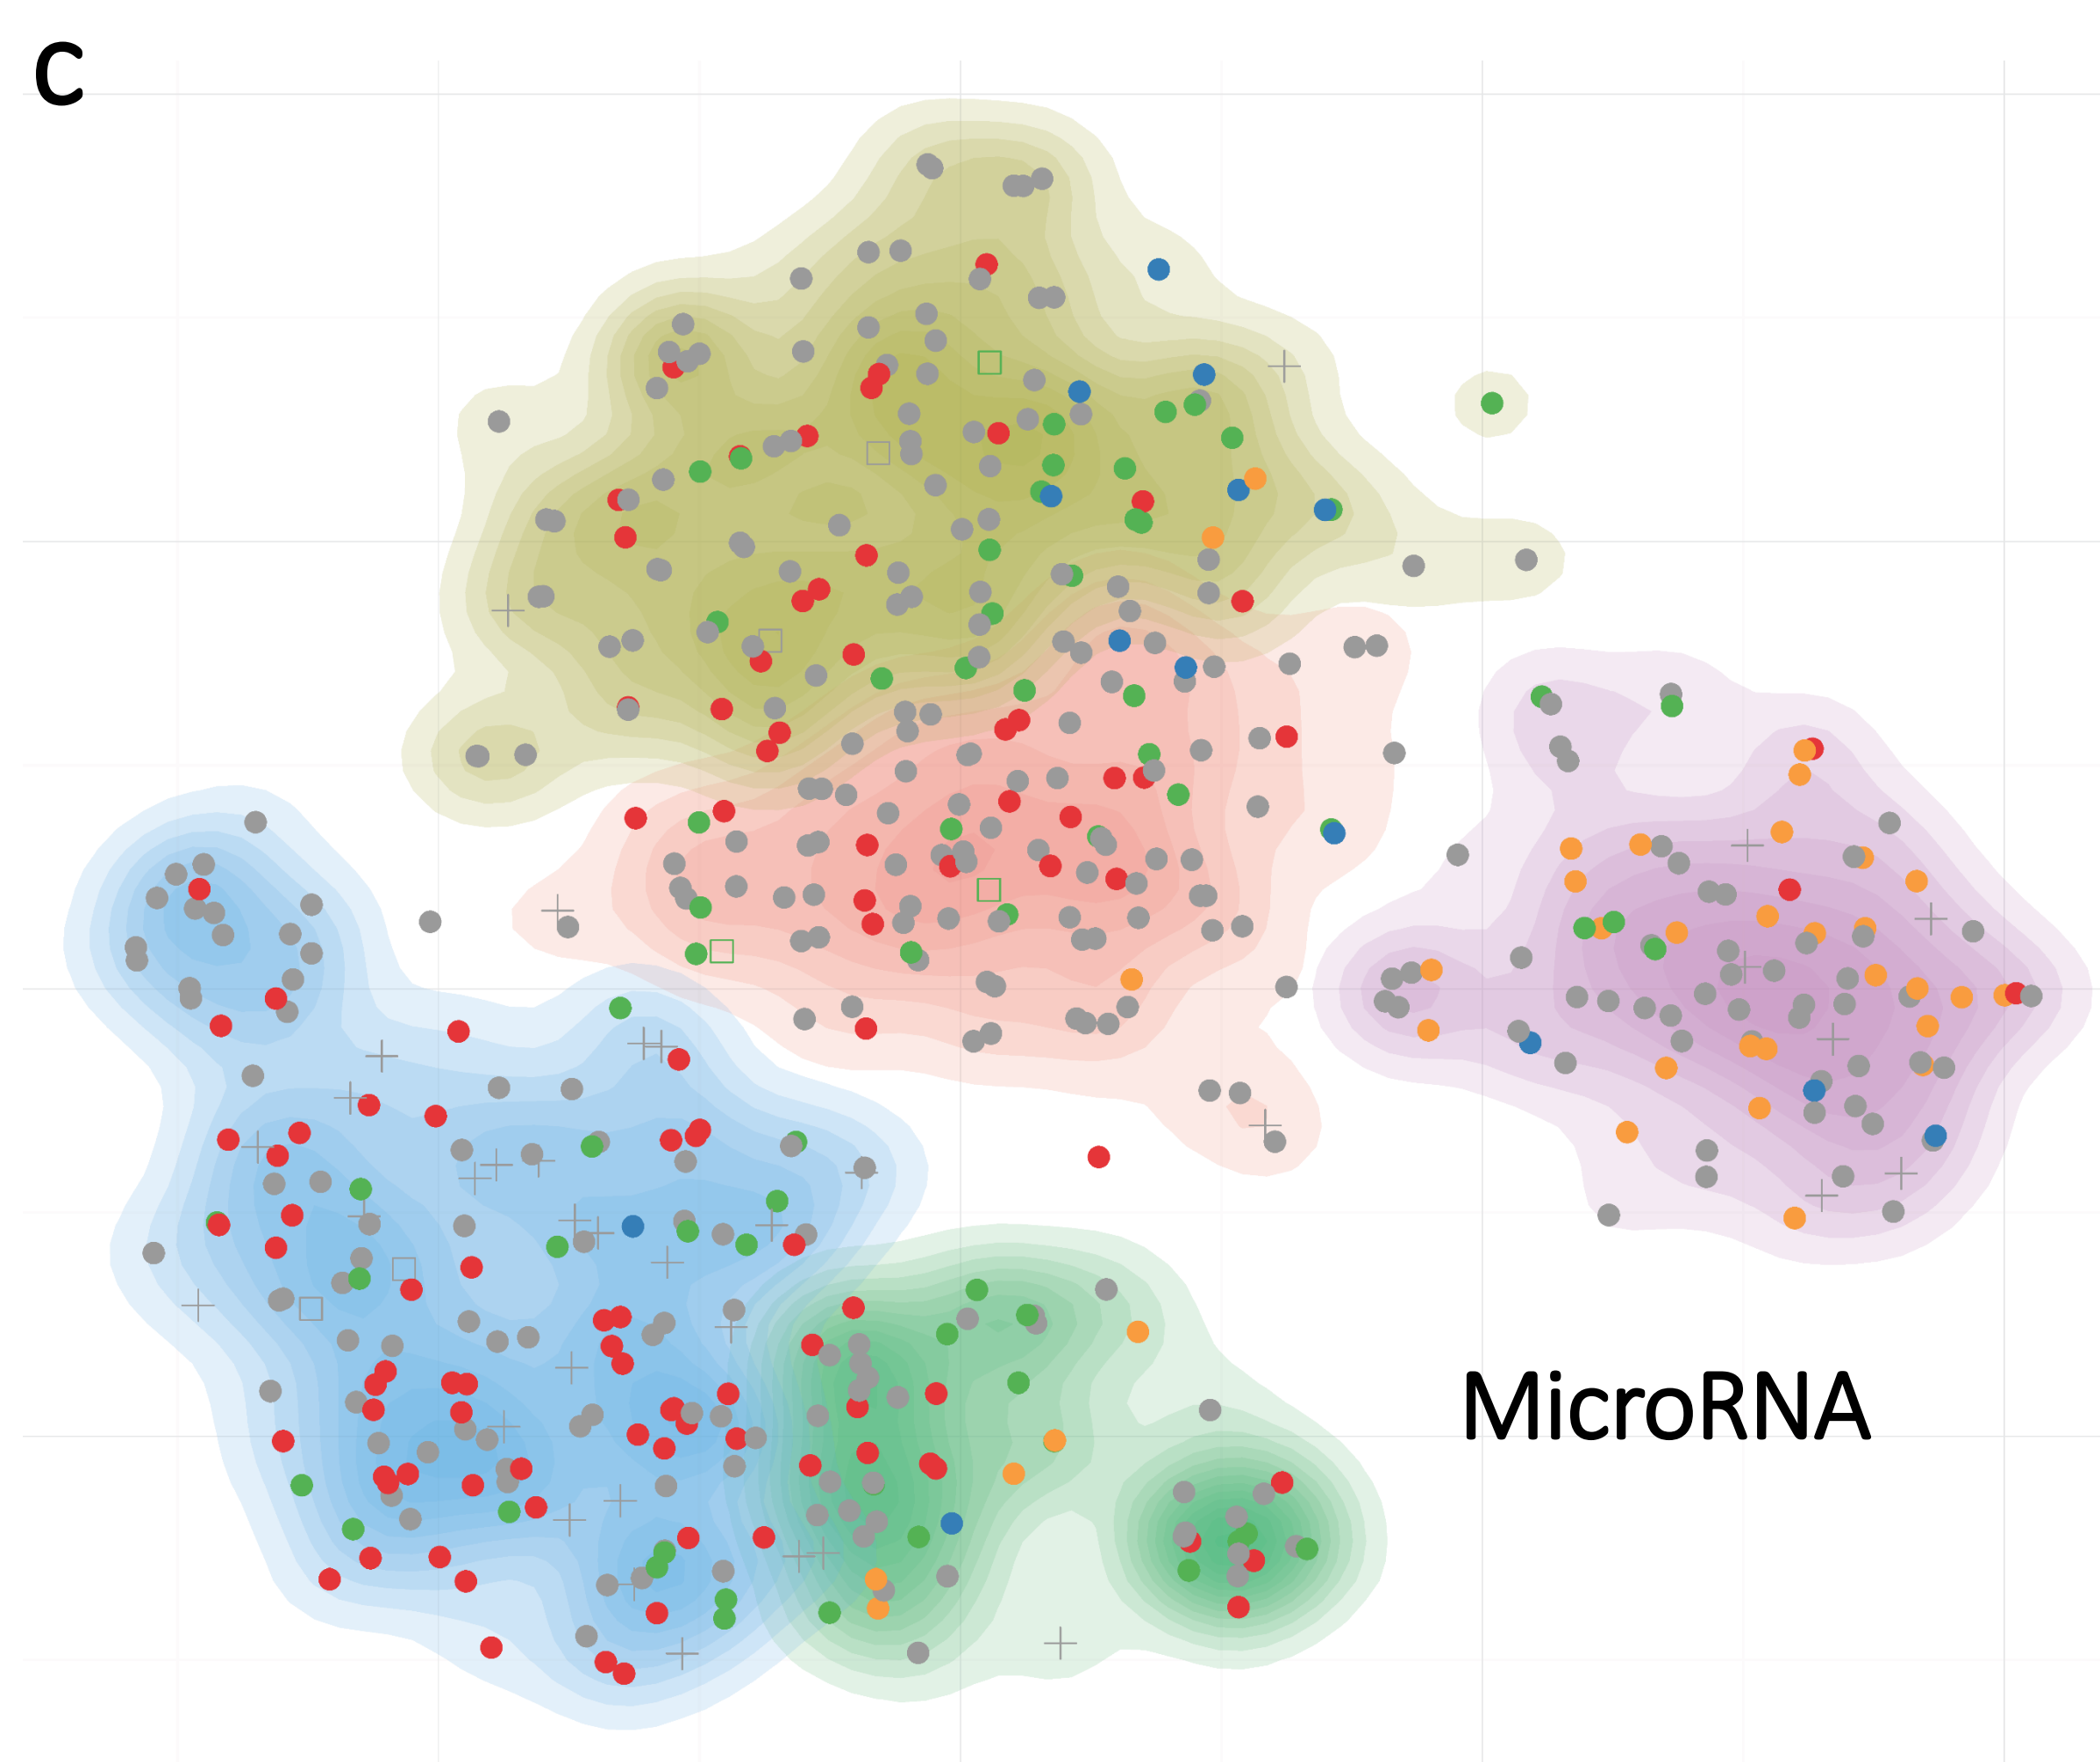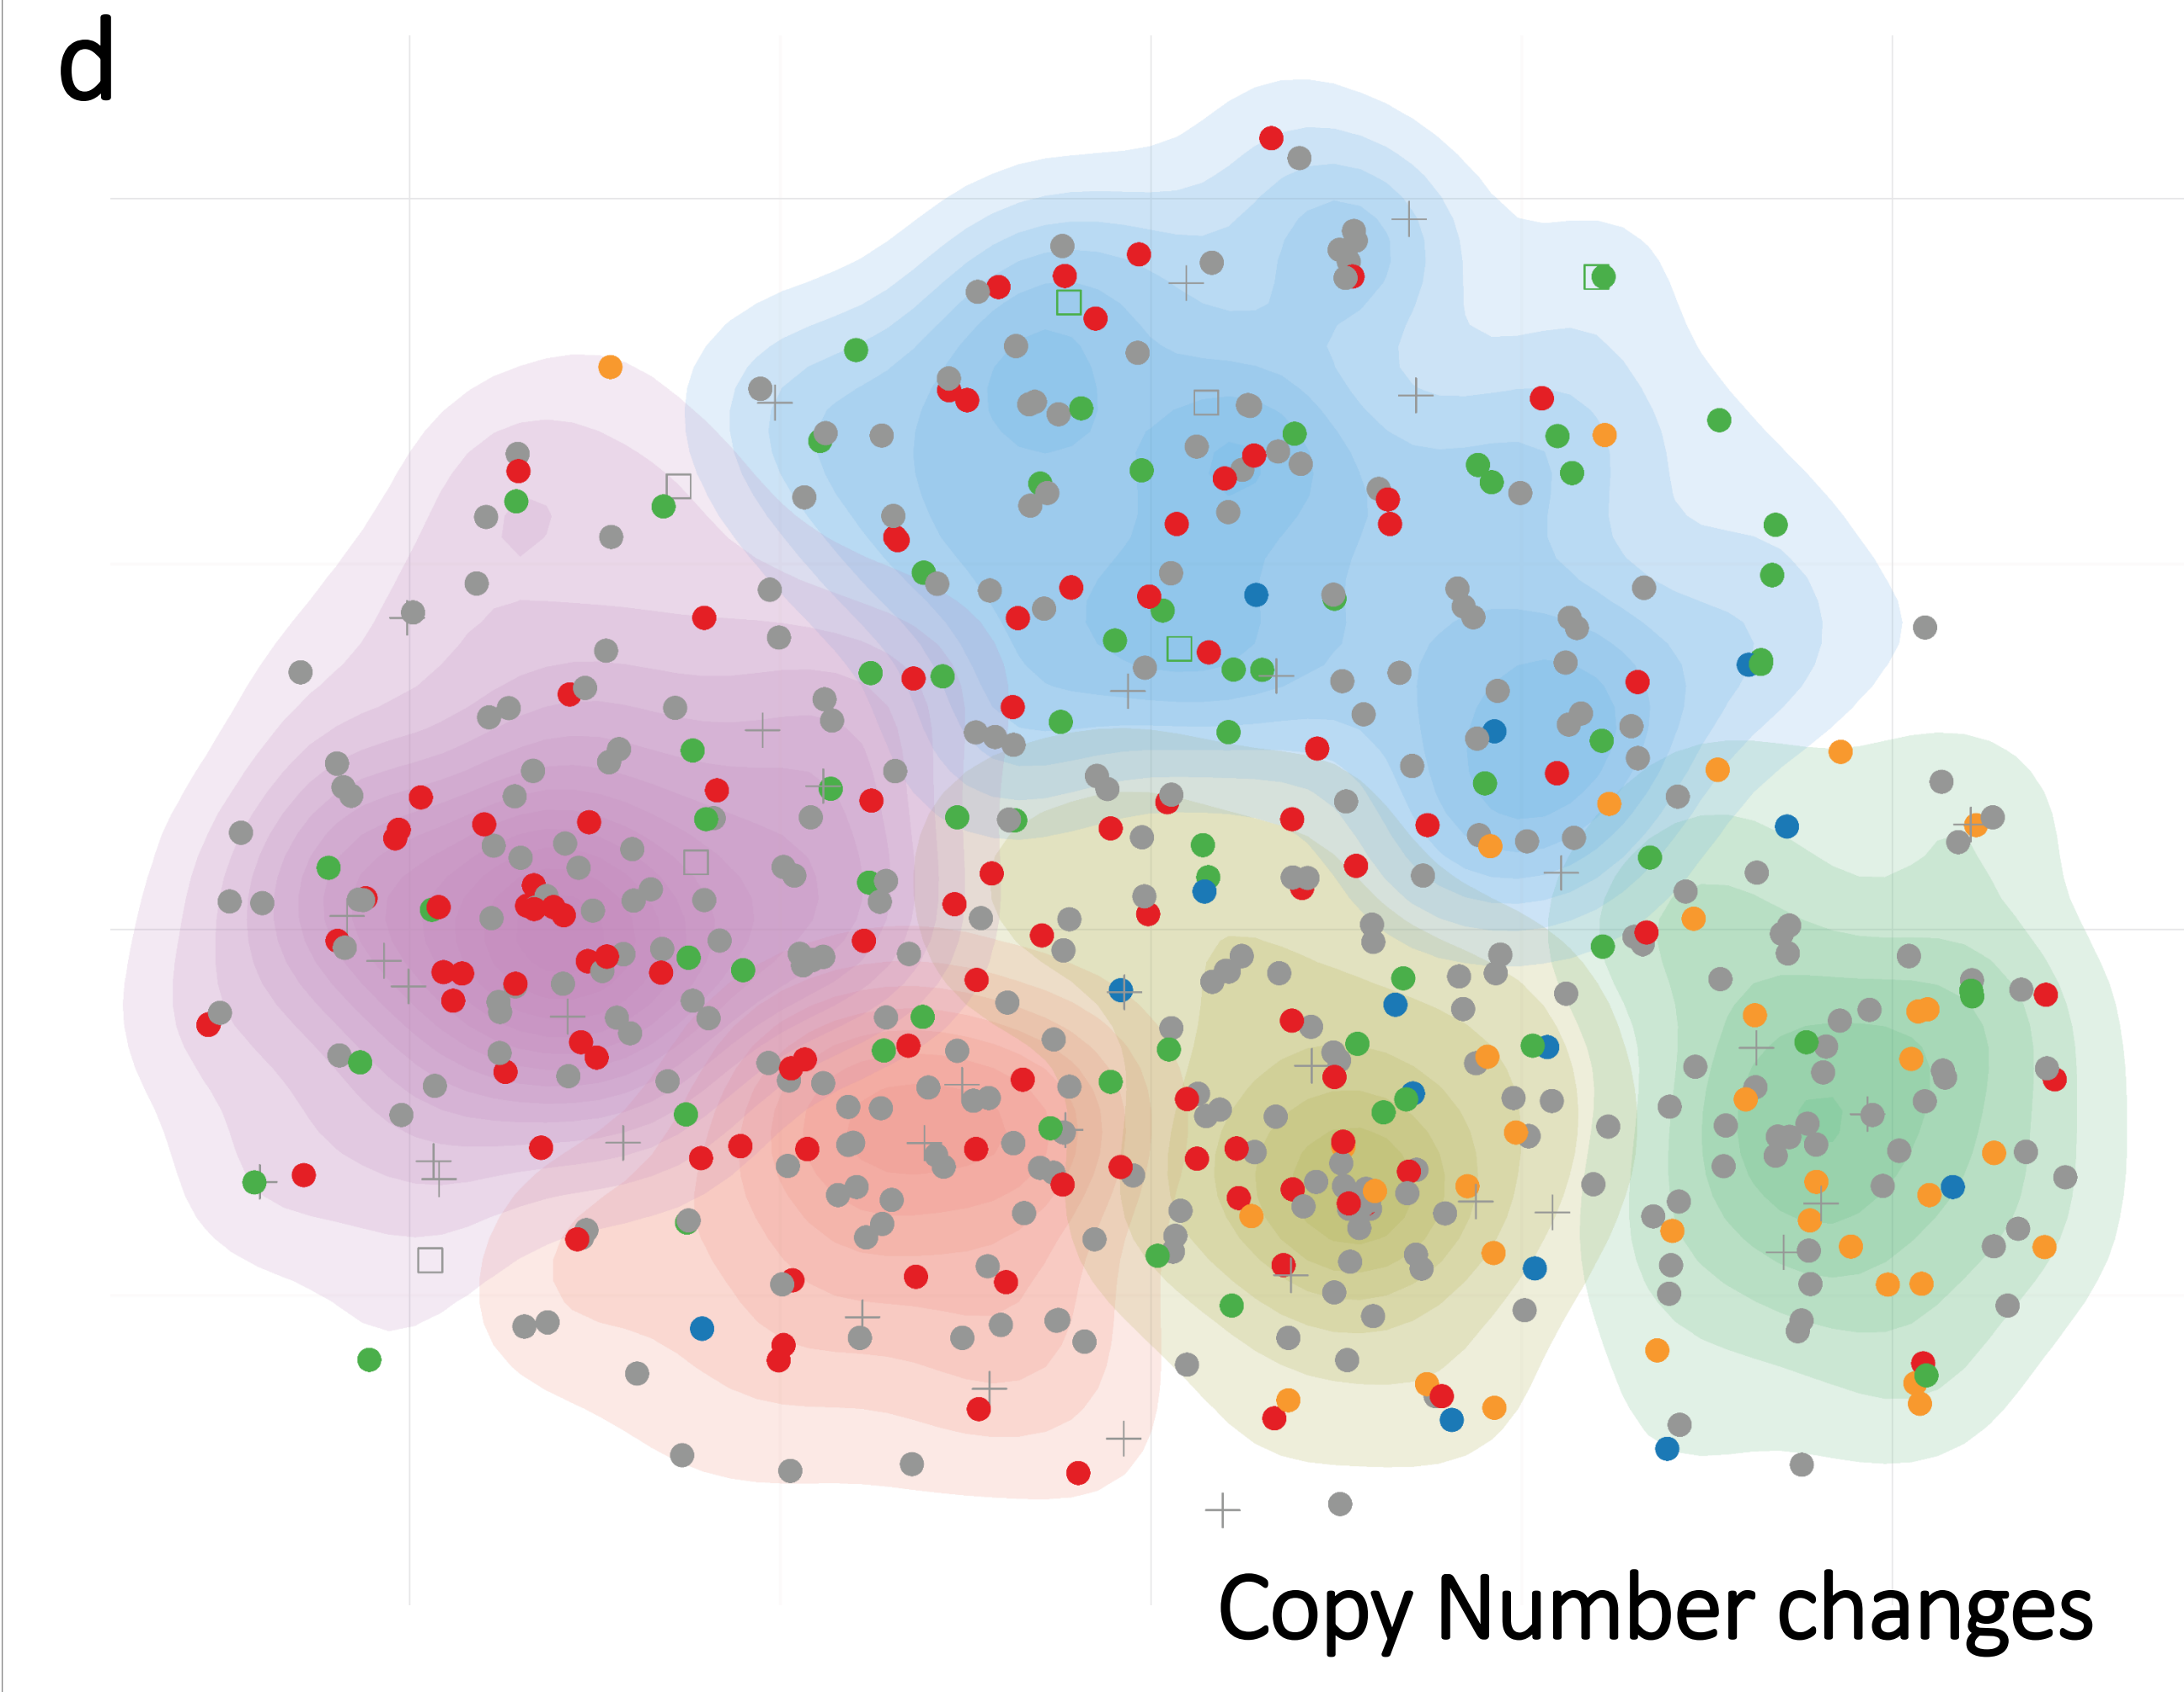

● Basal ● HER2-type ● Luminal A ● Luminal B ● Other/ Unknown Gender ○ Female □ Male ⊕ Unknown

Figure S8

a

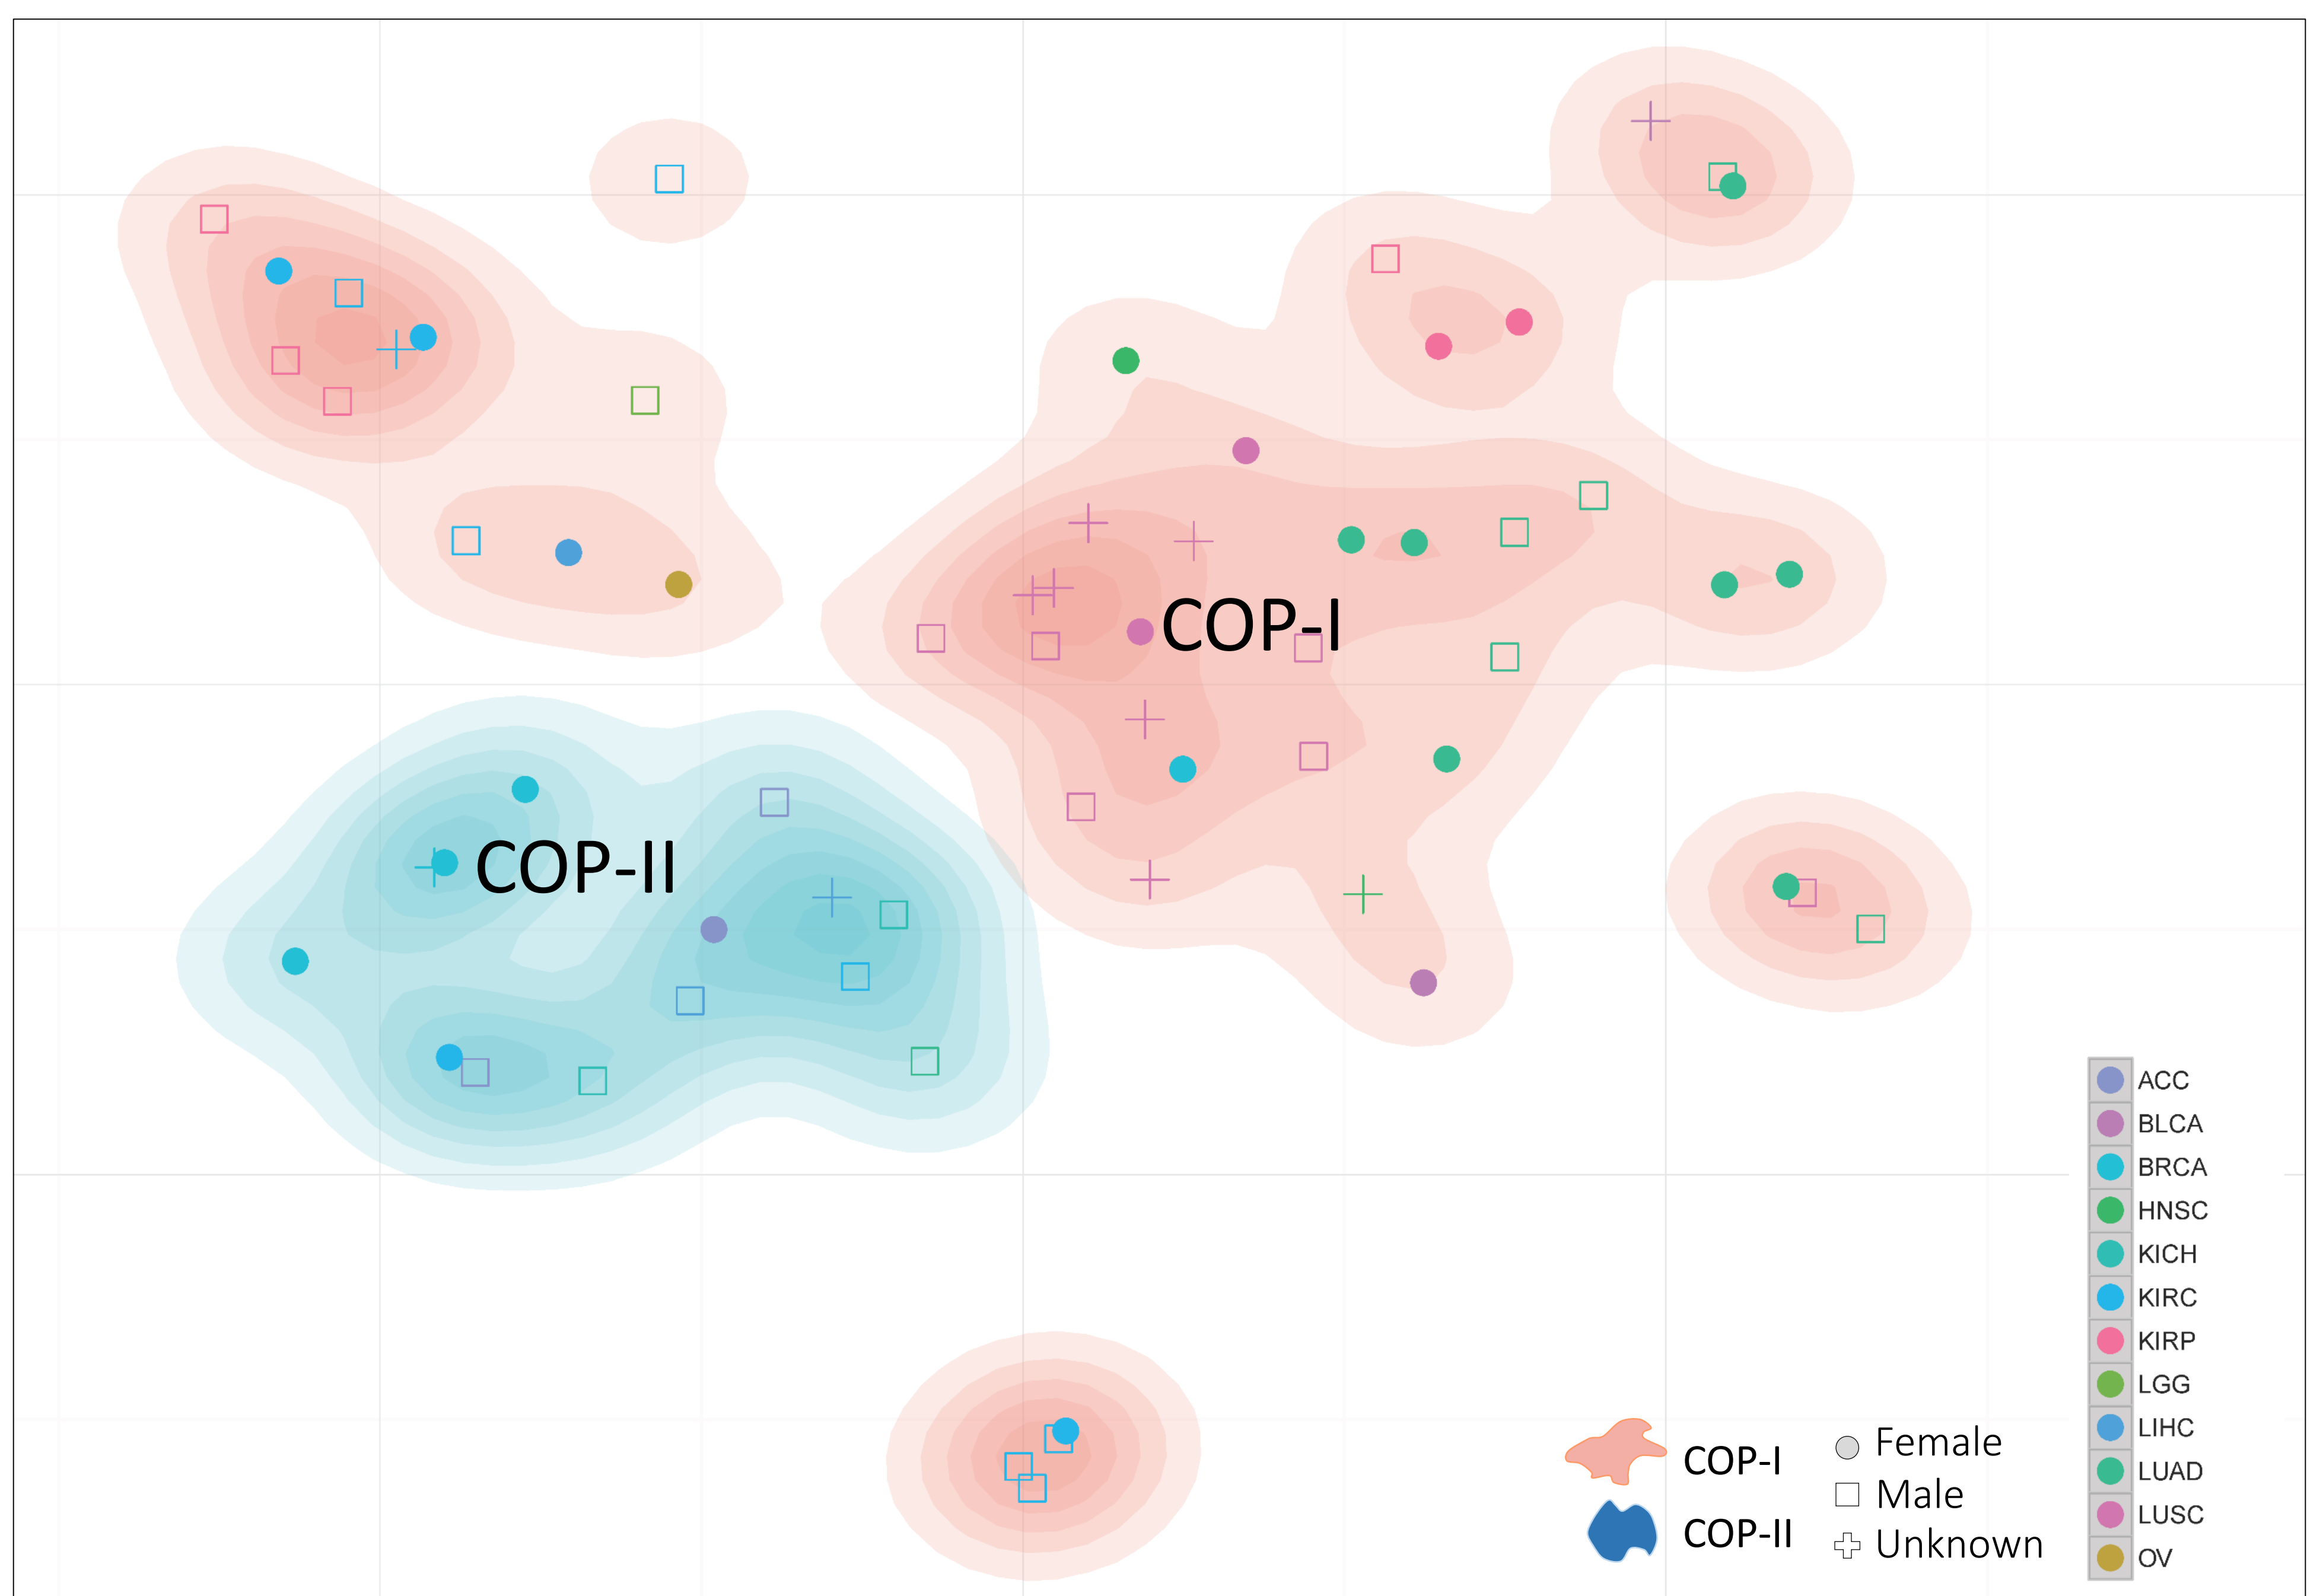

b

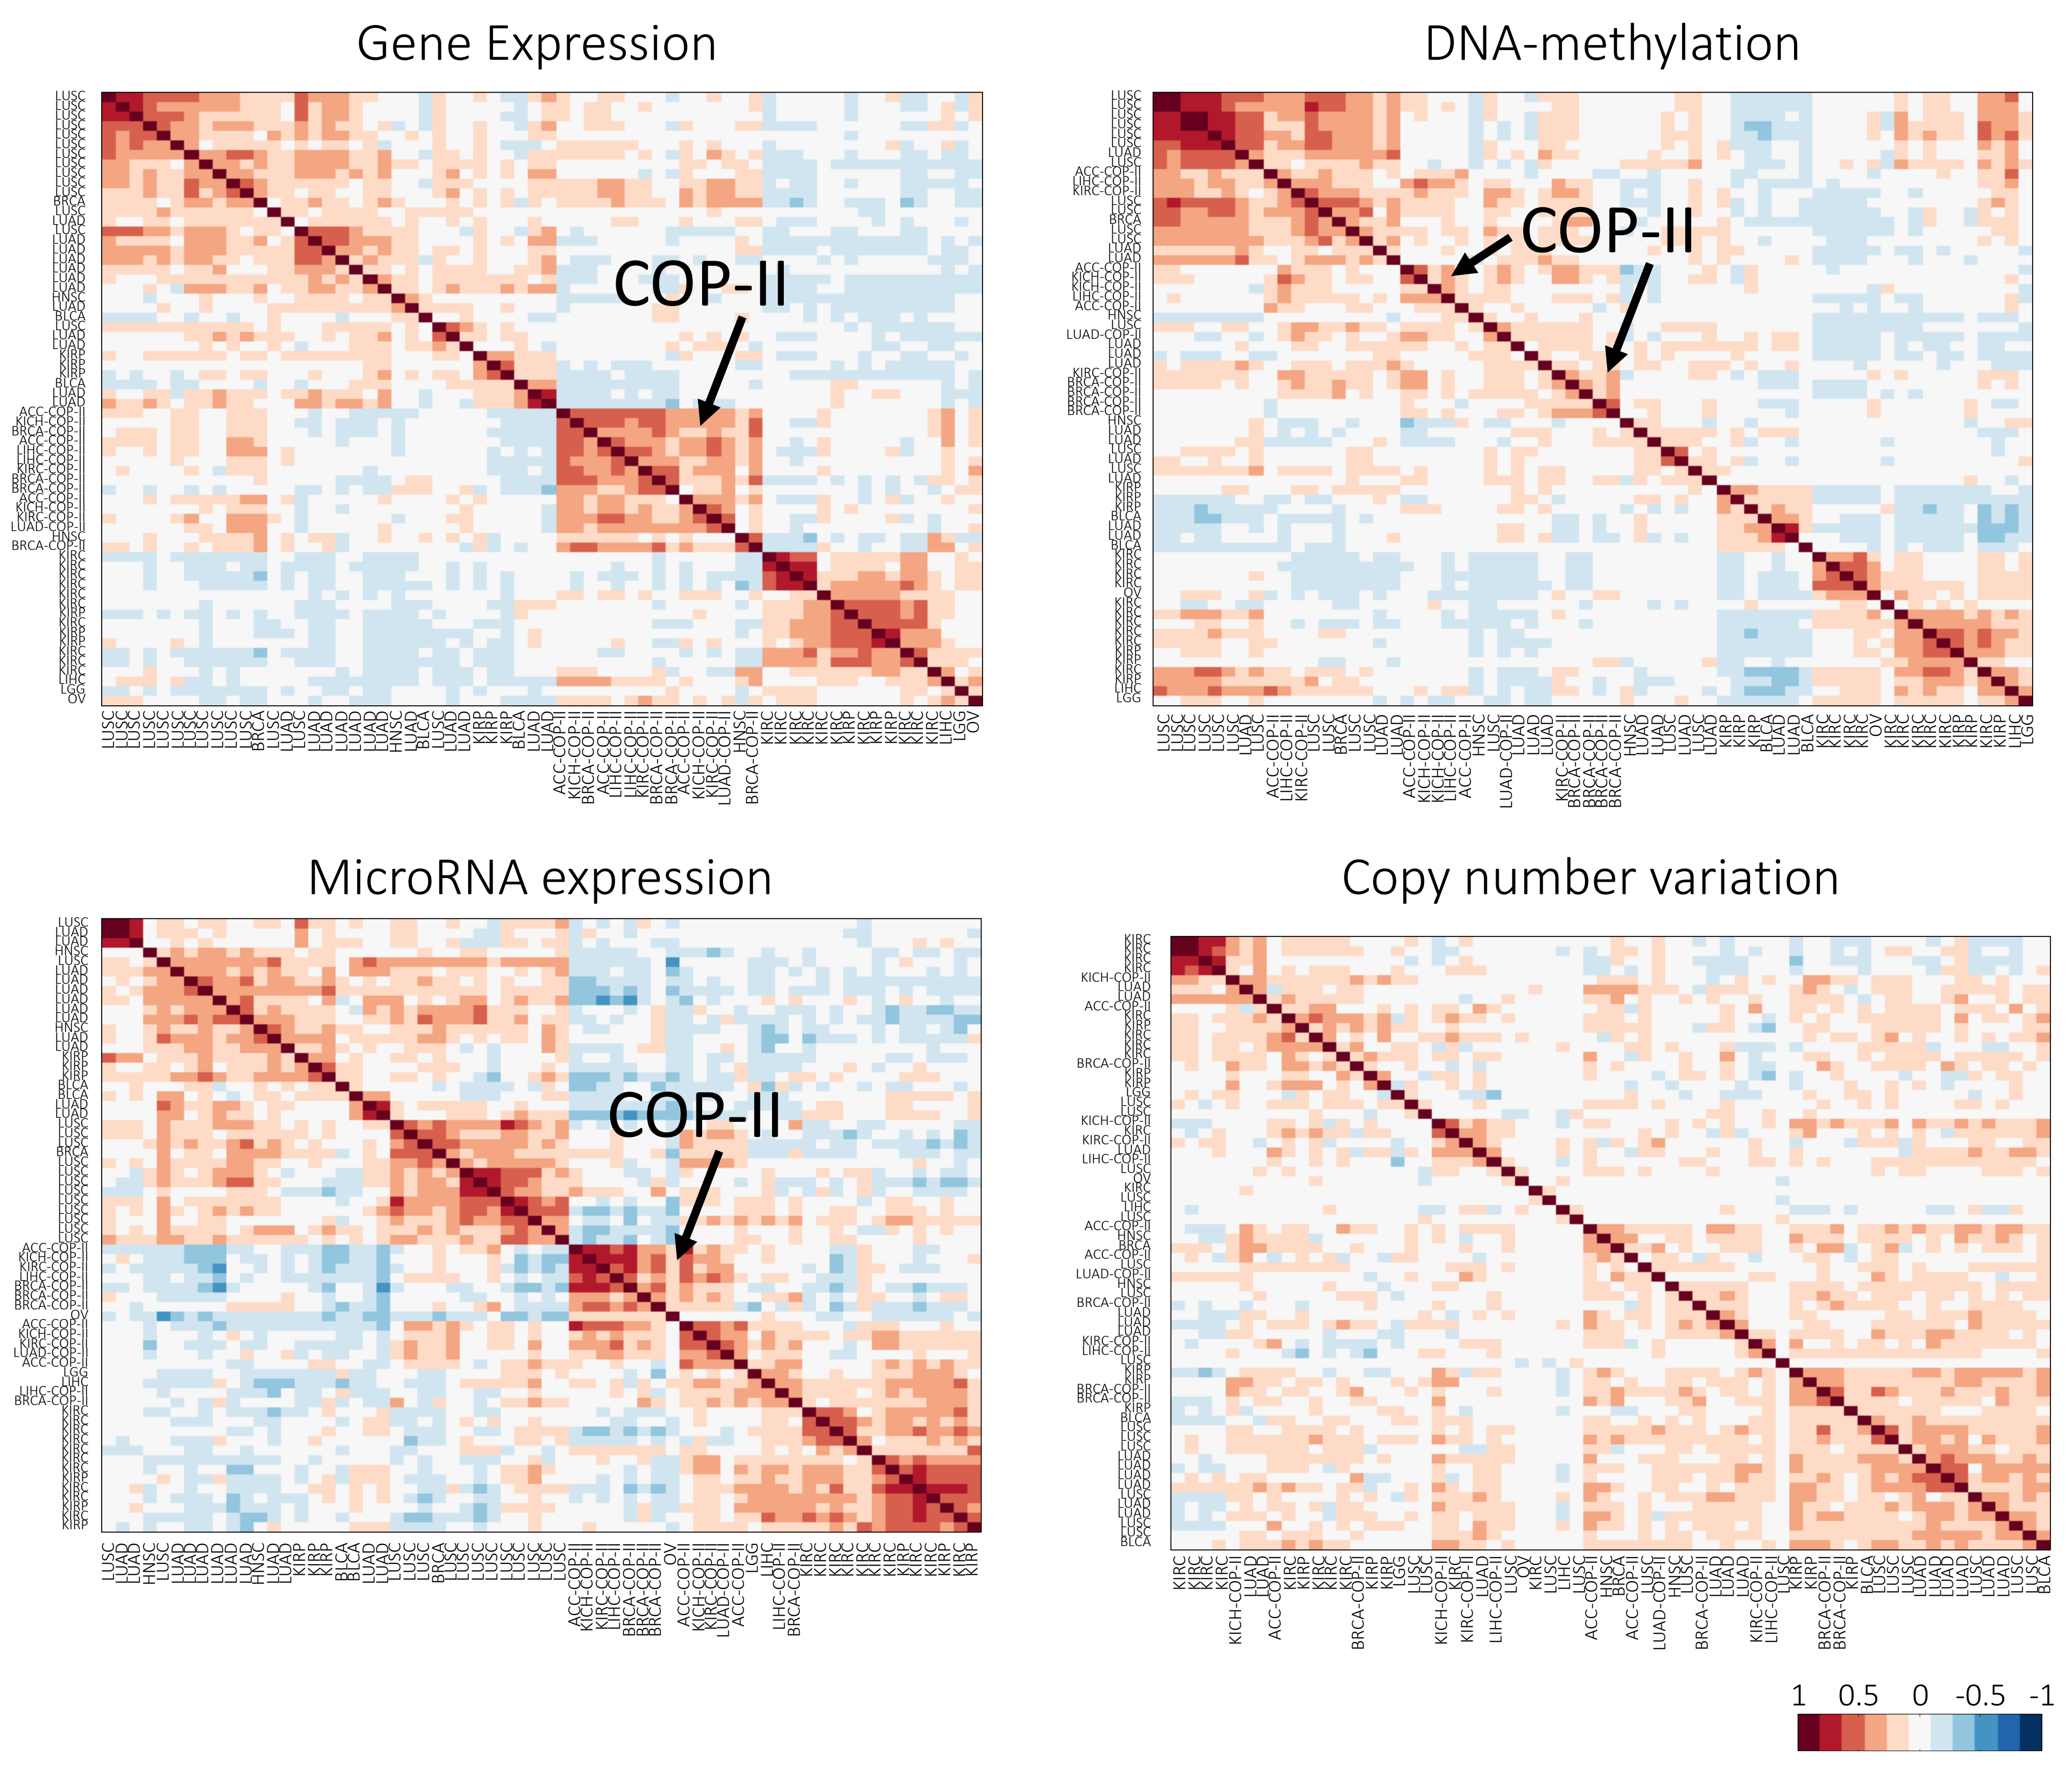

Figure S9

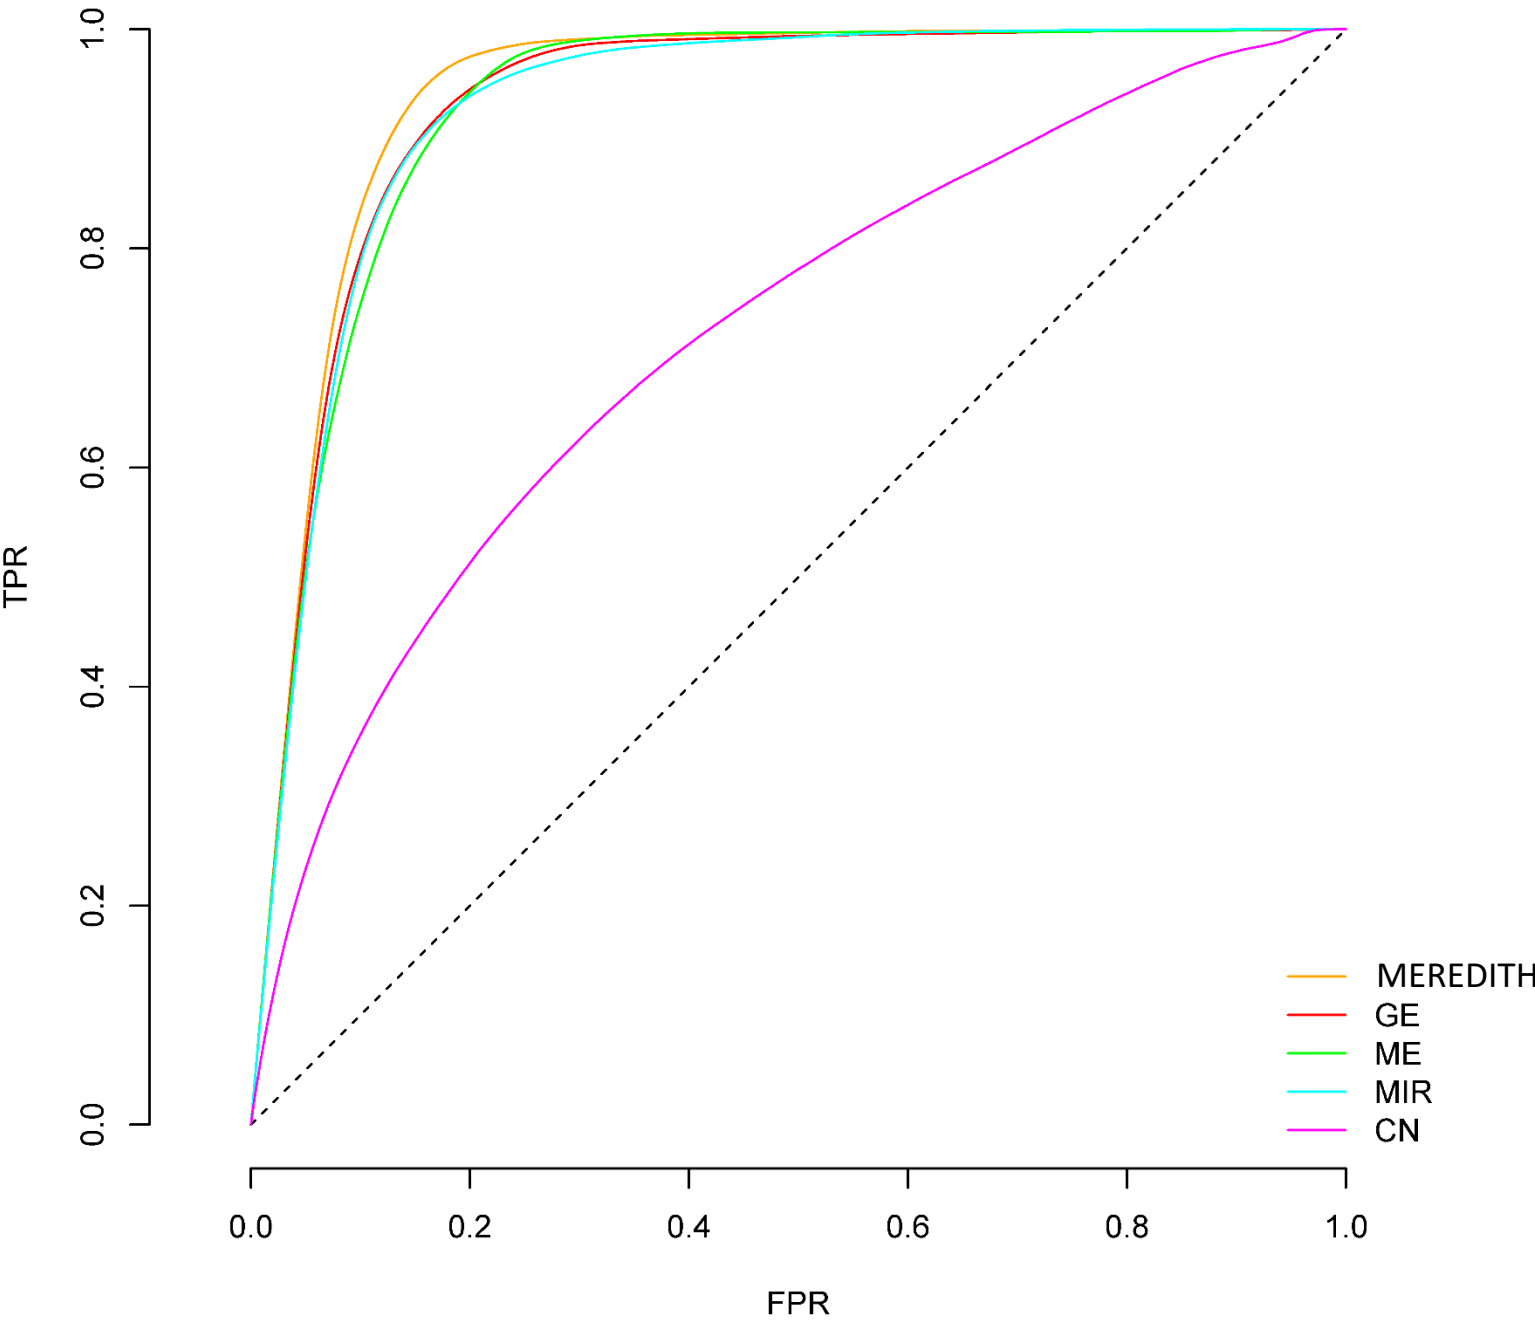

Figure S10

**a**

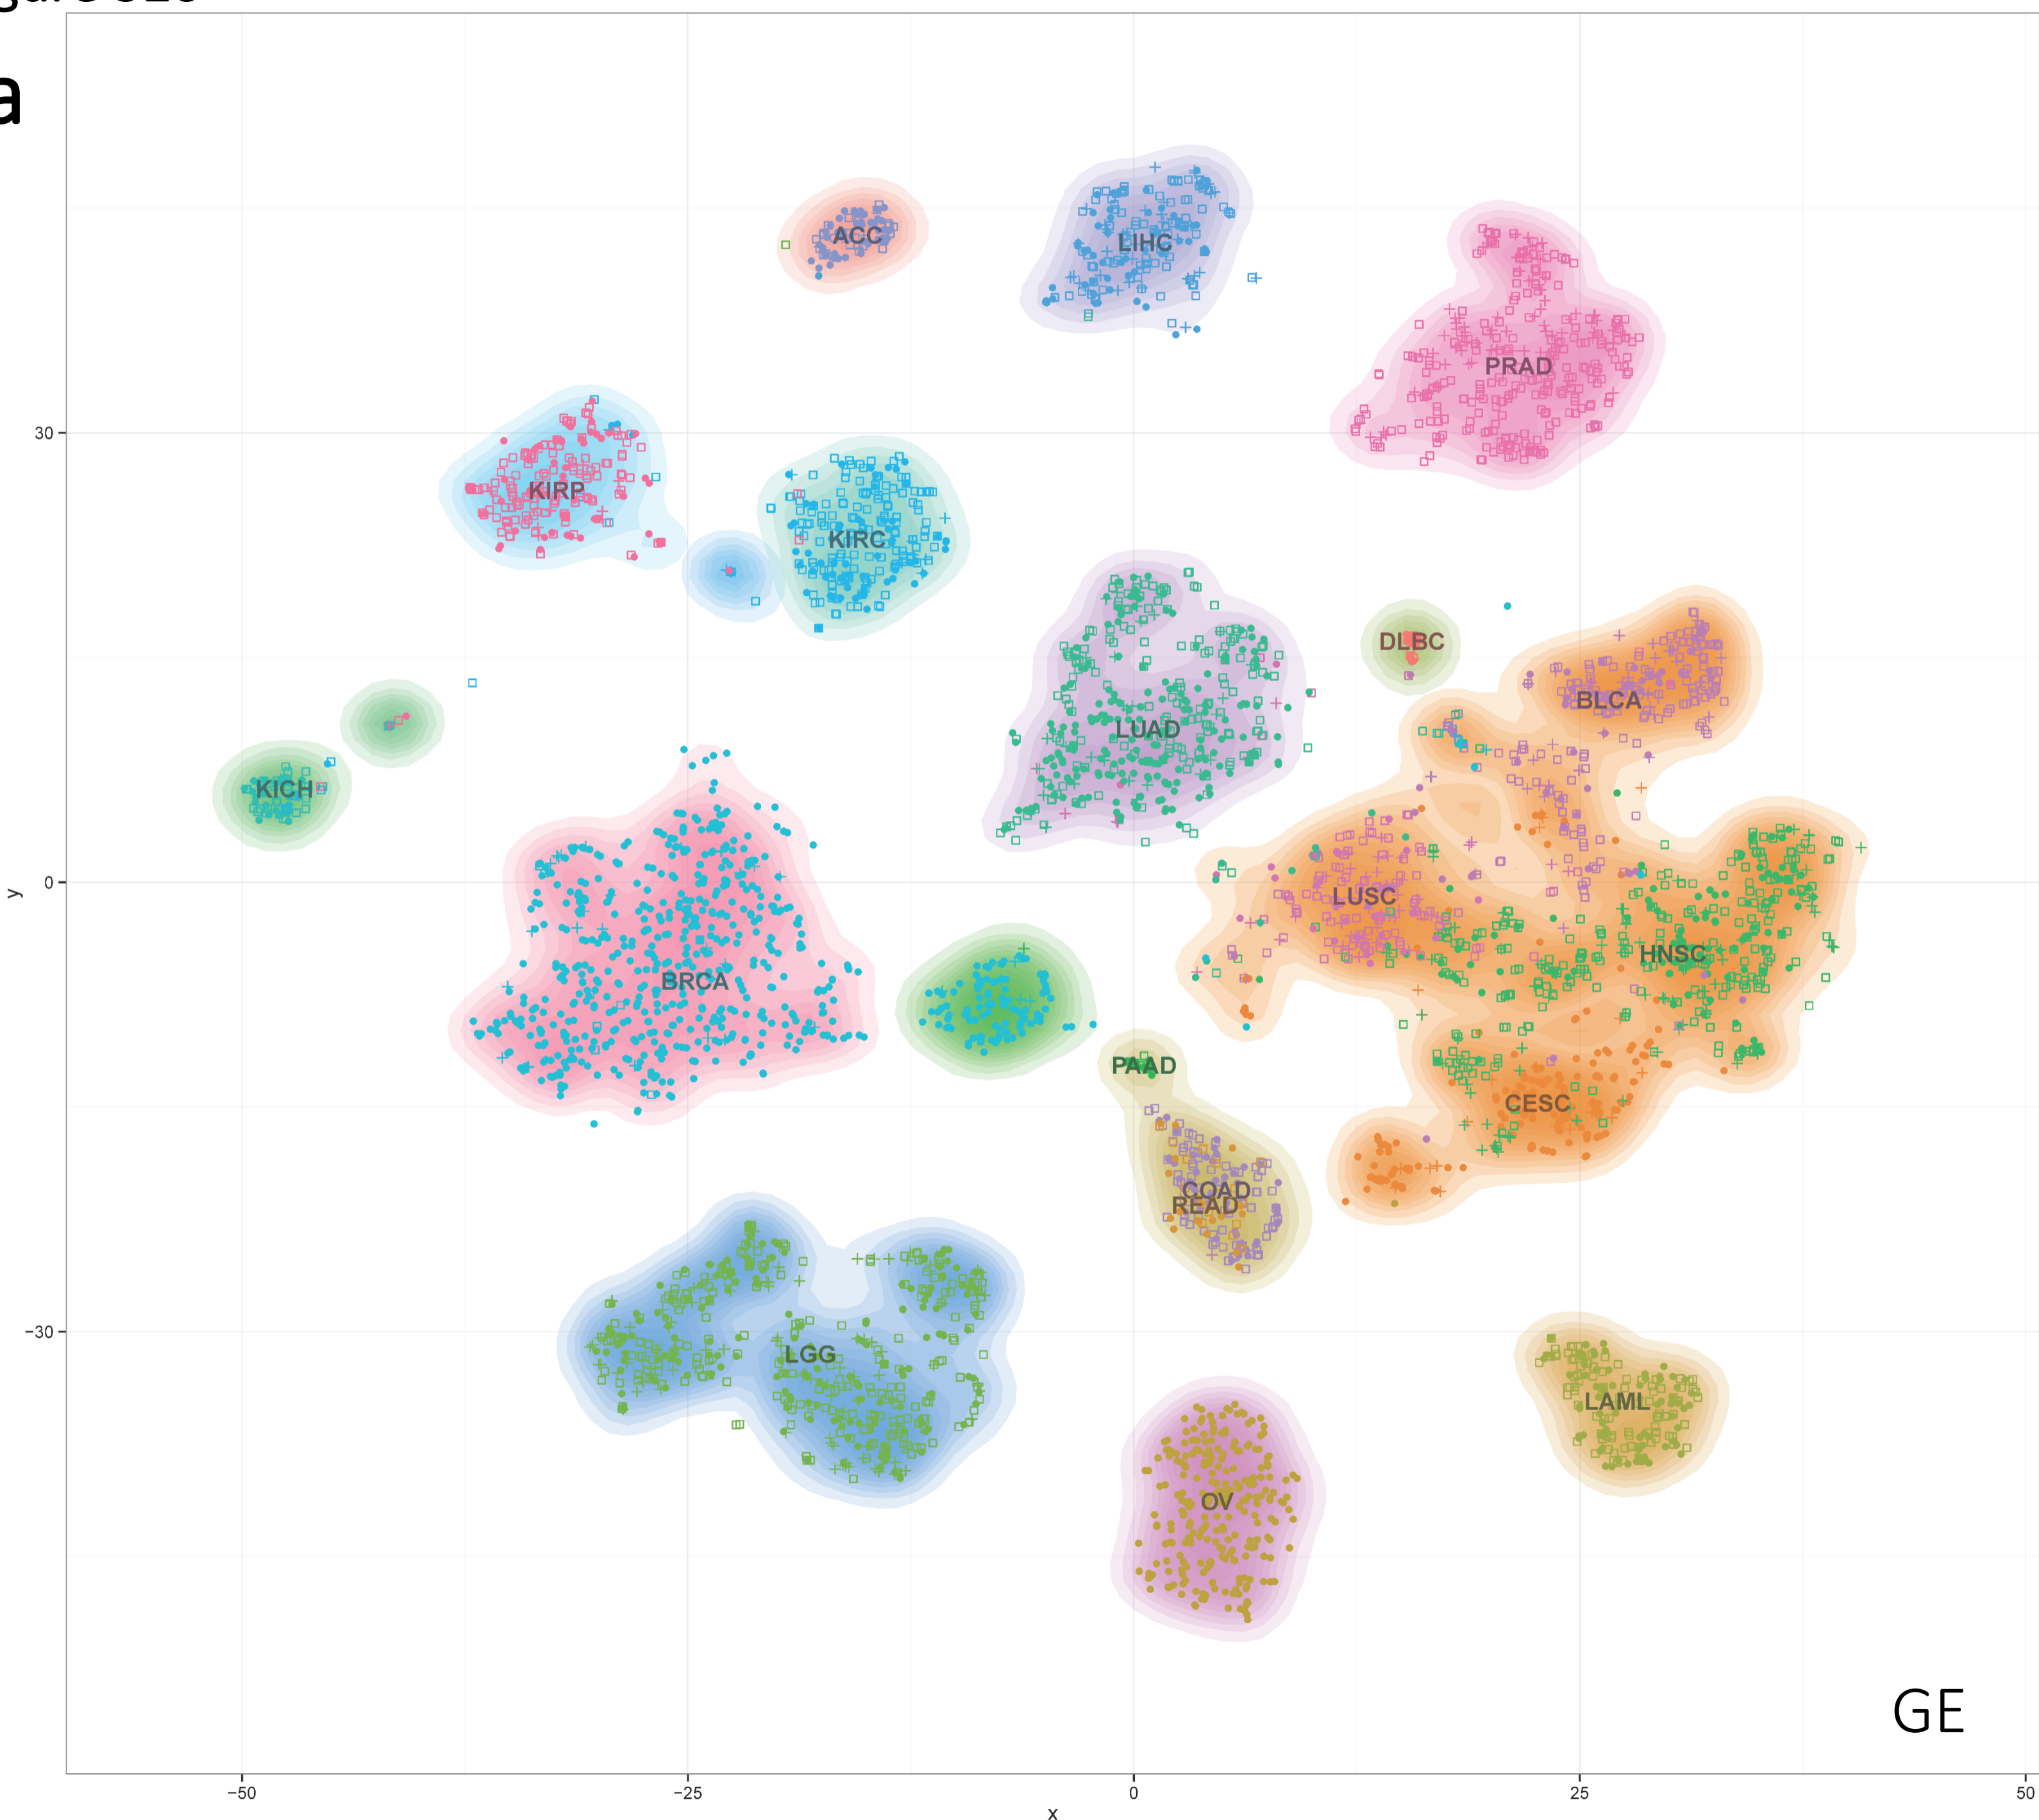

**b**

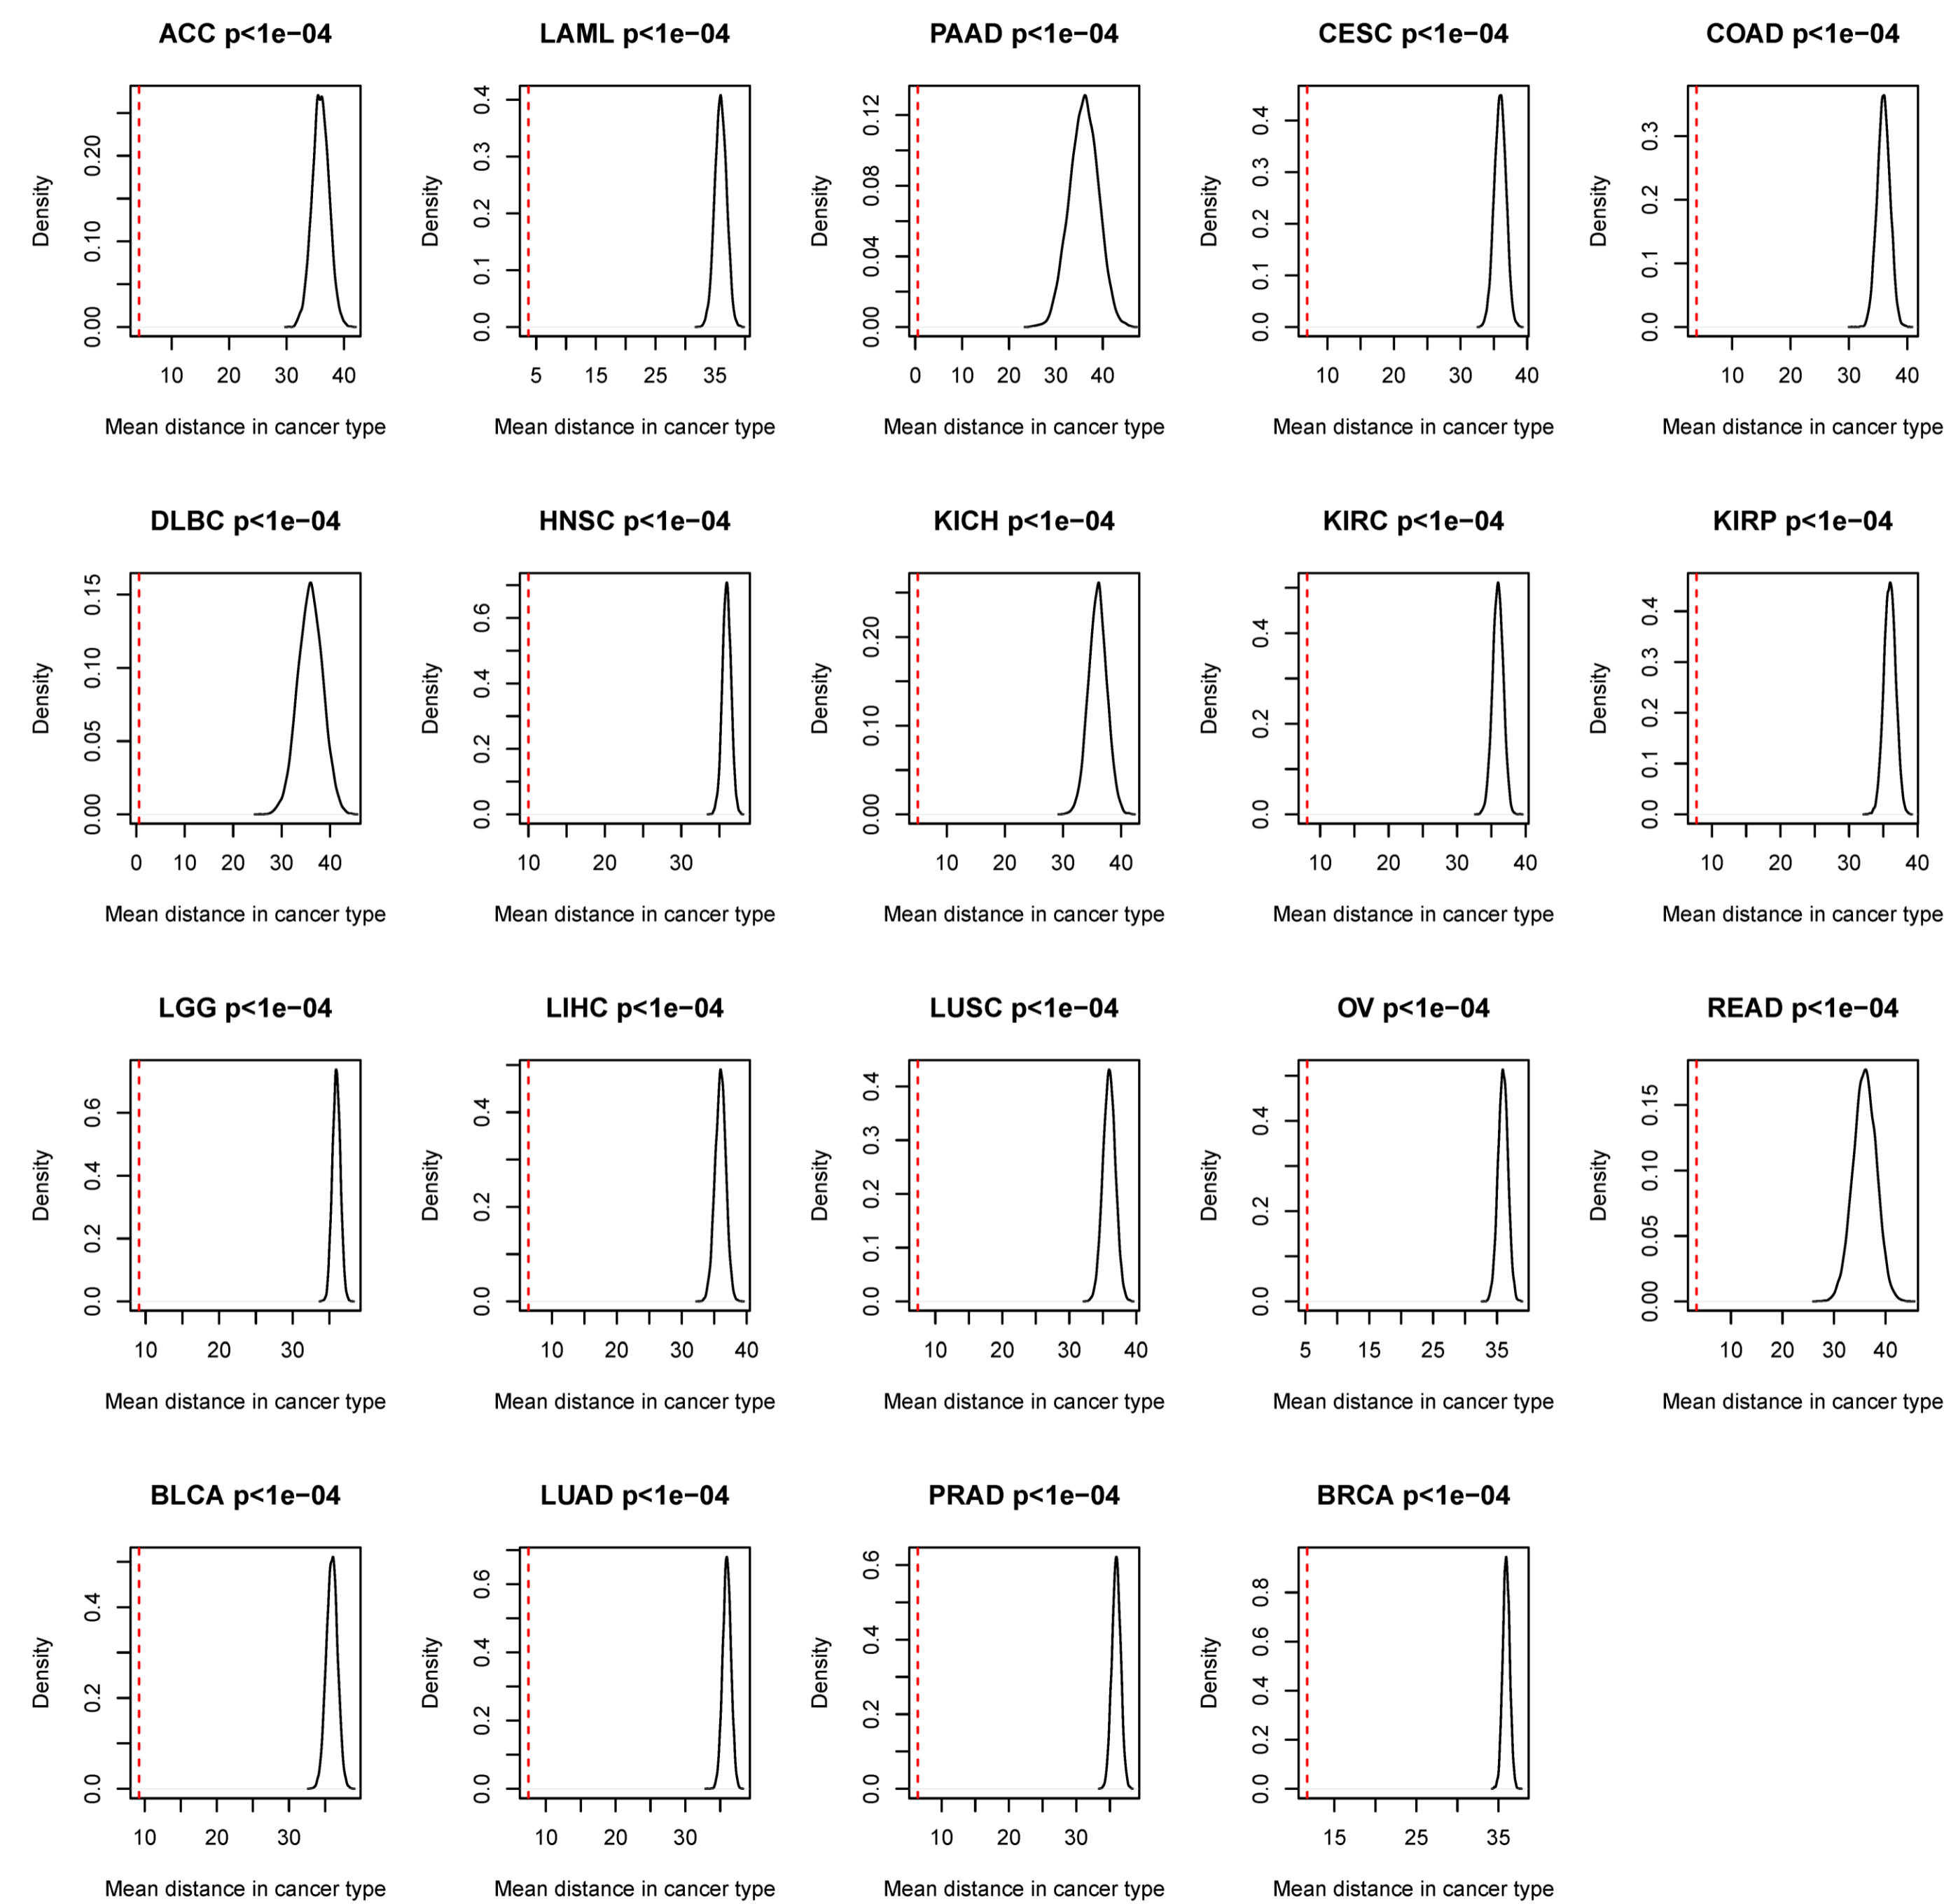

Figure S11

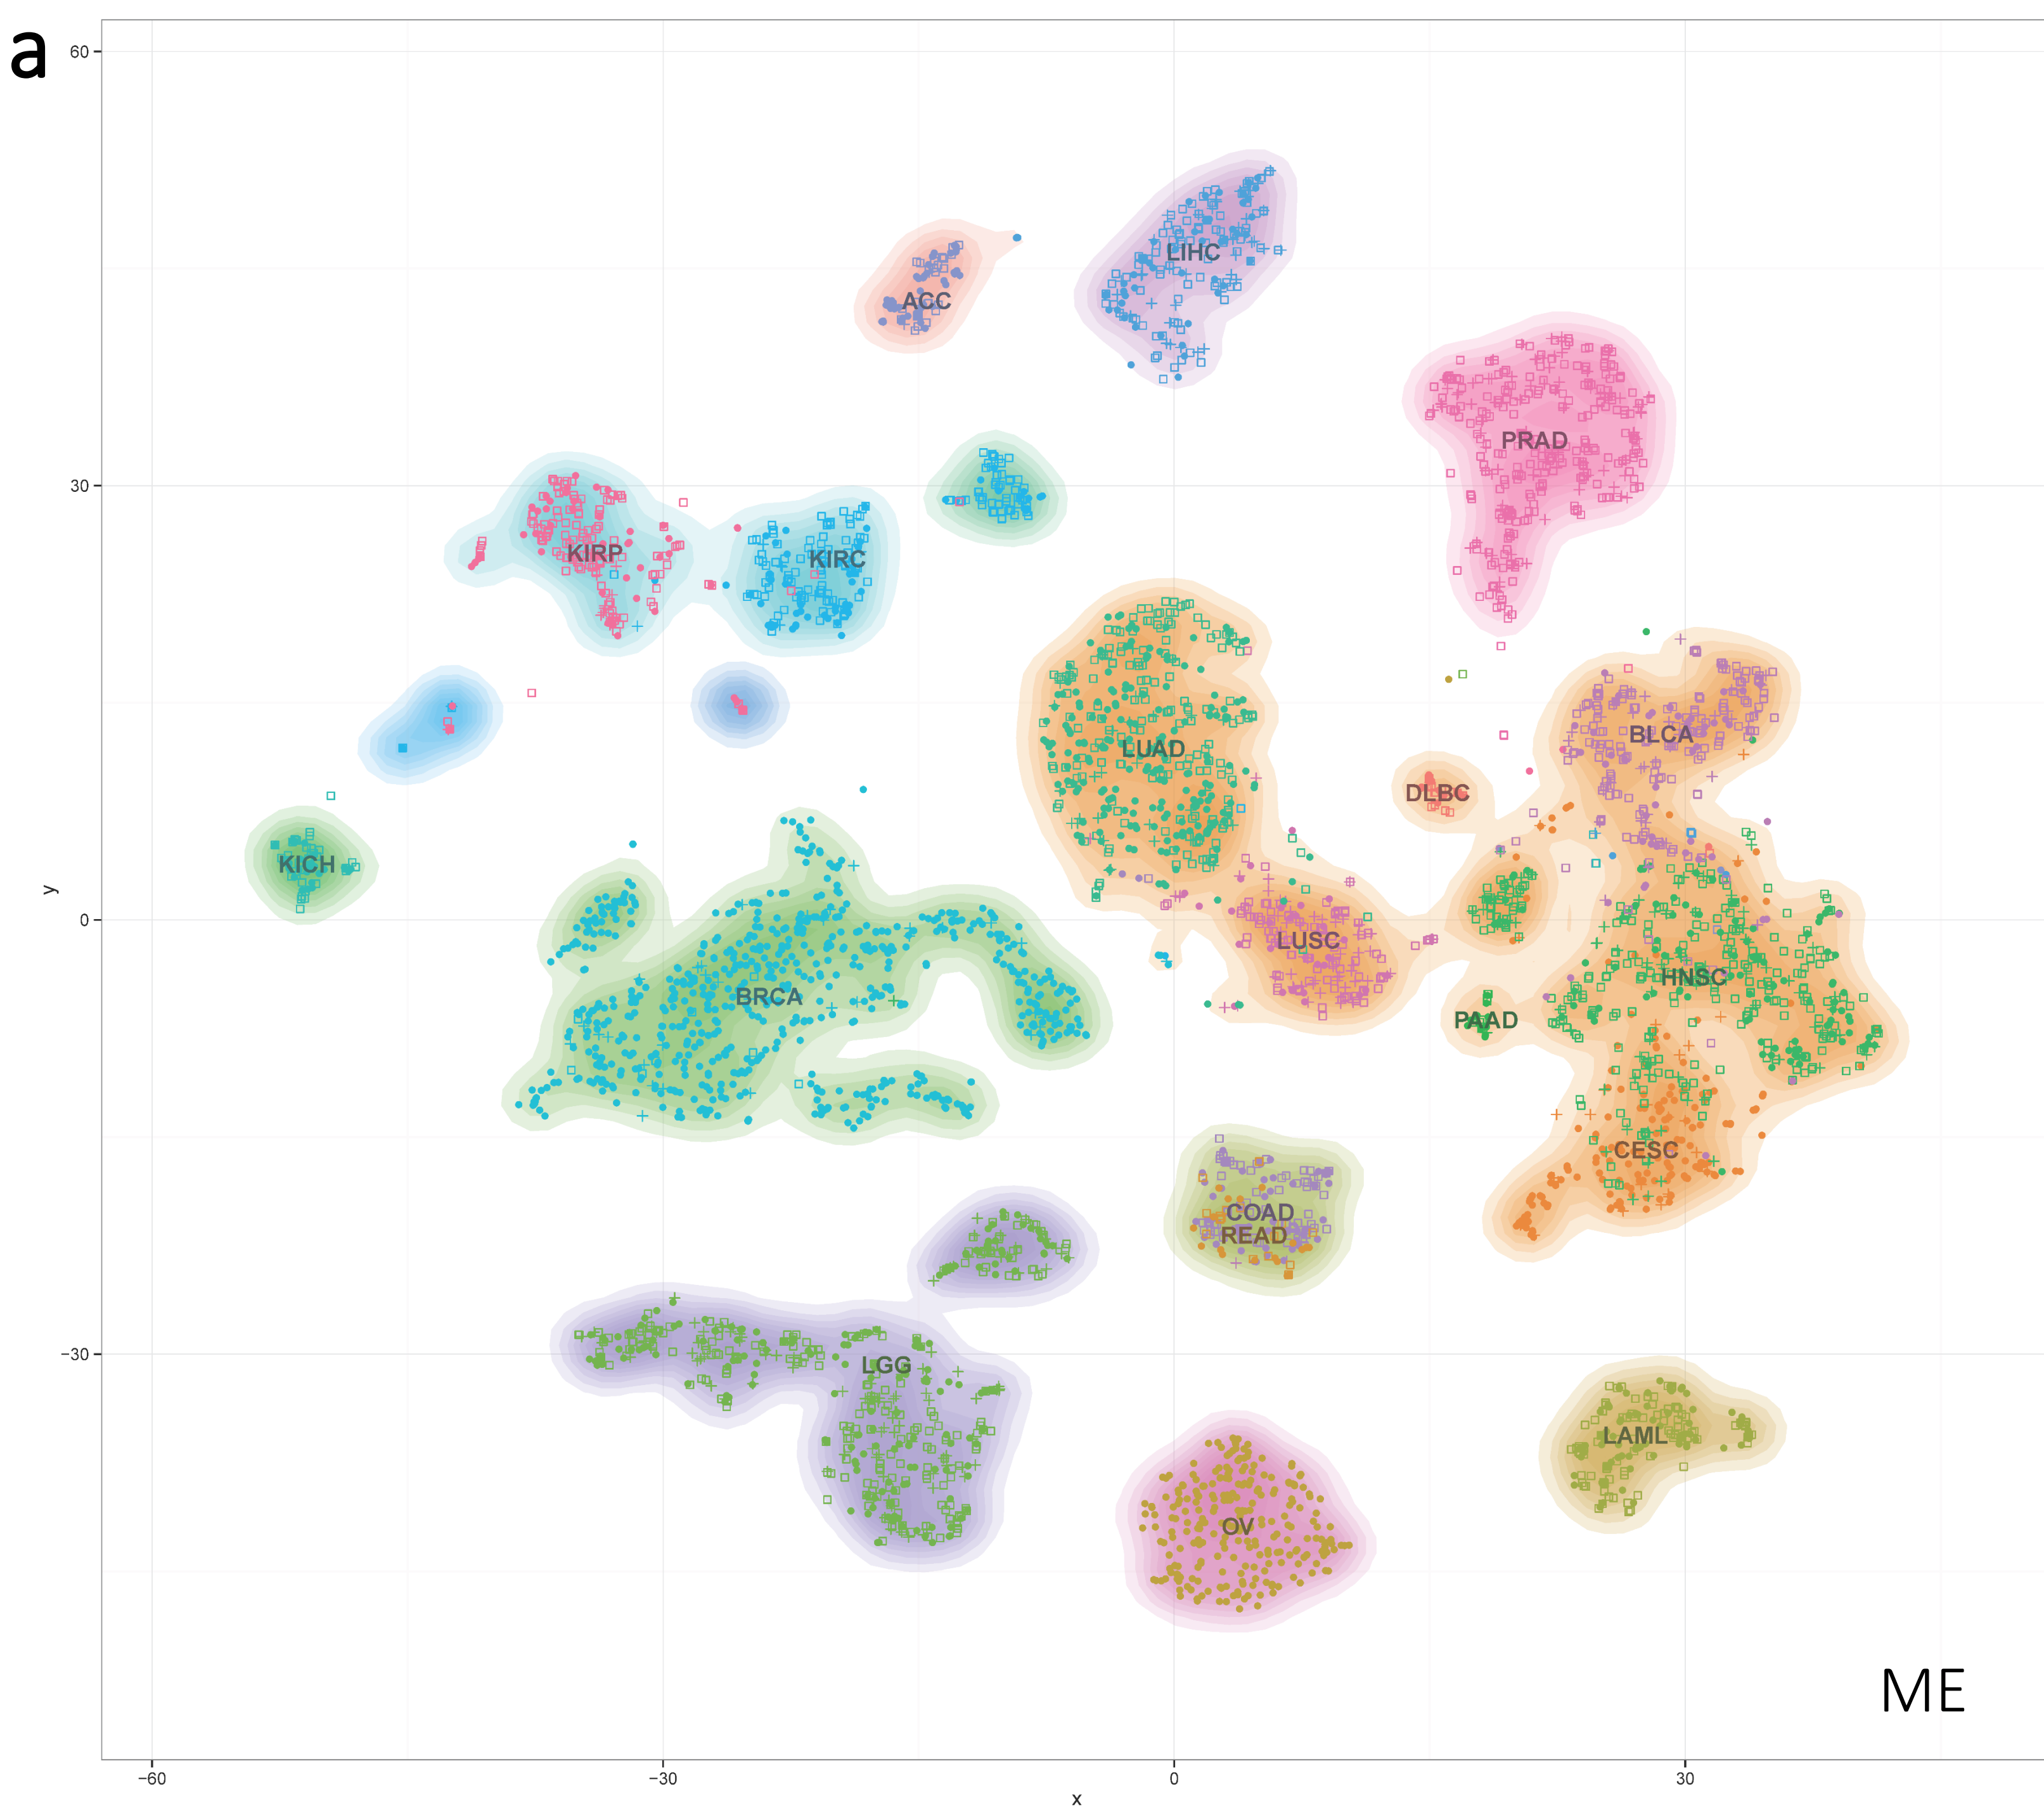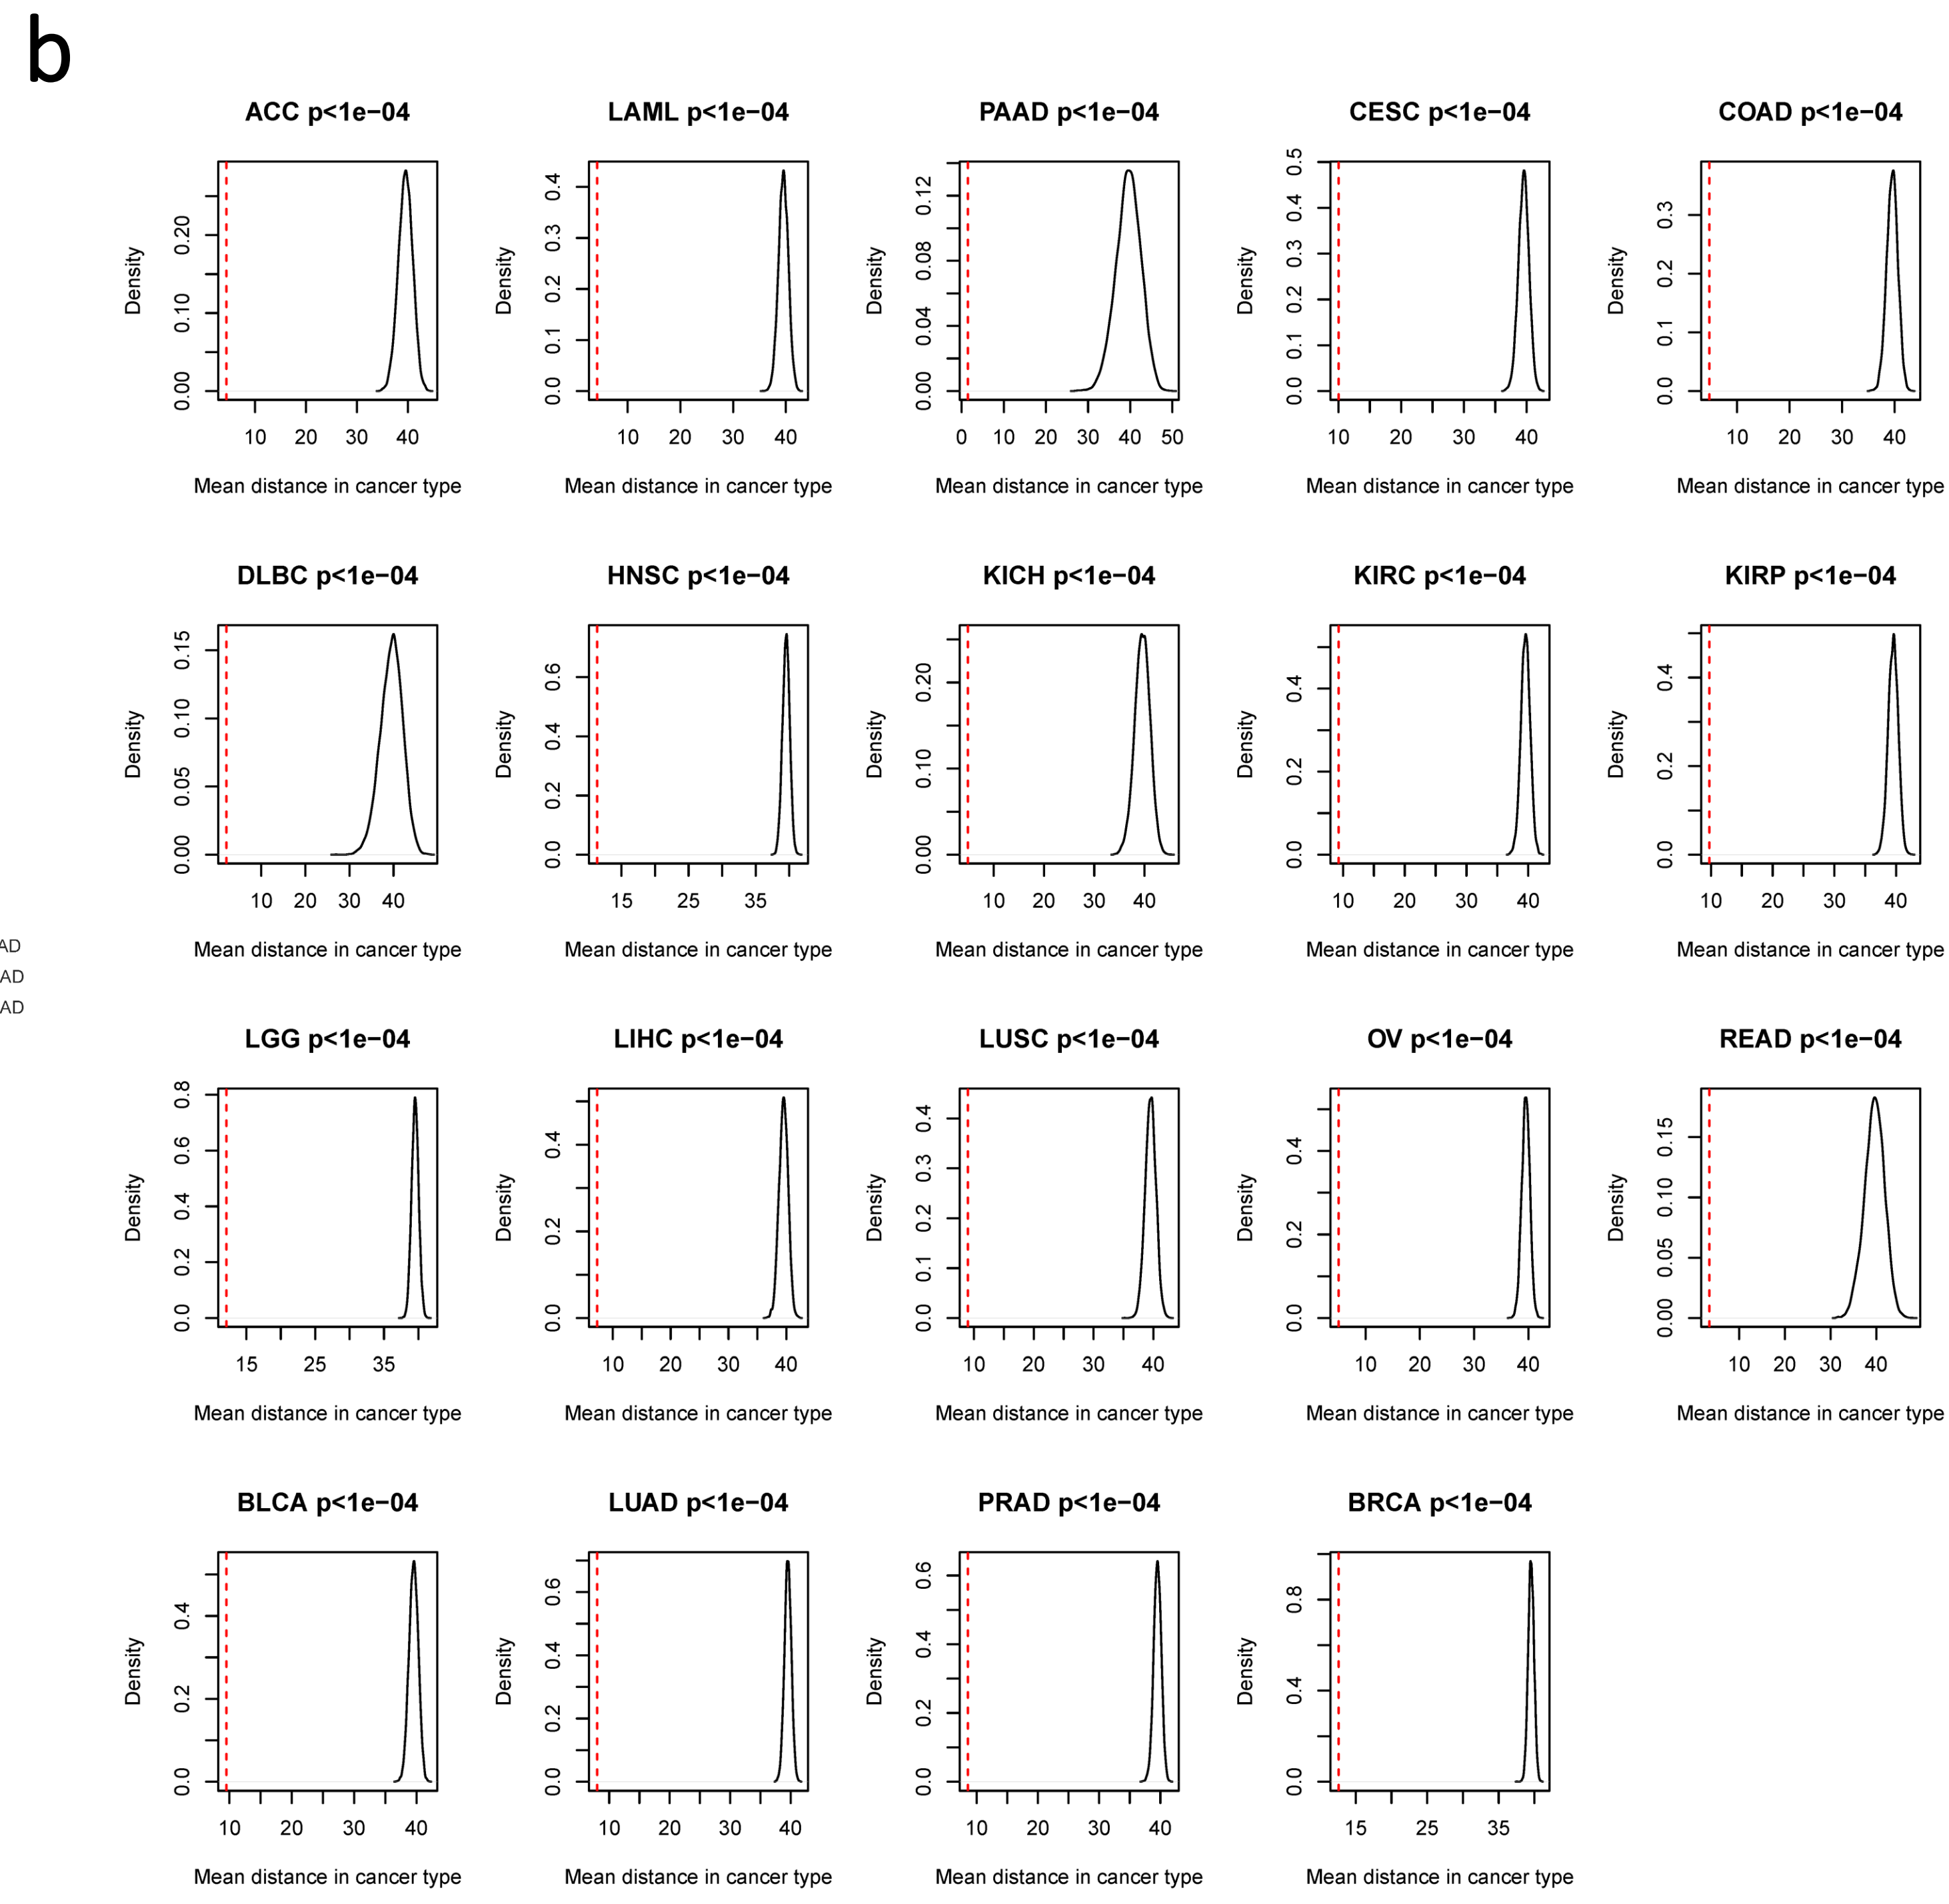

Figure S12

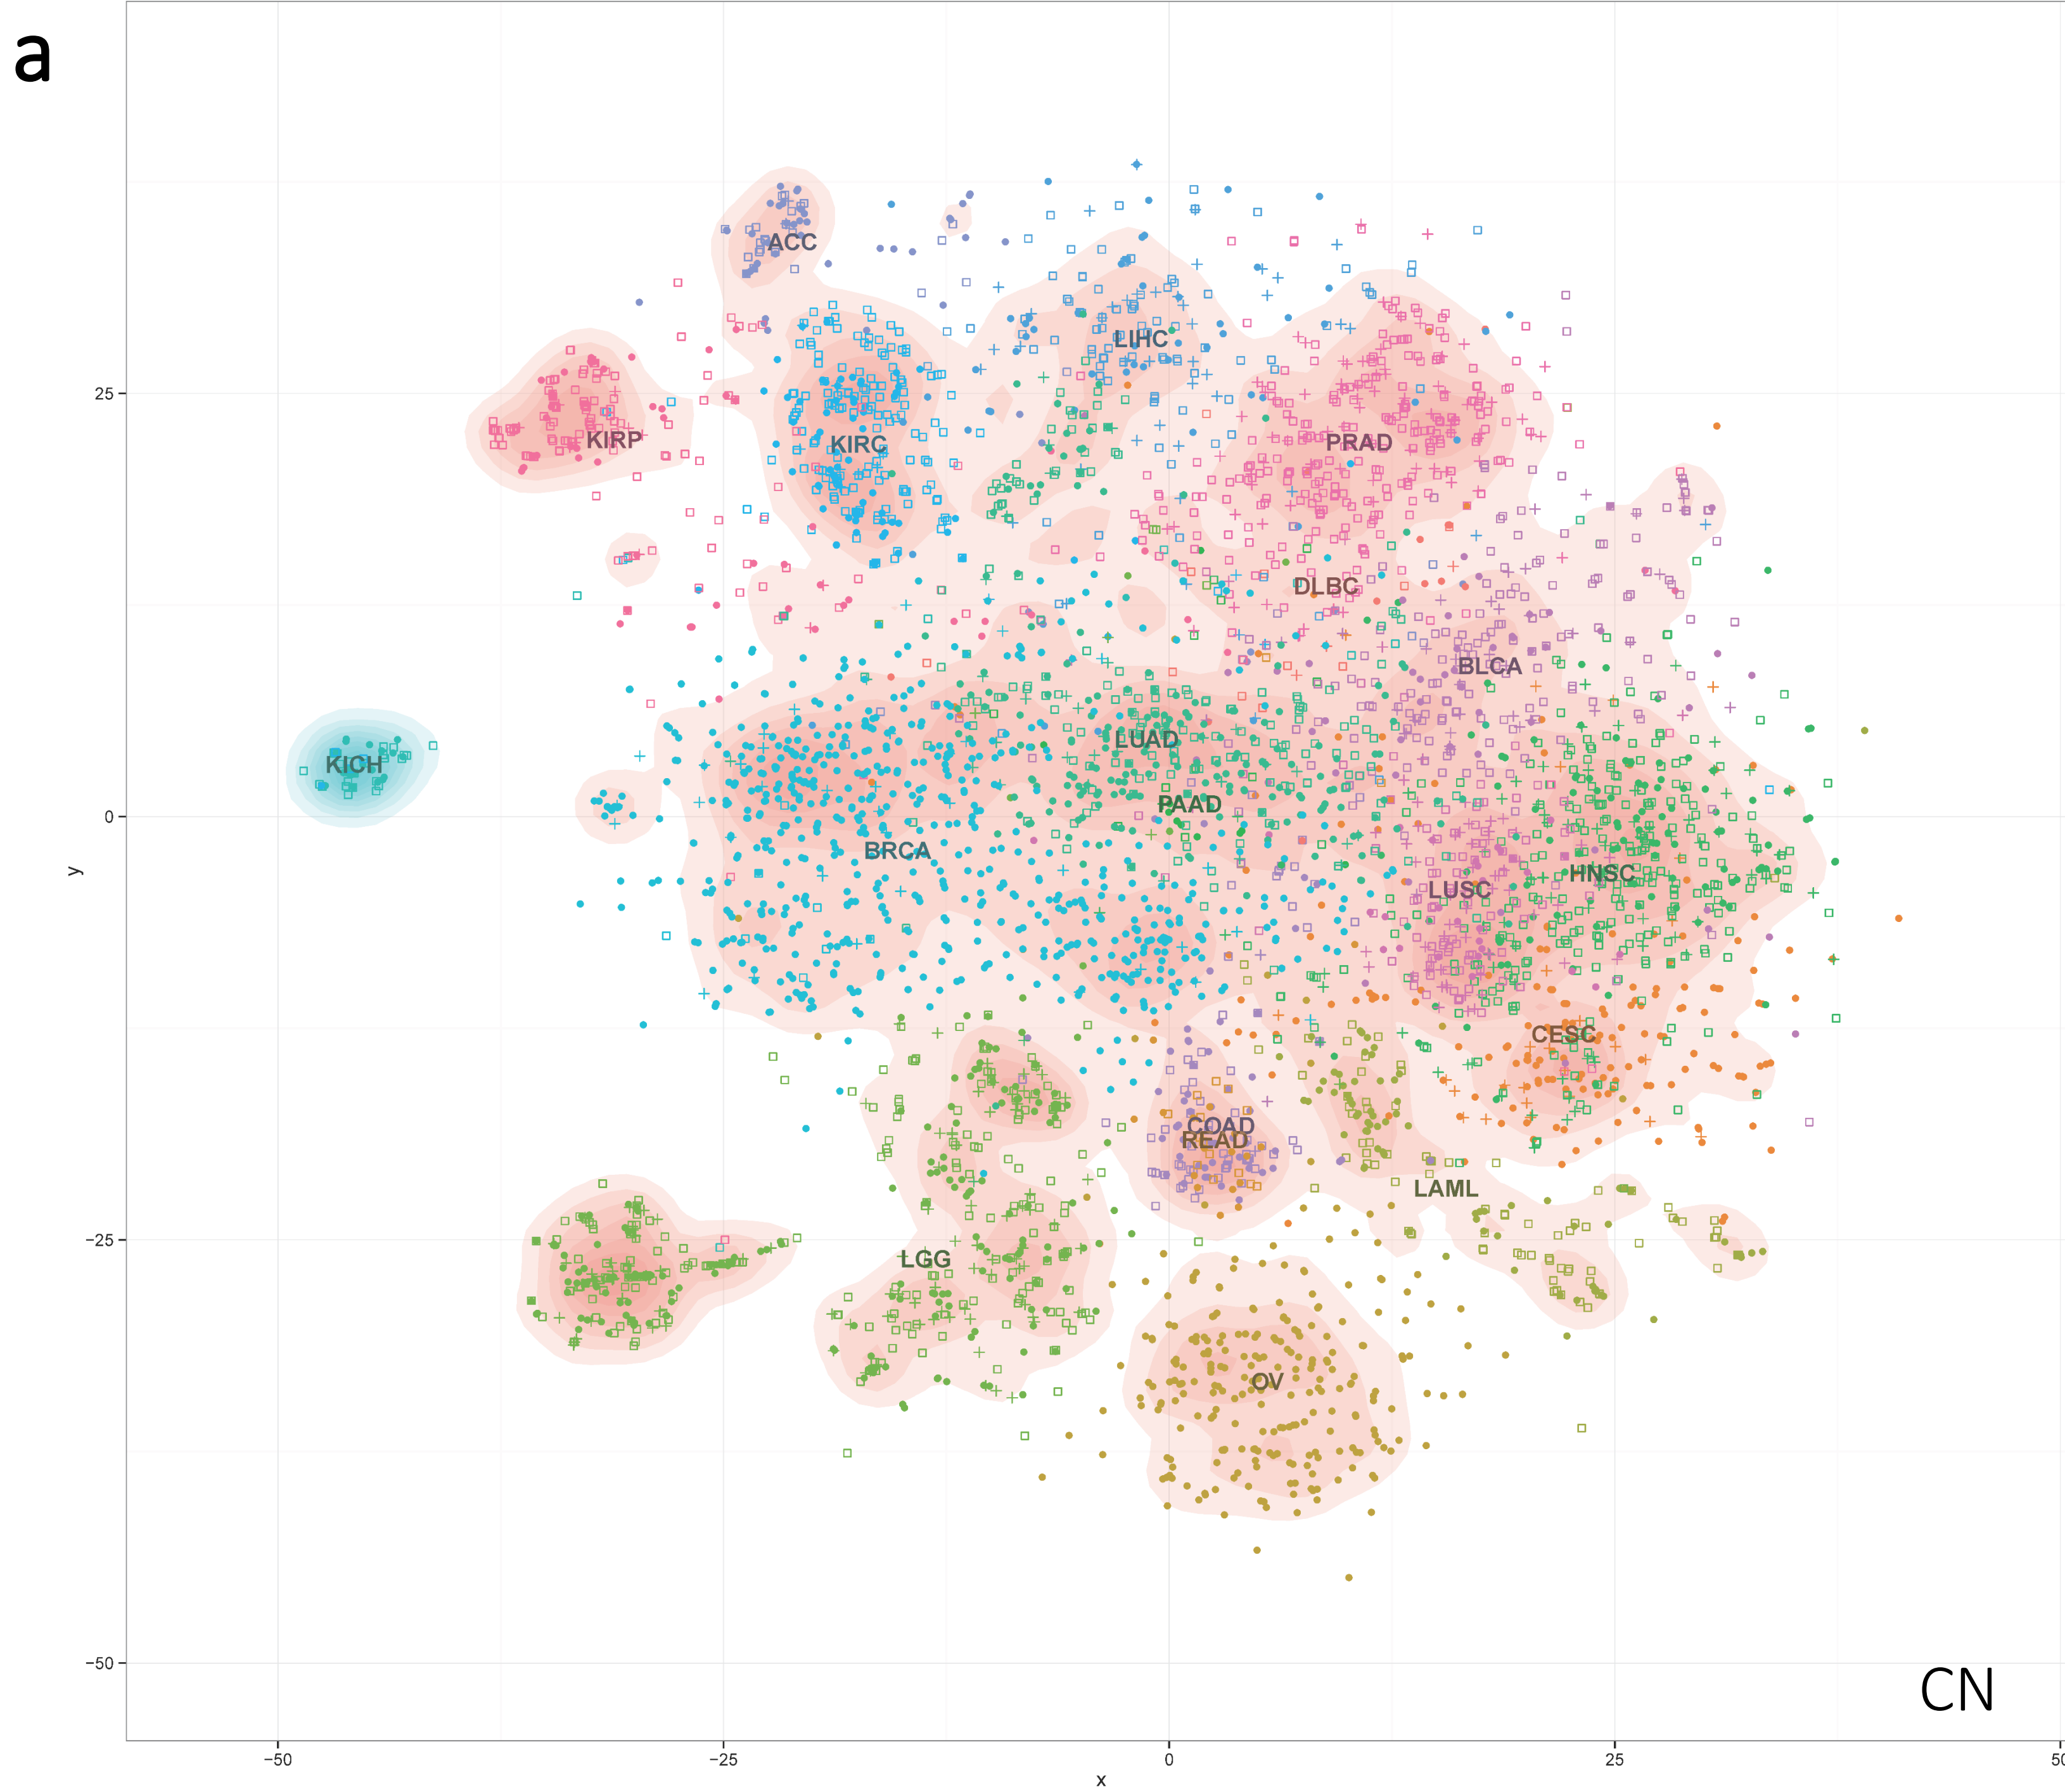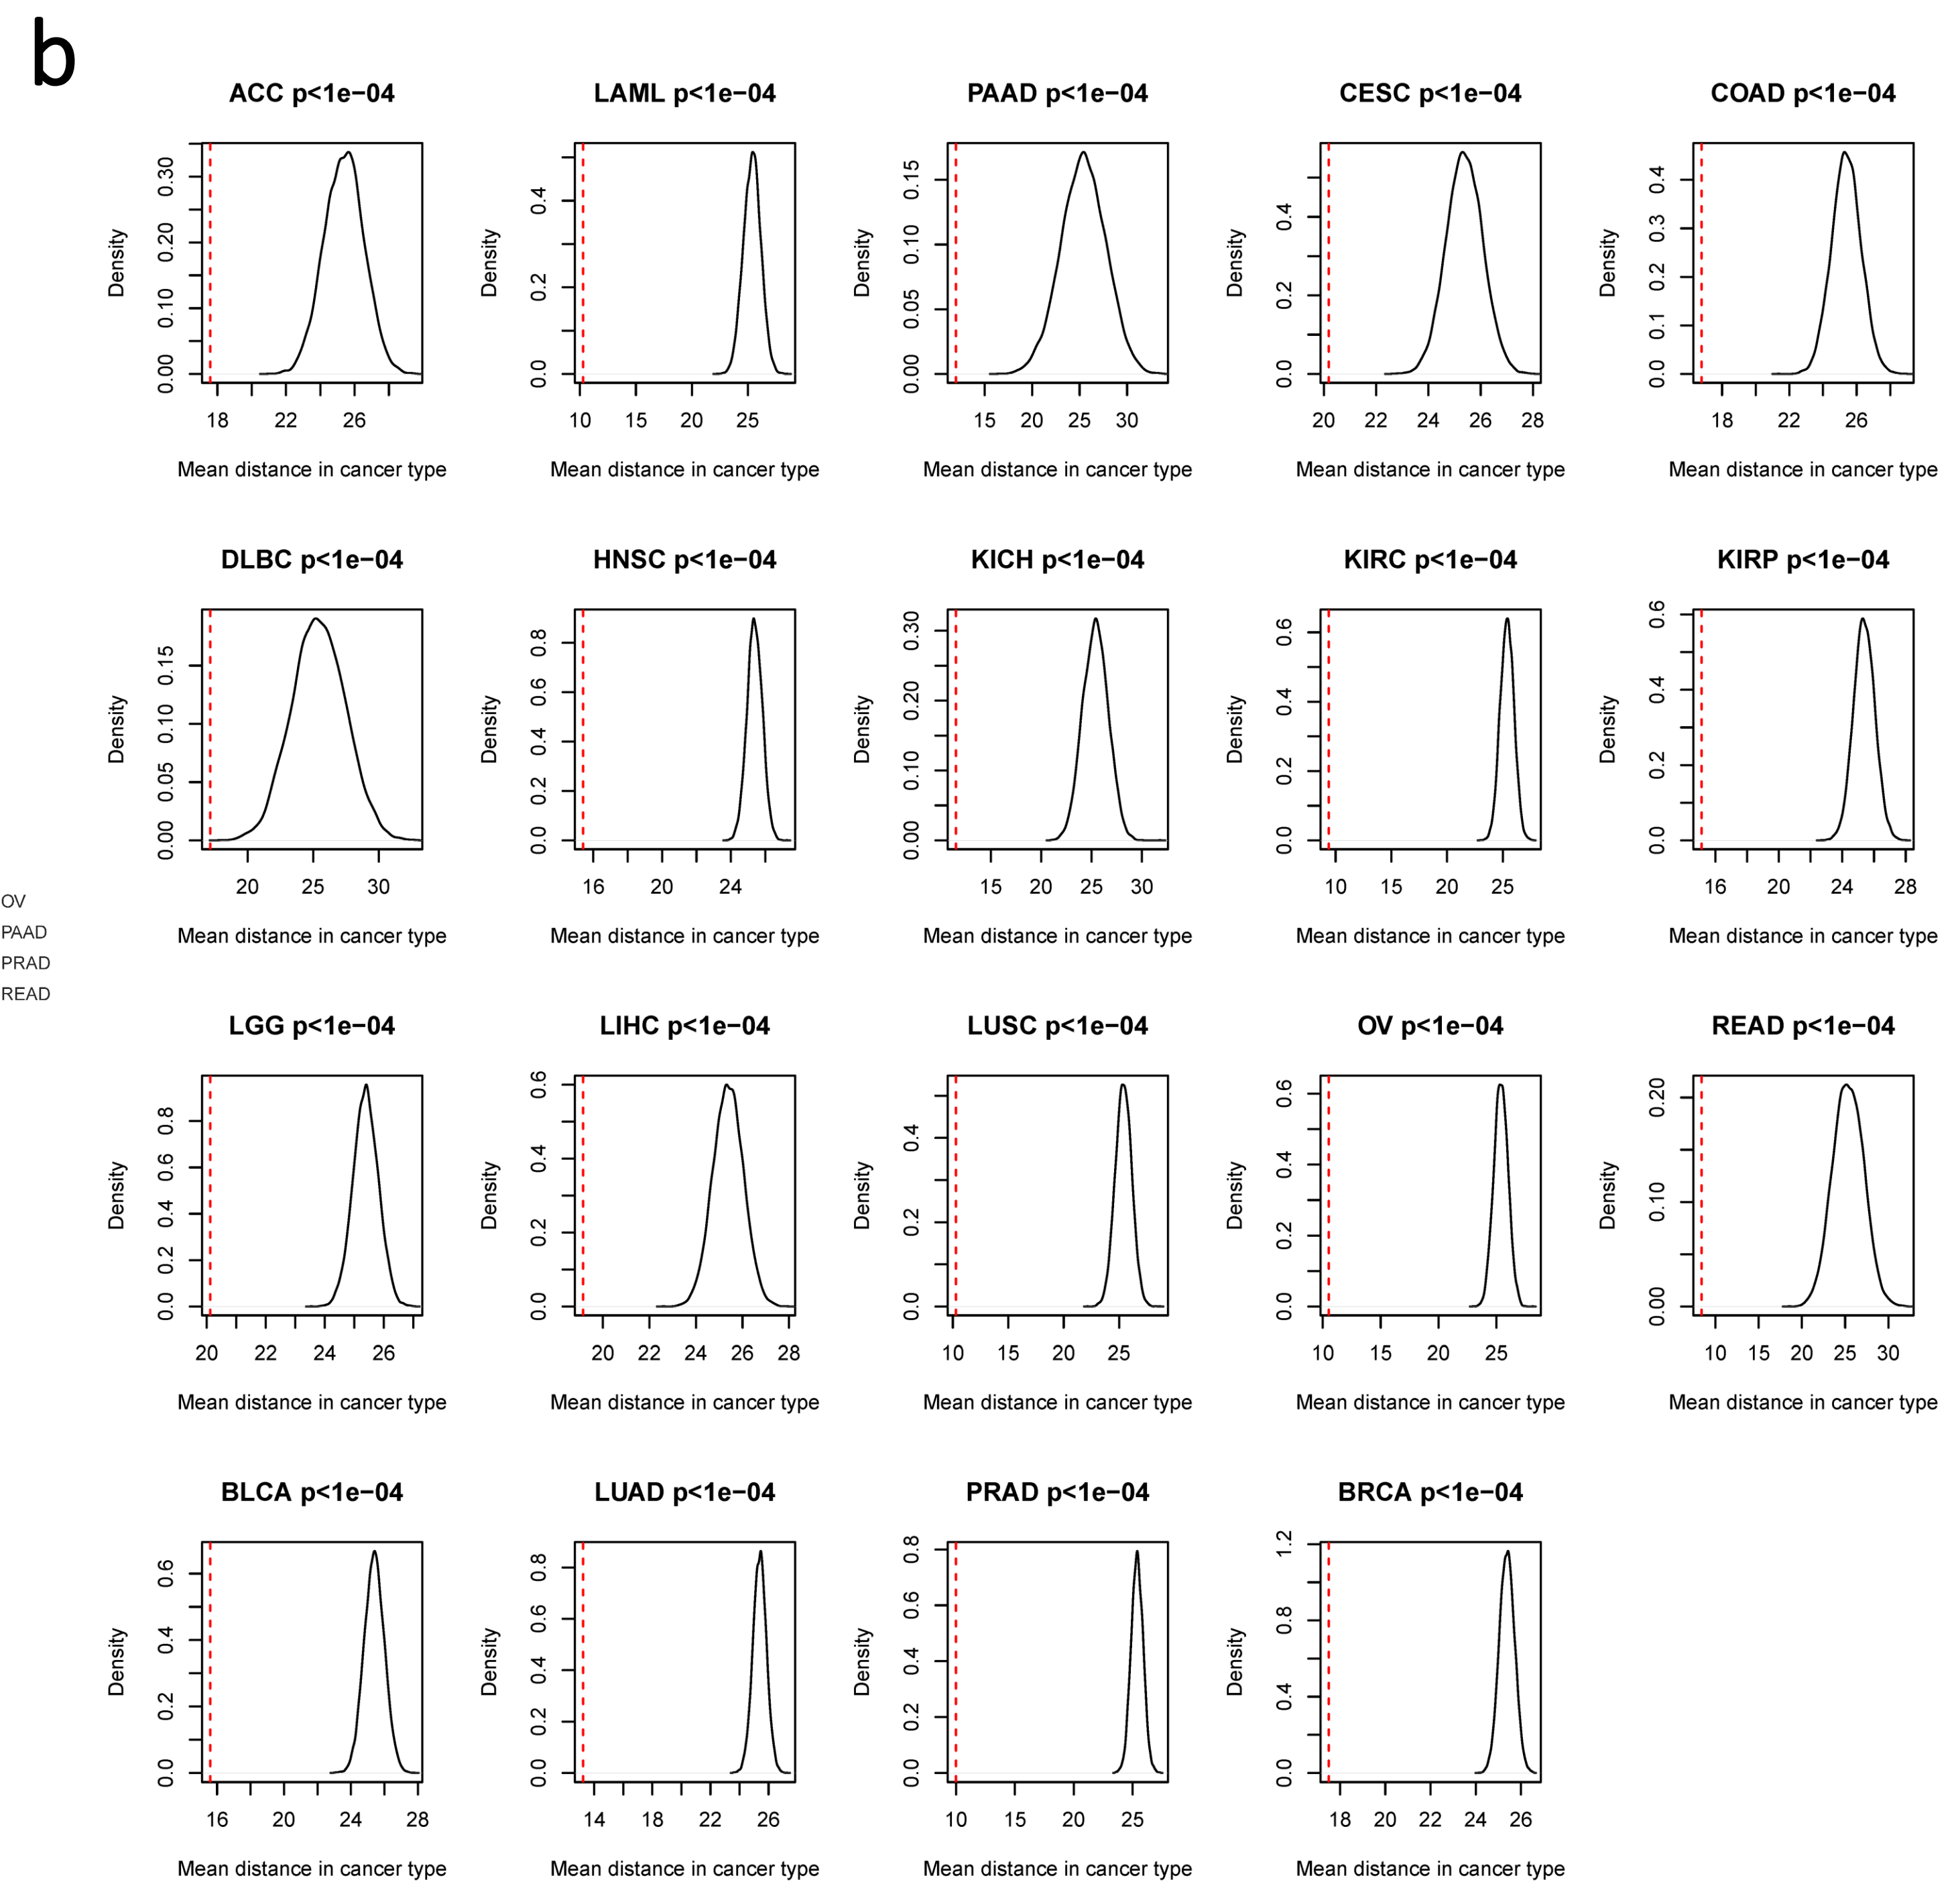

Figure S13

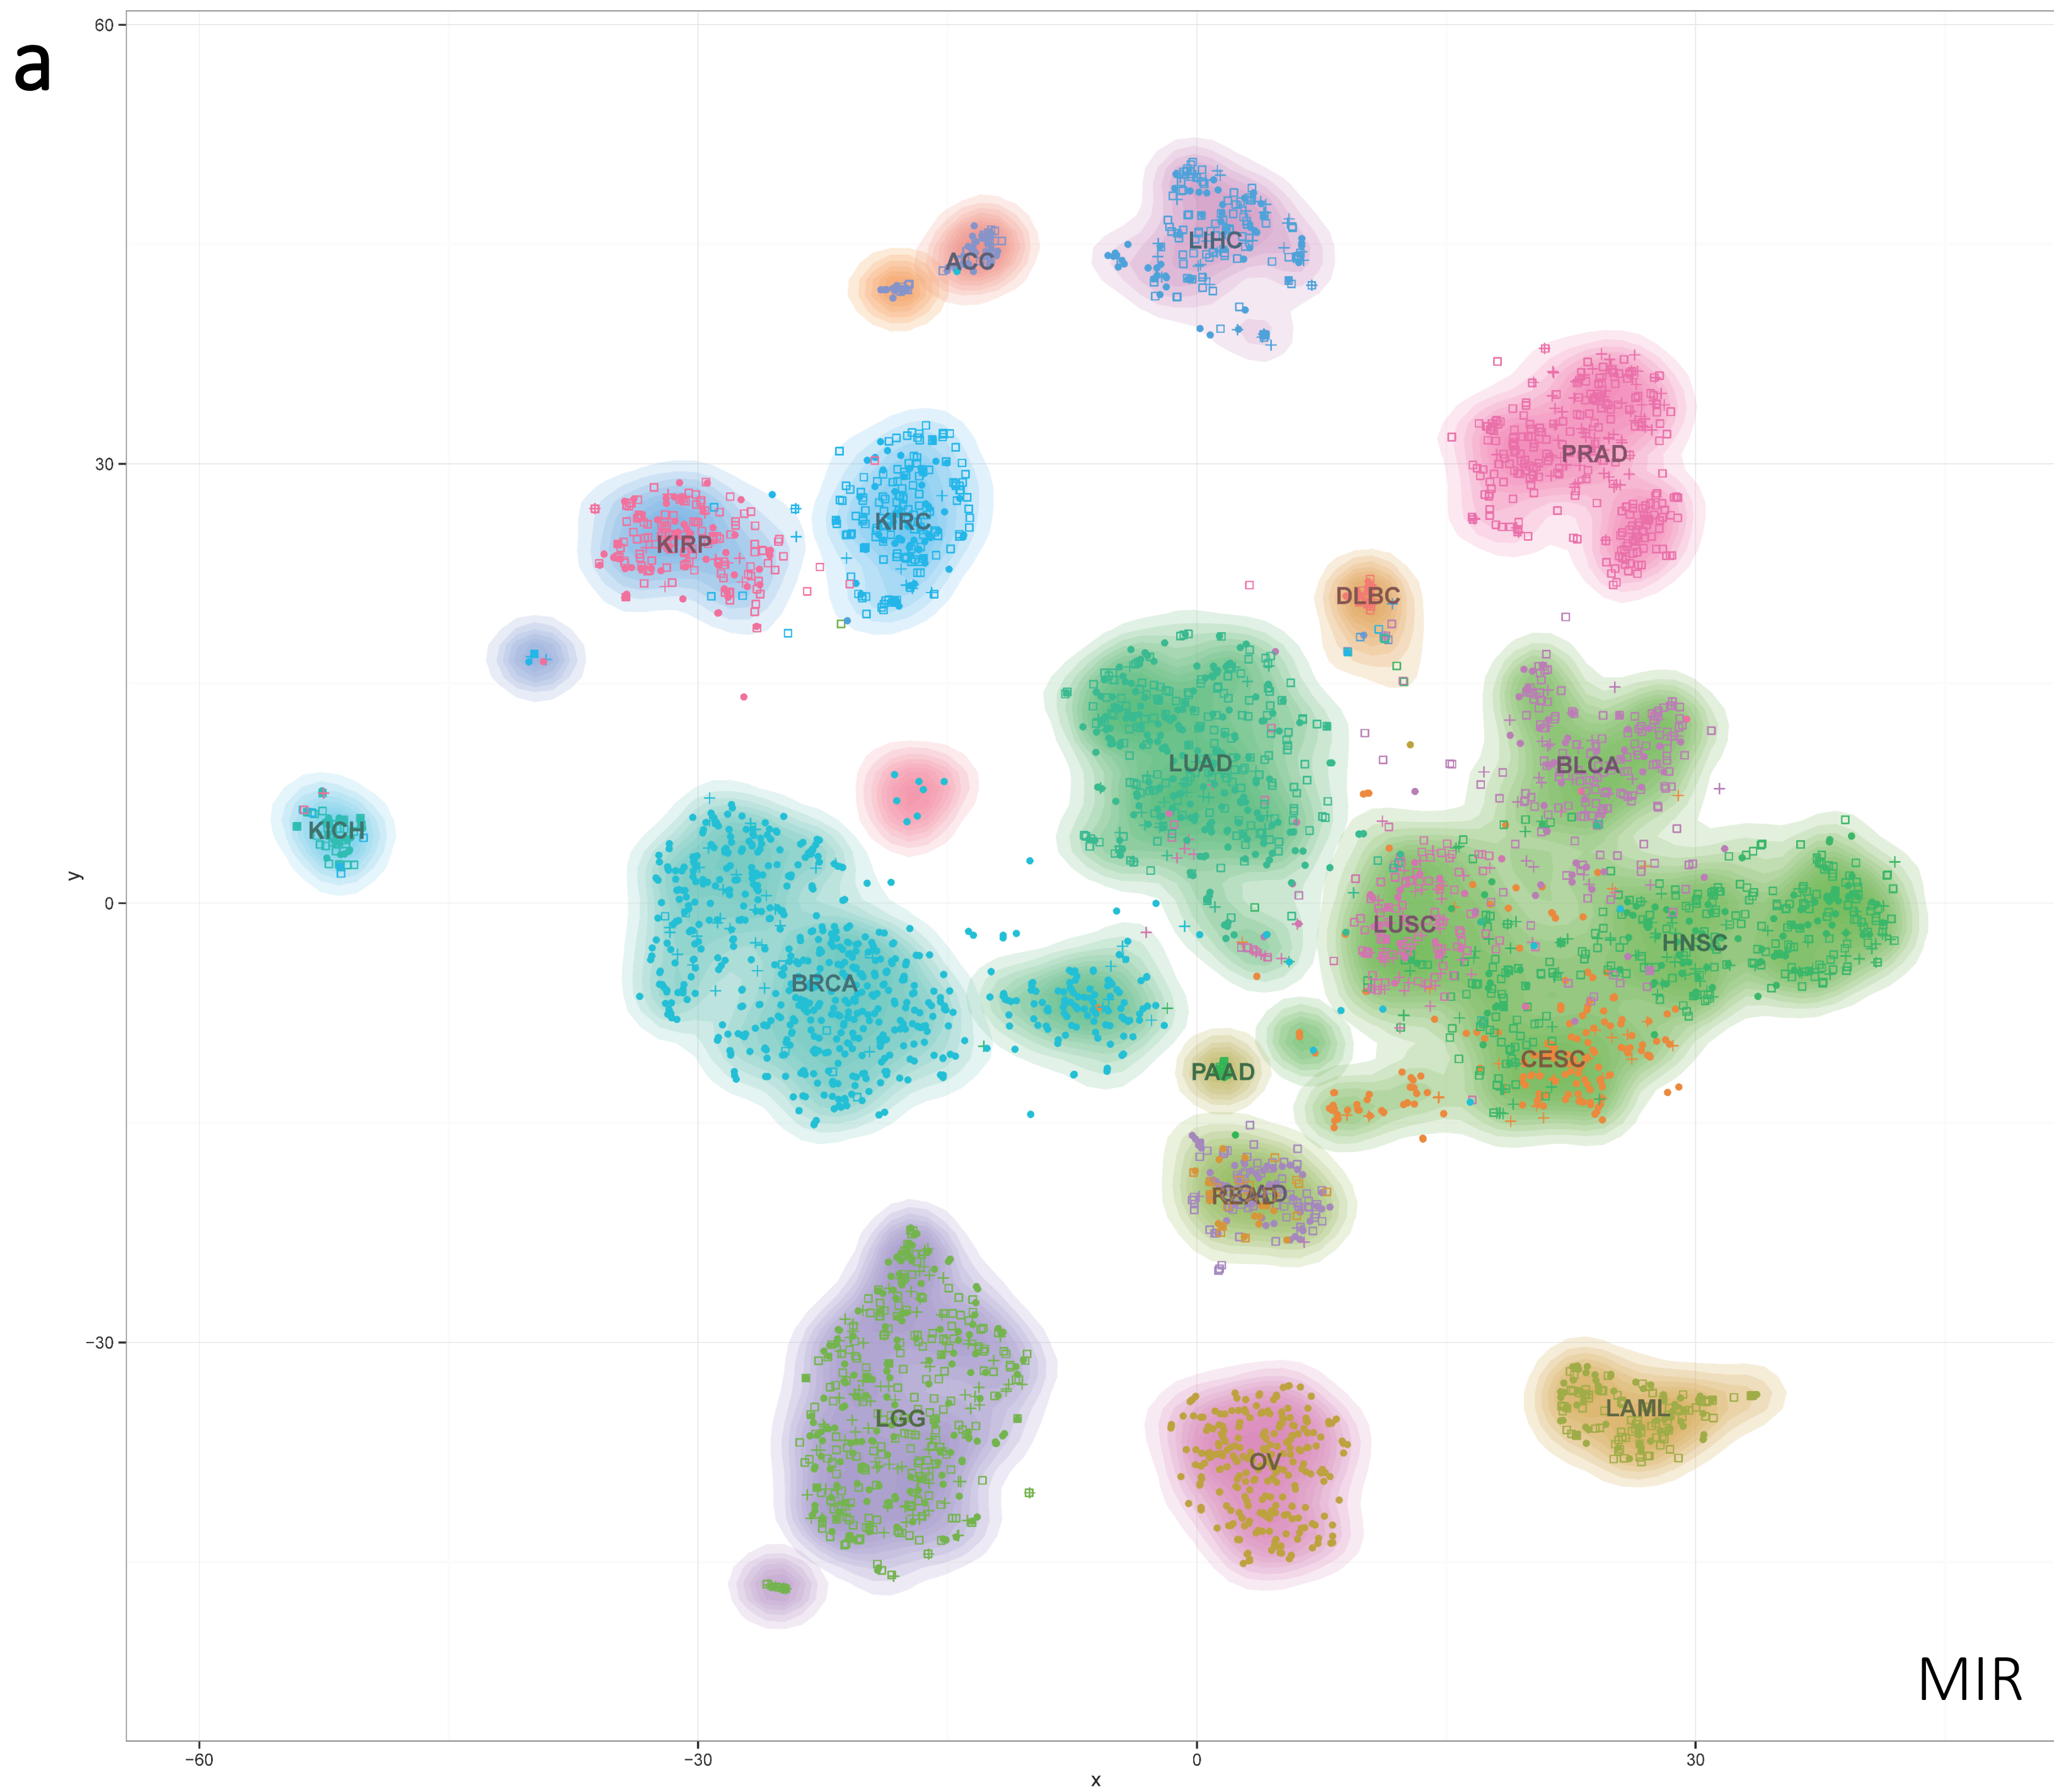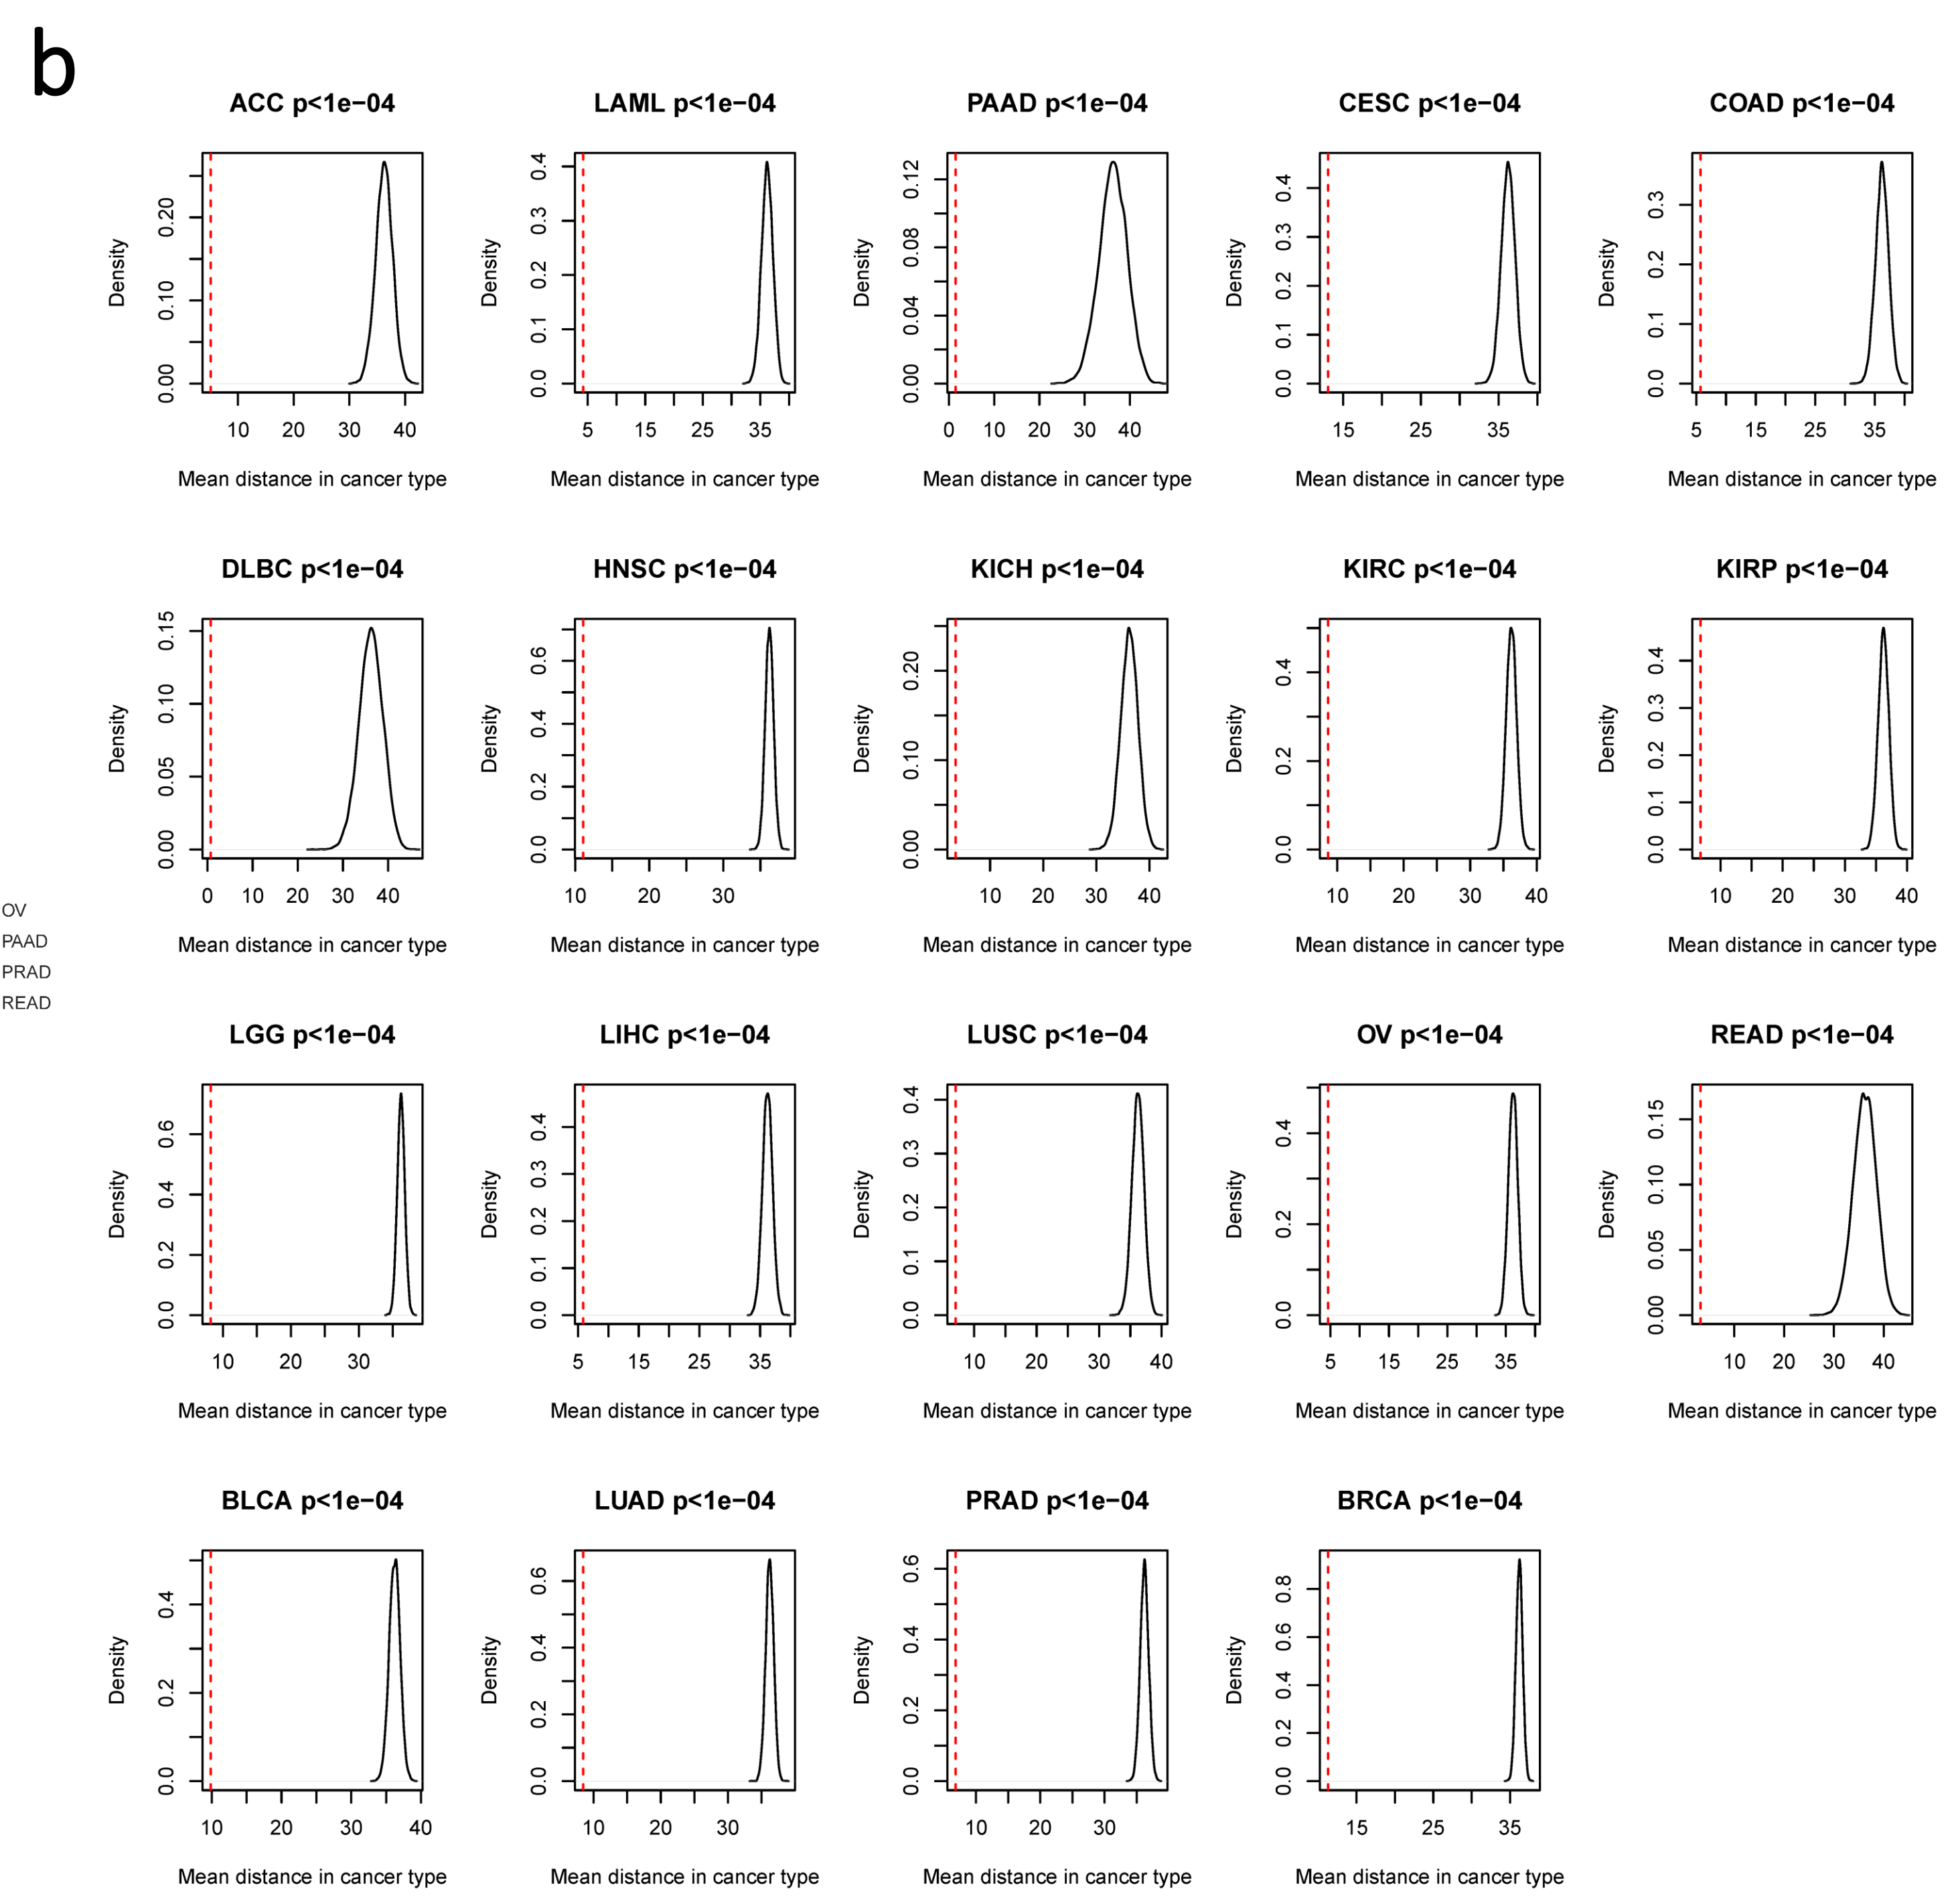



Figure S14

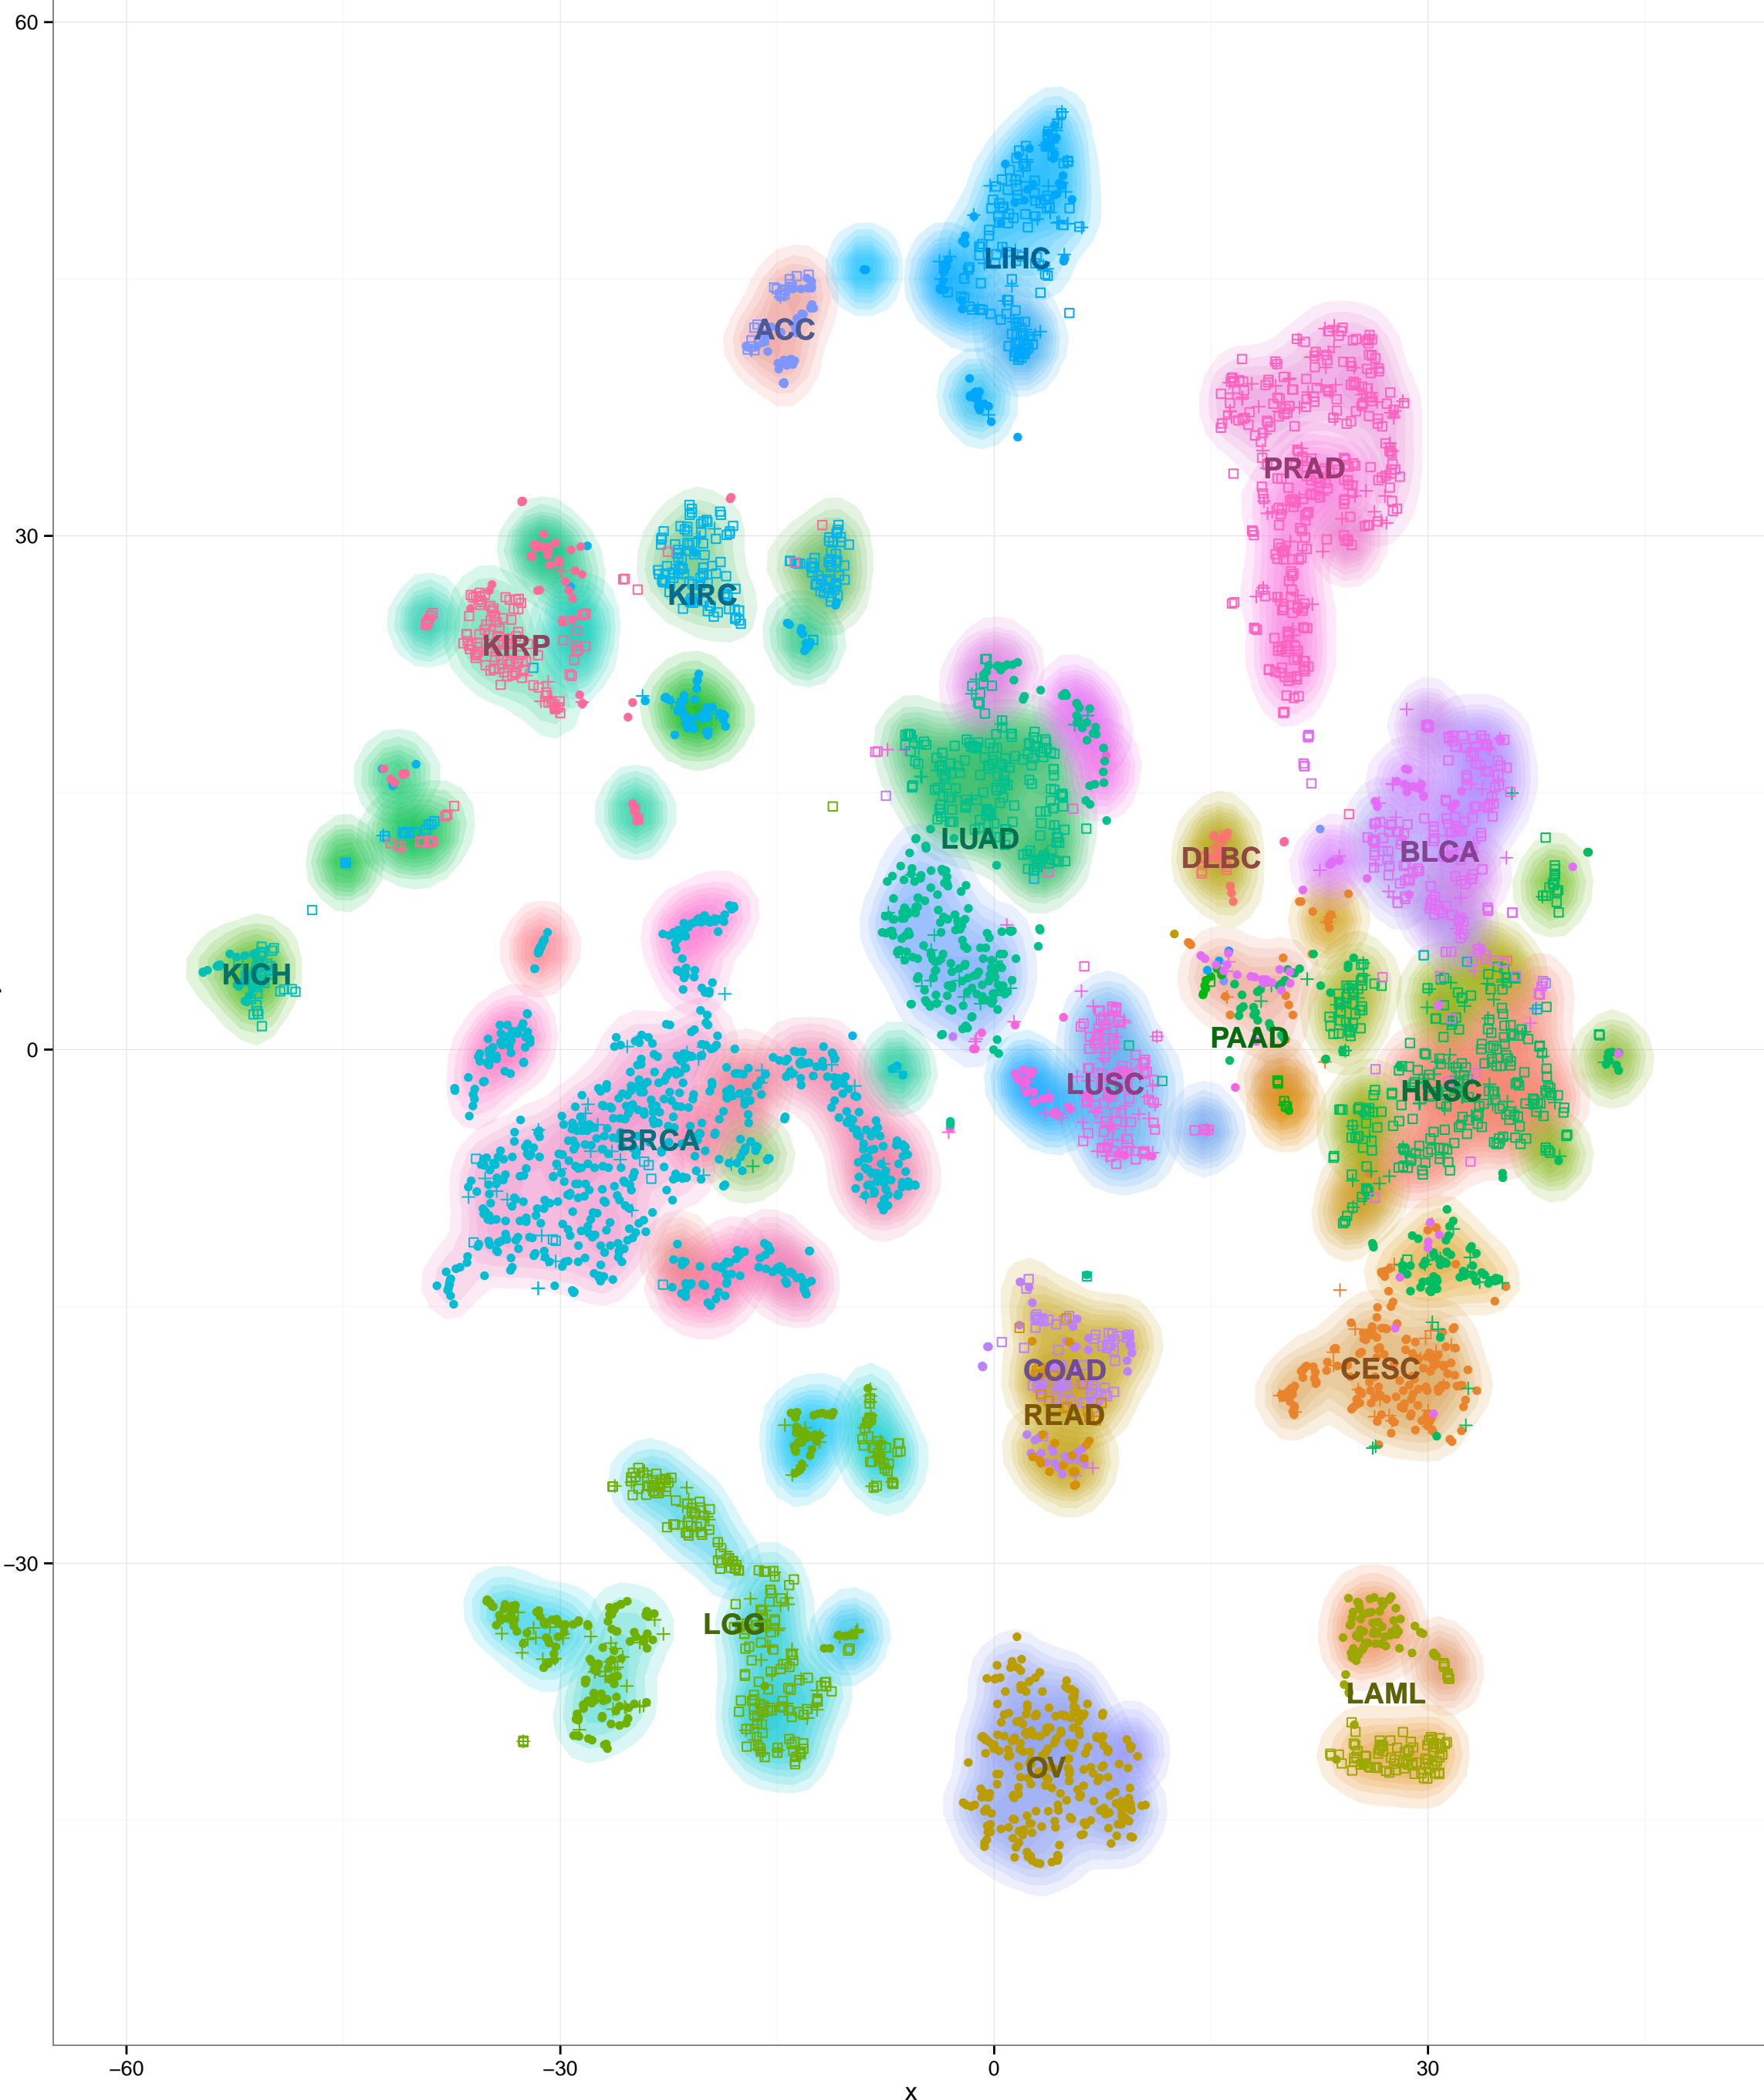

**Cluster**

|   |    |    |    |    |    |    |    |    |    |    |    |    |    |    |    |
|---|----|----|----|----|----|----|----|----|----|----|----|----|----|----|----|
| 1 | 6  | 11 | 16 | 21 | 26 | 31 | 36 | 41 | 46 | 51 | 56 | 61 | 66 | 71 | 76 |
| 2 | 7  | 12 | 17 | 22 | 27 | 32 | 37 | 42 | 47 | 52 | 57 | 62 | 67 | 72 | 77 |
| 3 | 8  | 13 | 18 | 23 | 28 | 33 | 38 | 43 | 48 | 53 | 58 | 63 | 68 | 73 | 78 |
| 4 | 9  | 14 | 19 | 24 | 29 | 34 | 39 | 44 | 49 | 54 | 59 | 64 | 69 | 74 | 79 |
| 5 | 10 | 15 | 20 | 25 | 30 | 35 | 40 | 45 | 50 | 55 | 60 | 65 | 70 | 75 |    |

**Tissue type**

|      |      |      |      |
|------|------|------|------|
| ACC  | DLBC | LAML | OV   |
| BLCA | HNSC | LGG  | PAAD |
| BRCA | KICH | LIHC | PRAD |
| CESC | KIRC | LUAD | READ |
| COAD | KIRP | LUSC |      |

**sex**

|           |
|-----------|
| ● female  |
| □ male    |
| + unknown |

Figure S15

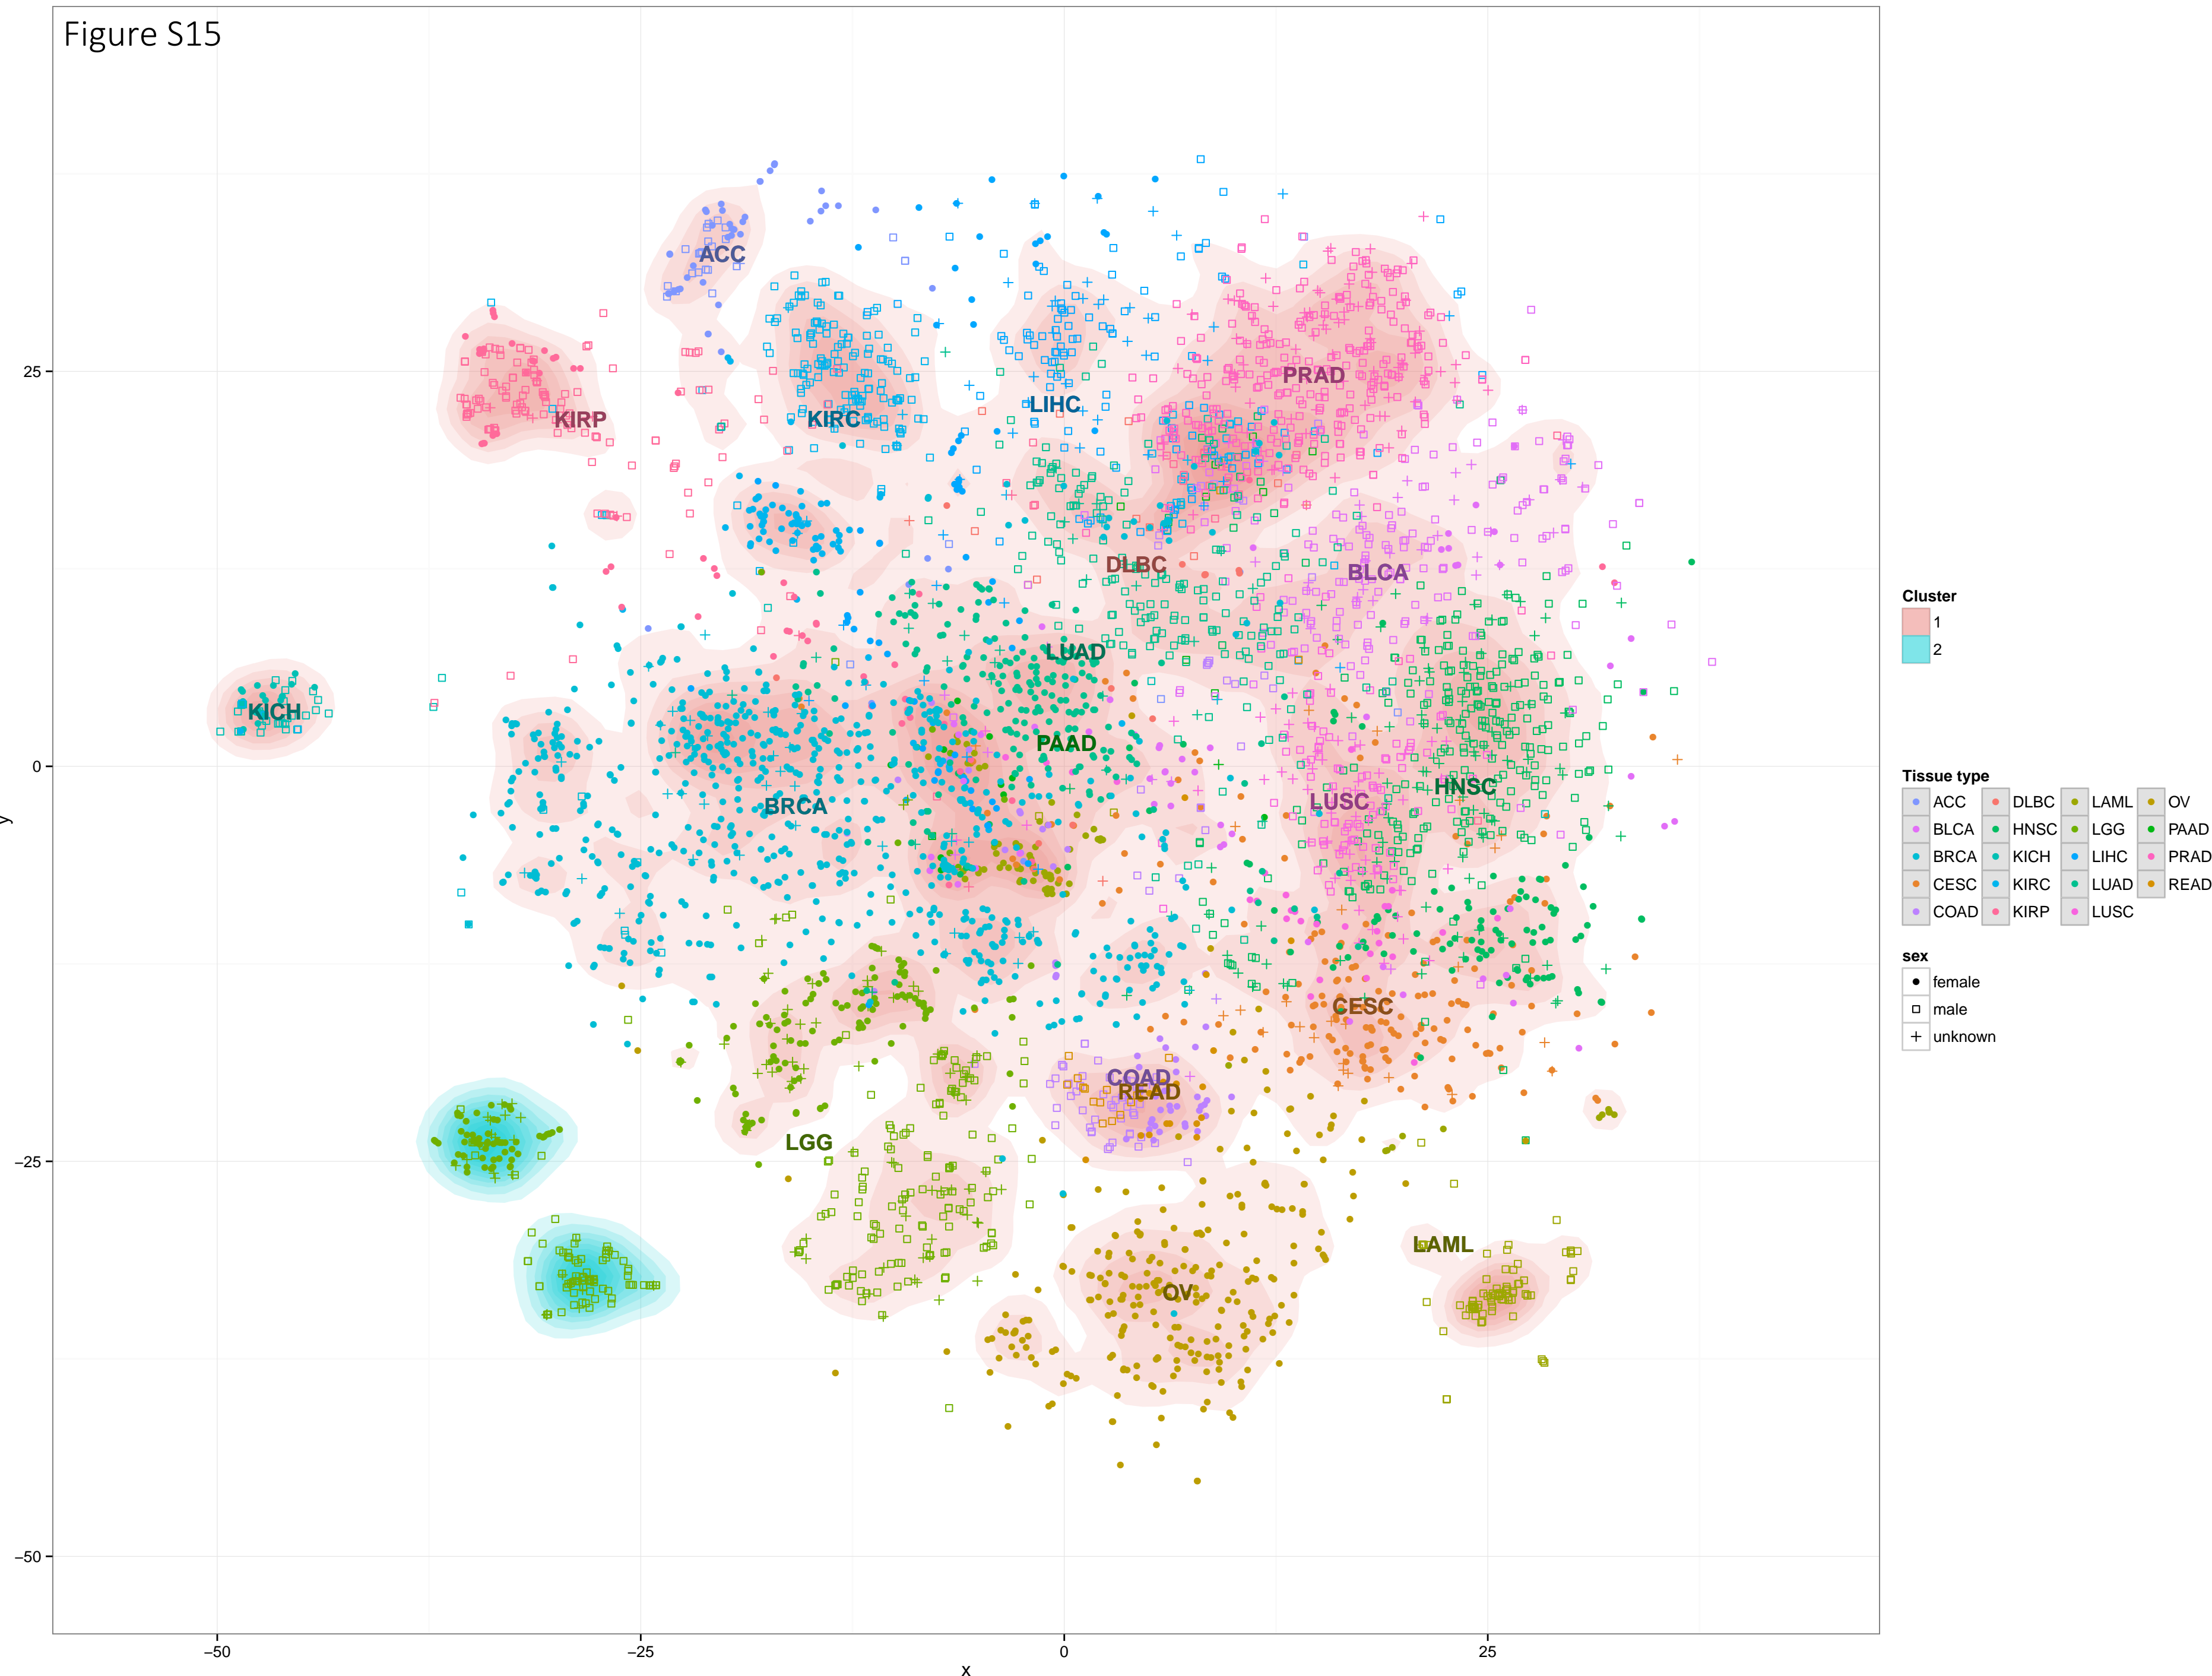

Figure S16

a

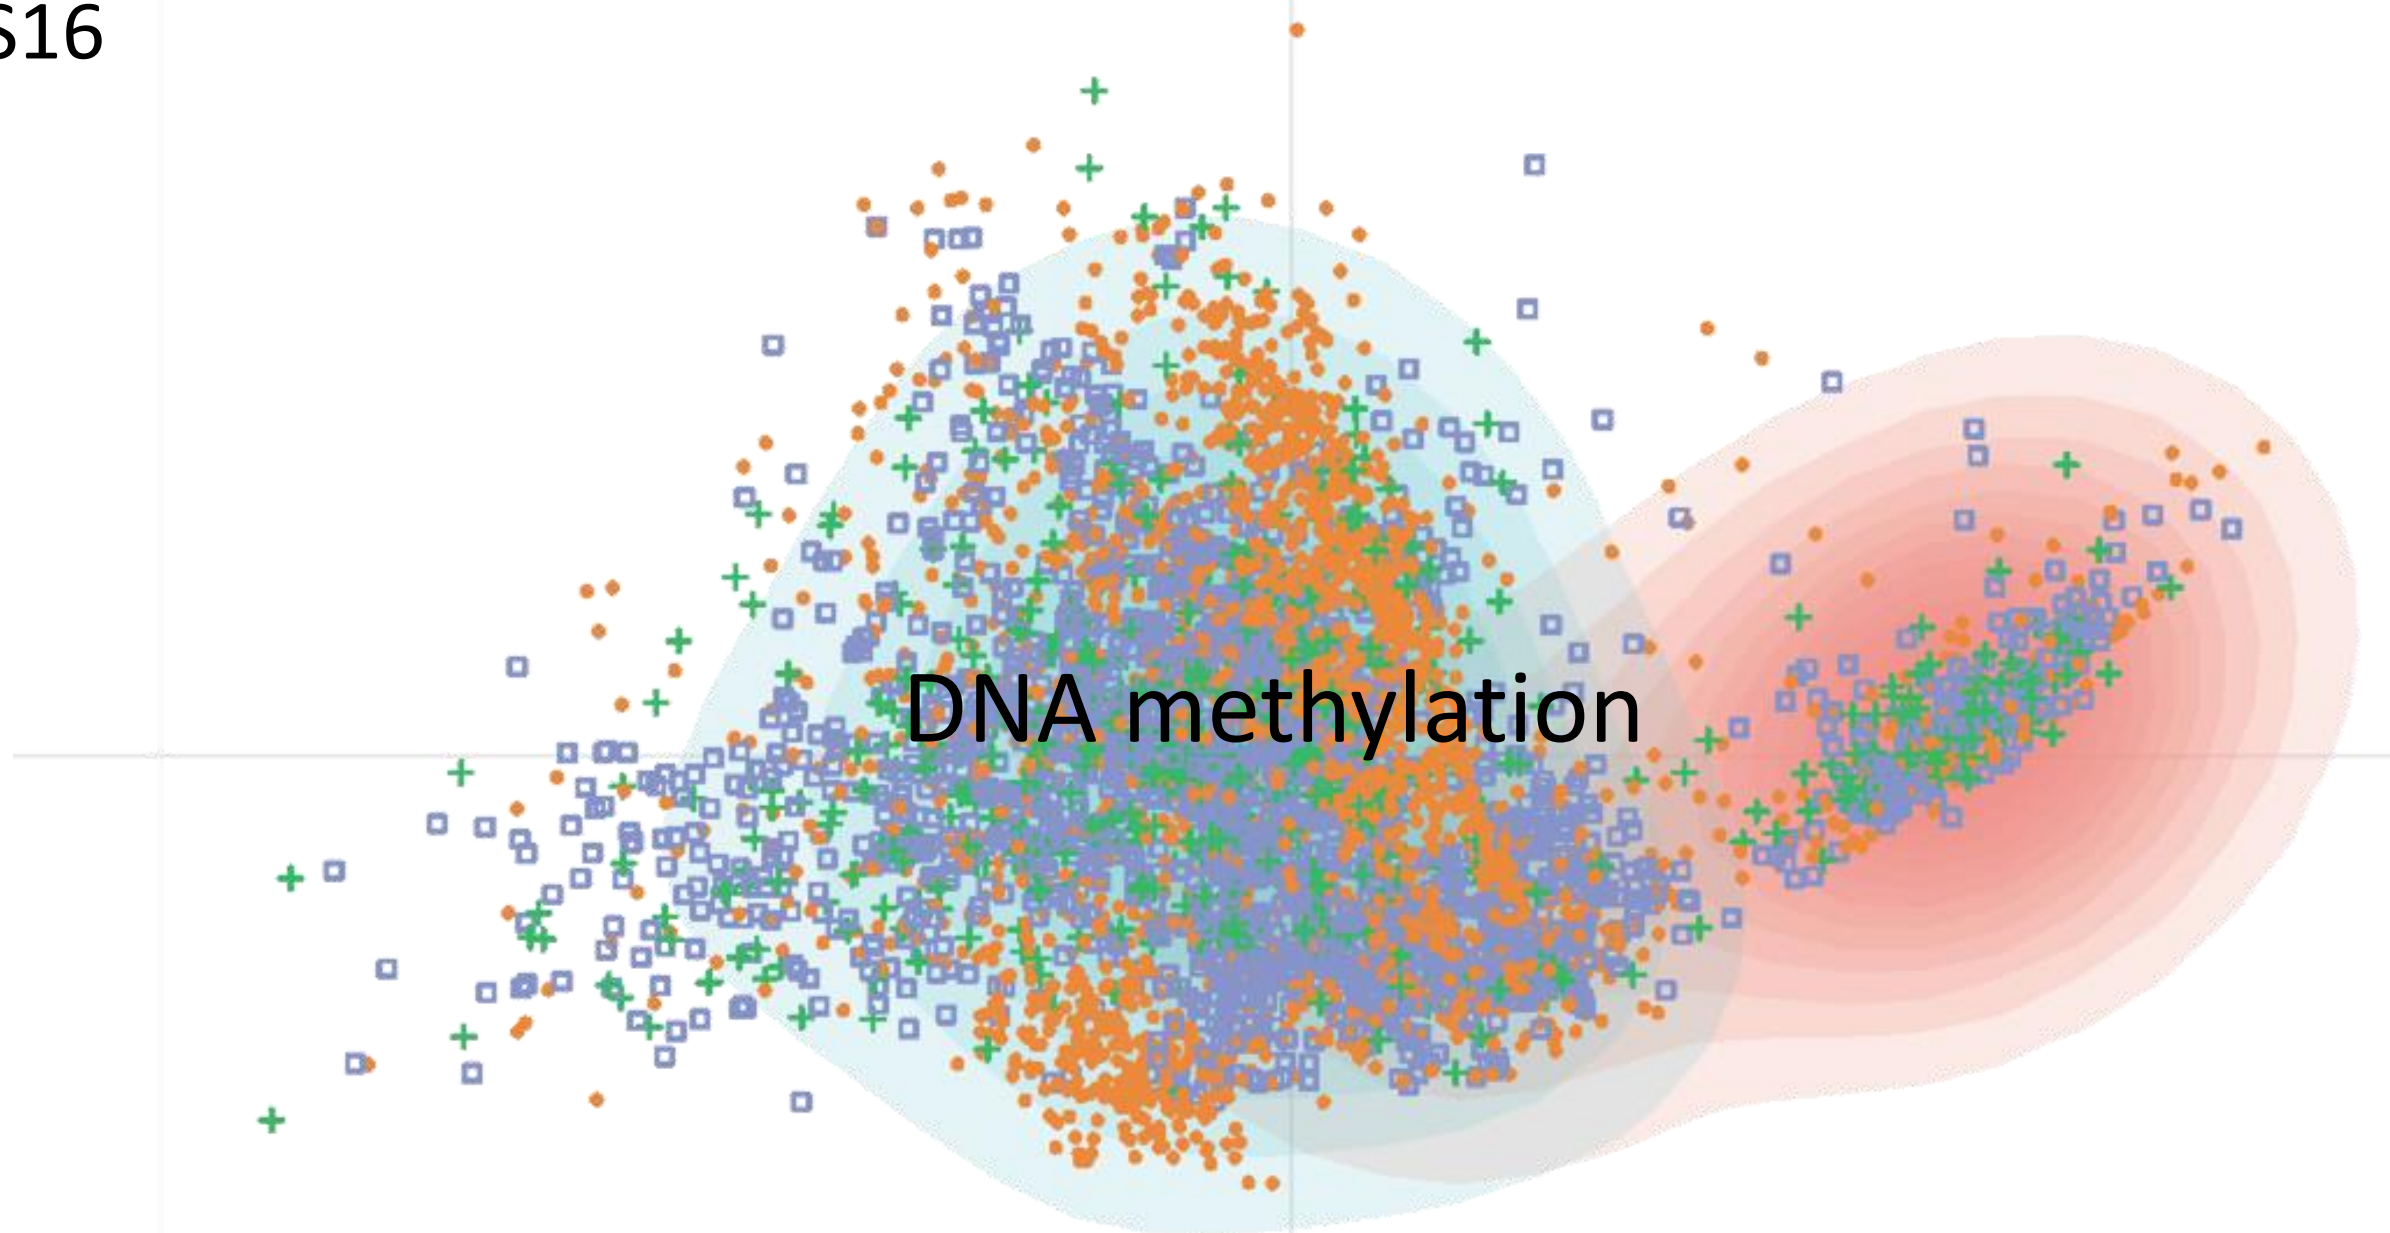

b

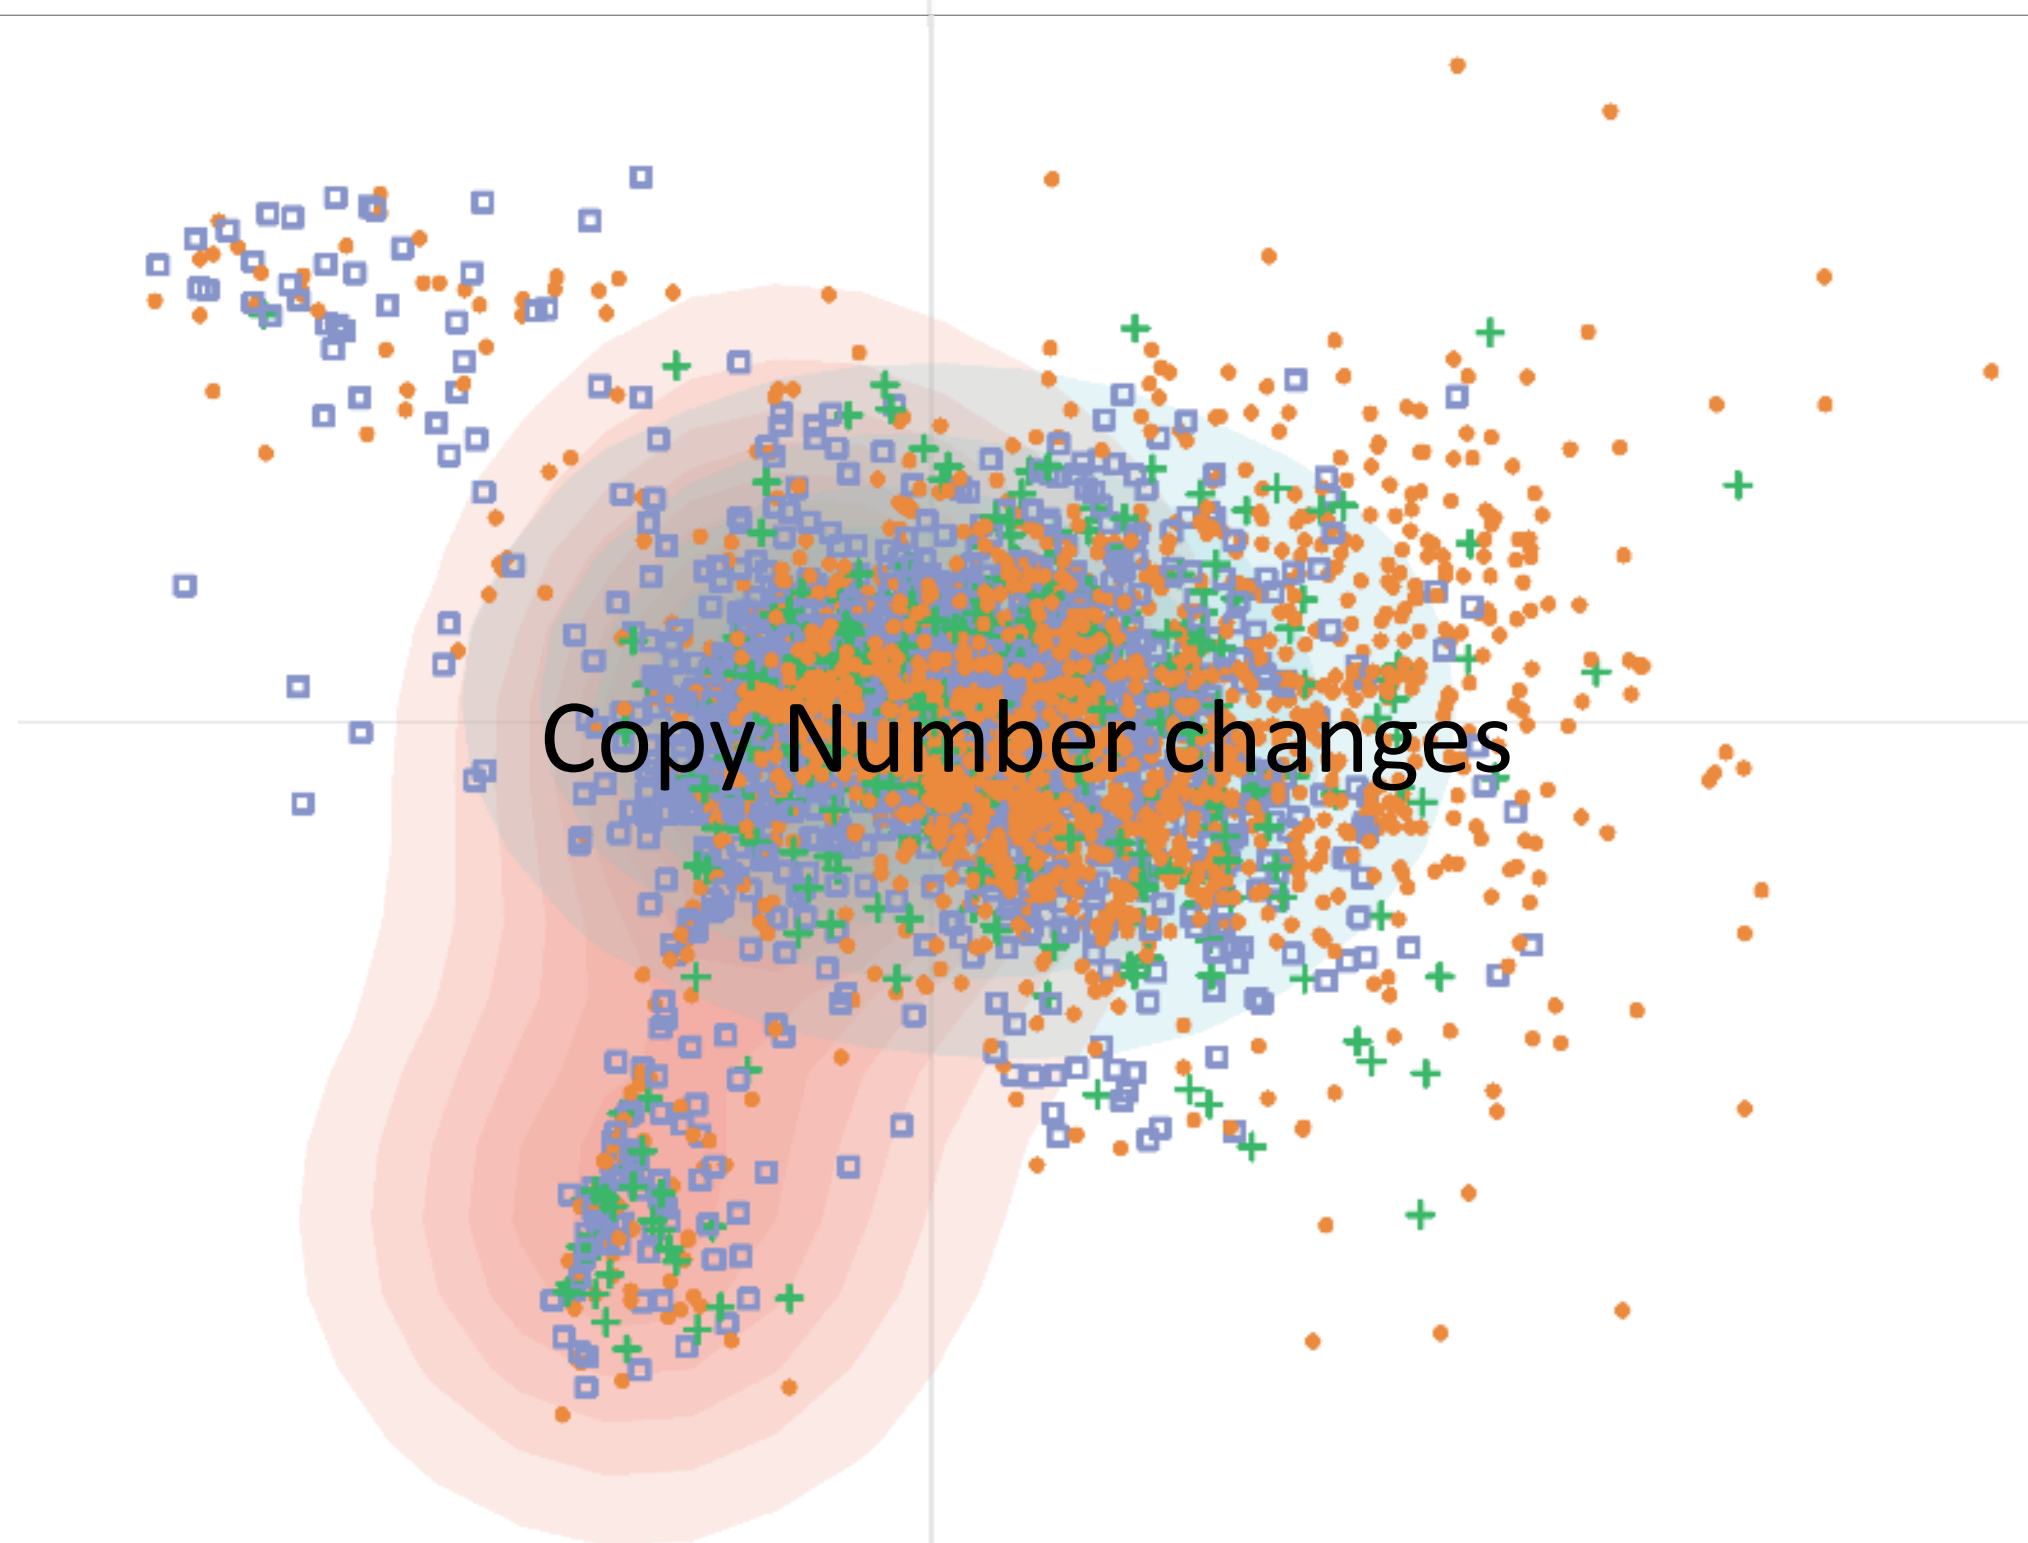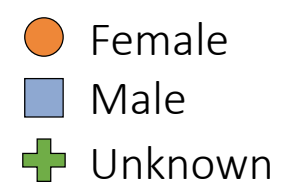

# Figure S17

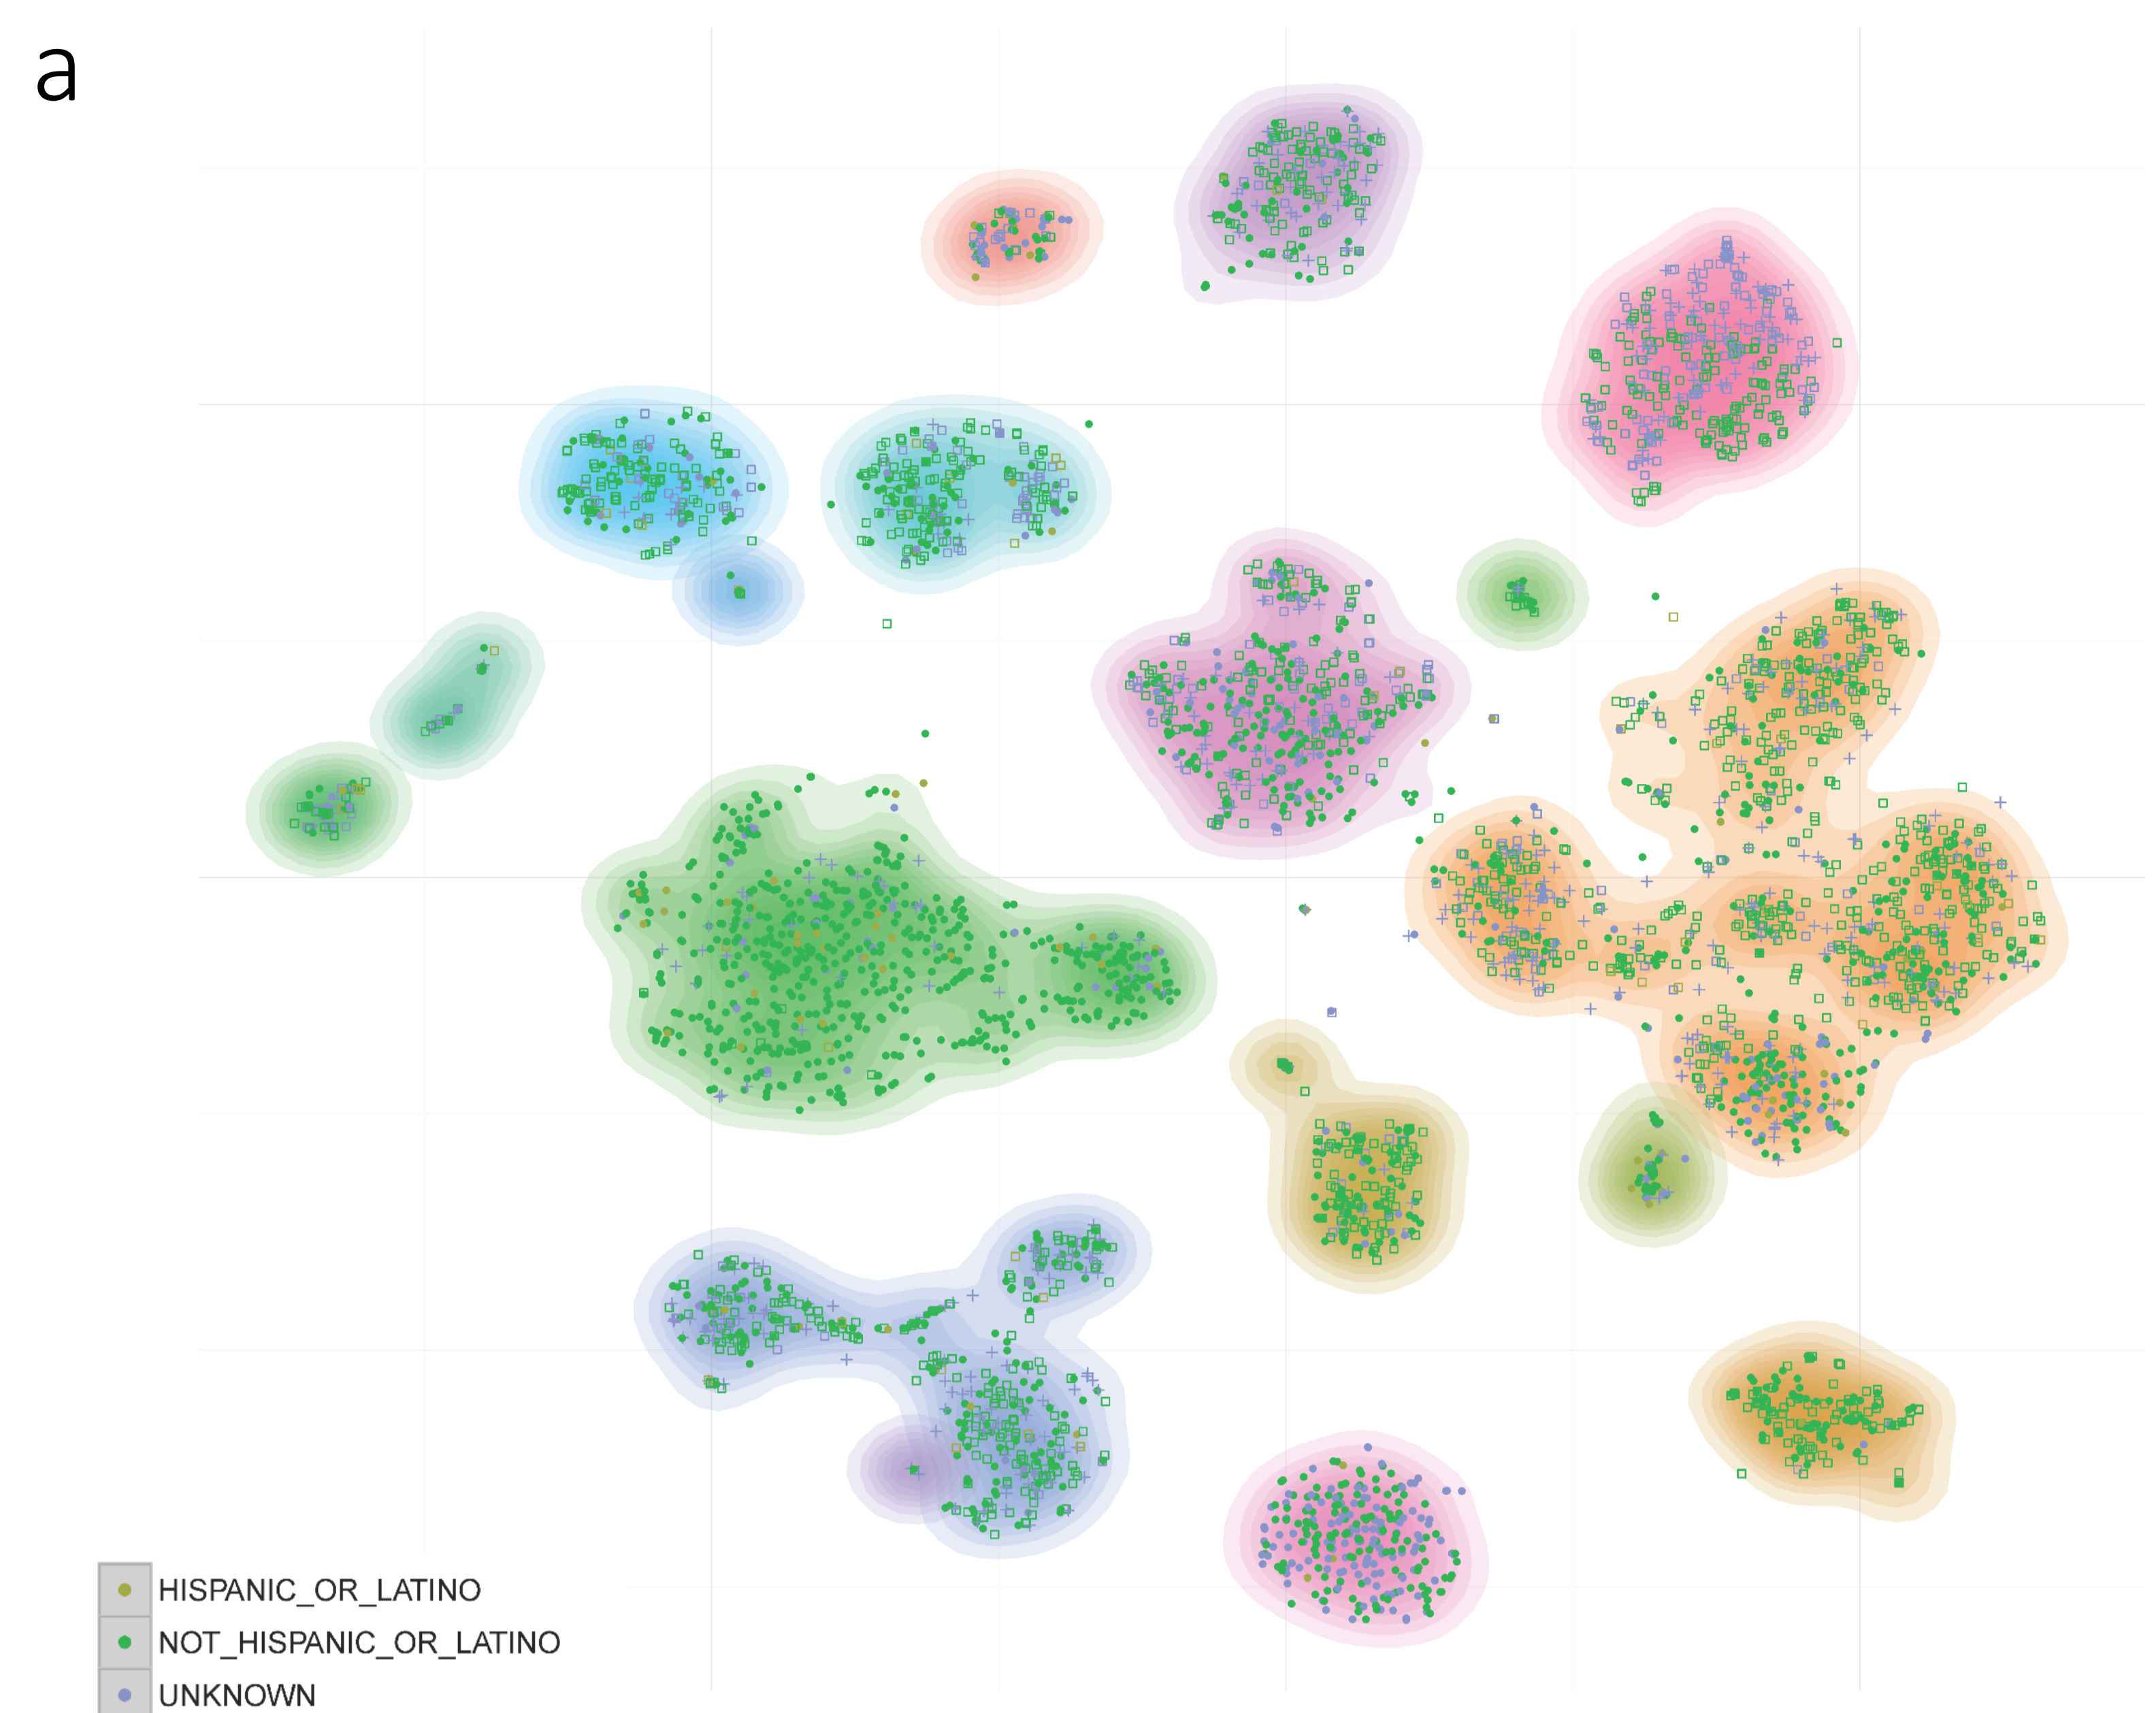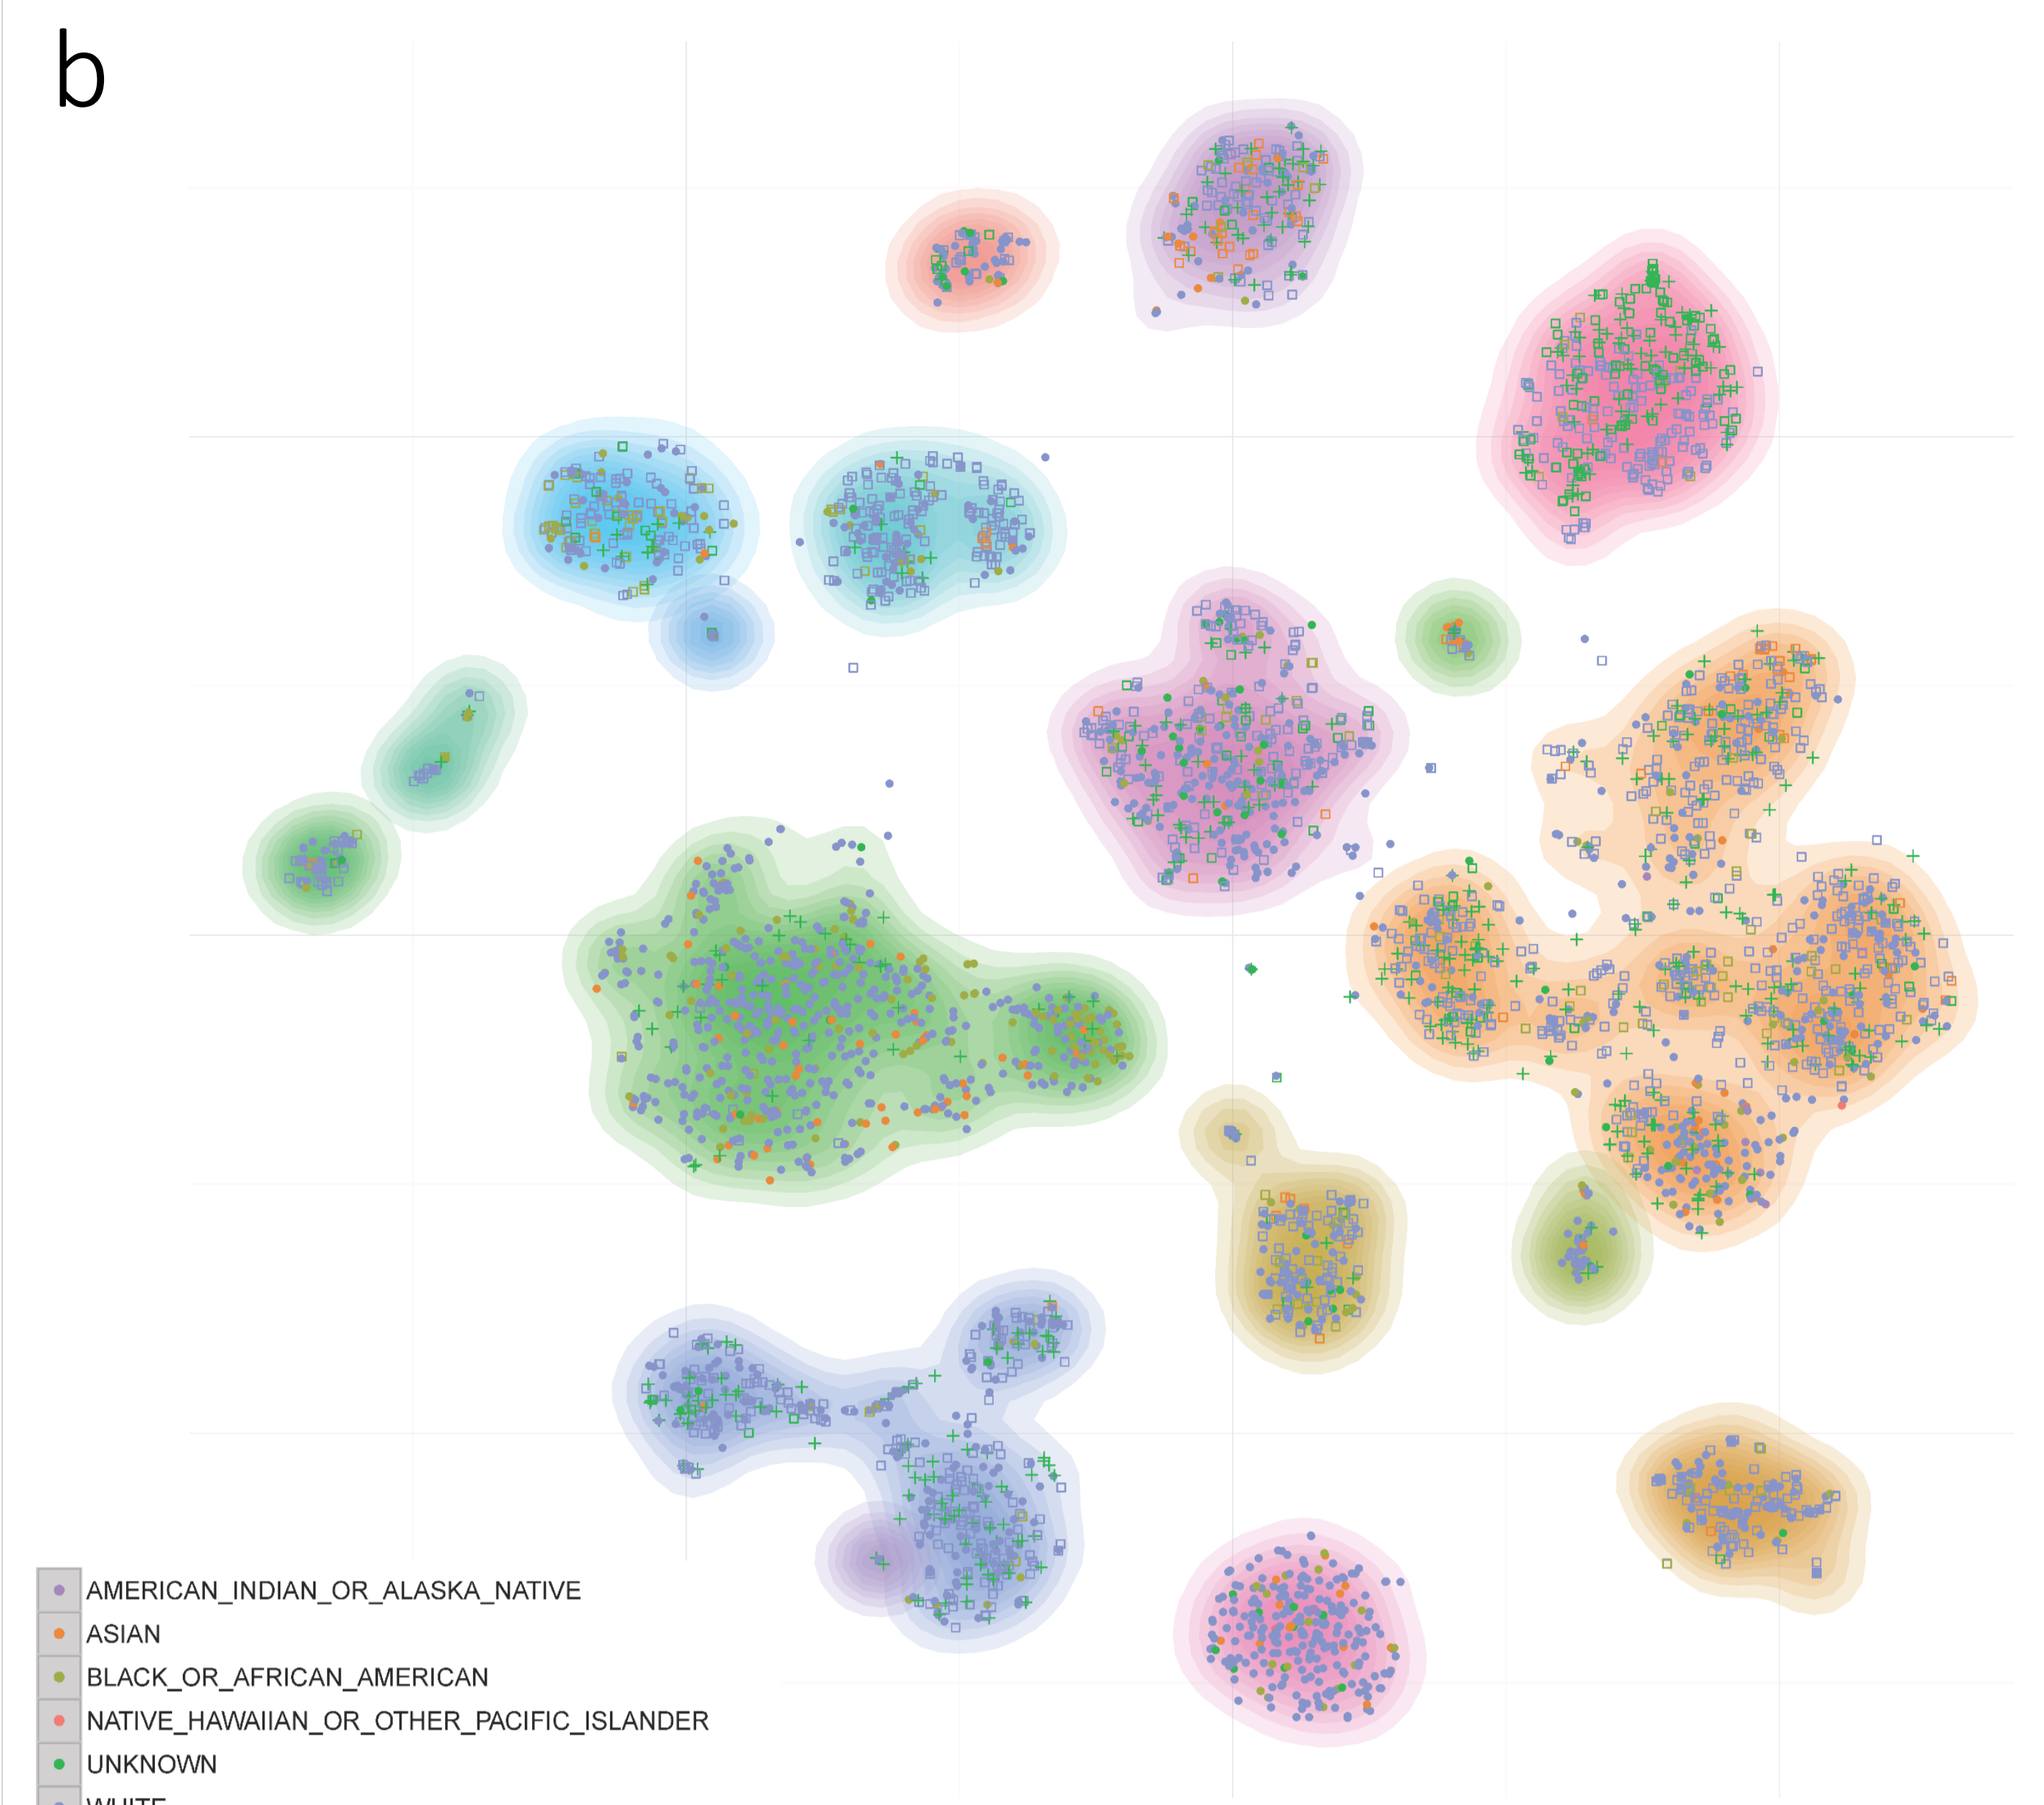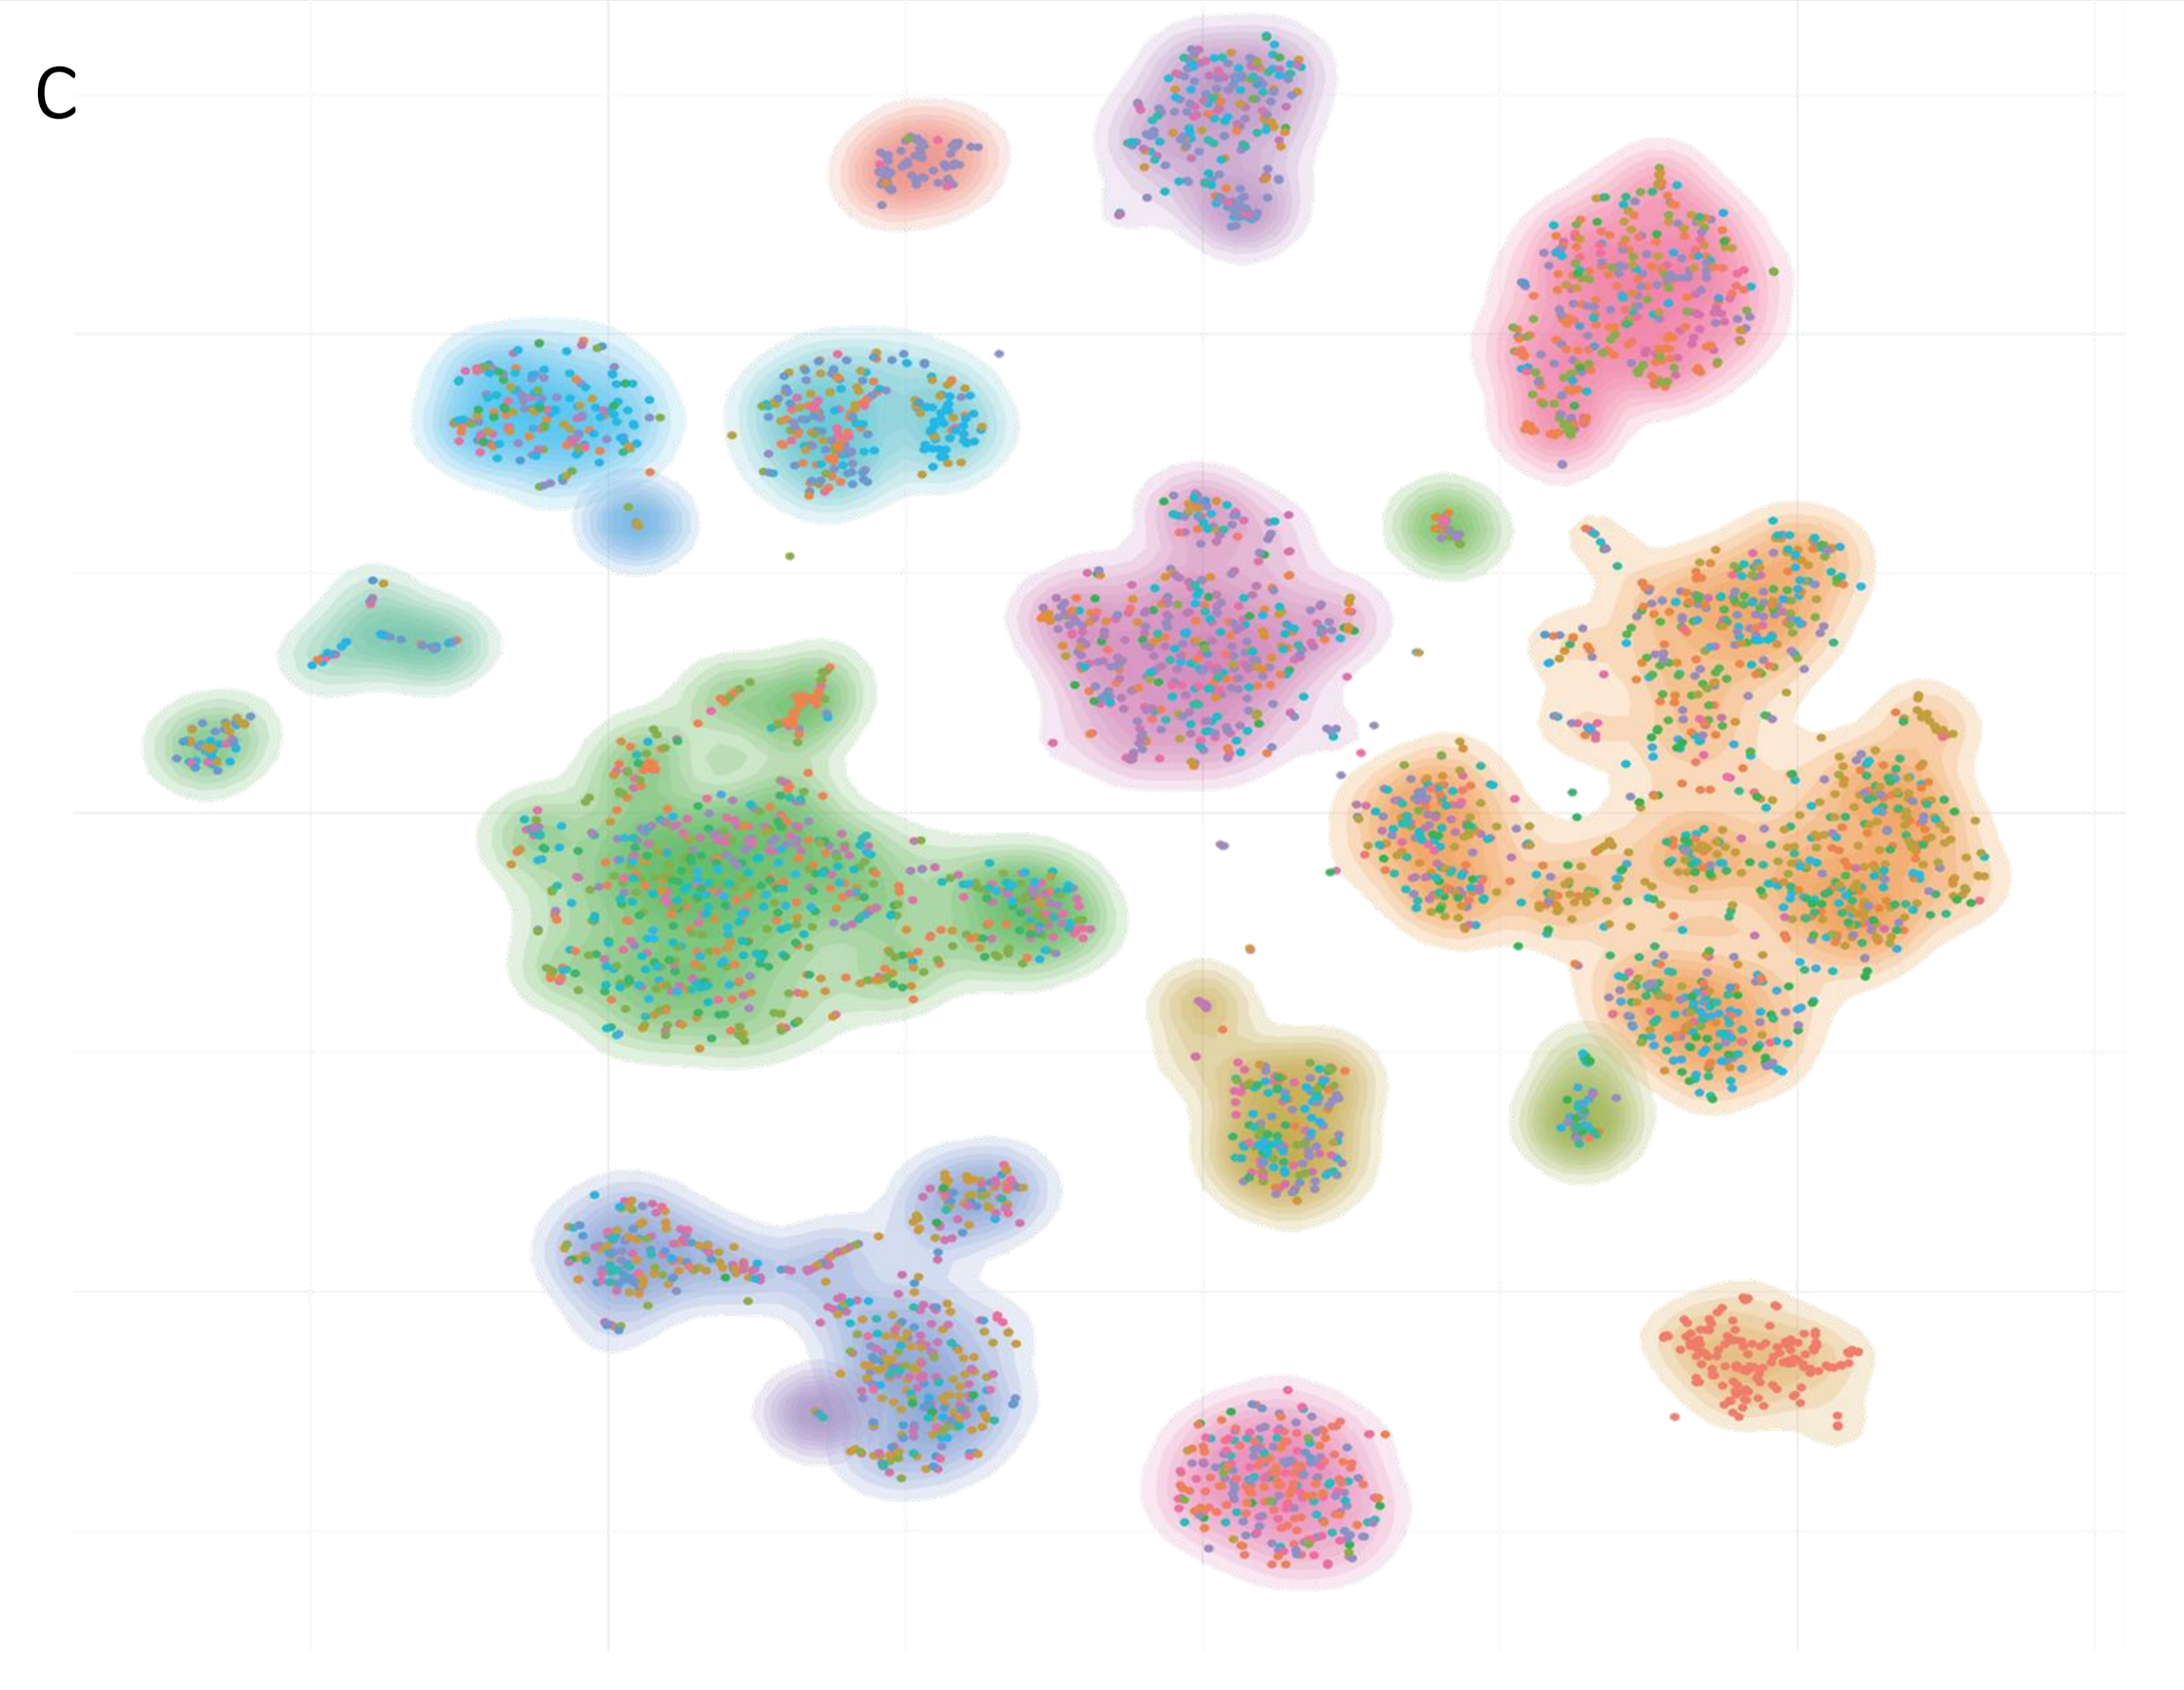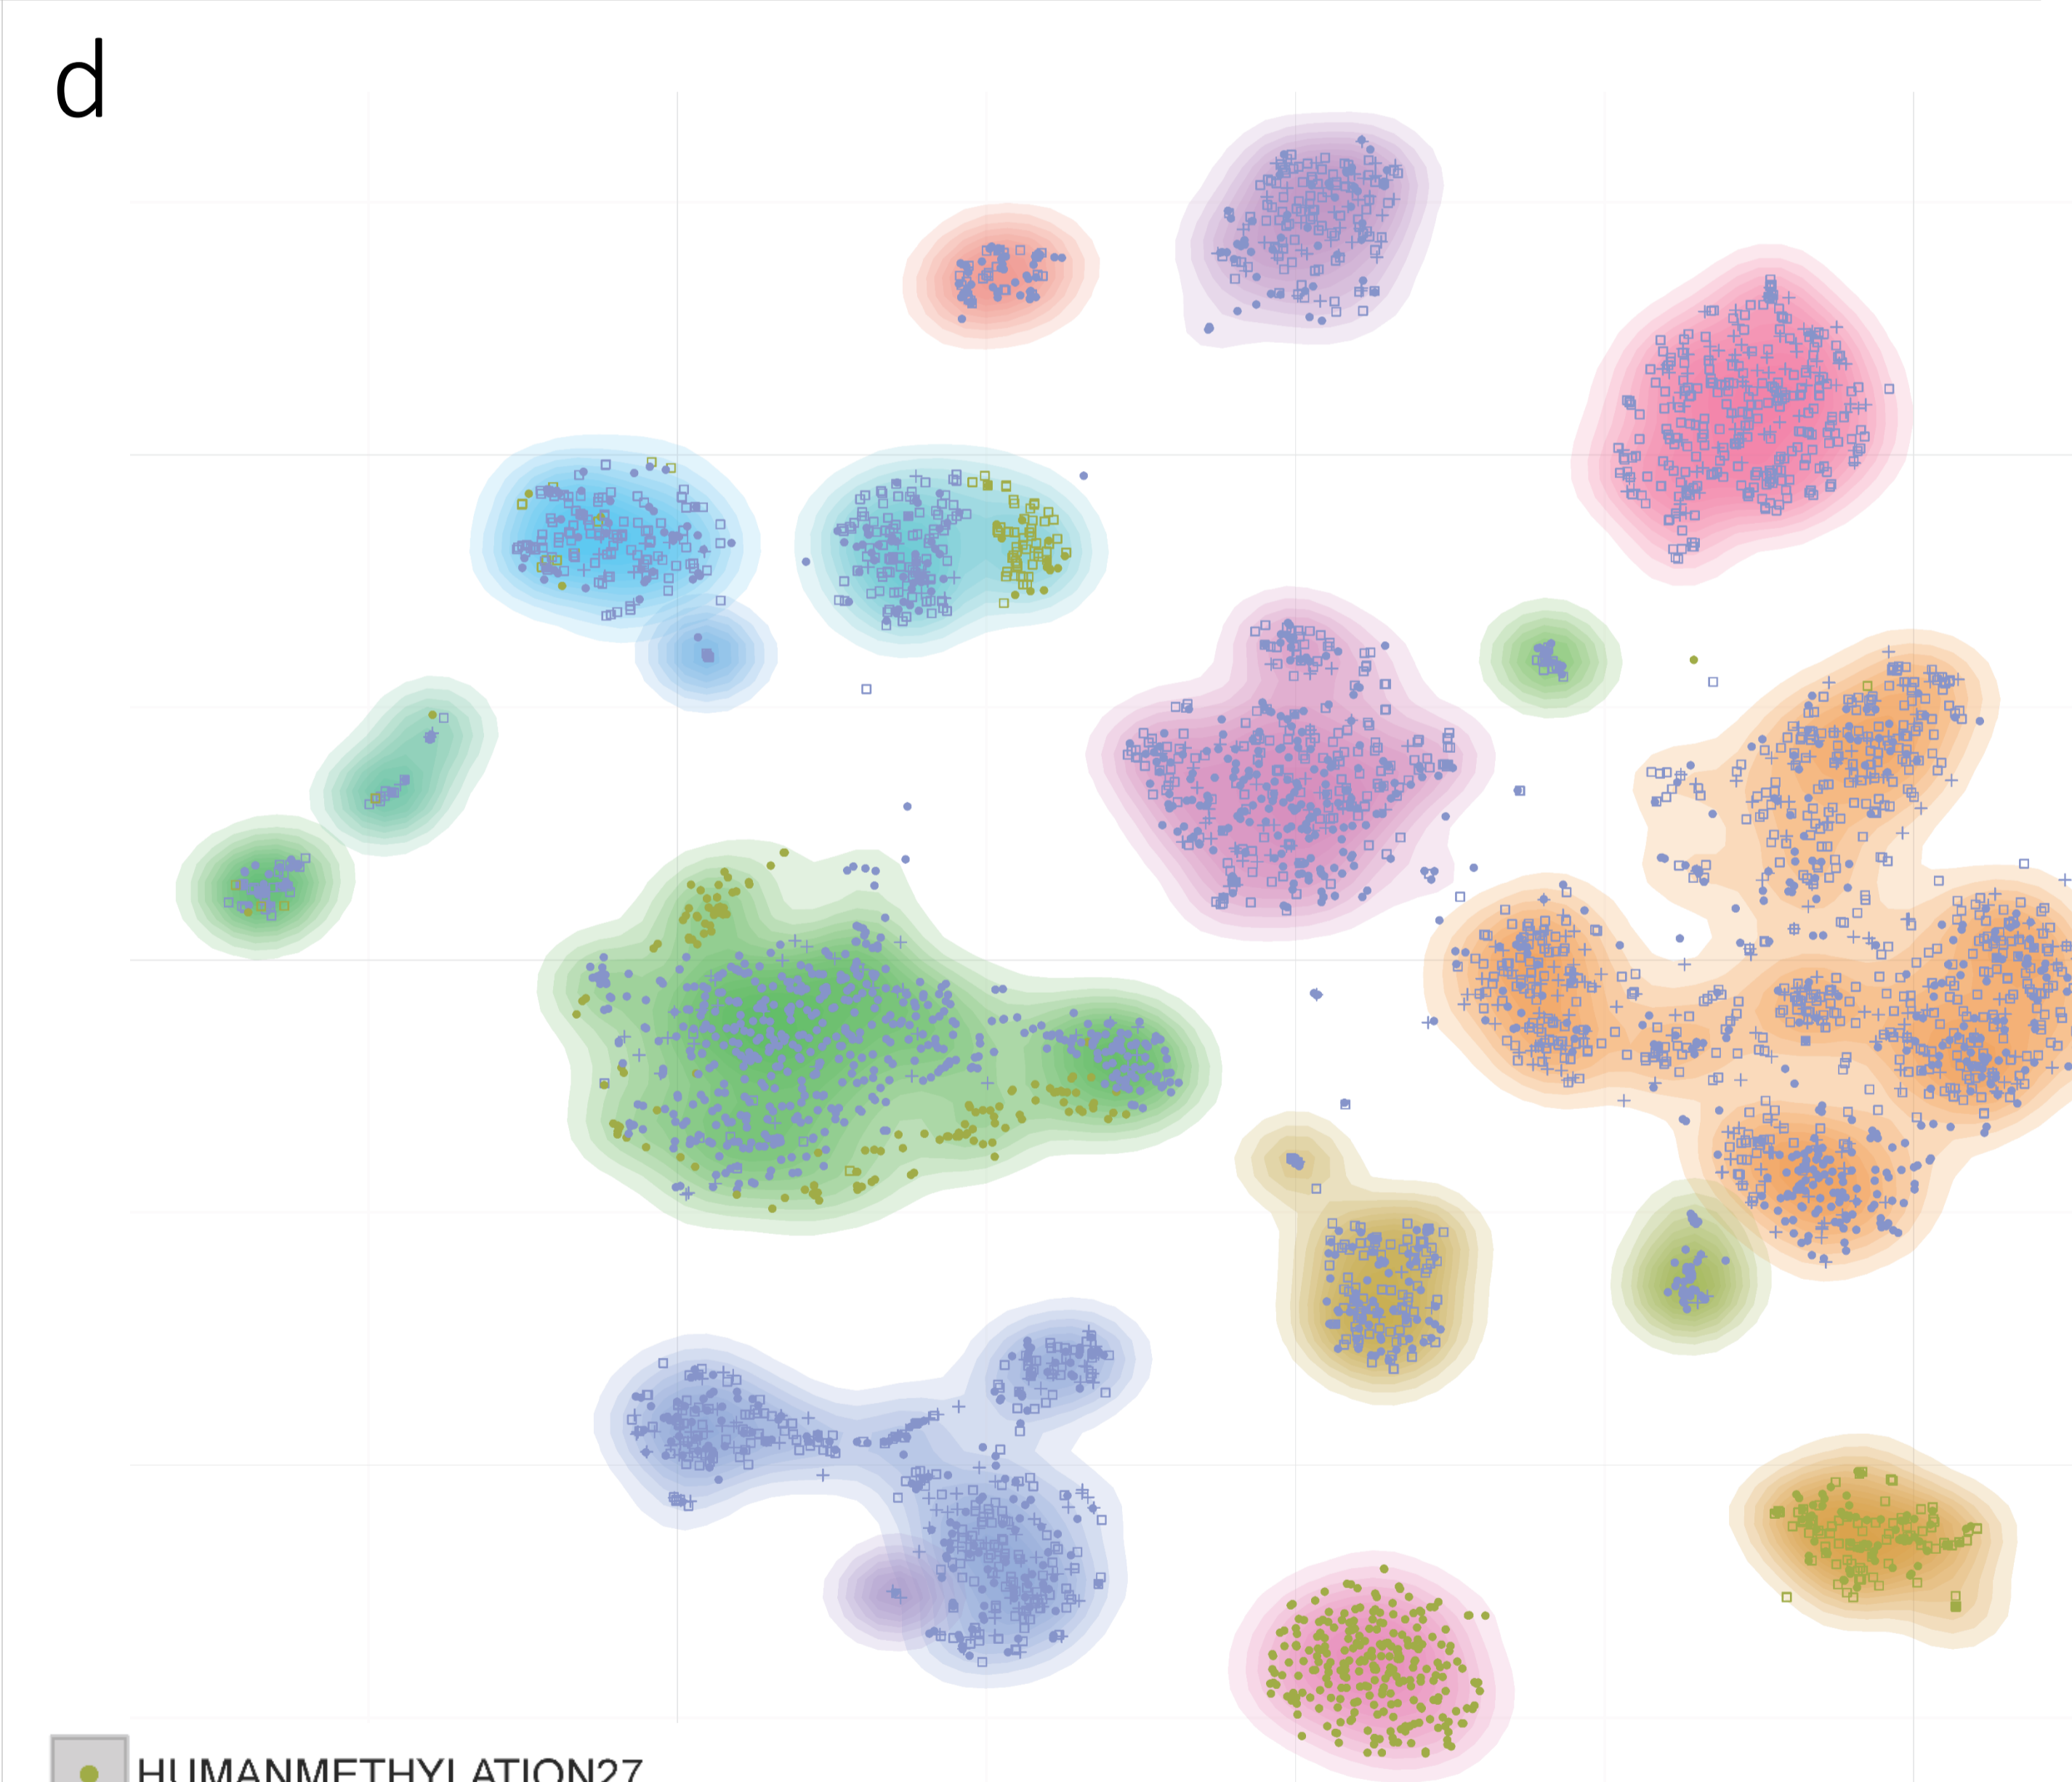

Figure S18

$[k_x=1..250]$  Nearest Neighbors in MP-map

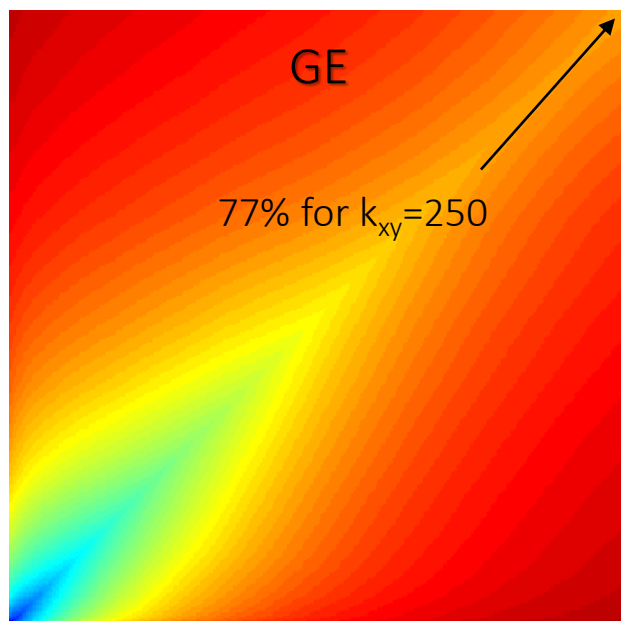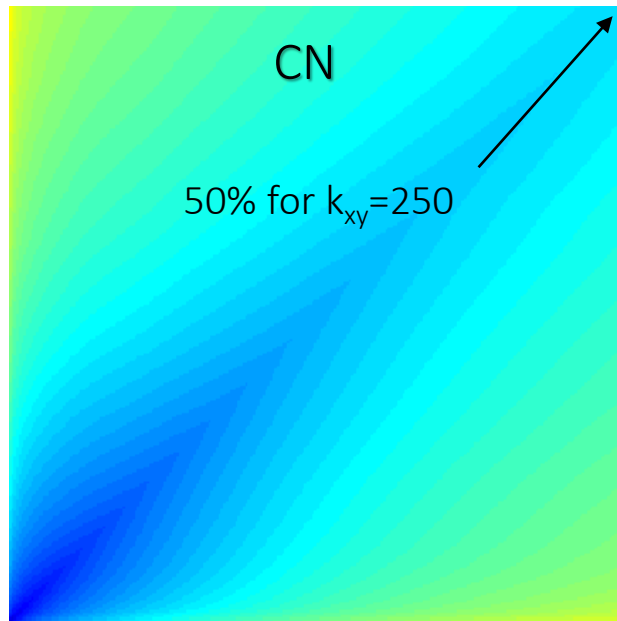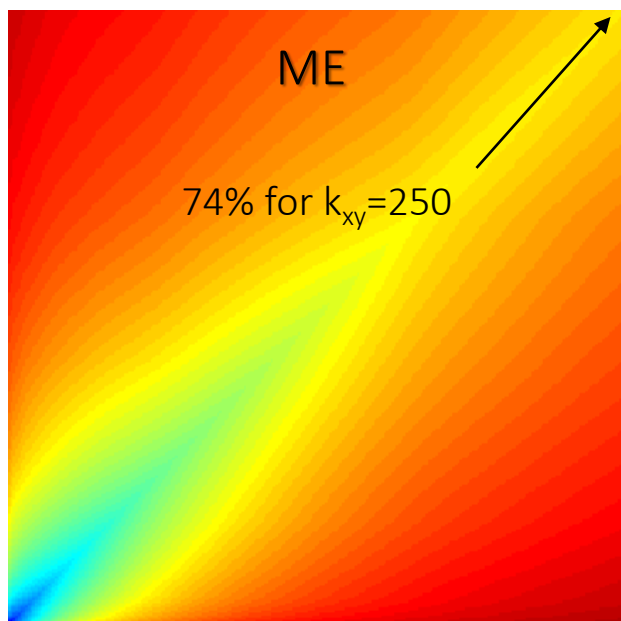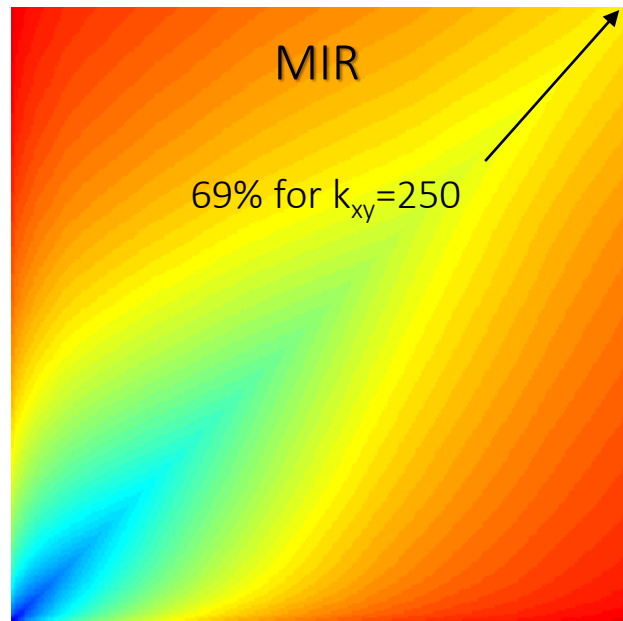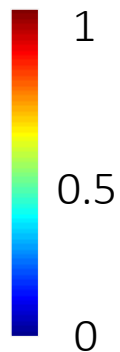

$[k_y=1..250]$  Nearest Neighbors  
In single platform map

Table S1

| Cancer tissues/Clustering algorithm | Low Dimensional Space          |          |                      |          |                           |          |                                         |            |                     |          | Low Dimensional PCA Space |          |                |          |                              |          | High dimensional PCA Space        |          |                                                |          |  |  |
|-------------------------------------|--------------------------------|----------|----------------------|----------|---------------------------|----------|-----------------------------------------|------------|---------------------|----------|---------------------------|----------|----------------|----------|------------------------------|----------|-----------------------------------|----------|------------------------------------------------|----------|--|--|
|                                     | MEREDITH (2D) and DBSCAN       |          | MEREDITH (2D) and HC |          | MEREDITH (2D) and k-means |          | MEREDITH (2D) and Mixture of Gaussians  |            | PCA(2D) and HC      |          | PCA(3D) and HC            |          | PCA(4D) and HC |          | Original space (200D) and HC |          | Original space (200D) and k-means |          | Original space (200D) and Mixture of Gaussians |          |  |  |
|                                     | P Enrichment                   | Cl label | P Enrichment         | Cl label | P Enrichment              | Cl label | P Enrichment                            | Cl label   | P Enrichment        | Cl label | P Enrichment              | Cl label | P Enrichment   | Cl label | P Enrichment                 | Cl label | P Enrichment                      | Cl label | P Enrichment                                   | Cl label |  |  |
| ACC                                 | 6.122E-158                     | 1        | 6.122E-158           | 1        | 2.195E-91                 | 11       | 2.195E-91                               | 11         | 2.352E-31           | 4        | 9.356E-40                 | 5        | 3.659E-50      | 2        | 4.589E-156                   | 2        | 1.559E-63                         | 2        | 5.82E-152                                      | 15       |  |  |
| BLCA                                | 2.604E-162                     | 2        | 9.468E-314           | 14       | 3.443E-307                | 15       | 9.844E-200                              | 8          | 6.048E-102          | 5        | 4.803E-80                 | 2        | 1.97E-54       | 4        | 1.412E-153                   | 9        | 2.621E-54                         | 1        | 0.001807,3.667e-31                             | 4,8      |  |  |
| BRCA                                | 0                              | 7        | 6.438E-179,0         | 9,10     | 0.241E-09                 | 1,14     | 2.712E-321,2.186E-91,6.911E-203         | 2,7,17     | 3.216E-308          | 2        | 6.634E-84                 | 4        | 6.982E-160     | 4        | 0.00271,0                    | 4,6      | 1.677E-159                        | 1        | 0.314E-88                                      | 3,11     |  |  |
| CESC                                | 1.116E-65,5.638E-59            | 2,5      | 4.589E-178,0.001676  | 6,14     | 1.609E-212                | 9        | 1.413E-158                              | 1          | 4.76E-90            | 5        | 9.279E-70                 | 2        | 8.389E-44      | 4        | 4.025E-127                   | 9        | 1.054E-43                         | 1        | 6.739E-61                                      | 4        |  |  |
| COAD                                | 5.488E-201                     | 4        | 5.726E-200           | 12       | 7.12E-171                 | 14       | 5.726E-200                              | 10         | 4.309E-05,2.706E-24 | 1,5      | 5.75E-37                  | 4        | 2.229E-25      | 4        | 1.408E-212                   | 3        | 3.143E-27                         | 1        | 6.251E-61,1.771E-112                           | 12,13    |  |  |
| DLBC                                | 4.055E-71                      | 6        | 6.843E-28            | 17       | 6.843E-28                 | 5        | 3.958E-58                               | 6          | 3.649E-15           | 1        | 5.916E-07                 | 4        | 0.000002456    | 4        | 7.032E-17                    | 9        | 0.000002529                       | 1        | 1.79E-67                                       | 14       |  |  |
| HNSC                                | 2.901E-318                     | 2        | 6.718E-296,1.408E-76 | 5,6      | 4.901E-09,2.179E-13,0     | 6,9,16   | 9.943E-40,1.48E-179                     | 1,8        | 2.531E-240          | 5        | 8.218E-279                | 2        | 1.848E-101     | 4        | 3.682E-303                   | 9        | 3.171E-101                        | 1        | 9.95E-248                                      | 4        |  |  |
| KICH                                | 2.295E-110,8.737E-12           | 8,9      | 2.207E-124           | 13       | 2.207E-124                | 10       | 2.207E-124                              | 4          | 5.66E-46            | 4        | 1.592E-19                 | 4        | 1.626E-47      | 2        | 2.446E-105                   | 1        | 1.162E-55                         | 2        | 1.56E-31                                       | 8        |  |  |
| KIRC                                | 0.0007566,0                    | 9,10     | 0.0009809            | 8,13     | 0.0009809                 | 8,10     | 0.0009809                               | 3,4        | 5.55E-206           | 4        | 1.464E-69                 | 4        | 2.434E-189     | 2        | 6.523E-250                   | 5        | 2.828E-224                        | 2        | 6.01E-120                                      | 6        |  |  |
| KIRP                                | 3.066E-05,3.912E-281,5.919E-13 | 9,11,12  | 2.102E-302           | 7        | 2.102E-302                | 2        | 2.102E-302                              | 9          | 5.272E-171          | 4        | 2.977E-52                 | 4        | 1.551E-151     | 2        | 9.458E-212                   | 5        | 2.118E-179                        | 2        | 3.277E-205,1.691E-07                           | 2,10     |  |  |
| LAML                                | 4.37E-295                      | 3        | 3.445E-308           | 15       | 3.445E-308                | 4        | 4.735E-165                              | 1          | 3.445E-308          | 3        | 3.445E-308                | 3        | 3.445E-308     | 1        | 3.445E-308                   | 10       | 3.445E-308                        | 5        | 8.84E-207                                      | 7        |  |  |
| LGCG                                | 0.1.864E-05                    | 13,14    | 8.158E-162,0         | 3,4      | 4.253E-165,0              | 7,13     | 3.02E-301,1.033E-43,7.448E-80           | 12,14,20   | 0                   | 7        | 0                         | 5        | 0              | 5        | 0                            | 12       | 0                                 | 4        | 0                                              | 5        |  |  |
| LIHC                                | 0                              | 15       | 0                    | 2        | 7.614E-266                | 11       | 7.614E-266                              | 11         | 5.13E-67,0.0001416  | 1,4      | 2.828E-54                 | 4        | 2.75E-137      | 2        | 0                            | 8        | 1.113E-307                        | 3        | 2.08E-270                                      | 9        |  |  |
| LUAD                                | 0                              | 16       | 0                    | 17       | 0                         | 5        | 2.91E-06,1.729E-87,1.155E-274,1.273E-53 | 6,15,16,18 | 1.217E-145          | 1        | 9.723E-69                 | 4        | 1.096E-90      | 4        | 0                            | 4        | 5.94E-93                          | 1        | 6.829E-55,8.529E-34                            | 6,8      |  |  |
| LUSC                                | 1.692E-91                      | 2        | 6.644E-267           | 11       | 8.373E-222                | 6        | 2.488E-260                              | 13         | 4.173E-14           | 5        | 1.241E-76                 | 2        | 2.024E-39      | 4        | 3.801E-86                    | 9        | 2.485E-39                         | 1        | 4.48E-46                                       | 4        |  |  |
| OV                                  | 0                              | 17       | 0                    | 16       | 0                         | 12       | 1.49E-307                               | 14         | 0                   | 6        | 0                         | 1        | 0              | 3        | 0                            | 11       | 0                                 | 6        | 1.29E-168                                      | 8        |  |  |
| PAAD                                | 5.796E-29                      | 4        | 7.31E-29             | 12       | 1.234E-25                 | 14       | 7.31E-29                                | 10         | 1.878E-11           | 1        | 0.000002216               | 4        | -              | -        | 6.579E-19                    | 4        | 0.00007216                        | 1        | 1.07E-15                                       | 6        |  |  |
| PRAD                                | 0                              | 18       | 0                    | 18       | 0                         | 3        | 0                                       | 18         | 9.365E-182          | 2        | 1.002E-97                 | 4        | 1.364E-71      | 4        | 0                            | 7        | 1.99E-71                          | 1        | 0                                              | 1        |  |  |
| READ                                | 2.44E-49                       | 4        | 3.685E-49            | 12       | 1.793E-43                 | 14       | 3.685E-49                               | 10         | 1.122E-10           | 5        | 2.322E-10                 | 4        | 8.484E-08      | 4        | 2.92E-51                     | 3        | 8.806E-08                         | 1        | 4.68E-51                                       | 13       |  |  |

Green color depicts (equal) highest cluster enrichment for cancer type

**Table S2:** Patient demographics and clinical characteristics of Acute Myeloid Leukemia patients in the 11 clusters

|                                 | Cl.1 (n=6) | P1              | Cl.2 (n=20) | P2              | Cl.3 (n=11) | P3              | Cl.4 (n=18) | P4              | Cl.5 (n=7) | P5              | Cl.6 (n=35) | P6              | Cl.7 (n=15) | P7              | Cl.8 (n=15) | P8              | Cl.9 (n=4) | P9           | Cl.10 (n=21) | P10            | Cl.11 (n=15) | P11             |          |
|---------------------------------|------------|-----------------|-------------|-----------------|-------------|-----------------|-------------|-----------------|------------|-----------------|-------------|-----------------|-------------|-----------------|-------------|-----------------|------------|--------------|--------------|----------------|--------------|-----------------|----------|
| <b>Age, years</b>               |            |                 |             |                 |             |                 |             |                 |            |                 |             |                 |             |                 |             |                 |            |              |              |                |              |                 |          |
| Median                          | 53         | 0.36            | 58          | 0.94            | 56          | 0.61            | 37          | <b>0.0003</b>   | 61         | 0.49            | 62          | 0.37            | 71          | <b>0.00055</b>  | 63          | 1               | 65         | 0.4          | 64           | 0.29           | 51           | 0.067           |          |
| Range                           | 22-77      |                 | 22-83       |                 | 23-76       |                 | 22-75       |                 | 45-77      |                 | 31-82       |                 | 44-82       |                 | 28-74       |                 | 42-78      |              | 18-89        |                | 30-75        |                 |          |
| <b>Sex, n (%)</b>               |            | 0.93            |             | 0.94            |             | 0.61            |             | 0.35            |            | 0.29            |             | 0.56            |             | 0.22            |             | 0.63            |            | 0.1          |              | 0.65           |              | 0.92            |          |
| Male                            | 2 (33%)    |                 | 8 (40%)     |                 | 6 (55%)     |                 | 11 (61%)    |                 | 5 (71%)    |                 | 19 (54%)    |                 | 10 (67%)    |                 | 8 (53%)     |                 | 4 (1e+02%) |              | 11 (52%)     |                | 6 (40%)      |                 |          |
| Female                          | 4 (67%)    |                 | 12 (60%)    |                 | 5 (45%)     |                 | 7 (39%)     |                 | 2 (29%)    |                 | 16 (46%)    |                 | 5 (33%)     |                 | 7 (47%)     |                 | 0 (0%)     |              | 10 (48%)     |                | 9 (60%)      |                 |          |
| <b>Blast percentage</b>         |            | 0.8             |             | 0.76            |             | 0.2             |             | 0.81            |            | 0.31            |             | 0.39            |             | 0.06            |             | 0.13            |            | 0.38         |              | 0.82           |              | 0.98            |          |
| Median                          | 0          |                 | 0           |                 | 0           |                 | 0           |                 | 0          |                 | 0           |                 | 0           |                 | 0           |                 | 0          |              | 0            |                | 0            |                 |          |
| Range                           | 0-1        |                 | 0-10        |                 | 0-0         |                 | 0-1         |                 | 0-0        |                 | 0-8         |                 | 0-6         |                 | 0-0         |                 | 0-6        |              | 0-2          |                | 0-1          |                 |          |
| <b>Lymphocytes</b>              |            | <b>0.0023</b>   |             | <b>0.0002</b>   |             | 0.69            |             | <b>0.04</b>     |            | 0.2             |             | 0.45            |             | 0.06            |             | 0.59            |            | 0.48         |              | 0.17           |              | <b>0.0052</b>   |          |
| Median                          | 87         |                 | 72          |                 | 48          |                 | 52          |                 | 0          |                 | 18          |                 | 12          |                 | 34          |                 | 25         |              | 14           |                | 2            |                 |          |
| Range                           | 43-97      |                 | okt-98      |                 | 0-70        |                 | 0-96        |                 | 0-87       |                 | 0-90        |                 | 0-83        |                 | 0-97        |                 | feb-51     |              | 0-90         |                | 0-68         |                 |          |
| <b>Monocyte</b>                 |            | 0.2             |             | 0.26            |             | 0.073           |             | 0.42            |            | 0.18            |             | 0.78            |             | 0.34            |             | 0.33            |            | 0.8          |              | 0.87           |              | 0.6             |          |
| Median                          | 0          |                 | 0           |                 | 1           |                 | 0           |                 | 0          |                 | 0           |                 | 0           |                 | 0           |                 | 1          |              | 0            |                | 0            |                 |          |
| Range                           | 0-1        |                 | 0-15        |                 | 0-11        |                 | 0-48        |                 | 0-2        |                 | 0-40        |                 | 0-14        |                 | 0-40        |                 | 0-4        |              | 0-8          |                | 0-8          |                 |          |
| <b>Neutrophil</b>               |            | 0.0091          |             | 0.2             |             | 0.48            |             | 0.31            |            | 0.64            |             | 0.72            |             | 0.061           |             | 0.47            |            | 0.85         |              | 0.089          |              | 0.15            |          |
| Median                          | 1          |                 | 4           |                 | 5           |                 | 5           |                 | 5          |                 | 7           |                 | 14          |                 | 4           |                 | 8          |              | 8            |                | 10           |                 |          |
| Range                           | 0-4        |                 | 0-35        |                 | 20-jan      |                 | 0-33        |                 | 20-jan     |                 | 0-69        |                 | 0-50        |                 | 0-94        |                 | feb-15     |              | 1-jan        |                | 0-62         |                 |          |
| <b>Promyelocyte</b>             |            | 0.18            |             | 0.58            |             | 0.31            |             | 0.25            |            | 0.85            |             | 0.27            |             | 0.69            |             | 0.12            |            | 0.28         |              | 0.27           |              | <b>0.0011</b>   |          |
| Median                          | 0          |                 | 0           |                 | 0           |                 | 0           |                 | 0          |                 | 0           |                 | 0           |                 | 0           |                 | 0          |              | 0            |                | 1            |                 |          |
| Range                           | 0-0        |                 | 0-2         |                 | 0-6         |                 | 0-18        |                 | 0-3        |                 | 0-8         |                 | 0-3         |                 | 0-3         |                 | 0-0        |              | 0-4          |                | 0-71         |                 |          |
| <b>Normal karyotype, n (%)</b>  | 4 (66.7%)  | 1               | 18 (90%)    | <b>0.039</b>    | 5 (45.5%)   | 1               | 11 (61.1%)  | 1               | 6 (85.7%)  | 0.76            | 32 (91.4%)  | <b>0.0016</b>   | 14 (93.3%)  | 0.27            | 8 (53.3%)   | 1               | 3 (75%)    | 1            | 17 (81%)     | <b>0.049</b>   | 8 (53.3%)    | 1               |          |
| <b>Complex karyotype, n (%)</b> | 0 (0%)     | 1               | 0 (0%)      | 1               | 0 (0%)      | 1               | 1 (5.56%)   | 0.95            | 0 (0%)     | 1               | 1 (2.86%)   | 1               | 12 (80%)    | <b>1.30E-09</b> | 1 (6.67%)   | 0.9             | 1 (25%)    | 0.38         | 5 (23.8%)    | 0.077          | 1 (6.67%)    | 0.92            |          |
| <b>Fab class</b>                |            |                 |             |                 |             |                 |             |                 |            |                 |             |                 |             |                 |             |                 |            |              |              |                |              |                 |          |
| M0                              | 0 (0%)     | 1               | 1 (5%)      | 0.88            | 0 (0%)      | 1               | 0 (0%)      | 1               | 2 (28.6%)  | 0.14            | 0 (0%)      | 1               | 3 (20%)     | 0.16            | 2 (13.3%)   | 0.43            | 0 (0%)     | 1            | 8 (38.1%)    | <b>0.00011</b> | 0 (0%)       | 1               |          |
| M1                              | 5 (83.3%)  | <b>2.80E-03</b> | 8 (40%)     | 0.06            | 2 (18.2%)   | 0.78            | 5 (27.8%)   | 0.41            | 0 (0%)     | 1               | 6 (17.1%)   | 0.89            | 2 (13.3%)   | 0.91            | 6 (40%)     | 0.23            | 2 (50%)    | 0.23         | 3 (14.3%)    | 0.91           | 0 (0%)       | 1               |          |
| M2                              | 1 (16.7%)  | 0.79            | 7 (35%)     | 0.13            | 1 (9.09%)   | 0.95            | 12 (66.7%)  | <b>2.80E-05</b> | 0 (0%)     | 1               | 4 (11.4%)   | 0.98            | 4 (26.7%)   | 0.46            | 6 (40%)     | 0.093           | 0 (0%)     | 1            | 3 (14.3%)    | 0.9            | 0 (0%)       | 1               |          |
| M3                              | 0 (0%)     | 1               | 0 (0%)      | 1               | 0 (0%)      | 1               | 0 (0%)      | 1               | 0 (0%)     | 1               | 0 (0%)      | 1               | 0 (0%)      | 1               | 0 (0%)      | 1               | 0 (0%)     | 1            | 0 (0%)       | 1              | 15 (100%)    | <b>1.10E-21</b> |          |
| M4                              | 0 (0%)     | 1               | 2 (10%)     | 0.95            | 8 (72.7%)   | <b>1.90E-04</b> | 1 (5.56%)   | 0.99            | 0 (0%)     | 1               | 14 (40%)    | <b>0.003</b>    | 2 (13.3%)   | 0.87            | 0 (0%)      | 1               | 1 (25%)    | 0.61         | 7 (33.3%)    | 0.12           | 0 (0%)       | 1               |          |
| M5                              | 0 (0%)     | 1               | 1 (5%)      | 0.9             | 0 (0%)      | 1               | 0 (0%)      | 1               | 5 (71.4%)  | <b>1.10E-04</b> | 11 (31.4%)  | <b>4.10E-05</b> | 0 (0%)      | 1               | 0 (0%)      | 1               | 0 (0%)     | 1            | 0 (0%)       | 1              | 0 (0%)       | 1               |          |
| M6                              | 0 (0%)     | 1               | 0 (0%)      | 1               | 0 (0%)      | 1               | 0 (0%)      | 1               | 0 (0%)     | 1               | 0 (0%)      | 1               | 1 (6.67%)   | 0.17            | 0 (0%)      | 1               | 1 (25%)    | <b>0.047</b> | 0 (0%)       | 1              | 0 (0%)       | 1               |          |
| M7                              | 0 (0%)     | 1               | 0 (0%)      | 1               | 0 (0%)      | 1               | 0 (0%)      | 1               | 0 (0%)     | 1               | 0 (0%)      | 1               | 3 (20%)     | <b>0.0006</b>   | 0 (0%)      | 1               | 0 (0%)     | 1            | 0 (0%)       | 1              | 0 (0%)       | 1               |          |
| <b>Abnormalities, n (%)</b>     |            |                 |             |                 |             |                 |             |                 |            |                 |             |                 |             |                 |             |                 |            |              |              |                |              |                 |          |
| FLT3 / NPM1+                    | 4 (66.7%)  | <b>0.002</b>    | 2 (10%)     | 0.73            | 0 (0%)      | 1               | 0 (0%)      | 1               | 1 (14.3%)  | 0.600           | 12 (34.3%)  | <b>4.80E-05</b> | 0 (0%)      | 1               | 1 (6.67%)   | 0.87            | 0 (0%)     | 1            | 0 (0%)       | 1              | 0 (0%)       | 1               |          |
| FLT3 <sup>ITD</sup> / NPM1wt    | 0 (0%)     | 1               | 3 (15%)     | 0.66            | 2 (18.2%)   | 0.56            | 2 (11.1%)   | 0.83            | 2 (28.6%)  | 0.32            | 8 (22.9%)   | 0.17            | 0 (0%)      | 1               | 1 (6.67%)   | 0.94            | 0 (0%)     | 1            | 2 (9.52%)    | 0.89           | 7 (46.7%)    | <b>0.0035</b>   |          |
| FLT3 <sup>ITD</sup> / NPM1+     | 2 (33.3%)  | 0.15            | 9 (45%)     | <b>6.10E-05</b> | 0 (0%)      | 1               | 0 (0%)      | 1               | 0 (0%)     | 1               | 9 (25.7%)   | <b>0.0088</b>   | 0 (0%)      | 1               | 0 (0%)      | 1               | 0 (0%)     | 1            | 0 (0%)       | 1              | 0 (0%)       | 1               |          |
| FLT3 / NPM1wt                   | 0 (0%)     | 1               | 6 (30%)     | 1               | 9 (81.8%)   | 0.11            | 16 (88.9%)  | <b>0.0056</b>   | 4 (57.1%)  | 0.72            | 6 (17.1%)   | 1               | 15 (100%)   | <b>3.10E-04</b> | 13 (86.7%)  | <b>0.022</b>    | 4 (100%)   | 0.17         | 19 (90.5%)   | <b>0.0013</b>  | 8 (53.3%)    | 0.79            |          |
| RAS                             | 1 (16.7%)  | 0.29            | 1 (5%)      | 0.69            | 0 (0%)      | 1               | 0 (0%)      | 1               | 0 (0%)     | 1               | 4 (11.4%)   | 0.093           | 1 (6.67%)   | 0.58            | 1 (6.67%)   | 0.58            | 0 (0%)     | 1            | 1 (4.76%)    | 0.71           | 0 (0%)       | 1               |          |
| IDH1                            | 4 (66.7%)  | <b>5.90E-04</b> | 0 (0%)      | 1               | 0 (0%)      | 1               | 0 (0%)      | 1               | 0 (0%)     | 1               | 3 (8.57%)   | 0.65            | 0 (0%)      | 1               | 7 (46.7%)   | <b>4.50E-05</b> | 0 (0%)     | 1            | 1 (4.76%)    | 0.88           | 0 (0%)       | 1               |          |
| inv(16)                         | 0 (0%)     | 1               | 0 (0%)      | 1               | 7 (63.6%)   | <b>5.20E-10</b> | 0 (0%)      | 1               | 0 (0%)     | 1               | 0 (0%)      | 1               | 0 (0%)      | 1               | 0 (0%)      | 1               | 0 (0%)     | 1            | 0 (0%)       | 1              | 0 (0%)       | 1               |          |
| t(15;17)                        | 0 (0%)     | 1               | 0 (0%)      | 1               | 0 (0%)      | 1               | 0 (0%)      | 1               | 0 (0%)     | 1               | 0 (0%)      | 1               | 0 (0%)      | 1               | 0 (0%)      | 1               | 0 (0%)     | 1            | 0 (0%)       | 1              | 14 (93.3%)   | <b>1.70E-19</b> |          |
| t(8;21)                         | 0 (0%)     | 1               | 0 (0%)      | 1               | 0 (0%)      | 1               | 7 (38.9%)   | <b>5.00E-08</b> | 0 (0%)     | 1               | 0 (0%)      | 1               | 0 (0%)      | 1               | 0 (0%)      | 1               | 0 (0%)     | 1            | 0 (0%)       | 1              | 0 (0%)       | 1               |          |
| Sq                              | 0 (0%)     | 1               | 0 (0%)      | 1               | 0 (0%)      | 1               | 1 (5.56%)   | 0.81            | 0 (0%)     | 1               | 0 (0%)      | 1               | 10 (66.7%)  | <b>7.60E-10</b> | 2 (13.3%)   | 0.36            | 0 (0%)     | 1            | 1 (4.76%)    | 0.86           | 0 (0%)       | 1               |          |
| 7q                              | 0 (0%)     | 1               | 0 (0%)      | 1               | 0 (0%)      | 1               | 1 (5.56%)   | 0.9             | 0 (0%)     | 1               | 1 (2.86%)   | 0.99            | 9 (60%)     | <b>1.40E-06</b> | 4 (26.7%)   | 0.073           | 1 (25%)    | 0.39         | 2 (9.52%)    | 0.73           | 1 (6.67%)    | 0.85            |          |
| Trisomy8                        | 0 (0%)     | 1               | 1 (5%)      | 0.9             | 1 (9.09%)   | 0.7             | 0 (0%)      | 1               | 1 (14.3%)  | 0.54            | 0 (0%)      | 1               | 5 (33.3%)   | <b>9.50E-03</b> | 5 (33.3%)   | <b>0.0095</b>   | 0 (0%)     | 1            | 2 (9.52%)    | 0.66           | 2 (13.3%)    | 0.47            |          |
| <b>Platform</b>                 |            |                 |             |                 |             |                 |             |                 |            |                 |             |                 |             |                 |             |                 |            |              |              |                |              |                 |          |
| SE                              | 3.05E-09   |                 | 9.64E-18    |                 | 2.73E-10    |                 | 3.68E-07    |                 | 8.81E-04   |                 | 7.68E-11    |                 | 1.08E-13    |                 |             |                 |            |              |              | 2.10E-09       |              | 1.14E-21        |          |
| ME                              | 1.97E-06   |                 | 1.57E-04    |                 | 3.04E-12    |                 | 9.79E-05    |                 | 1.29E-03   |                 | 2.54E-05    |                 | 2.93E-08    |                 |             |                 |            |              |              | 7.72E-05       |              | 1.34E-17        |          |
| CN                              |            |                 |             |                 |             |                 |             |                 |            |                 |             |                 |             |                 |             |                 |            |              |              |                |              |                 |          |
| MirExp                          | 1.00E-03   |                 | 1.05E-08    |                 | 3.29E-09    |                 | 2.23E-04    |                 |            |                 | 2.46E-09    |                 |             |                 |             |                 |            |              |              |                | 3.25E-04     |                 | 3.17E-13 |

Abbreviations: AML-rest, patients that are not in cluster # i; Number of cases (percentage), median (range) or missing values are depicted where appropriate; Fab class, morphological classification; M0, minimally differentiated; M1, without maturation; M2, with maturation; M3, hypergranular promyelocytic; M4, myelomonocytic; M5, (a) monoblastic, (b) monocytic; M6, erytroleukemia; AML, acute myeloid leukemia; FLT3ITD, FLT3 internal tandem duplication; NPM1+, nucleophosmin 1; wt, wild-type; neg, negative. P-values indicate the comparison of patients in Cluster # i versus the patients not in cluster # i (AML-rest); Note that percentages are solely based on non-missing values. \*P-values are computed using the Mann-Whitney U test (continuous variables) and 2-sided Fisher exact test (categorical variables).

| Table S3                             |                  |          |                           |          |                 |          |                |          |                              |          |
|--------------------------------------|------------------|----------|---------------------------|----------|-----------------|----------|----------------|----------|------------------------------|----------|
| Cancer tissues/ Clustering algorithm | MEREDITH         |          | Low Dimensional PCA Space |          |                 |          |                |          | High dimensional PCA Space   |          |
|                                      | P Enrichment     | Clust.nr | PCA(2D) and HC            |          | PCA(3D) and HC  |          | PCA(4D) and HC |          | Original space (200D) and HC |          |
|                                      |                  |          | P Enrichment              | Clust.nr | P Enrichment    | Clust.nr | P Enrichment   | Clust.nr | P Enrichment                 | Clust.nr |
| FLT3wt/NPM1+                         | 0.002, 4.8E-05   | 1,6      | 5.00E-05                  | 3        | 5.60E-05        | 5        | 1.50E-04       | 1        | 2.2-E04, 0.013               | 8,9      |
| FLT3ITD/NPM1wt                       | 0.0035           | 11       | -                         | -        | -               | -        | 0.014          | 3        | 0.0035                       | 15       |
| FLT3ITD/NPM1+                        | 6.1E-05, 8.8-E03 | 2,6      | 2.60E-08                  | 3        | 1.10E-07        | 5        | 1.50E-04       | 1        | 0.029, 2.7-E05               | 8,12     |
| FLT3wt/NPM1wt                        | 0.0056, 3.1-E04  | 4,7      | 8.7-E05, 2.2-E04          | 2,4      | 0.0018, 1.6-E05 | 3,4      | 3.00E-05       | 4        | 3.1-E05, 1.7-E04             | 2,11     |
| RAS                                  | -                | -        | -                         | -        | -               | -        | -              | -        | -                            | -        |
| IDH1                                 | 5.9-E04, 4.5-E05 | 1,8      | -                         | -        | -               | -        | -              | -        | 1.30E-05                     | 13       |
| inv(16)                              | 5.20E-10         | 3        | 3.50E-03                  | 4        | 1.30E-05        | 1        | 0.0035         | 2        | 1.90E-10                     | 9        |
| t(15;17)                             | 1.70E-19         | 11       | 2.80E-13                  | 1        | 0.0082, 7.2E-15 | 2,6      | 7.20E-15       | 4        | 1.70E-19                     | 15       |
| t(8;21)                              | 5.00E-08         | 4        | 3.50E-02                  | 4        | 0.0055          | 1        | 0.0035         | 4        | 1.30E-11                     | 4        |
| 5q                                   | 7.60E-10         | 7        | 1.40E-07                  | 2        | 1.00E-07        | 3        | 3.70E-07       | 3        | 0.019, 9.2E-12               | 1,2      |
| 7q                                   | 1.40E-06         | 7        | 6.10E-07                  | 2        | 0.00059, 0.048  | 3,4      | 1.90E-07       | 3        | 6.00E-08                     | 2        |
| Trisomy8                             | 9.5-E03, 9.5-E03 | 7,8      | 2.20E-03                  | 2        | 0.022           | 3        | 0.00025        | 3        | 0.028, 0.05                  | 1,2      |

Green color depicts highest cluster enrichment with subtype



**Table S4:** Patient demographics and clinical characteristics of Breast cancer patients in the 5 clusters

|                                 | Cl.1 (n=107) | P               | Cl.2 (n=69) | P2              | Cl.3 (n=82) | P3              | Cl.4 (n=92) | P4              | Cl.5 (n=213) | P5              |
|---------------------------------|--------------|-----------------|-------------|-----------------|-------------|-----------------|-------------|-----------------|--------------|-----------------|
| <b>Age, years</b>               |              | 0.67            |             | <b>0.00016</b>  |             | <b>0.04</b>     |             | 0.31            |              | 0.86            |
| median                          | 58           |                 | 67          |                 | 53          |                 | 56          |                 | 59           |                 |
| range                           | 39-90        |                 | 39-87       |                 | 33-86       |                 | 29-90       |                 | 27-90        |                 |
| <b>Sex, n (%)</b>               |              | 1               |             | 0.18            |             | 1               |             | 1               |              | 0.089           |
| Male                            | 0 (0%)       |                 | 2 (2.9%)    |                 | 0 (0%)      |                 | 0 (0%)      |                 | 5 (2.3%)     |                 |
| Female                          | 97 (91%)     |                 | 57 (83%)    |                 | 76 (93%)    |                 | 88 (96%)    |                 | 203 (95%)    |                 |
| <b>Menopause status, n (%)</b>  |              |                 |             |                 |             |                 |             |                 |              |                 |
| Indeterminate                   | 1 (0.935%)   | 0.19            | 0 (0%)      | 1               | 0 (0%)      | 1               | 0 (0%)      | 1               | 0 (0%)       | 1               |
| Peri                            | 3 (2.8%)     | 0.73            | 0 (0%)      | 1               | 5 (6.1%)    | 0.13            | 4 (4.35%)   | 0.38            | 7 (3.29%)    | 0.62            |
| Post                            | 56 (52.3%)   | 0.98            | 41 (59.4%)  | 0.67            | 57 (69.5%)  | 0.057           | 55 (59.8%)  | 0.66            | 135 (63.4%)  | 0.22            |
| Pre                             | 26 (24.3%)   | 0.15            | 8 (11.6%)   | 0.99            | 11 (13.4%)  | 0.97            | 19 (20.7%)  | 0.51            | 50 (23.5%)   | 0.085           |
| <b>Pathologic stage, n (%)</b>  |              |                 |             |                 |             |                 |             |                 |              |                 |
| Stage I                         | 5 (4.67%)    | 0.95            | 2 (2.9%)    | 0.98            | 5 (6.1%)    | 0.8             | 14 (15.2%)  | <b>0.0061</b>   | 18 (8.45%)   | 0.39            |
| Stage IA                        | 7 (6.54%)    | 0.69            | 4 (5.8%)    | 0.77            | 4 (4.88%)   | 0.88            | 6 (6.52%)   | 0.69            | 20 (9.39%)   | 0.092           |
| Stage IB                        | 1 (0.935%)   | 0.57            | 2 (2.9%)    | 0.075           | 0 (0%)      | 1               | 1 (1.09%)   | 0.51            | 0 (0%)       | 1               |
| Stage II                        | 5 (4.67%)    | <b>0.0078</b>   | 0 (0%)      | 1               | 0 (0%)      | 1               | 1 (1.09%)   | 0.76            | 2 (0.939%)   | 0.87            |
| Stage IIA                       | 16 (15%)     | 1               | 22 (31.9%)  | 0.43            | 38 (46.3%)  | <b>0.00072</b>  | 31 (33.7%)  | 0.26            | 64 (30%)     | 0.59            |
| Stage IIB                       | 23 (21.5%)   | 0.64            | 16 (23.2%)  | 0.48            | 20 (24.4%)  | 0.36            | 19 (20.7%)  | 0.71            | 48 (22.5%)   | 0.51            |
| Stage III                       | 0 (0%)       | 1               | 0 (0%)      | 1               | 0 (0%)      | 1               | 1 (1.09%)   | 0.30            | 1 (0.469%)   | 0.61            |
| Stage IIIA                      | 18 (16.8%)   | 0.15            | 3 (4.35%)   | 1               | 6 (7.32%)   | 0.98            | 9 (9.78%)   | 0.9             | 39 (18.3%)   | <b>0.0052</b>   |
| Stage IIIB                      | 2 (1.87%)    | 0.7             | 3 (4.35%)   | 0.17            | 0 (0%)      | 1               | 1 (1.09%)   | 0.89            | 6 (2.82%)    | 0.28            |
| Stage IIIC                      | 19 (17.8%)   | <b>1.90E-05</b> | 6 (8.7%)    | 0.36            | 2 (2.44%)   | 0.99            | 4 (4.35%)   | 0.92            | 9 (4.23%)    | 0.99            |
| Stage IV                        | 1 (0.935%)   | 0.47            | 1 (1.45%)   | 0.32            | 0 (0%)      | 1               | 1 (1.09%)   | 0.42            | 0 (0%)       | 1               |
| Stage X                         | 0 (0%)       | 1               | 0 (0%)      | 1               | 0 (0%)      | 1               | 0 (0%)      | 1               | 1 (0.469%)   | 0.38            |
| <b>Histological type, n (%)</b> |              |                 |             |                 |             |                 |             |                 |              |                 |
| Infiltrating Carcinoma NOS      | 0 (0%)       | 1               | 0 (0%)      | 1               | 1 (1.22%)   | 0.15            | 0 (0%)      | 1               | 0 (0%)       | 1               |
| Infiltrating Ductal Carcinoma   | 30 (28%)     | 1.00            | 22 (31.9%)  | 1.00            | 67 (81.7%)  | <b>1.40E-05</b> | 62 (67.4%)  | 0.11            | 163 (76.5%)  | <b>2.20E-09</b> |
| Infiltrating Lobular Carcinoma  | 63 (58.9%)   | <b>3.70E-21</b> | 23 (33.3%)  | <b>0.014</b>    | 1 (1.22%)   | 1               | 15 (16.3%)  | 0.95            | 22 (10.3%)   | 1               |
| Medullary Carcinoma             | 0 (0%)       | 1.00            | 0 (0%)      | 1               | 4 (4.88%)   | <b>0.0019</b>   | 1 (1.09%)   | 0.59            | 0 (0%)       | 1               |
| Mixed Histology                 | 3 (2.8%)     | 0.70            | 2 (2.9%)    | 0.67            | 1 (1.22%)   | 0.94            | 2 (2.17%)   | 0.82            | 10 (4.69%)   | 0.093           |
| Mucinous Carcinoma              | 1 (0.935%)   | 0.92            | 9 (13%)     | <b>6.20E-07</b> | 0 (0%)      | 1               | 1 (1.09%)   | 0.89            | 1 (0.469%)   | 1               |
| Other                           | 0 (0%)       | 1               | 3 (4.35%)   | 0.58            | 2 (2.44%)   | 0.89            | 7 (7.61%)   | 0.079           | 12 (5.63%)   | 0.15            |
| <b>ER/PR/HER2 status, n (%)</b> |              |                 |             |                 |             |                 |             |                 |              |                 |
| ER+                             | 90 (84.1%)   | <b>1.60E-09</b> | 55 (79.7%)  | <b>3.70E-06</b> | 9 (11%)     | 1               | 46 (50%)    | 1               | 179 (84%)    | <b>3.80E-15</b> |
| PR+                             | 79 (73.8%)   | <b>2.70E-05</b> | 51 (73.9%)  | <b>5.70E-05</b> | 6 (7.32%)   | 1               | 38 (41.3%)  | 1               | 166 (77.9%)  | <b>5.20E-13</b> |
| HER2+                           | 9 (8.41%)    | 0.99            | 6 (8.7%)    | 1               | 7 (8.54%)   | 0.99            | 18 (19.6%)  | 0.1             | 42 (19.7%)   | <b>0.00095</b>  |
| <b>Luminal A, n (%)</b>         | 33 (30.8%)   | <b>5.10E-06</b> | 21 (30.4%)  | <b>6.20E-04</b> | 3 (3.66%)   | 1               | 7 (7.61%)   | 1               | 41 (19.2%)   | 0.36            |
| ER-/PR+/HER2-                   | 0 (0%)       | 1               | 1 (1.45%)   | 0.23            | 1 (1.22%)   | 0.27            | 0 (0%)      | 1               | 0 (0%)       | 1               |
| ER+/PR-/HER2-                   | 2 (1.87%)    | 0.53            | 2 (2.9%)    | 0.3             | 2 (2.44%)   | 0.38            | 1 (1.09%)   | 0.82            | 2 (0.939%)   | 0.91            |
| ER+/PR+/HER2-                   | 31 (29%)     | <b>5.00E-06</b> | 18 (26.1%)  | <b>0.006</b>    | 0 (0%)      | 1               | 6 (6.52%)   | 1               | 39 (18.3%)   | 0.17            |
| <b>Luminal B, n (%)</b>         | 9 (8.41%)    | 0.95            | 6 (8.7%)    | 0.89            | 4 (4.88%)   | 1               | 11 (12%)    | 0.67            | 38 (17.8%)   | <b>1.60E-04</b> |
| ER-/PR+/HER2+                   | 0 (0%)       | 1               | 0 (0%)      | 1               | 2 (2.44%)   | 0.1             | 0 (0%)      | 1               | 2 (0.939%)   | 0.48            |
| ER+/PR-/HER2+                   | 1 (0.935%)   | 0.92            | 2 (2.9%)    | 0.44            | 2 (2.44%)   | 0.54            | 2 (2.17%)   | 0.64            | 5 (2.35%)    | 0.49            |
| ER+/PR+/HER2+                   | 8 (7.48%)    | 0.83            | 4 (5.8%)    | 0.92            | 0 (0%)      | 1               | 9 (9.78%)   | 0.56            | 31 (14.6%)   | <b>0.00017</b>  |
| <b>HER2-type, n (%)</b>         |              |                 |             |                 |             |                 |             |                 |              |                 |
| ER-/PR-/HER2+                   | 0 (0%)       | 1               | 0 (0%)      | 1               | 3 (3.66%)   | 0.33            | 7 (7.61%)   | <b>0.0035</b>   | 4 (1.88%)    | 0.84            |
| <b>Basal, n (%)</b>             |              |                 |             |                 |             |                 |             |                 |              |                 |
| ER-/PR-/HER2-                   | 0 (0%)       | 1               | 0 (0%)      | 1               | 22 (26.8%)  | <b>3.90E-14</b> | 13 (14.1%)  | <b>1.50E-03</b> | 0 (0%)       | 1               |
| <b>Platform overlap</b>         |              |                 |             |                 |             |                 |             |                 |              |                 |
| GE                              |              | <b>2.01E-23</b> |             | <b>1.27E-11</b> |             | <b>4.88E-88</b> |             | <b>3.28E-09</b> |              | <b>2.90E-31</b> |
| ME                              |              | <b>2.05E-20</b> |             | <b>7.48E-12</b> |             | <b>9.91E-79</b> |             | <b>5.58E-48</b> |              | <b>1.46E-36</b> |
| CN                              |              | <b>1.75E-10</b> |             | <b>6.05E-08</b> |             | <b>8.54E-67</b> |             | <b>1.75E-11</b> |              | <b>6.96E-26</b> |
| MIR                             |              | <b>4.06E-19</b> |             | <b>8.58E-27</b> |             | <b>1.62E-84</b> |             | <b>1.14E-04</b> |              | <b>2.37E-38</b> |
| <b>Platform contribution</b>    |              |                 |             |                 |             |                 |             |                 |              |                 |
| Various                         |              |                 |             | <b>1.40E-09</b> |             |                 |             |                 |              |                 |
| ME                              |              |                 |             |                 |             | <b>1.15E-16</b> |             | <b>7.71E-15</b> |              |                 |
| Any                             |              |                 |             | <b>1.77E-03</b> |             |                 |             |                 |              |                 |
| CN                              |              |                 |             |                 |             | <b>6.24E-05</b> |             |                 |              | <b>2.73E-03</b> |
| All                             |              | <b>2.67E-04</b> |             |                 |             |                 |             |                 |              | <b>1.07E-12</b> |

Menopause status is defined as following: Indeterminate (neither Pre or Postmenopausal), Peri (6-12 months since last menstrual period), Post (prior bilateral ovariectomy OR >12 mo since LMP with no prior hysterectomy), Pre (<6 months since LMP AND no prior bilateral ovariectomy AND not on estrogen replacement)

| Cancer tissues/ Clustering algorithm | MEREDITH     |          | Low Dimensional PCA Space |          |                |          |                |          | High dimensional PCA Space   |          |
|--------------------------------------|--------------|----------|---------------------------|----------|----------------|----------|----------------|----------|------------------------------|----------|
|                                      |              |          | PCA(2D) and HC            |          | PCA(3D) and HC |          | PCA(4D) and HC |          | Original space (200D) and HC |          |
|                                      | P Enrichment | Clust.nr | P Enrichment              | Clust.nr | P Enrichment   | Clust.nr | P Enrichment   | Clust.nr | P Enrichment                 | Clust.nr |
|                                      | ER+          | 3.80E-15 | 1,2,5                     | 2.20E-13 | 5              | 9.50E-08 | 5              | 5.70E-10 | 7                            | 1.00E-06 |
| PR+                                  | 5.20E-13     | 1,2,5    | 2.20E-08                  | 5        | 5.80E-06       | 5        | 5.40E-08       | 3        | 9.80E-05                     | 7        |
| HER2+                                | 0.00095      | 5        | 5.00E-02                  | 4        | 0.006          | 1        | 0.0031         | 1        | 0.0033                       | 6        |
| Luminal A                            | 5.10E-06     | 1        | 0.0019                    | 6        | 0.0089         | 4        | 0.0014         | 7        | 0.00025                      | 8        |
| Luminal B                            | 1.60E-04     | 5        | 0.013                     | 4        | 0.028          | 7        | 0.022          | 5        | 1.10E-04                     | 6        |
| HER2-type                            | 0.0035       | 4        | 0.0092                    | 2        | 0.019          | 1        | 0.032          | 9        | 2.00E-06                     | 5        |
| Basal                                | 3.90E-14     | 3        | 4.50E-08                  | 1        | 2.30E-11       | 7        | 3.80E-05       | 9        | 3.40E-12                     | 12       |

Green colored cell depicts highest cluster enrichment with subtype

**Table S6**

| <b>Gene-set</b>        | <b>Pathway</b>                                             | <b>BY <math>\leq</math> 0.05</b> |
|------------------------|------------------------------------------------------------|----------------------------------|
| Immunologic signatures | GSE36476_CTRL_VS_TSST_ACT_72H_MEMORY_CD4_TCELL_OLD_DN      | 7.54E-21                         |
| Immunologic signatures | GSE15750_DAY6_VS_DAY10_EFF_CD8_TCELL_UP                    | 1.25E-20                         |
| Immunologic signatures | GSE36476_CTRL_VS_TSST_ACT_72H_MEMORY_CD4_TCELL_YOUNG_DN    | 1.41E-17                         |
| Immunologic signatures | GSE15750_DAY6_VS_DAY10_TRAF6KO_EFF_CD8_TCELL_UP            | 3.82E-17                         |
| Immunologic signatures | GSE36476_CTRL_VS_TSST_ACT_40H_MEMORY_CD4_TCELL_OLD_DN      | 3.82E-17                         |
| Immunologic signatures | GSE36476_CTRL_VS_TSST_ACT_40H_MEMORY_CD4_TCELL_YOUNG_DN    | 6.71E-17                         |
| Immunologic signatures | GSE24634_TREG_VS_TCONV_POST_DAY7_IL4_CONVERSION_UP         | 1.21E-16                         |
| Immunologic signatures | GSE22886_UNSTIM_VS_IL2_STIM_NKCELL_DN                      | 9.31E-16                         |
| Immunologic signatures | GSE30962_PRIMARY_VS_SECONDARY_ACUTE_LCMV_INF_CD8_TCELL_UP  | 6.82E-15                         |
| Immunologic signatures | GSE24634_TEFF_VS_TCONV_DAY7_IN_CULTURE_UP                  | 1.27E-14                         |
| Immunologic signatures | GOLDRATH_EFF_VS_MEMORY_CD8_TCELL_UP                        | 3.37E-13                         |
| Immunologic signatures | GSE12845_IGD_POS_BLOOD_VS_PRE_GC_TONSIL_BCELL_DN           | 2.34E-12                         |
| Immunologic signatures | GSE29618_BCELL_VS_MDC_DN                                   | 3.94E-12                         |
| Immunologic signatures | GSE29614_CTRL_VS_DAY7_TIV_FLU_VACCINE_PBMCDN               | 1.45E-11                         |
| Immunologic signatures | GSE24634_IL4_VS_CTRL_TREATED_NAIVE_CD4_TCELL_DAY7_UP       | 1.83E-11                         |
| Immunologic signatures | GSE29614_DAY3_VS_DAY7_TIV_FLU_VACCINE_PBMCDN               | 2.55E-11                         |
| Immunologic signatures | GSE17974_0H_VS_24H_IN_VITRO_ACT_CD4_TCELL_DN               | 5.32E-11                         |
| All canonical pathways | REACTOME_CELL_CYCLE_MITOTIC                                | 1.04E-10                         |
| All canonical pathways | REACTOME_METABOLISM_OF_LIPIDS_AND_LIPOPROTEINS             | 1.04E-10                         |
| Immunologic signatures | GSE22886_UNSTIM_VS_IL15_STIM_NKCELL_DN                     | 3.18E-10                         |
| All canonical pathways | REACTOME_EXTRACELLULAR_MATRIX_ORGANIZATION                 | 3.74E-10                         |
| Immunologic signatures | GSE10325_LUPUS_BCELL_VS_LUPUS_MYELOID_DN                   | 5.14E-10                         |
| Immunologic signatures | GSE9988_ANTI_TREM1_AND_LPS_VS_VEHICLE_TREATED_MONOCYTES_DN | 5.58E-10                         |
| All canonical pathways | KEGG_VALINE_LEUCINE_AND_ISOLEUCINE_DEGRADATION             | 1.04E-09                         |
| All canonical pathways | REACTOME_CELL_CYCLE                                        | 2.47E-09                         |
| All canonical pathways | KEGG_COMPLEMENT_AND_COAGULATION_CASCADES                   | 2.74E-09                         |
| Immunologic signatures | GOLDRATH_NAIVE_VS_EFF_CD8_TCELL_DN                         | 2.92E-09                         |
| Immunologic signatures | GSE3982_MEMORY_CD4_TCELL_VS_TH2_DN                         | 4.16E-09                         |
| Immunologic signatures | GSE24634_TEFF_VS_TCONV_DAY5_IN_CULTURE_UP                  | 6.58E-09                         |
| Oncogenic signatures   | RB_P107_DN.V1_UP                                           | 9.88E-09                         |
| All canonical pathways | REACTOME_DNA_REPLICATION                                   | 1.49E-08                         |

|                        |                                                         |          |
|------------------------|---------------------------------------------------------|----------|
| All canonical pathways | REACTOME_AXON_GUIDANCE                                  | 1.54E-08 |
| All canonical pathways | REACTOME_COLLAGEN_FORMATION                             | 1.82E-08 |
| Oncogenic signatures   | CSR_LATE_UP.V1_UP                                       | 2.44E-08 |
| Oncogenic signatures   | RPS14_DN.V1_DN                                          | 2.44E-08 |
| Immunologic signatures | GSE10239_NAIVE_VS_DAY4.5_EFF_CD8_TCELL_DN               | 2.93E-08 |
| Immunologic signatures | GSE9988_LPS_VS_VEHICLE_TREATED_MONOCYTE_DN              | 5.32E-08 |
| Immunologic signatures | GSE7852_LN_VS_THYMUS_TCONV_DN                           | 6.49E-08 |
| All canonical pathways | REACTOME_MITOTIC_M_M_G1_PHASES                          | 6.83E-08 |
| All canonical pathways | REACTOME_DEVELOPMENTAL_BIOLOGY                          | 1.02E-07 |
| Immunologic signatures | GSE24634_TREG_VS_TCONV_POST_DAY10_IL4_CONVERSION_DN     | 1.06E-07 |
| Immunologic signatures | GSE30962_ACUTE_VS_CHRONIC_LCMV_PRIMARY_INF_CD8_TCELL_DN | 1.17E-07 |
| Immunologic signatures | GSE9988_ANTI_TREM1_VS_VEHICLE_TREATED_MONOCYTES_DN      | 1.17E-07 |
| Immunologic signatures | GSE3982_BCELL_VS_TH2_DN                                 | 1.42E-07 |
| Immunologic signatures | GSE22886_NAIVE_VS_IGM_MEMORY_BCELL_DN                   | 1.98E-07 |
| Immunologic signatures | GSE29618_BCELL_VS_MDC_DAY7_FLU_VACCINE_DN               | 1.98E-07 |
| Immunologic signatures | GSE3982_DC_VS_CENT_MEMORY_CD4_TCELL_UP                  | 2.03E-07 |
| Immunologic signatures | KAECH_DAY8_EFF_VS_MEMORY_CD8_TCELL_UP                   | 2.33E-07 |
| Immunologic signatures | GSE20715_0H_VS_48H_OZONE_TLR4_KO_LUNG_DN                | 2.39E-07 |
| Immunologic signatures | GSE13411_PLASMA_CELL_VS_MEMORY_BCELL_UP                 | 2.61E-07 |
| Immunologic signatures | GSE24634_TREG_VS_TCONV_POST_DAY7_IL4_CONVERSION_DN      | 2.68E-07 |
| Immunologic signatures | GSE24634_TREG_VS_TCONV_POST_DAY5_IL4_CONVERSION_UP      | 3.26E-07 |
| Immunologic signatures | GSE31082_CD4_VS_CD8_SP_THYMOCYTE_DN                     | 3.77E-07 |
| All canonical pathways | REACTOME_HEMOSTASIS                                     | 4.65E-07 |
| Immunologic signatures | GSE3982_MEMORY_CD4_TCELL_VS_TH1_DN                      | 5.70E-07 |
| Oncogenic signatures   | P53_DN.V1_UP                                            | 5.98E-07 |
| Immunologic signatures | GSE15930_NAIVE_VS_24H_IN_VITRO_STIM_INFAB_CD8_TCELL_DN  | 8.35E-07 |
| Immunologic signatures | GSE24634_TREG_VS_TCONV_POST_DAY3_IL4_CONVERSION_UP      | 8.35E-07 |
| Immunologic signatures | GSE15930_NAIVE_VS_24H_IN_VITRO_STIM_CD8_TCELL_DN        | 9.85E-07 |
| Immunologic signatures | GSE29618_BCELL_VS_MONOCYTE_DAY7_FLU_VACCINE_DN          | 9.85E-07 |
| Oncogenic signatures   | SNF5_DN.V1_UP                                           | 1.14E-06 |
| Immunologic signatures | GSE3982_EOSINOPHIL_VS_TH2_DN                            | 1.15E-06 |
| Immunologic signatures | GSE17721_LPS_VS_CPG_24H_BMDM_DN                         | 1.16E-06 |
| Immunologic signatures | GSE10325_LUPUS_CD4_TCELL_VS_LUPUS_MYELOID_DN            | 1.40E-06 |

|                        |                                                            |          |
|------------------------|------------------------------------------------------------|----------|
| All canonical pathways | KEGG_PATHOGENIC_ESCHERICHIA_COLI_INFECTION                 | 1.79E-06 |
| Oncogenic signatures   | MEL18_DN.V1_UP                                             | 1.85E-06 |
| Immunologic signatures | GSE12845_IGD_POS_VS_NEG_BLOOD_BCELL_DN                     | 1.91E-06 |
| Immunologic signatures | GSE22886_DAY0_VS_DAY7_MONOCYTE_IN_CULTURE_DN               | 1.93E-06 |
| Oncogenic signatures   | PRC2_EDD_UP.V1_UP                                          | 2.13E-06 |
| Immunologic signatures | GSE15930_NAIVE_VS_24H_IN_VITRO_STIM_IL12_CD8_TCELL_DN      | 2.29E-06 |
| Immunologic signatures | GSE20366_EX_VIVO_VS_HOMEOSTATIC_CONVERSION_TREG_DN         | 2.29E-06 |
| Immunologic signatures | GSE36476_CTRL_VS_TSST_ACT_16H_MEMORY_CD4_TCELL_OLD_DN      | 2.29E-06 |
| Immunologic signatures | KAECH_NAIVE_VS_DAY8_EFF_CD8_TCELL_DN                       | 2.65E-06 |
| Immunologic signatures | GSE12845_IGD_NEG_BLOOD_VS_PRE_GC_TONSIL_BCELL_DN           | 2.65E-06 |
| Immunologic signatures | GSE34205_HEALTHY_VS_RSV_INF_INFANT_PBMCDN                  | 2.65E-06 |
| Immunologic signatures | GSE11057_NAIVE_VS_EFF_MEMORY_CD4_TCELL_DN                  | 3.07E-06 |
| Immunologic signatures | GSE24634_NAIVE_CD4_TCELL_VS_DAY7_IL4_CONV_TREG_DN          | 3.07E-06 |
| Immunologic signatures | GSE3982_CENT_MEMORY_CD4_TCELL_VS_TH1_DN                    | 3.07E-06 |
| Immunologic signatures | GSE18791_CTRL_VS_NEWCASTLE_VIRUS_DC_18H_UP                 | 3.50E-06 |
| Immunologic signatures | GSE15930_NAIVE_VS_48H_IN_VITRO_STIM_CD8_TCELL_DN           | 3.52E-06 |
| Immunologic signatures | GSE8678_IL7R_LOW_VS_HIGH_EFF_CD8_TCELL_UP                  | 3.52E-06 |
| Immunologic signatures | GSE3982_EFF_MEMORY_CD4_TCELL_VS_TH2_DN                     | 4.22E-06 |
| Immunologic signatures | GSE12366_GC_BCELL_VS_PLASMA_CELL_UP                        | 4.91E-06 |
| Immunologic signatures | GSE17974_1H_VS_72H_UNTREATED_IN_VITRO_CD4_TCELL_DN         | 4.91E-06 |
| Immunologic signatures | GSE24142_EARLY_THYMIC_PROGENITOR_VS_DN2_THYMOCYTE_FETAL_DN | 4.91E-06 |
| Oncogenic signatures   | ESC_J1_UP_LATE.V1_UP                                       | 5.41E-06 |
| Oncogenic signatures   | LEF1_UP.V1_DN                                              | 5.41E-06 |
| Immunologic signatures | GSE17974_CTRL_VS_ACT_IL4_AND_ANTI_IL12_24H_CD4_TCELL_DN    | 5.76E-06 |
| Immunologic signatures | GSE22886_NAIVE_BCELL_VS_MONOCYTE_DN                        | 5.79E-06 |
| Immunologic signatures | GSE10325_BCELL_VS_MYELOID_DN                               | 6.62E-06 |
| Immunologic signatures | GSE14000_4H_VS_16H_LPS_DC_TRANSLATED_RNA_UP                | 6.62E-06 |
| Immunologic signatures | GSE20715_0H_VS_48H_OZONE_LUNG_DN                           | 6.62E-06 |
| Immunologic signatures | GSE30083_SP1_VS_SP4_THYMOCYTE_UP                           | 6.62E-06 |
| Immunologic signatures | GSE29614_CTRL_VS_TIV_FLU_VACCINE_PBMCDN                    | 7.29E-06 |
| Immunologic signatures | GSE10239_NAIVE_VS_KLRG1INT_EFF_CD8_TCELL_DN                | 7.48E-06 |
| Immunologic signatures | GSE30962_ACUTE_VS_CHRONIC_LCMV_SECONDARY_INF_CD8_TCELL_DN  | 7.48E-06 |
| Immunologic signatures | GSE9988_ANTI_TREM1_VS_CTRL_TREATED_MONOCYTES_DN            | 7.48E-06 |

|                        |                                                        |          |
|------------------------|--------------------------------------------------------|----------|
| Immunologic signatures | GSE9988_LOW_LPS_VS_VEHICLE_TREATED_MONOCYTE_DN         | 7.48E-06 |
| Immunologic signatures | GSE22886_DC_VS_MONOCYTE_UP                             | 8.95E-06 |
| Immunologic signatures | GSE10239_NAIVE_VS_KLRG1HIGH_EFF_CD8_TCELL_DN           | 1.01E-05 |
| Immunologic signatures | GSE11864_CSF1_IFNG_VS_CSF1_IFNG_PAM3CYS_IN_MAC_UP      | 1.01E-05 |
| Immunologic signatures | GSE12845_NAIVE_VS_PRE_GC_TONSIL_BCELL_DN               | 1.01E-05 |
| Immunologic signatures | GSE24634_TREG_VS_TCONV_POST_DAY5_IL4_CONVERSION_DN     | 1.01E-05 |
| Immunologic signatures | GSE24634_TREG_VS_TCONV_POST_DAY10_IL4_CONVERSION_UP    | 1.01E-05 |
| Immunologic signatures | GSE360_DC_VS_MAC_T_GONDII_DN                           | 1.01E-05 |
| All canonical pathways | REACTOME_PLATELET_ACTIVATION_SIGNALING_AND_AGGREGATION | 1.02E-05 |
| Immunologic signatures | GSE17721_0.5H_VS_12H_PAM3CSK4_BMDM_UP                  | 1.19E-05 |
| Immunologic signatures | GSE29618_PDC_VS_MDC_DAY7_FLU_VACCINE_DN                | 1.19E-05 |
| Immunologic signatures | GSE17721_POLYIC_VS_CPG_8H_BMDM_DN                      | 1.36E-05 |
| Immunologic signatures | GSE17721_0.5H_VS_12H_CPG_BMDM_UP                       | 1.36E-05 |
| Immunologic signatures | GSE17721_0.5H_VS_8H_CPG_BMDM_UP                        | 1.36E-05 |
| Immunologic signatures | GSE22886_NAIVE_VS_IGG_IGA_MEMORY_BCELL_DN              | 1.36E-05 |
| Immunologic signatures | GSE24634_TEFF_VS_TCONV_DAY10_IN_CULTURE_DN             | 1.36E-05 |
| All canonical pathways | REACTOME_BRANCHED_CHAIN_AMINO_ACID_CATABOLISM          | 1.42E-05 |
| All canonical pathways | PID_UPA_UPAR_PATHWAY                                   | 1.56E-05 |
| All canonical pathways | REACTOME_METABOLISM_OF_AMINO_ACIDS_AND_DERIVATIVES     | 1.56E-05 |
| All canonical pathways | KEGG_PROPANOATE_METABOLISM                             | 1.58E-05 |
| Immunologic signatures | GSE17721_ALL_VS_24H_PAM3CSK4_BMDM_UP                   | 1.60E-05 |
| Immunologic signatures | GSE24634_NAIVE_CD4_TCELL_VS_DAY10_IL4_CONV_TREG_DN     | 1.60E-05 |
| All canonical pathways | REACTOME_COMPLEMENT_CASCADE                            | 1.70E-05 |
| Immunologic signatures | GSE17721_PAM3CSK4_VS_GADIQUIMOD_4H_BMDM_UP             | 1.84E-05 |
| Immunologic signatures | GSE17721_LPS_VS_GARDIQUIMOD_24H_BMDM_DN                | 1.84E-05 |
| Immunologic signatures | GSE3982_DC_VS_TH1_DN                                   | 1.84E-05 |
| Immunologic signatures | GSE3982_NKCELL_VS_TH2_DN                               | 1.84E-05 |
| Immunologic signatures | GSE6269_E_COLI_VS_STREP_AUREUS_INF_PBMCDN              | 1.84E-05 |
| Immunologic signatures | GSE13411_NAIVE_BCELL_VS_PLASMA_CELL_DN                 | 2.13E-05 |
| Immunologic signatures | GSE27786_LIN_NEG_VS_NKCELL_UP                          | 2.13E-05 |
| Immunologic signatures | GSE3982_MAST_CELL_VS_CENT_MEMORY_CD4_TCELL_UP          | 2.13E-05 |
| Immunologic signatures | GSE9006_TYPE_1_VS_TYPE_2_DIABETES_PBMCDN               | 2.13E-05 |
| All canonical pathways | REACTOME_ADAPTIVE_IMMUNE_SYSTEM                        | 2.42E-05 |

|                        |                                                            |          |
|------------------------|------------------------------------------------------------|----------|
| Immunologic signatures | GSE24142_EARLY_THYMIC_PROGENITOR_VS_DN2_THYMOCYTE_ADULT_DN | 2.50E-05 |
| Immunologic signatures | GSE12366_GC_VS_MEMORY_BCELL_UP                             | 2.53E-05 |
| Oncogenic signatures   | MEK_UP.V1_UP                                               | 2.63E-05 |
| All canonical pathways | REACTOME_BIOLOGICAL_OXIDATIONS                             | 2.73E-05 |
| All canonical pathways | REACTOME_MITOTIC_PROMETAPHASE                              | 2.73E-05 |
| Immunologic signatures | GSE30083_SP2_VS_SP4_THYMOCYTE_DN                           | 3.54E-05 |
| Immunologic signatures | GSE3982_BCELL_VS_TH1_DN                                    | 3.54E-05 |
| Oncogenic signatures   | E2F1_UP.V1_UP                                              | 3.54E-05 |
| Immunologic signatures | GSE11057_PBMC_VS_MEM_CD4_TCELL_UP                          | 4.18E-05 |
| Immunologic signatures | GSE15930_NAIVE_VS_72H_IN_VITRO_STIM_IFNAB_CD8_TCELL_DN     | 4.18E-05 |
| Immunologic signatures | GSE9006_HEALTHY_VS_TYPE_2_DIABETES_PBMC_AT_DX_UP           | 4.18E-05 |
| Immunologic signatures | GSE29618_MONOCYTE_VS_MDC_DN                                | 4.86E-05 |
| Immunologic signatures | GSE22886_NAIVE_BCELL_VS_BM_PLASMA_CELL_DN                  | 4.91E-05 |
| Immunologic signatures | GSE17721_0.5H_VS_24H_CPG_BMDM_DN                           | 5.63E-05 |
| Immunologic signatures | GSE24142_DN2_VS_DN3_THYMOCYTE_FETAL_DN                     | 5.63E-05 |
| Immunologic signatures | GSE27786_LIN_NEG_VS_BCELL_UP                               | 5.66E-05 |
| Immunologic signatures | GSE37416_0H_VS_48H_F_TULARENSIS_LVS_NEUTROPHIL_UP          | 5.66E-05 |
| Immunologic signatures | GSE14000_UNSTIM_VS_16H_LPS_DC_TRANSLATED_RNA_UP            | 5.72E-05 |
| Immunologic signatures | GSE17721_POLYIC_VS_GARDIQUIMOD_24H_BMDM_DN                 | 6.46E-05 |
| Immunologic signatures | GSE18791_CTRL_VS_NEWCASTLE_VIRUS_DC_14H_UP                 | 6.51E-05 |
| Immunologic signatures | GSE20366_CD103_POS_VS_NEG_TREG_KLRG1NEG_UP                 | 6.51E-05 |
| Immunologic signatures | GSE27786_CD8_TCELL_VS_NEUTROPHIL_DN                        | 7.62E-05 |
| Immunologic signatures | GSE339_CD4POS_VS_CD4CD8DN_DC_DN                            | 7.62E-05 |
| Oncogenic signatures   | ESC_J1_UP_EARLY.V1_UP                                      | 8.37E-05 |
| Immunologic signatures | GSE17721_0.5H_VS_4H_CPG_BMDM_UP                            | 8.89E-05 |
| Immunologic signatures | GSE360_CTRL_VS_L_DONOVANI_DC_UP                            | 8.89E-05 |
| Immunologic signatures | GSE11057_EFF_MEM_VS_CENT_MEM_CD4_TCELL_UP                  | 8.99E-05 |
| Immunologic signatures | GSE13306_TREG_RA_VS_TCONV_RA_UP                            | 8.99E-05 |
| Immunologic signatures | GSE18791_CTRL_VS_NEWCASTLE_VIRUS_DC_10H_UP                 | 9.13E-05 |
| All canonical pathways | PID_INTEGRIN1_PATHWAY                                      | 9.15E-05 |
| All canonical pathways | KEGG_CELL_CYCLE                                            | 9.76E-05 |
| Immunologic signatures | GSE22886_NAIVE_CD8_TCELL_VS_DC_DN                          | 9.96E-05 |
| Immunologic signatures | GSE24634_TEFF_VS_TCONV_DAY3_IN_CULTURE_UP                  | 9.96E-05 |

|                        |                                                                   |           |
|------------------------|-------------------------------------------------------------------|-----------|
| Immunologic signatures | GSE24634_IL4_VS_CTRL_TREATED_NAIVE_CD4_TCELL_DAY10_DN             | 9.96E-05  |
| Immunologic signatures | GSE3982_MAC_VS_TH2_DN                                             | 9.96E-05  |
| Immunologic signatures | GSE29618_PRE_VS_DAY7_FLU_VACCINE_BCELL_UP                         | 0.000101  |
| Immunologic signatures | GSE9988_LPS_VS_LPS_AND_ANTI_TREM1_MONOCYTE_UP                     | 0.000101  |
| Immunologic signatures | GSE17974_0H_VS_4H_IN_VITRO_ACT_CD4_TCELL_DN                       | 0.0001029 |
| Immunologic signatures | GSE360_T_GONDII_VS_B_MALAYI_LOW_DOSE_DC_DN                        | 0.0001143 |
| Immunologic signatures | GSE17721_PAM3CSK4_VS_CPG_8H_BMDM_UP                               | 0.0001154 |
| Immunologic signatures | GSE3982_DC_VS_MAC_DN                                              | 0.0001154 |
| Immunologic signatures | GSE3982_EFF_MEMORY_CD4_TCELL_VS_TH1_DN                            | 0.0001154 |
| Immunologic signatures | GSE11057_CD4_CENT_MEM_VS_PBMC_DN                                  | 0.0001178 |
| All canonical pathways | REACTOME_PROTEIN_FOLDING                                          | 0.0001219 |
| Immunologic signatures | GSE17721_LPS_VS_PAM3CSK4_6H_BMDM_DN                               | 0.0001282 |
| Immunologic signatures | GSE24142_EARLY_THYMIC_PROGENITOR_VS_DN3_THYMOCYTE_UP              | 0.0001282 |
| Immunologic signatures | GSE24142_EARLY_THYMIC_PROGENITOR_VS_DN3_THYMOCYTE_FETAL_UP        | 0.0001282 |
| Immunologic signatures | GSE15930_STIM_VS_STIM_AND_IFNAB_48H_CD8_T_CELL_UP                 | 0.0001307 |
| Immunologic signatures | GSE22886_DAY1_VS_DAY7_MONOCYTE_IN_CULTURE_DN                      | 0.0001307 |
| All canonical pathways | PID_FOXM1PATHWAY                                                  | 0.0001338 |
| Immunologic signatures | GSE13306_TREG_VS_TCONV_DN                                         | 0.0001377 |
| Oncogenic signatures   | PRC2_EZH2_UP.V1_DN                                                | 0.0001459 |
| Immunologic signatures | GSE22886_NAIVE_CD4_TCELL_VS_48H_ACT_TH1_DN                        | 0.0001471 |
| Immunologic signatures | GSE3982_DC_VS_BCELL_UP                                            | 0.0001471 |
| Immunologic signatures | GSE7460_CTRL_VS_TGFB_TREATED_ACT_FOXP3_MUT_TCONV_UP               | 0.0001471 |
| Immunologic signatures | GSE7460_FOXP3_MUT_VS_HET_ACT_TCONV_UP                             | 0.0001471 |
| Immunologic signatures | GSE7852_TREG_VS_TCONV_FAT_DN                                      | 0.0001471 |
| Immunologic signatures | GSE9650_EFFECTOR_VS_MEMORY_CD8_TCELL_UP                           | 0.0001471 |
| All canonical pathways | PID_PLK1_PATHWAY                                                  | 0.0001478 |
| Immunologic signatures | GSE17974_2H_VS_72H_UNTREATED_IN_VITRO_CD4_TCELL_DN                | 0.0001491 |
| Immunologic signatures | GSE29618_PRE_VS_DAY7_POST_LAIV_FLU_VACCINE_BCELL_DN               | 0.0001491 |
| Immunologic signatures | GSE37416_0H_VS_24H_F_TULARENSIS_LVS_NEUTROPHIL_UP                 | 0.0001491 |
| All canonical pathways | REACTOME_NCAM_SIGNALING_FOR_NEURITE_OUT_GROWTH                    | 0.0001567 |
| Immunologic signatures | GSE1460_INTRATHYMIC_T_PROGENITOR_VS_NAIVE_CD4_TCELL_CORD_BLOOD_UP | 0.0001657 |
| Immunologic signatures | GSE30083_SP2_VS_SP3_THYMOCYTE_DN                                  | 0.0001657 |
| Immunologic signatures | GSE360_CTRL_VS_T_GONDII_MAC_UP                                    | 0.0001657 |



|                        |                                                                    |           |
|------------------------|--------------------------------------------------------------------|-----------|
| Immunologic signatures | GSE3982_MAC_VS_NKCELL_UP                                           | 0.0001657 |
| Immunologic signatures | GSE13738_RESTING_VS_BYSTANDER_ACTIVATED_CD4_TCELL_DN               | 0.0001684 |
| Immunologic signatures | GSE2826_WT_VS_BTK_KO_BCELL_DN                                      | 0.0001684 |
| Immunologic signatures | GSE360_L_DONOVANI_VS_T_GONDII_DC_DN                                | 0.0001684 |
| Immunologic signatures | GSE26928_EFF_MEM_VS_CENTR_MEM_CD4_TCELL_UP                         | 0.0001831 |
| All canonical pathways | KEGG_PPAR_SIGNALING_PATHWAY                                        | 0.0001863 |
| All canonical pathways | REACTOME_PHASE1_FUNCTIONALIZATION_OF_COMPOUNDS                     | 0.0001863 |
| All canonical pathways | REACTOME_G2_M_CHECKPOINTS                                          | 0.0001863 |
| Immunologic signatures | GSE1460_INTRATHYMIC_T_PROGENITOR_VS_NAIVE_CD4_TCELL_ADULT_BLOOD_UP | 0.0001866 |
| Immunologic signatures | GSE17721_0.5H_VS_24H_CPG_BMDM_UP                                   | 0.0001866 |
| Immunologic signatures | GSE5463_CTRL_VS_DEXAMETHASONE_TREATED_THYMOCYTE_UP                 | 0.0001866 |
| All canonical pathways | PID_HNF3BPATHWAY                                                   | 0.0001869 |
| All canonical pathways | REACTOME_IMMUNE_SYSTEM                                             | 0.0001869 |
| Immunologic signatures | GSE7764_IL15_TREATED_VS_CTRL_NK_CELL_24H_UP                        | 0.0001926 |
| All canonical pathways | KEGG_PEROXISOME                                                    | 0.0001937 |
| Immunologic signatures | GSE24142_EARLY_THYMIC_PROGENITOR_VS_DN3_THYMOCYTE_FETAL_DN         | 0.0002152 |
| Immunologic signatures | GSE29618_BCELL_VS_MONOCYTE_DN                                      | 0.0002152 |
| Immunologic signatures | GSE10239_MEMORY_VS_KLRG1INT_EFF_CD8_TCELL_DN                       | 0.0002187 |
| Immunologic signatures | GSE13229_IMM_VS_INTMATURE_NKCELL_UP                                | 0.0002187 |
| Immunologic signatures | GSE13306_TREG_VS_TCONV_SPLEEN_DN                                   | 0.0002187 |
| Immunologic signatures | GSE17721_LPS_VS_PAM3CSK4_24H_BMDM_DN                               | 0.0002187 |
| Immunologic signatures | GSE24142_DN2_VS_DN3_THYMOCYTE_FETAL_UP                             | 0.0002408 |
| Immunologic signatures | GSE339_CD8POS_VS_CD4CD8DN_DC_DN                                    | 0.0002408 |
| Immunologic signatures | GSE360_CTRL_VS_T_GONDII_DC_UP                                      | 0.0002408 |
| Immunologic signatures | GSE360_L_DONOVANI_VS_T_GONDII_MAC_DN                               | 0.0002408 |
| Immunologic signatures | GSE17721_POLYIC_VS_CPG_2H_BMDM_DN                                  | 0.0002414 |
| Immunologic signatures | GSE17721_POLYIC_VS_CPG_12H_BMDM_DN                                 | 0.0002414 |
| Immunologic signatures | GSE24142_EARLY_THYMIC_PROGENITOR_VS_DN3_THYMOCYTE_DN               | 0.0002414 |
| Immunologic signatures | GSE29618_PRE_VS_DAY7_POST_LAIV_FLU_VACCINE_BCELL_UP                | 0.0002414 |
| Immunologic signatures | GSE360_T_GONDII_VS_M_TUBERCULOSIS_MAC_UP                           | 0.0002414 |
| Immunologic signatures | GSE36392_EOSINOPHIL_VS_NEUTROPHIL_IL25_TREATED_LUNG_DN             | 0.0002414 |
| Immunologic signatures | GSE3982_MAC_VS_CENT_MEMORY_CD4_TCELL_UP                            | 0.0002414 |
| All canonical pathways | KEGG_FATTY_ACID_METABOLISM                                         | 0.0002483 |

|                        |                                                         |           |
|------------------------|---------------------------------------------------------|-----------|
| Immunologic signatures | GSE22886_NAIVE_BCELL_VS_BLOOD_PLASMA_CELL_DN            | 0.0002498 |
| Oncogenic signatures   | STK33_SKM_DN                                            | 0.0002542 |
| All canonical pathways | PID_SYNDECAN_1_PATHWAY                                  | 0.0002605 |
| Immunologic signatures | GSE12845_IGD_NEG_BLOOD_VS_DARKZONE_GC_TONSIL_BCELL_DN   | 0.0002755 |
| Immunologic signatures | GSE17721_LPS_VS_POLYIC_24H_BMDM_UP                      | 0.0002755 |
| Immunologic signatures | GSE24142_DN2_VS_DN3_THYMOCYTE_ADULT_UP                  | 0.0002755 |
| Immunologic signatures | GSE2826_WT_VS_XID_BCELL_UP                              | 0.0002755 |
| All canonical pathways | REACTOME_CELL_SURFACE_INTERACTIONS_AT_THE_VASCULAR_WALL | 0.0002815 |
| Immunologic signatures | GSE27786_ERYTHROBLAST_VS_NEUTROPHIL_UP                  | 0.0003158 |
| Immunologic signatures | GSE360_L_DONOVANI_VS_T_GONDII_DC_UP                     | 0.0003158 |
| Immunologic signatures | GSE3982_MAC_VS_BASOPHIL_UP                              | 0.0003158 |
| Immunologic signatures | GSE3982_NKCELL_VS_TH1_DN                                | 0.0003158 |
| All canonical pathways | REACTOME_NCAM1_INTERACTIONS                             | 0.0003194 |
| Oncogenic signatures   | BMI1_DN.V1_UP                                           | 0.0003205 |
| Immunologic signatures | GSE9988_LPS_VS_CTRL_TREATED_MONOCYTE_DN                 | 0.0003265 |
| Immunologic signatures | GSE9988_ANTI_TREM1_AND_LPS_VS_CTRL_TREATED_MONOCYTES_DN | 0.0003265 |
| Immunologic signatures | GSE15659_TREG_VS_TCONV_DN                               | 0.0003276 |
| Immunologic signatures | GSE1460_CORD_VS_ADULT_BLOOD_NAIVE_CD4_TCELL_UP          | 0.0003334 |
| Immunologic signatures | GSE2706_2H_VS_8H_R848_STIM_DC_UP                        | 0.0003334 |
| Immunologic signatures | GSE31082_DP_VS_CD4_SP_THYMOCYTE_UP                      | 0.0003334 |
| All canonical pathways | PID_INTEGRIN3_PATHWAY                                   | 0.0003427 |
| Immunologic signatures | GSE24142_EARLY_THYMIC_PROGENITOR_VS_DN2_THYMOCYTE_DN    | 0.0003507 |
| Immunologic signatures | GSE360_CTRL_VS_L_DONOVANI_MAC_UP                        | 0.0003507 |
| Immunologic signatures | GSE360_T_GONDII_VS_B_MALAYI_HIGH_DOSE_DC_DN             | 0.0003507 |
| Immunologic signatures | GSE7764_NKCELL_VS_SPLENOCYTE_DN                         | 0.0003507 |
| Immunologic signatures | GSE20715_WT_VS_TLR4_KO_LUNG_DN                          | 0.0003617 |
| Immunologic signatures | GSE32423_IL7_VS_IL4_MEMORY_CD8_TCELL_UP                 | 0.0003617 |
| Immunologic signatures | GSE3982_MAST_CELL_VS_TH2_UP                             | 0.0003617 |
| Immunologic signatures | GSE13411_IGM_MEMORY_BCELL_VS_PLASMA_CELL_DN             | 0.0003741 |
| Immunologic signatures | GSE31082_DN_VS_CD8_SP_THYMOCYTE_UP                      | 0.0003741 |
| Oncogenic signatures   | ESC_V6.5_UP_EARLY.V1_DN                                 | 0.0003813 |
| Immunologic signatures | GSE29618_MONOCYTE_VS_PDC_DAY7_FLU_VACCINE_UP            | 0.0003954 |
| Immunologic signatures | GSE339_CD8POS_VS_CD4CD8DN_DC_IN_CULTURE_DN              | 0.0003954 |

|                        |                                                        |           |
|------------------------|--------------------------------------------------------|-----------|
| Oncogenic signatures   | STK33_DN                                               | 0.0004014 |
| Immunologic signatures | GSE14769_20MIN_VS_360MIN_LPS_BMDM_UP                   | 0.0004069 |
| Immunologic signatures | GSE15930_NAIVE_VS_48H_IN_VITRO_STIM_IL12_CD8_TCELL_DN  | 0.0004069 |
| Immunologic signatures | GSE17721_0.5H_VS_8H_CPG_BMDM_DN                        | 0.0004069 |
| Immunologic signatures | GSE7852_THYMUS_VS_FAT_TCONV_UP                         | 0.0004069 |
| All canonical pathways | KEGG_FOCAL_ADHESION                                    | 0.0004103 |
| Immunologic signatures | GSE24142_DN2_VS_DN3_THYMOCYTE_UP                       | 0.0004498 |
| Immunologic signatures | GSE17721_POLYIC_VS_CPG_16H_BMDM_DN                     | 0.0004682 |
| Immunologic signatures | GSE339_EX_VIVO_VS_IN_CULTURE_CD8POS_DC_UP              | 0.0004682 |
| Immunologic signatures | GSE17974_0H_VS_72H_IN_VITRO_ACT_CD4_TCELL_DN           | 0.0004887 |
| Immunologic signatures | GSE19825_NAIVE_VS_DAY3_EFF_CD8_TCELL_DN                | 0.0005091 |
| Immunologic signatures | GSE360_LOW_DOSE_B_MALAYI_VS_M_TUBERCULOSIS_DC_UP       | 0.000511  |
| Immunologic signatures | GSE10325_CD4_TCELL_VS_MYELOID_DN                       | 0.0005258 |
| Immunologic signatures | GSE14350_TREG_VS_TEFF_DN                               | 0.0005258 |
| Immunologic signatures | GSE17721_4_VS_24H_CPG_BMDM_UP                          | 0.0005258 |
| Immunologic signatures | GSE22886_TH1_VS_TH2_12H_ACT_UP                         | 0.0005258 |
| Immunologic signatures | GSE7764_NKCELL_VS_SPLENOCYTE_UP                        | 0.0005258 |
| Immunologic signatures | GSE17721_LPS_VS_CPG_4H_BMDM_DN                         | 0.0005476 |
| Immunologic signatures | GSE27786_NKCELL_VS_MONO_MAC_DN                         | 0.0005476 |
| Oncogenic signatures   | RPS14_DN.V1_UP                                         | 0.0005599 |
| Oncogenic signatures   | TGFB_UP.V1_UP                                          | 0.0005599 |
| Oncogenic signatures   | KRAS.DF.V1_UP                                          | 0.0005889 |
| Immunologic signatures | GSE20715_WT_VS_TLR4_KO_24H_OZONE_LUNG_UP               | 0.0006008 |
| Immunologic signatures | GSE27786_NKTCELL_VS_ERYTHROBLAST_DN                    | 0.0006008 |
| Immunologic signatures | GSE17721_POLYIC_VS_PAM3CSK4_12H_BMDM_DN                | 0.0006297 |
| Oncogenic signatures   | HINATA_NFKB_MATRIX                                     | 0.000635  |
| Immunologic signatures | GSE17974_CTRL_VS_ACT_IL4_AND_ANTI_IL12_4H_CD4_TCELL_DN | 0.0006587 |
| Immunologic signatures | GSE1432_6H_VS_24H_IFNG_MICROGLIA_UP                    | 0.0006825 |
| Immunologic signatures | GSE27786_NEUTROPHIL_VS_MONO_MAC_DN                     | 0.0006825 |
| Immunologic signatures | GSE9037_CTRL_VS_LPS_4H_STIM_BMDM_UP                    | 0.0006825 |
| Immunologic signatures | GSE10325_BCELL_VS_LUPUS_BCELL_UP                       | 0.0007136 |
| Immunologic signatures | GSE25087_FETAL_VS_ADULT_TREG_UP                        | 0.0007136 |
| Oncogenic signatures   | LEF1_UP.V1_UP                                          | 0.0007206 |

|                        |                                                                  |           |
|------------------------|------------------------------------------------------------------|-----------|
| Immunologic signatures | GSE11864_UNTREATED_VS_CSF1_IFNG_PAM3CYS_IN_MAC_UP                | 0.0007759 |
| Immunologic signatures | GSE14769_UNSTIM_VS_120MIN_LPS_BMDM_UP                            | 0.0007759 |
| Immunologic signatures | GSE22886_NAIVE_CD8_TCELL_VS_MONOCYTE_DN                          | 0.0007759 |
| Immunologic signatures | GSE24634_IL4_VS_CTRL_TREATED_NAIVE_CD4_TCELL_DAY5_UP             | 0.0007759 |
| Immunologic signatures | GSE14308_TH1_VS_NATURAL_TREG_DN                                  | 0.0007912 |
| Immunologic signatures | GSE17974_0H_VS_6H_IN_VITRO_ACT_CD4_TCELL_DN                      | 0.0007912 |
| Immunologic signatures | GSE24634_TEFF_VS_TCONV_DAY10_IN_CULTURE_UP                       | 0.0007912 |
| Immunologic signatures | GSE25087_FETAL_VS_ADULT_TCONV_UP                                 | 0.0007912 |
| Immunologic signatures | GSE27786_BCELL_VS_NKTCELL_DN                                     | 0.0007912 |
| Immunologic signatures | GSE29618_LAIV_VS_TIV_FLU_VACCINE_DAY7_MONOCYTE_DN                | 0.0007912 |
| Immunologic signatures | GSE3982_CTRL_VS_LPS_4H_MAC_UP                                    | 0.0007912 |
| All canonical pathways | REACTOME_FATTY_ACID_TRIACYLGLYCEROL_AND_KETONE_BODY_METABOLISM   | 0.0008338 |
| Oncogenic signatures   | CYCLIN_D1_UP.V1_UP                                               | 0.0008731 |
| Oncogenic signatures   | BMI1_DN_MEL18_DN.V1_UP                                           | 0.0008731 |
| All canonical pathways | KEGG_BUTANOATE_METABOLISM                                        | 0.0008783 |
| Immunologic signatures | GSE17721_CPG_VS_GARDIQUIMOD_4H_BMDM_DN                           | 0.0009061 |
| Immunologic signatures | GSE3982_EOSINOPHIL_VS_MAC_DN                                     | 0.0009061 |
| Immunologic signatures | GSE7852_THYMUS_VS_FAT_TREG_DN                                    | 0.0009061 |
| Immunologic signatures | GSE11864_CSF1_VS_CSF1_PAM3CYS_IN_MAC_DN                          | 0.000908  |
| Immunologic signatures | GSE17721_CTRL_VS_LPS_0.5H_BMDM_UP                                | 0.0009458 |
| Immunologic signatures | GSE32423_MEMORY_VS_NAIVE_CD8_TCELL_IL7_UP                        | 0.0009458 |
| Oncogenic signatures   | PKCA_DN.V1_UP                                                    | 0.0009572 |
| Immunologic signatures | GSE3337_CTRL_VS_16H_IFNG_IN_CD8POS_DC_UP                         | 0.0009735 |
| Immunologic signatures | GSE17721_LPS_VS_GARDIQUIMOD_12H_BMDM_DN                          | 0.001004  |
| Immunologic signatures | GSE17721_0.5H_VS_8H_POLYIC_BMDM_UP                               | 0.001004  |
| Immunologic signatures | GSE22886_NAIVE_BCELL_VS_NEUTROPHIL_DN                            | 0.001004  |
| Immunologic signatures | GSE27786_CD8_TCELL_VS_NKCELL_UP                                  | 0.001004  |
| Immunologic signatures | GSE37416_0H_VS_12H_F_TULARENSIS_LVS_NEUTROPHIL_UP                | 0.001004  |
| Immunologic signatures | GSE3982_MAST_CELL_VS_DC_DN                                       | 0.001004  |
| Immunologic signatures | GSE39820_TGFBETA1_IL6_VS_TGFBETA1_IL6_IL23A_TREATED_CD4_TCELL_DN | 0.001004  |
| Immunologic signatures | GSE37416_12H_VS_24H_F_TULARENSIS_LVS_NEUTROPHIL_UP               | 0.001058  |
| Immunologic signatures | GSE17721_CTRL_VS_GARDIQUIMOD_4H_BMDM_UP                          | 0.001151  |
| Oncogenic signatures   | MYC_UP.V1_UP                                                     | 0.001185  |

|                        |                                                       |          |
|------------------------|-------------------------------------------------------|----------|
| Immunologic signatures | GSE17721_PAM3CSK4_VS_CPG_12H_BMDM_UP                  | 0.001215 |
| Immunologic signatures | GSE11864_CSF1_VS_CSF1_IFNG_PAM3CYS_IN_MAC_DN          | 0.001282 |
| Immunologic signatures | GSE17721_LPS_VS_CPG_0.5H_BMDM_UP                      | 0.001303 |
| Immunologic signatures | GSE27786_NKTCELL_VS_MONO_MAC_DN                       | 0.001303 |
| Immunologic signatures | GSE3982_MAC_VS_TH2_UP                                 | 0.001303 |
| Immunologic signatures | GSE13738_RESTING_VS_TCR_ACTIVATED_CD4_TCELL_DN        | 0.001363 |
| Immunologic signatures | GSE27786_LSK_VS_NKTCELL_UP                            | 0.001363 |
| Immunologic signatures | GSE27786_LSK_VS_NEUTROPHIL_UP                         | 0.001363 |
| Immunologic signatures | GSE27786_CD8_TCELL_VS_NKCELL_DN                       | 0.001363 |
| Immunologic signatures | GSE1432_CTRL_VS_IFNG_1H_MICROGLIA_UP                  | 0.001439 |
| Immunologic signatures | GSE17721_PAM3CSK4_VS_GADIQUIMOD_0.5H_BMDM_DN          | 0.001461 |
| Immunologic signatures | GSE360_DC_VS_MAC_L_DONOVANI_DN                        | 0.001461 |
| Oncogenic signatures   | GCNP_SHH_UP_LATE.V1_DN                                | 0.001531 |
| Immunologic signatures | GSE10239_KLRG1INT_VS_KLRG1HIGH_EFF_CD8_TCELL_UP       | 0.001532 |
| Immunologic signatures | GSE15324_ELF4_KO_VS_WT_NAIVE_CD8_TCELL_UP             | 0.001532 |
| Immunologic signatures | GSE17721_LPS_VS_POLYIC_8H_BMDM_UP                     | 0.001532 |
| Immunologic signatures | GSE17721_LPS_VS_GARDIQUIMOD_16H_BMDM_DN               | 0.001532 |
| All canonical pathways | REACTOME_MITOTIC_G1_G1_S_PHASES                       | 0.00154  |
| Immunologic signatures | GSE15930_NAIVE_VS_72H_IN_VITRO_STIM_IL12_CD8_TCELL_DN | 0.001621 |
| Immunologic signatures | GSE20715_WT_VS_TLR4_KO_48H_OZONE_LUNG_UP              | 0.001621 |
| Immunologic signatures | GSE20715_0H_VS_24H_OZONE_LUNG_DN                      | 0.001621 |
| Immunologic signatures | GSE24634_NAIVE_CD4_TCELL_VS_DAY5_IL4_CONV_TREG_DN     | 0.001621 |
| Immunologic signatures | GSE339_CD4POS_VS_CD8POS_DC_UP                         | 0.001621 |
| Immunologic signatures | GSE360_L_DONOVANI_VS_B_MALAYI_HIGH_DOSE_MAC_DN        | 0.001621 |
| Immunologic signatures | KAECH_DAY15_EFF_VS_MEMORY_CD8_TCELL_UP                | 0.001656 |
| Immunologic signatures | GSE11057_NAIVE_CD4_VS_PBMC_CD4_TCELL_DN               | 0.001656 |
| Immunologic signatures | GSE17721_LPS_VS_POLYIC_1H_BMDM_DN                     | 0.001656 |
| Immunologic signatures | GSE17721_LPS_VS_PAM3CSK4_2H_BMDM_DN                   | 0.001656 |
| Immunologic signatures | GSE17721_POLYIC_VS_CPG_4H_BMDM_DN                     | 0.001656 |
| Immunologic signatures | GSE24102_GRANULOCYSTIC_MDSC_VS_NEUTROPHIL_DN          | 0.001656 |
| Immunologic signatures | GSE26928_NAIVE_VS_CENT_MEMORY_CD4_TCELL_DN            | 0.001656 |
| Immunologic signatures | GSE2706_2H_VS_8H_R848_AND_LPS_STIM_DC_UP              | 0.001656 |
| Immunologic signatures | GSE27786_BCELL_VS_CD8_TCELL_DN                        | 0.001656 |

|                        |                                                            |          |
|------------------------|------------------------------------------------------------|----------|
| Immunologic signatures | GSE339_EX_VIVO_VS_IN_CULTURE_CD4CD8DN_DC_UP                | 0.001656 |
| Immunologic signatures | GSE3982_CENT_MEMORY_CD4_TCELL_VS_TH2_DN                    | 0.001656 |
| Immunologic signatures | GSE9650_GP33_VS_GP276_LCMV_SPECIFIC_EXHAUSTED_CD8_TCELL_DN | 0.001656 |
| All canonical pathways | REACTOME_G1_S_TRANSITION                                   | 0.001697 |
| Immunologic signatures | GSE6269_STREP_AUREUS_VS_STREP_PNEUMO_INF_PBMC_DN           | 0.001709 |
| All canonical pathways | REACTOME_CELL_CYCLE_CHECKPOINTS                            | 0.001712 |
| Oncogenic signatures   | EGFR_UP.V1_DN                                              | 0.001734 |
| Immunologic signatures | GSE24634_NAIVE_CD4_TCELL_VS_DAY10_IL4_CONV_TREG_UP         | 0.001738 |
| Immunologic signatures | GSE37416_CTRL_VS_24H_F_TULARENSIS_LVS_NEUTROPHIL_UP        | 0.001738 |
| Immunologic signatures | GSE7400_CTRL_VS_CSF3_IN_VIVO_TREATED_PBMC_DN               | 0.001738 |
| Immunologic signatures | KAECH_NAIVE_VS_DAY15_EFF_CD8_TCELL_DN                      | 0.001847 |
| Immunologic signatures | GSE11864_CSF1_IFNG_VS_CSF1_PAM3CYS_IN_MAC_UP               | 0.001847 |
| Immunologic signatures | GSE17721_PAM3CSK4_VS_GADIQUIMOD_8H_BMDM_UP                 | 0.001847 |
| Immunologic signatures | GSE24634_NAIVE_CD4_TCELL_VS_DAY3_IL4_CONV_TREG_DN          | 0.001847 |
| Immunologic signatures | GSE29618_LAIV_VS_TIV_FLU_VACCINE_DAY7_BCELL_DN             | 0.001847 |
| Immunologic signatures | GSE17721_POLYIC_VS_PAM3CSK4_12H_BMDM_UP                    | 0.001948 |
| Immunologic signatures | GSE17974_CTRL_VS_ACT_IL4_AND_ANTI_IL12_12H_CD4_TCELL_DN    | 0.001948 |
| Immunologic signatures | GSE37416_CTRL_VS_12H_F_TULARENSIS_LVS_NEUTROPHIL_UP        | 0.001948 |
| Oncogenic signatures   | HOXA9_DN.V1_DN                                             | 0.00205  |
| Oncogenic signatures   | BRCA1_DN.V1_DN                                             | 0.002059 |
| Oncogenic signatures   | KRAS.DF.V1_DN                                              | 0.002059 |
| Immunologic signatures | GOLDRATH_NAIVE_VS_MEMORY_CD8_TCELL_UP                      | 0.002059 |
| Immunologic signatures | GSE14769_UNSTIM_VS_240MIN_LPS_BMDM_UP                      | 0.002059 |
| Immunologic signatures | GSE17721_LPS_VS_POLYIC_24H_BMDM_DN                         | 0.002059 |
| Immunologic signatures | GSE17721_POLYIC_VS_PAM3CSK4_2H_BMDM_DN                     | 0.002059 |
| Immunologic signatures | GSE17721_POLYIC_VS_GARDIQUIMOD_16H_BMDM_DN                 | 0.002059 |
| Immunologic signatures | GSE3982_MAST_CELL_VS_BCELL_UP                              | 0.002059 |
| Immunologic signatures | GSE17721_PAM3CSK4_VS_CPG_4H_BMDM_UP                        | 0.002183 |
| Immunologic signatures | GSE3982_EFF_MEMORY_VS_CENT_MEMORY_CD4_TCELL_UP             | 0.002183 |
| All canonical pathways | PID_MYC_ACTIVPATHWAY                                       | 0.00221  |
| All canonical pathways | REACTOME_PHOSPHOLIPID_METABOLISM                           | 0.002213 |
| Oncogenic signatures   | CYCLIN_D1_KE_.V1_UP                                        | 0.002299 |
| Oncogenic signatures   | PRC2_EZH2_UP.V1_UP                                         | 0.002299 |

|                        |                                                              |          |
|------------------------|--------------------------------------------------------------|----------|
| Oncogenic signatures   | ESC_V6.5_UP_LATE.V1_UP                                       | 0.002299 |
| Immunologic signatures | GSE36476_YOUNG_VS_OLD_DONOR_MEMORY_CD4_TCELL_16H_TSST_ACT_UP | 0.002319 |
| All canonical pathways | KEGG_ECM_RECEPTOR_INTERACTION                                | 0.002322 |
| Immunologic signatures | GSE3982_MAST_CELL_VS_NKCELL_UP                               | 0.002322 |
| Immunologic signatures | GSE3982_NEUTROPHIL_VS_CENT_MEMORY_CD4_TCELL_UP               | 0.002322 |
| All canonical pathways | REACTOME_METABOLISM_OF_CARBOHYDRATES                         | 0.002414 |
| Immunologic signatures | GSE13411_NAIVE_VS_IGM_MEMORY_BCELL_DN                        | 0.00245  |
| Immunologic signatures | GSE17721_LPS_VS_CPG_2H_BMDM_DN                               | 0.00245  |
| Immunologic signatures | GSE25087_TREG_VS_TCONV_FETUS_UP                              | 0.00245  |
| Immunologic signatures | GSE37416_0H_VS_3H_F_TULARENSIS_LVS_NEUTROPHIL_DN             | 0.00245  |
| Oncogenic signatures   | PIGF_UP.V1_DN                                                | 0.002483 |
| Oncogenic signatures   | NFE2L2.V2                                                    | 0.002483 |
| Immunologic signatures | GSE15324_ELF4_KO_VS_WT_ACTIVATED_CD8_TCELL_DN                | 0.002583 |
| Immunologic signatures | GSE17721_12H_VS_24H_GARDIQUIMOD_BMDM_UP                      | 0.002583 |
| Immunologic signatures | GSE22886_NAIVE_CD4_TCELL_VS_DC_DN                            | 0.002583 |
| Immunologic signatures | GSE339_EX_VIVO_VS_IN_CULTURE_CD4POS_DC_UP                    | 0.002583 |
| Immunologic signatures | GSE3982_BASOPHIL_VS_TH1_DN                                   | 0.002583 |
| Immunologic signatures | GSE14308_TH2_VS_TH17_UP                                      | 0.002698 |
| Immunologic signatures | GSE17721_POLYIC_VS_PAM3CSK4_24H_BMDM_UP                      | 0.002698 |
| Immunologic signatures | GSE17721_LPS_VS_PAM3CSK4_16H_BMDM_DN                         | 0.002698 |
| Immunologic signatures | GSE29618_MONOCYTE_VS_PDC_UP                                  | 0.002698 |
| Immunologic signatures | GSE360_DC_VS_MAC_T_GONDII_UP                                 | 0.002698 |
| Immunologic signatures | GSE360_HIGH_VS_LOW_DOSE_B_MALAYI_DC_UP                       | 0.002698 |
| Immunologic signatures | GSE37416_0H_VS_3H_F_TULARENSIS_LVS_NEUTROPHIL_UP             | 0.002698 |
| Immunologic signatures | GSE7460_CD8_TCELL_VS_TREG_ACT_DN                             | 0.002698 |
| All canonical pathways | BIOCARTA_COMP_PATHWAY                                        | 0.002767 |
| Oncogenic signatures   | IL2_UP.V1_UP                                                 | 0.002957 |
| Immunologic signatures | GSE17721_CTRL_VS_CPG_2H_BMDM_DN                              | 0.00305  |
| Immunologic signatures | GSE27786_LSK_VS_CD4_TCELL_UP                                 | 0.00305  |
| Immunologic signatures | GSE339_CD8POS_VS_CD4CD8DN_DC_IN_CULTURE_UP                   | 0.00305  |
| Immunologic signatures | GSE8868_SPLEEN_VS_INTESTINE_CD11B_POS_CD11C_NEG_DC_DN        | 0.00305  |
| Oncogenic signatures   | VEGF_A_UP.V1_DN                                              | 0.003061 |
| Oncogenic signatures   | MTOR_UP.V1_UP                                                | 0.003187 |

|                        |                                                                |          |
|------------------------|----------------------------------------------------------------|----------|
| Immunologic signatures | GSE12366_GC_VS_NAIVE_BCELL_UP                                  | 0.003207 |
| Immunologic signatures | GSE13306_RA_VS_UNTREATED_MEM_CD4_TCELL_UP                      | 0.003207 |
| Immunologic signatures | GSE18791_UNSTIM_VS_NEWCATSLE_VIRUS_DC_10H_UP                   | 0.003207 |
| Immunologic signatures | GSE22886_NAIVE_TCELL_VS_DC_DN                                  | 0.003207 |
| Immunologic signatures | GSE2706_UNSTIM_VS_8H_LPS_AND_R848_DC_UP                        | 0.003207 |
| Immunologic signatures | GSE360_DC_VS_MAC_B_MALAYI_HIGH_DOSE_DN                         | 0.003207 |
| All canonical pathways | REACTOME_MRNA_SPLICING                                         | 0.003319 |
| Immunologic signatures | GSE11924_TFH_VS_TH17_CD4_TCELL_DN                              | 0.003354 |
| Immunologic signatures | GSE15930_NAIVE_VS_72H_IN_VITRO_STIM_TRICHOSTATINA_CD8_TCELL_DN | 0.003354 |
| Immunologic signatures | GSE17721_POLYIC_VS_PAM3CSK4_6H_BMDM_DN                         | 0.003354 |
| Immunologic signatures | GSE17721_PAM3CSK4_VS_GADIQUIMOD_12H_BMDM_UP                    | 0.003354 |
| Immunologic signatures | GSE22886_DAY0_VS_DAY1_MONOCYTE_IN_CULTURE_DN                   | 0.003354 |
| Immunologic signatures | GSE2826_WT_VS_XID_BCELL_DN                                     | 0.003354 |
| Immunologic signatures | GSE39820_CTRL_VS_TGFBETA1_IL6_CD4_TCELL_DN                     | 0.003354 |
| All canonical pathways | REACTOME_CYTOCHROME_P450_ARRANGED_BY_SUBSTRATE_TYPE            | 0.003446 |
| Immunologic signatures | GSE13411_SWITCHED_MEMORY_BCELL_VS_PLASMA_CELL_DN               | 0.003554 |
| Immunologic signatures | GSE14308_TH17_VS_INDUCED_TREG_DN                               | 0.003554 |
| Immunologic signatures | GSE17721_POLYIC_VS_PAM3CSK4_4H_BMDM_DN                         | 0.003554 |
| Immunologic signatures | GSE20366_CD103_KLRG1_DP_VS_DN_TREG_DN                          | 0.003554 |
| Immunologic signatures | GSE17721_CTRL_VS_LPS_24H_BMDM_DN                               | 0.003718 |
| Immunologic signatures | GSE17721_CTRL_VS_PAM3CSK4_12H_BMDM_UP                          | 0.003718 |
| Immunologic signatures | GSE17721_LPS_VS_POLYIC_12H_BMDM_UP                             | 0.003718 |
| Immunologic signatures | GSE3982_MAST_CELL_VS_NEUTROPHIL_DN                             | 0.003718 |
| Immunologic signatures | GSE3982_NEUTROPHIL_VS_TH1_DN                                   | 0.003718 |
| Immunologic signatures | GSE9006_TYPE_1_DIABETES_AT_DX_VS_1MONTH_POST_DX_PPMC_UP        | 0.003718 |
| Immunologic signatures | GSE18791_CTRL_VS_NEWCASTLE_VIRUS_DC_6H_UP                      | 0.003722 |
| Immunologic signatures | GSE2706_UNSTIM_VS_8H_R848_DC_UP                                | 0.003722 |
| All canonical pathways | REACTOME_GLYCEROPHOSPHOLIPID_BIOSYNTHESIS                      | 0.00386  |
| All canonical pathways | REACTOME_INTEGRATION_OF_ENERGY_METABOLISM                      | 0.00386  |
| All canonical pathways | REACTOME_S_PHASE                                               | 0.00386  |
| Immunologic signatures | GSE12366_GC_VS_NAIVE_BCELL_DN                                  | 0.003936 |
| Immunologic signatures | GSE17721_POLYIC_VS_GADIQUIMOD_12H_BMDM_DN                      | 0.003936 |
| Immunologic signatures | GSE3982_BCELL_VS_TH1_UP                                        | 0.003936 |



|                        |                                                               |          |
|------------------------|---------------------------------------------------------------|----------|
| Immunologic signatures | GSE15930_STIM_VS_STIM_AND_TRICHOSTATINA_48H_CD8_T_CELL_UP     | 0.00413  |
| Immunologic signatures | GSE24634_TREG_VS_TCONV_POST_DAY3_IL4_CONVERSION_DN            | 0.00413  |
| Immunologic signatures | GSE2826_XID_VS_BTK_KO_BCELL_DN                                | 0.00413  |
| Immunologic signatures | GSE29618_MONOCYTE_VS_MDC_UP                                   | 0.00413  |
| Oncogenic signatures   | PTEN_DN.V2_UP                                                 | 0.004155 |
| Immunologic signatures | GSE17974_0H_VS_2H_IN_VITRO_ACT_CD4_TCELL_DN                   | 0.004164 |
| Immunologic signatures | GSE1448_CTRL_VS_ANTI_VALPHA2_DP_THYMOCYTE_UP                  | 0.004368 |
| Immunologic signatures | GSE1460_NAIVE_CD4_TCELL_ADULT_BLOOD_VS_THYMIC_STROMAL_CELL_DN | 0.004368 |
| Immunologic signatures | GSE20366_EX_VIVO_VS_HOMEOSTATIC_CONVERSION_NAIVE_CD4_TCELL_DN | 0.004368 |
| Immunologic signatures | GSE27786_BCELL_VS_CD4_TCELL_UP                                | 0.004368 |
| Immunologic signatures | GSE9988_LOW_LPS_VS_CTRL_TREATED_MONOCYTE_DN                   | 0.004368 |
| All canonical pathways | REACTOME_PREFOLDIN_MEDIATED_TRANSFER_OF_SUBSTRATE_TO_CCT_TRIC | 0.004425 |
| Oncogenic signatures   | GCNP_SHH_UP_LATE.V1_UP                                        | 0.004565 |
| All canonical pathways | REACTOME_TRANSMEMBRANE_TRANSPORT_OF_SMALL_MOLECULES           | 0.004568 |
| Immunologic signatures | GSE17580_TREG_VS_TEFF_S_MANSONI_INF_UP                        | 0.004572 |
| Immunologic signatures | GSE17721_LPS_VS_PAM3CSK4_0.5H_BMDM_DN                         | 0.004572 |
| Immunologic signatures | GSE24142_EARLY_THYMIC_PROGENITOR_VS_DN2_THYMOCYTE_UP          | 0.004572 |
| Immunologic signatures | GSE27786_CD4_TCELL_VS_MONO_MAC_DN                             | 0.004572 |
| Immunologic signatures | GSE14000_UNSTIM_VS_4H_LPS_DC_UP                               | 0.00458  |
| Immunologic signatures | GSE17721_POLYIC_VS_GARDIQUIMOD_8H_BMDM_DN                     | 0.00458  |
| Immunologic signatures | GSE27786_LSK_VS_ERYTHROBLAST_DN                               | 0.00458  |
| Immunologic signatures | GSE3982_BASOPHIL_VS_NKCELL_UP                                 | 0.00458  |
| Immunologic signatures | GSE9037_CTRL_VS_LPS_4H_STIM_IRAK4_KO_BMDM_UP                  | 0.00458  |
| Immunologic signatures | GSE14308_TH2_VS_NATURAL_TREG_DN                               | 0.004756 |
| Immunologic signatures | GSE17721_CTRL_VS_CPG_4H_BMDM_UP                               | 0.004756 |
| Immunologic signatures | GSE17721_PAM3CSK4_VS_CPG_16H_BMDM_DN                          | 0.004756 |
| Immunologic signatures | GSE17721_POLYIC_VS_GARDIQUIMOD_4H_BMDM_DN                     | 0.004756 |
| Immunologic signatures | GSE17721_0.5H_VS_12H_POLYIC_BMDM_UP                           | 0.004756 |
| Immunologic signatures | GSE27786_LSK_VS_CD8_TCELL_UP                                  | 0.004756 |
| Immunologic signatures | GSE32423_CTRL_VS_IL7_MEMORY_CD8_TCELL_UP                      | 0.004756 |
| Immunologic signatures | GSE7460_TREG_VS_TCONV_ACT_WITH_TGFB_UP                        | 0.004756 |
| All canonical pathways | PID_AURORA_B_PATHWAY                                          | 0.004807 |
| All canonical pathways | REACTOME_MHC_CLASS_II_ANTIGEN_PRESENTATION                    | 0.004807 |

|                        |                                                              |          |
|------------------------|--------------------------------------------------------------|----------|
| All canonical pathways | REACTOME_METABOLISM_OF_PROTEINS                              | 0.004807 |
| All canonical pathways | REACTOME_ACTIVATION_OF_ATR_IN_RESPONSE_TO_REPLICATION_STRESS | 0.004807 |
| Immunologic signatures | GSE22886_CTRL_VS_LPS_24H_DC_UP                               | 0.004979 |
| Immunologic signatures | GSE24142_DN2_VS_DN3_THYMOCYTE_DN                             | 0.004979 |
| Immunologic signatures | GSE3982_EOSINOPHIL_VS_TH1_DN                                 | 0.004979 |
| Oncogenic signatures   | TBK1.DF_DN                                                   | 0.004983 |
| Immunologic signatures | GSE14308_TH1_VS_NAIVE_CD4_TCELL_UP                           | 0.005024 |
| Immunologic signatures | GSE17721_POLYIC_VS_PAM3CSK4_16H_BMDM_DN                      | 0.005024 |
| Immunologic signatures | GSE34205_RSV_VS_FLU_INF_INFANT_PBMC_DN                       | 0.005024 |
| Immunologic signatures | GSE9988_LOW_LPS_VS_ANTI_TREM1_AND_LPS_MONOCYTE_UP            | 0.005024 |
| Immunologic signatures | GSE11057_NAIVE_VS_MEMORY_CD4_TCELL_DN                        | 0.005168 |
| Immunologic signatures | GSE13306_RA_VS_UNTREATED_TCONV_UP                            | 0.005168 |
| Immunologic signatures | GSE14350_IL2RB_KO_VS_WT_TEFF_DN                              | 0.005168 |
| Immunologic signatures | GSE17721_CTRL_VS_POLYIC_12H_BMDM_DN                          | 0.005168 |
| Immunologic signatures | GSE17721_CTRL_VS_CPG_1H_BMDM_UP                              | 0.005168 |
| Immunologic signatures | GSE17721_12H_VS_24H_CPG_BMDM_UP                              | 0.005168 |
| Immunologic signatures | GSE20715_0H_VS_24H_OZONE_TLR4_KO_LUNG_UP                     | 0.005168 |
| Immunologic signatures | GSE24634_TEFF_VS_TCONV_DAY7_IN_CULTURE_DN                    | 0.005168 |
| Immunologic signatures | GSE30962_ACUTE_VS_CHRONIC_LCMV_PRIMARY_INF_CD8_TCELL_UP      | 0.005168 |
| Immunologic signatures | GSE36476_CTRL_VS_TSST_ACT_16H_MEMORY_CD4_TCELL_YOUNG_DN      | 0.005168 |
| Immunologic signatures | GSE3982_DC_VS_TH2_UP                                         | 0.005168 |
| Immunologic signatures | GSE17721_LPS_VS_POLYIC_2H_BMDM_UP                            | 0.005424 |
| All canonical pathways | REACTOME_PROCESSING_OF_CAPPED_INTRON_CONTAINING_PRE_MRNA     | 0.005496 |
| All canonical pathways | REACTOME_METABOLISM_OF_NUCLEOTIDES                           | 0.005496 |
| Immunologic signatures | GSE14308_NAIVE_CD4_TCELL_VS_NATURAL_TREG_UP                  | 0.005509 |
| Immunologic signatures | GSE15215_CD2_POS_VS_NEG_PDC_UP                               | 0.005509 |
| Immunologic signatures | GSE17974_2.5H_VS_72H_IL4_AND_ANTI_IL12_ACT_CD4_TCELL_DN      | 0.005509 |
| Oncogenic signatures   | RB_DN.V1_UP                                                  | 0.005518 |
| Immunologic signatures | GSE2706_R848_VS_R848_AND_LPS_8H_STIM_DC_UP                   | 0.005568 |
| Oncogenic signatures   | GKNP_SHH_UP_EARLY.V1_UP                                      | 0.005594 |
| Immunologic signatures | GSE1460_INTRATHYMIC_T_PROGENITOR_VS_THYMIC_STROMAL_CELL_UP   | 0.005618 |
| Immunologic signatures | GSE1460_INTRATHYMIC_T_PROGENITOR_VS_THYMIC_STROMAL_CELL_DN   | 0.005618 |
| Immunologic signatures | GSE15750_WT_VS_TRAF6KO_DAY10_EFF_CD8_TCELL_DN                | 0.005618 |

|                        |                                                                    |          |
|------------------------|--------------------------------------------------------------------|----------|
| Immunologic signatures | GSE17721_LPS_VS_CPG_0.5H_BMDM_DN                                   | 0.005618 |
| Immunologic signatures | GSE17721_LPS_VS_CPG_6H_BMDM_DN                                     | 0.005618 |
| Immunologic signatures | GSE17721_LPS_VS_CPG_16H_BMDM_DN                                    | 0.005618 |
| Immunologic signatures | GSE19825_CD24LOW_VS_IL2RA_HIGH_DAY3_EFF_CD8_TCELL_DN               | 0.005618 |
| Immunologic signatures | GSE20715_0H_VS_24H_OZONE_LUNG_UP                                   | 0.005618 |
| Immunologic signatures | GSE22886_UNSTIM_VS_STIM_MEMORY_TCELL_DN                            | 0.005618 |
| Immunologic signatures | GSE22886_NAIVE_CD4_TCELL_VS_12H_ACT_TH1_DN                         | 0.005618 |
| Immunologic signatures | GSE27786_LIN_NEG_VS_ERYTHROBLAST_DN                                | 0.005618 |
| Immunologic signatures | GSE27786_NKCELL_VS_NEUTROPHIL_UP                                   | 0.005618 |
| Immunologic signatures | GSE9650_NAIVE_VS_EFF_CD8_TCELL_DN                                  | 0.005618 |
| Immunologic signatures | GSE11864_CSF1_VS_CSF1_IFNG_IN_MAC_UP                               | 0.005719 |
| All canonical pathways | PID_AVB3_INTEGRIN_PATHWAY                                          | 0.005869 |
| Oncogenic signatures   | VEGF_A_UP.V1_UP                                                    | 0.005938 |
| Immunologic signatures | GSE14308_TH2_VS_INDUCED_TREG_DN                                    | 0.005984 |
| Immunologic signatures | GSE1460_INTRATHYMIC_T_PROGENITOR_VS_NAIVE_CD4_TCELL_ADULT_BLOOD_DN | 0.005984 |
| Immunologic signatures | GSE22886_NAIVE_CD4_TCELL_VS_NEUTROPHIL_DN                          | 0.005984 |
| Immunologic signatures | GSE3982_MAST_CELL_VS_BASOPHIL_UP                                   | 0.005984 |
| All canonical pathways | REACTOME_G_ALPHA_Z_SIGNALLING_EVENTS                               | 0.006141 |
| Immunologic signatures | GSE15930_NAIVE_VS_72H_IN_VITRO_STIM_CD8_TCELL_DN                   | 0.006177 |
| Immunologic signatures | GSE17721_12H_VS_24H_POLYIC_BMDM_DN                                 | 0.006177 |
| Immunologic signatures | GSE20366_TREG_VS_TCONV_DN                                          | 0.006177 |
| Immunologic signatures | GSE20366_EX_VIVO_VS_DEC205_CONVERSION_UP                           | 0.006177 |
| Immunologic signatures | GSE22886_NAIVE_BCELL_VS_DC_DN                                      | 0.006177 |
| Immunologic signatures | GSE339_CD4POS_VS_CD8POS_DC_DN                                      | 0.006177 |
| Immunologic signatures | GSE3982_DC_VS_NKCELL_UP                                            | 0.006177 |
| Immunologic signatures | GSE9037_WT_VS_IRAK4_KO_LPS_4H_STIM_BMDM_DN                         | 0.006177 |
| Immunologic signatures | GSE13485_DAY1_VS_DAY21_YF17D_VACCINE_PBMCDN                        | 0.006313 |
| Immunologic signatures | GSE2706_R848_VS_LPS_2H_STIM_DC_UP                                  | 0.006389 |
| Immunologic signatures | GSE22886_NAIVE_TCELL_VS_NKCELL_UP                                  | 0.006532 |
| Immunologic signatures | GSE22886_NAIVE_TCELL_VS_MONOCYTE_UP                                | 0.006532 |
| Immunologic signatures | GSE27786_BCELL_VS_NKCELL_DN                                        | 0.006532 |
| Immunologic signatures | GSE30962_PRIMARY_VS_SECONDARY_ACUTE_LCMV_INF_CD8_TCELL_DN          | 0.006532 |
| Immunologic signatures | GSE360_CTRL_VS_B_MALAYI_HIGH_DOSE_MAC_UP                           | 0.006532 |

|                        |                                                                 |          |
|------------------------|-----------------------------------------------------------------|----------|
| Immunologic signatures | GSE360_L_DONOVANI_VS_B_MALAYI_HIGH_DOSE_MAC_UP                  | 0.006532 |
| Immunologic signatures | GSE9988_ANTI_TREM1_VS_ANTI_TREM1_AND_LPS_MONOCYTE_UP            | 0.006532 |
| All canonical pathways | KEGG_ARGININE_AND_PROLINE_METABOLISM                            | 0.006777 |
| All canonical pathways | REACTOME_FORMATION_OF_TUBULIN_FOLDING_INTERMEDIATES_BY_CCT_TRIC | 0.006777 |
| Oncogenic signatures   | JNK_DN.V1_UP                                                    | 0.006778 |
| Oncogenic signatures   | PTEN_DN.V2_DN                                                   | 0.006782 |
| Oncogenic signatures   | ATF2_UP.V1_UP                                                   | 0.006798 |
| Immunologic signatures | GSE26669_CD4_VS_CD8_TCELL_IN_MLR_COSTIM_BLOCK_DN                | 0.006803 |
| Immunologic signatures | GSE339_CD8POS_VS_CD4CD8DN_DC_UP                                 | 0.006803 |
| Immunologic signatures | GSE360_T_GONDII_VS_B_MALAYI_HIGH_DOSE_MAC_DN                    | 0.006803 |
| Immunologic signatures | GSE11864_CSF1_VS_CSF1_PAM3CYS_IN_MAC_UP                         | 0.00698  |
| Immunologic signatures | GSE11057_CD4_EFF_MEM_VS_PBMC_UP                                 | 0.007221 |
| Immunologic signatures | GSE1460_NAIVE_CD4_TCELL_ADULT_BLOOD_VS_THYMIC_STROMAL_CELL_UP   | 0.007221 |
| Immunologic signatures | GSE17721_4H_VS_24H_POLYIC_BMDM_UP                               | 0.007221 |
| Immunologic signatures | GSE17721_0.5H_VS_24H_GARDIQUIMOD_BMDM_UP                        | 0.007221 |
| Immunologic signatures | GSE27786_LIN_NEG_VS_CD4_TCELL_UP                                | 0.007221 |
| Immunologic signatures | GSE27786_CD8_TCELL_VS_NEUTROPHIL_UP                             | 0.007221 |
| Immunologic signatures | GSE3982_DC_VS_EFF_MEMORY_CD4_TCELL_UP                           | 0.007221 |
| Immunologic signatures | GSE25087_FETAL_VS_ADULT_TREG_DN                                 | 0.00739  |
| All canonical pathways | REACTOME_RESPONSE_TO_ELEVATED_PLATELET_CYTOSOLIC_CA2_           | 0.00742  |
| Oncogenic signatures   | HOXA9_DN.V1_UP                                                  | 0.007473 |
| Oncogenic signatures   | TBK1.DF_UP                                                      | 0.007473 |
| Immunologic signatures | GSE20715_0H_VS_6H_OZONE_TLR4_KO_LUNG_UP                         | 0.007486 |
| Immunologic signatures | GSE29618_PDC_VS_MDC_DN                                          | 0.007486 |
| Immunologic signatures | GSE7852_LN_VS_FAT_TCONV_DN                                      | 0.007486 |
| Immunologic signatures | GSE14000_4H_VS_16H_LPS_DC_DN                                    | 0.007694 |
| Immunologic signatures | GSE27786_LIN_NEG_VS_BCELL_DN                                    | 0.007694 |
| Oncogenic signatures   | LTE2_UP.V1_UP                                                   | 0.007815 |
| Immunologic signatures | GSE11057_NAIVE_VS_CENT_MEMORY_CD4_TCELL_DN                      | 0.007908 |
| Immunologic signatures | GSE14308_TH17_VS_NAIVE_CD4_TCELL_UP                             | 0.007908 |
| Immunologic signatures | GSE17721_CTRL_VS_CPG_24H_BMDM_UP                                | 0.007908 |
| Immunologic signatures | GSE17721_LPS_VS_PAM3CSK4_4H_BMDM_DN                             | 0.007908 |
| Immunologic signatures | GSE17721_PAM3CSK4_VS_GADIQUIMOD_24H_BMDM_DN                     | 0.007908 |

|                        |                                                                            |          |
|------------------------|----------------------------------------------------------------------------|----------|
| Immunologic signatures | GSE24142_ADULT_VS_FETAL_EARLY_THYMIC_PROGENITOR_UP                         | 0.007908 |
| Immunologic signatures | GSE32423_IL7_VS_IL7_IL4_MEMORY_CD8_TCELL_DN                                | 0.007908 |
| Immunologic signatures | GSE360_T_GONDII_VS_B_MALAYI_LOW_DOSE_MAC_UP                                | 0.007908 |
| Immunologic signatures | GSE7460_FOXP3_MUT_VS_WT_ACT_WITH_TGFB_TCONV_UP                             | 0.007908 |
| Immunologic signatures | GSE17721_LPS_VS_GARDIQUIMOD_2H_BMDM_UP                                     | 0.008181 |
| Immunologic signatures | GSE22886_DAY0_VS_DAY1_MONOCYTE_IN_CULTURE_UP                               | 0.008181 |
| Immunologic signatures | GSE22886_NAIVE_CD4_TCELL_VS_MONOCYTE_DN                                    | 0.008181 |
| Immunologic signatures | GSE28237_FOLLICULAR_VS_EARLY_GC_BCELL_DN                                   | 0.008181 |
| All canonical pathways | KEGG_INSULIN_SIGNALING_PATHWAY                                             | 0.0083   |
| Oncogenic signatures   | ESC_V6.5_UP_EARLY.V1_UP                                                    | 0.00854  |
| All canonical pathways | PID_RAC1_PATHWAY                                                           | 0.008667 |
| Immunologic signatures | KAECH_DAY8_EFF_VS_DAY15_EFF_CD8_TCELL_UP                                   | 0.008673 |
| Immunologic signatures | GSE12845_IGD_POS_BLOOD_VS_DARKZONE_GC_TONSIL_BCELL_DN                      | 0.008673 |
| Immunologic signatures | GSE15750_WT_VS_TRAF6KO_DAY10_EFF_CD8_TCELL_UP                              | 0.008673 |
| Immunologic signatures | GSE15930_NAIVE_VS_48H_IN_VITRO_STIM_IFNAB_CD8_TCELL_DN                     | 0.008673 |
| Immunologic signatures | GSE17721_LPS_VS_CPG_12H_BMDM_DN                                            | 0.008673 |
| Immunologic signatures | GSE20366_CD103_KLRG1_DP_VS_DN_TREG_UP                                      | 0.008673 |
| Immunologic signatures | GSE20715_WT_VS_TLR4_KO_6H_OZONE_LUNG_UP                                    | 0.008673 |
| Immunologic signatures | GSE20715_0H_VS_6H_OZONE_LUNG_UP                                            | 0.008673 |
| Immunologic signatures | GSE28237_EARLY_VS_LATE_GC_BCELL_DN                                         | 0.008673 |
| Immunologic signatures | GSE7460_CTRL_VS_TGFB_TREATED_ACT_CD8_TCELL_DN                              | 0.008673 |
| All canonical pathways | PID_IL8CXCR2_PATHWAY                                                       | 0.008891 |
| Immunologic signatures | GSE9650_GP33_VS_GP276_LCMV_SPECIFIC_EXHAUSTED_CD8_TCELL_UP                 | 0.009007 |
| Oncogenic signatures   | CSR_LATE_UP.V1_DN                                                          | 0.009034 |
| Immunologic signatures | GSE13306_RA_VS_UNTREATED_TREG_DN                                           | 0.009251 |
| Immunologic signatures | GSE17721_CPG_VS_GARDIQUIMOD_12H_BMDM_DN                                    | 0.009251 |
| Immunologic signatures | GSE19825_NAIVE_VS_IL2RALOW_DAY3_EFF_CD8_TCELL_DN                           | 0.009251 |
| Immunologic signatures | GSE27786_BCELL_VS_CD4_TCELL_DN                                             | 0.009251 |
| Immunologic signatures | GSE7460_CD8_TCELL_VS_CD4_TCELL_ACT_DN                                      | 0.009251 |
| Immunologic signatures | GSE9037_WT_VS_IRAK4_KO_BMDM_DN                                             | 0.009251 |
| All canonical pathways | REACTOME_SYNTHESIS_OF_BILE_ACIDS_AND_BILE_SALTS_VIA_7ALPHA_HYDROXYCHOLESTE | 0.009452 |
| All canonical pathways | REACTOME_CYCLIN_A_B1_ASSOCIATED_EVENTS_DURING_G2_M_TRANSITION              | 0.009452 |
| Immunologic signatures | GSE1460_INTRATHYMIC_T_PROGENITOR_VS_NAIVE_CD4_TCELL_CORD_BLOOD_DN          | 0.009469 |

|                        |                                                             |          |
|------------------------|-------------------------------------------------------------|----------|
| Immunologic signatures | GSE17721_POLYIC_VS_CPG_6H_BMDM_UP                           | 0.009469 |
| Immunologic signatures | GSE17721_LPS_VS_GARDIQUIMOD_0.5H_BMDM_UP                    | 0.009469 |
| Immunologic signatures | GSE24142_EARLY_THYMIC_PROGENITOR_VS_DN3_THYMOCYTE_ADULT_UP  | 0.009469 |
| Immunologic signatures | GSE27786_CD4_TCELL_VS_NEUTROPHIL_DN                         | 0.009469 |
| Immunologic signatures | GSE30962_PRIMARY_VS_SECONDARY_CHRONIC_LCMV_INF_CD8_TCELL_UP | 0.009469 |
| Immunologic signatures | GSE360_L_MAJOR_VS_B_MALAYI_LOW_DOSE_DC_DN                   | 0.009469 |
| Immunologic signatures | GSE360_L_MAJOR_VS_T_GONDII_MAC_DN                           | 0.009469 |
| Immunologic signatures | GSE9006_1MONTH_VS_4MONTH_POST_TYPE_1_DIABETES_DX_PBMC_UP    | 0.009469 |
| Immunologic signatures | GSE11864_CSF1_PAM3CYS_VS_CSF1_IFNG_PAM3CYS_IN_MAC_UP        | 0.009804 |
| All canonical pathways | KEGG_RETINOL_METABOLISM                                     | 0.009988 |
| All canonical pathways | BIOCARTA_FIBRINOLYSIS_PATHWAY                               | 0.009988 |
| All canonical pathways | BIOCARTA_LECTIN_PATHWAY                                     | 0.009988 |
| All canonical pathways | REACTOME_CELL_CELL_COMMUNICATION                            | 0.009988 |
| All canonical pathways | REACTOME_SIGNALING_BY_PDGF                                  | 0.009988 |
| Oncogenic signatures   | KRAS.600_UP.V1_UP                                           | 0.01001  |
| All canonical pathways | KEGG_STEROID_HORMONE_BIOSYNTHESIS                           | 0.01008  |
| All canonical pathways | REACTOME_GLYCOSAMINOGLYCAN_METABOLISM                       | 0.01008  |
| Immunologic signatures | GSE18791_CTRL_VS_NEWCASTLE_VIRUS_DC_12H_UP                  | 0.01017  |
| Immunologic signatures | GSE25087_TREG_VS_TCONV_ADULT_UP                             | 0.01017  |
| Immunologic signatures | GSE27786_CD8_TCELL_VS_MONO_MAC_DN                           | 0.01017  |
| Immunologic signatures | GSE13306_LAMINA_PROPRIA_VS_SPLEEN_TREG_UP                   | 0.01039  |
| Immunologic signatures | GSE17721_PAM3CSK4_VS_CPG_24H_BMDM_UP                        | 0.01039  |
| Immunologic signatures | GSE17721_POLYIC_VS_CPG_0.5H_BMDM_UP                         | 0.01039  |
| Immunologic signatures | GSE17721_POLYIC_VS_CPG_24H_BMDM_DN                          | 0.01039  |
| Immunologic signatures | GSE26495_NAIVE_VS_PD1LOW_CD8_TCELL_UP                       | 0.01039  |
| Immunologic signatures | GSE29618_MONOCYTE_VS_MDC_DAY7_FLU_VACCINE_UP                | 0.01039  |
| Immunologic signatures | GSE360_T_GONDII_VS_B_MALAYI_HIGH_DOSE_MAC_UP                | 0.01039  |
| Immunologic signatures | GSE7852_LN_VS_FAT_TREG_DN                                   | 0.01039  |
| Immunologic signatures | GSE8678_IL7R_LOW_VS_HIGH_EFF_CD8_TCELL_DN                   | 0.01039  |
| Oncogenic signatures   | WNT_UP.V1_UP                                                | 0.01081  |
| Immunologic signatures | GSE16522_ANTI_CD3CD28_STIM_VS_UNSTIM_NAIVE_CD8_TCELL_DN     | 0.0112   |
| Immunologic signatures | GSE27786_LIN_NEG_VS_NKTCELL_UP                              | 0.0112   |
| Immunologic signatures | GSE29618_PRE_VS_DAY7_POST_TIV_FLU_VACCINE_BCELL_UP          | 0.0112   |

|                        |                                                             |         |
|------------------------|-------------------------------------------------------------|---------|
| All canonical pathways | BIOCARTA_MPR_PATHWAY                                        | 0.01125 |
| All canonical pathways | REACTOME_ACTIVATION_OF_THE_PRE_REPLICATIVE_COMPLEX          | 0.01125 |
| Immunologic signatures | GSE17721_POLYIC_VS_PAM3CSK4_24H_BMDM_DN                     | 0.01157 |
| Immunologic signatures | GSE17721_0.5H_VS_4H_POLYIC_BMDM_UP                          | 0.01157 |
| All canonical pathways | KEGG_GAP_JUNCTION                                           | 0.01189 |
| All canonical pathways | REACTOME_SYNTHESIS_OF_BILE_ACIDS_AND_BILE_SALTS             | 0.01199 |
| All canonical pathways | KEGG_REGULATION_OF_ACTIN_CYTOSKELETON                       | 0.01219 |
| Immunologic signatures | GSE17580_TREG_VS_TEFF_UP                                    | 0.01236 |
| Immunologic signatures | GSE17721_CTRL_VS_LPS_1H_BMDM_DN                             | 0.01236 |
| Immunologic signatures | GSE17721_POLYIC_VS_GARDIQUIMOD_0.5H_BMDM_UP                 | 0.01236 |
| Immunologic signatures | GSE17974_CTRL_VS_ACT_IL4_AND_ANTI_IL12_72H_CD4_TCELL_DN     | 0.01236 |
| Immunologic signatures | GSE18791_CTRL_VS_NEWCASTLE_VIRUS_DC_1H_DN                   | 0.01236 |
| Immunologic signatures | GSE24081_CONTROLLER_VS_PROGRESSOR_HIV_SPECIFIC_CD8_TCELL_UP | 0.01236 |
| Immunologic signatures | GSE2706_LPS_VS_R848_AND_LPS_2H_STIM_DC_UP                   | 0.01236 |
| Immunologic signatures | GSE3982_EFF_MEMORY_CD4_TCELL_VS_TH2_UP                      | 0.01236 |
| Oncogenic signatures   | PRC2_SUZ12_UP.V1_UP                                         | 0.0124  |
| Oncogenic signatures   | CYCLIN_D1_KE.V1_DN                                          | 0.01257 |
| All canonical pathways | KEGG_ENDOCYTOSIS                                            | 0.01269 |
| Oncogenic signatures   | CRX_DN.V1_DN                                                | 0.01269 |
| Immunologic signatures | GSE17721_CTRL_VS_GARDIQUIMOD_6H_BMDM_UP                     | 0.01272 |
| Immunologic signatures | GSE20366_CD103_POS_VS_CD103_KLRG1_DP_TREG_DN                | 0.01272 |
| Immunologic signatures | GSE22886_NEUTROPHIL_VS_MONOCYTE_DN                          | 0.01272 |
| All canonical pathways | KEGG_TIGHT_JUNCTION                                         | 0.01367 |
| Immunologic signatures | GSE11864_CSF1_VS_CSF1_IFNG_PAM3CYS_IN_MAC_UP                | 0.01369 |
| Immunologic signatures | GSE1460_INTRATHYMIC_T_PROGENITOR_VS_CD4_THYMOCYTE_DN        | 0.01369 |
| Immunologic signatures | GSE17721_LPS_VS_PAM3CSK4_16H_BMDM_UP                        | 0.01369 |
| Immunologic signatures | GSE37416_12H_VS_48H_F_TULARENSIS_LVS_NEUTROPHIL_UP          | 0.01369 |
| Immunologic signatures | GSE7852_TREG_VS_TCONV_DN                                    | 0.01369 |
| Immunologic signatures | GSE22045_TREG_VS_TCONV_UP                                   | 0.01372 |
| Immunologic signatures | GSE14769_20MIN_VS_360MIN_LPS_BMDM_DN                        | 0.014   |
| Immunologic signatures | GSE339_EX_VIVO_VS_IN_CULTURE_CD8POS_DC_DN                   | 0.014   |
| Immunologic signatures | GSE3982_NEUTROPHIL_VS_NKCELL_UP                             | 0.014   |
| Immunologic signatures | GSE3982_NEUTROPHIL_VS_TH2_UP                                | 0.014   |

|                        |                                                                 |         |
|------------------------|-----------------------------------------------------------------|---------|
| All canonical pathways | PID_ATR_PATHWAY                                                 | 0.01414 |
| Immunologic signatures | GSE17974_0.5H_VS_72H_IL4_AND_ANTI_IL12_ACT_CD4_TCELL_DN         | 0.01416 |
| All canonical pathways | KEGG_PRIMARY_BILE_ACID_BIOSYNTHESIS                             | 0.0145  |
| Oncogenic signatures   | STK33_NOMO_DN                                                   | 0.01453 |
| Immunologic signatures | GSE16522_MEMORY_VS_NAIVE_CD8_TCELL_UP                           | 0.01466 |
| All canonical pathways | KEGG_LEUKOCYTE_TRANSENDOTHELIAL_MIGRATION                       | 0.01486 |
| Oncogenic signatures   | RAPA_EARLY_UP.V1_DN                                             | 0.01494 |
| Immunologic signatures | GSE17721_LPS_VS_POLYIC_16H_BMDM_UP                              | 0.01494 |
| Immunologic signatures | GSE17721_PAM3CSK4_VS_CPG_6H_BMDM_UP                             | 0.01494 |
| Immunologic signatures | GSE24142_EARLY_THYMIC_PROGENITOR_VS_DN3_THYMOCYTE_ADULT_DN      | 0.01494 |
| Immunologic signatures | GSE24634_TEFF_VS_TCONV_DAY3_IN_CULTURE_DN                       | 0.01494 |
| Immunologic signatures | GSE24634_IL4_VS_CTRL_TREATED_NAIVE_CD4_TCELL_DAY3_UP            | 0.01494 |
| Immunologic signatures | GSE29618_BCELL_VS_PDC_DN                                        | 0.01494 |
| Immunologic signatures | GSE3337_4H_VS_16H_IFNG_IN_CD8POS_DC_DN                          | 0.01494 |
| Immunologic signatures | GSE7460_WT_VS_FOXP3_HET_ACT_TCONV_UP                            | 0.01494 |
| Oncogenic signatures   | CSR_EARLY_UP.V1_UP                                              | 0.01512 |
| Immunologic signatures | GSE17974_CTRL_VS_ACT_IL4_AND_ANTI_IL12_2H_CD4_TCELL_UP          | 0.01565 |
| Oncogenic signatures   | ATF2_S_UP.V1_UP                                                 | 0.01575 |
| Oncogenic signatures   | AKT_UP.V1_UP                                                    | 0.01585 |
| All canonical pathways | KEGG_FC_GAMMA_R_MEDIATED_PHAGOCYTOSIS                           | 0.01606 |
| Immunologic signatures | GSE16522_ANTI_CD3CD28_STIM_VS_UNSTIM_MEMORY_CD8_TCELL_DN        | 0.01608 |
| Immunologic signatures | GSE17974_0.5H_VS_72H_UNTREATED_IN_VITRO_CD4_TCELL_DN            | 0.01608 |
| Immunologic signatures | GSE39820_TGFBETA1_VS_TGFBETA3_IN_IL6_TREATED_CD4_TCELL_DN       | 0.01608 |
| Immunologic signatures | GSE39820_TGFBETA1_VS_TGFBETA3_IN_IL6_IL23A_TREATED_CD4_TCELL_UP | 0.01608 |
| Immunologic signatures | GSE17974_IL4_AND_ANTI_IL12_VS_UNTREATED_1H_ACT_CD4_TCELL_DN     | 0.01617 |
| Immunologic signatures | GSE12845_IGD_NEG_BLOOD_VS_PRE_GC_TONSIL_BCELL_UP                | 0.01638 |
| Immunologic signatures | GSE17721_CTRL_VS_POLYIC_1H_BMDM_UP                              | 0.01638 |
| Immunologic signatures | GSE17721_CTRL_VS_CPG_8H_BMDM_UP                                 | 0.01638 |
| Immunologic signatures | GSE17721_PAM3CSK4_VS_CPG_2H_BMDM_UP                             | 0.01638 |
| Immunologic signatures | GSE22886_TCELL_VS_BCELL_NAIVE_UP                                | 0.01638 |
| Immunologic signatures | GSE360_HIGH_VS_LOW_DOSE_B_MALAYI_MAC_UP                         | 0.01638 |
| All canonical pathways | REACTOME_MRNA_PROCESSING                                        | 0.01642 |
| All canonical pathways | REACTOME_INITIAL_TRIGGERING_OF_COMPLEMENT                       | 0.01664 |



|                        |                                                         |         |
|------------------------|---------------------------------------------------------|---------|
| BioCarta gene sets     | BIOCARTA_COMP_PATHWAY                                   | 0.01746 |
| Immunologic signatures | GSE13229_IMM_VS_MATURE_NKCELL_UP                        | 0.0177  |
| Immunologic signatures | GSE13411_NAIVE_VS_MEMORY_BCELL_DN                       | 0.0177  |
| Immunologic signatures | GSE1432_CTRL_VS_IFNG_6H_MICROGLIA_UP                    | 0.0177  |
| Immunologic signatures | GSE17721_CTRL_VS_CPG_2H_BMDM_UP                         | 0.0177  |
| Immunologic signatures | GSE17721_LPS_VS_GARDIQUIMOD_6H_BMDM_DN                  | 0.0177  |
| Immunologic signatures | GSE17721_ALL_VS_24H_PAM3CSK4_BMDM_DN                    | 0.0177  |
| Immunologic signatures | GSE19825_NAIVE_VS_IL2RAHIGH_DAY3_EFF_CD8_TCELL_UP       | 0.0177  |
| Immunologic signatures | GSE22886_NAIVE_CD4_TCELL_VS_12H_ACT_TH1_UP              | 0.0177  |
| Immunologic signatures | GSE24142_ADULT_VS_FETAL_DN3_THYMOCYTE_DN                | 0.0177  |
| Immunologic signatures | GSE27786_LIN_NEG_VS_ERYTHROBLAST_UP                     | 0.0177  |
| Immunologic signatures | GSE27786_BCELL_VS_ERYTHROBLAST_DN                       | 0.0177  |
| Immunologic signatures | GSE3337_4H_VS_16H_IFNG_IN_CD8POS_DC_UP                  | 0.0177  |
| Immunologic signatures | GSE339_CD4POS_VS_CD8POS_DC_IN_CULTURE_DN                | 0.0177  |
| Immunologic signatures | GSE360_CTRL_VS_L_DONOVANI_DC_DN                         | 0.0177  |
| Immunologic signatures | GSE360_CTRL_VS_B_MALAYI_HIGH_DOSE_DC_DN                 | 0.0177  |
| Immunologic signatures | GSE360_DC_VS_MAC_L_MAJOR_UP                             | 0.0177  |
| Immunologic signatures | GSE3982_MAST_CELL_VS_NKCELL_DN                          | 0.0177  |
| Immunologic signatures | GSE3982_MAC_VS_TH1_DN                                   | 0.0177  |
| Immunologic signatures | GSE3982_NEUTROPHIL_VS_NKCELL_DN                         | 0.0177  |
| Immunologic signatures | GSE7460_CTRL_VS_TGFB_TREATED_ACT_TCONV_UP               | 0.0177  |
| All canonical pathways | REACTOME_G_BETA_GAMMA_SIGNALLING_THROUGH_PLC_BETA       | 0.01798 |
| Immunologic signatures | GSE6269_E_COLI_VS_STREP_PNEUMO_INF_PBMC_DN              | 0.01806 |
| All canonical pathways | REACTOME_PYRUVATE_METABOLISM_AND_CITRIC_ACID_TCA_CYCLE  | 0.0181  |
| All canonical pathways | REACTOME_CELL_JUNCTION_ORGANIZATION                     | 0.01815 |
| Immunologic signatures | GSE13485_CTRL_VS_DAY1_YF17D_VACCINE_PBMC_UP             | 0.01864 |
| Immunologic signatures | GSE1460_CD4_THYMOCYTE_VS_NAIVE_CD4_TCELL_ADULT_BLOOD_UP | 0.01887 |
| Immunologic signatures | GSE14769_40MIN_VS_360MIN_LPS_BMDM_UP                    | 0.01887 |
| Immunologic signatures | GSE17721_CTRL_VS_CPG_0.5H_BMDM_DN                       | 0.01887 |
| Immunologic signatures | GSE17721_LPS_VS_POLYIC_16H_BMDM_DN                      | 0.01887 |
| Immunologic signatures | GSE17721_POLYIC_VS_CPG_12H_BMDM_UP                      | 0.01887 |
| Immunologic signatures | GSE17721_LPS_VS_GARDIQUIMOD_0.5H_BMDM_DN                | 0.01887 |
| Immunologic signatures | GSE360_CTRL_VS_M_TUBERCULOSIS_MAC_UP                    | 0.01887 |

|                        |                                                       |         |
|------------------------|-------------------------------------------------------|---------|
| Immunologic signatures | GSE36476_CTRL_VS_TSST_ACT_16H_MEMORY_CD4_TCELL_OLD_UP | 0.01887 |
| Immunologic signatures | GSE39820_CTRL_VS_TGFBETA3_IL6_IL23A_CD4_TCELL_DN      | 0.01887 |
| Immunologic signatures | GSE7460_FOXP3_MUT_VS_WT_ACT_TCONV_UP                  | 0.01887 |
| Immunologic signatures | GSE17721_CTRL_VS_PAM3CSK4_0.5H_BMDM_UP                | 0.01918 |
| Immunologic signatures | GSE17721_12H_VS_24H_LPS_BMDM_UP                       | 0.01918 |
| Immunologic signatures | GSE20715_WT_VS_TLR4_KO_LUNG_UP                        | 0.01918 |
| Immunologic signatures | GSE339_CD4POS_VS_CD4CD8DN_DC_IN_CULTURE_DN            | 0.01918 |
| Immunologic signatures | GSE3982_MAST_CELL_VS_TH2_DN                           | 0.01918 |
| Immunologic signatures | GSE3982_NEUTROPHIL_VS_EFF_MEMORY_CD4_TCELL_UP         | 0.01918 |
| Oncogenic signatures   | CAMP_UP.V1_UP                                         | 0.0194  |
| Oncogenic signatures   | RB_P107_DN.V1_DN                                      | 0.0196  |
| Immunologic signatures | GSE17974_0H_VS_4H_IN_VITRO_ACT_CD4_TCELL_UP           | 0.01968 |
| All canonical pathways | REACTOME_KINESINS                                     | 0.01978 |
| All canonical pathways | BIOCARTA_RHO_PATHWAY                                  | 0.01989 |
| All canonical pathways | PID_SYNDECAN_4_PATHWAY                                | 0.01989 |
| All canonical pathways | REACTOME_G_PROTEIN_BETA_GAMMA_SIGNALLING              | 0.01999 |
| Oncogenic signatures   | KRAS.600.LUNG.BREAST_UP.V1_UP                         | 0.02029 |
| Oncogenic signatures   | CORDENONSI_YAP_CONSERVED_SIGNATURE                    | 0.02039 |
| All canonical pathways | PID_TAP63PATHWAY                                      | 0.02049 |
| Immunologic signatures | GSE13229_IMM_VS_MATURE_NKCELL_DN                      | 0.02058 |
| Immunologic signatures | GSE14308_NAIVE_CD4_TCELL_VS_NATURAL_TREG_DN           | 0.02058 |
| Immunologic signatures | GSE17721_CTRL_VS_PAM3CSK4_24H_BMDM_DN                 | 0.02058 |
| Immunologic signatures | GSE17721_POLYIC_VS_GARDIQUIMOD_2H_BMDM_DN             | 0.02058 |
| Immunologic signatures | GSE24634_IL4_VS_CTRL_TREATED_NAIVE_CD4_TCELL_DAY7_DN  | 0.02058 |
| Immunologic signatures | GSE32423_IL7_VS_IL7_IL4_MEMORY_CD8_TCELL_UP           | 0.02058 |
| Immunologic signatures | GSE32423_IL7_VS_IL7_IL4_NAIVE_CD8_TCELL_UP            | 0.02058 |
| Immunologic signatures | GSE6269_HEALTHY_VS_STREP_AUREUS_INF_PBMC_DN           | 0.02058 |
| Immunologic signatures | GSE1432_CTRL_VS_IFNG_24H_MICROGLIA_UP                 | 0.02093 |
| Immunologic signatures | GSE22886_NAIVE_TCELL_VS_MONOCYTE_DN                   | 0.02093 |
| Immunologic signatures | GSE29617_DAY3_VS_DAY7_TIV_FLU_VACCINE_PBMC_2008_DN    | 0.02093 |
| Immunologic signatures | GSE360_LOW_DOSE_B_MALAYI_VS_M_TUBERCULOSIS_MAC_UP     | 0.02093 |
| Immunologic signatures | GSE7460_CTRL_VS_TGFB_TREATED_ACT_CD8_TCELL_UP         | 0.02093 |
| Immunologic signatures | GSE6269_HEALTHY_VS_FLU_INF_PBMC_DN                    | 0.02096 |

|                        |                                                               |         |
|------------------------|---------------------------------------------------------------|---------|
| Immunologic signatures | GSE22045_TREG_VS_TCONV_DN                                     | 0.02154 |
| Immunologic signatures | GSE22886_CD8_VS_CD4_NAIVE_TCELL_DN                            | 0.02212 |
| Oncogenic signatures   | WNT_UP.V1_DN                                                  | 0.02223 |
| Oncogenic signatures   | CAHOY_ASTROCYTIC                                              | 0.02223 |
| All canonical pathways | REACTOME_G1_S_SPECIFIC_TRANSCRIPTION                          | 0.02228 |
| All canonical pathways | REACTOME_CLASS_I_MHC_MEDIATED_ANTIGEN_PROCESSING_PRESENTATION | 0.02237 |
| Immunologic signatures | GSE11057_CD4_EFF_MEM_VS_PBMC_DN                               | 0.02243 |
| Immunologic signatures | GSE11924_TFH_VS_TH2_CD4_TCELL_DN                              | 0.02243 |
| Immunologic signatures | GSE13306_TREG_RA_VS_TCONV_RA_DN                               | 0.02243 |
| Immunologic signatures | GSE17721_LPS_VS_POLYIC_6H_BMDM_UP                             | 0.02243 |
| Immunologic signatures | GSE339_EX_VIVO_VS_IN_CULTURE_CD4CD8DN_DC_DN                   | 0.02243 |
| Immunologic signatures | GSE360_L_DONOVANI_VS_L_MAJOR_MAC_UP                           | 0.02243 |
| Immunologic signatures | GSE36392_TYPE_2_MYELOID_VS_MAC_IL25_TREATED_LUNG_UP           | 0.02243 |
| All canonical pathways | PID_ER_NONGENOMIC_PATHWAY                                     | 0.02254 |
| Immunologic signatures | GSE17721_CTRL_VS_POLYIC_0.5H_BMDM_DN                          | 0.02289 |
| Immunologic signatures | GSE29614_DAY3_VS_DAY7_TIV_FLU_VACCINE_PBMC_UP                 | 0.02305 |
| Immunologic signatures | GSE22886_IGG_IGA_MEMORY_BCELL_VS_BM_PLASMA_CELL_DN            | 0.02428 |
| Immunologic signatures | GSE29618_PRE_VS_DAY7_POST_TIV_FLU_VACCINE_BCELL_DN            | 0.02428 |
| Immunologic signatures | GSE11924_TH1_VS_TH2_CD4_TCELL_UP                              | 0.02453 |
| Immunologic signatures | GSE14350_IL2RB_KO_VS_WT_TREG_UP                               | 0.02453 |
| Immunologic signatures | GSE20715_WT_VS_TLR4_KO_48H_OZONE_LUNG_DN                      | 0.02453 |
| Immunologic signatures | GSE29618_PDC_VS_MDC_DAY7_FLU_VACCINE_UP                       | 0.02453 |
| Immunologic signatures | GSE29618_PRE_VS_DAY7_POST_LAIV_FLU_VACCINE_PDC_DN             | 0.02453 |
| Immunologic signatures | GSE360_L_MAJOR_VS_T_GONDII_DC_UP                              | 0.02453 |
| Immunologic signatures | GSE39820_CTRL_VS_TGFBETA1_IL6_IL23A_CD4_TCELL_DN              | 0.02453 |
| Immunologic signatures | GSE7852_LN_VS_THYMUS_TCONV_UP                                 | 0.02453 |
| All canonical pathways | PID_E2F_PATHWAY                                               | 0.02474 |
| All canonical pathways | REACTOME_REGULATION_OF_INSULIN_SECRETION                      | 0.02476 |
| Immunologic signatures | GSE29617_DAY3_VS_DAY7_TIV_FLU_VACCINE_PBMC_2008_UP            | 0.02539 |
| All canonical pathways | REACTOME_ADP_SIGNALLING_THROUGH_P2RY12                        | 0.02547 |
| All canonical pathways | BIOCARTA_CLASSIC_PATHWAY                                      | 0.02588 |
| All canonical pathways | PID_INTEGRIN2_PATHWAY                                         | 0.02588 |
| All canonical pathways | REACTOME_COMMON_PATHWAY                                       | 0.02588 |

|                        |                                                                      |         |
|------------------------|----------------------------------------------------------------------|---------|
| All canonical pathways | REACTOME_MITOCHONDRIAL_FATTY_ACID_BETA_OXIDATION                     | 0.02588 |
| All canonical pathways | REACTOME_INHIBITION_OF_INSULIN_SECRETION_BY_ADRENALINE_NORADRENALINE | 0.02588 |
| All canonical pathways | REACTOME_E2F_MEDIATED_REGULATION_OF_DNA_REPLICATION                  | 0.02588 |
| Immunologic signatures | GSE11864_UNTREATED_VS_CSF1_PAM3CYS_IN_MAC_UP                         | 0.026   |
| Immunologic signatures | GSE17974_0H_VS_1H_IN_VITRO_ACT_CD4_TCELL_DN                          | 0.026   |
| Immunologic signatures | GSE24102_GRANULOCYSTIC_MDSC_VS_NEUTROPHIL_UP                         | 0.0265  |
| Immunologic signatures | GSE3982_BCELL_VS_BASOPHIL_UP                                         | 0.0265  |
| Immunologic signatures | GSE7460_TREG_VS_TCONV_ACT_DN                                         | 0.0265  |
| Immunologic signatures | GSE37416_CTRL_VS_0H_F_TULARENSIS_LVS_NEUTROPHIL_DN                   | 0.02651 |
| All canonical pathways | PID_LYSOPHOSPHOLIPID_PATHWAY                                         | 0.0266  |
| Immunologic signatures | GSE10239_NAIVE_VS_KLRG1HIGH_EFF_CD8_TCELL_UP                         | 0.02664 |
| Immunologic signatures | GSE10239_MEMORY_VS_DAY4.5_EFF_CD8_TCELL_DN                           | 0.02664 |
| Immunologic signatures | GSE17580_UNINFECTED_VS_S_MANSONI_INF_TREG_DN                         | 0.02664 |
| Immunologic signatures | GSE17721_CTRL_VS_GARDIQUIMOD_12H_BMDM_UP                             | 0.02664 |
| Immunologic signatures | GSE17721_PAM3CSK4_VS_CPG_2H_BMDM_DN                                  | 0.02664 |
| Immunologic signatures | GSE17721_PAM3CSK4_VS_GADIQUIMOD_0.5H_BMDM_UP                         | 0.02664 |
| Immunologic signatures | GSE27786_NKTCELL_VS_MONO_MAC_UP                                      | 0.02664 |
| Immunologic signatures | GSE30083_SP3_VS_SP4_THYMOCYTE_DN                                     | 0.02664 |
| Immunologic signatures | GSE9650_NAIVE_VS_EXHAUSTED_CD8_TCELL_UP                              | 0.02664 |
| Immunologic signatures | GSE14350_IL2RB_KO_VS_WT_TREG_DN                                      | 0.02704 |
| Immunologic signatures | GSE30083_SP2_VS_SP3_THYMOCYTE_UP                                     | 0.02704 |
| All canonical pathways | KEGG_DRUG_METABOLISM_OTHER_ENZYMES                                   | 0.0272  |
| All canonical pathways | REACTOME_SYNTHESIS_OF_DNA                                            | 0.02726 |
| Immunologic signatures | GSE10856_CTRL_VS_TNFRSF6B_IN_MACROPHAGE_UP                           | 0.02828 |
| Immunologic signatures | GSE11864_CSF1_IFNG_VS_CSF1_PAM3CYS_IN_MAC_DN                         | 0.02828 |
| Immunologic signatures | GSE17721_0.5H_VS_8H_LPS_BMDM_UP                                      | 0.02885 |
| Immunologic signatures | GSE15930_STIM_VS_STIM_AND_TRICHOSTATINA_72H_CD8_T_CELL_DN            | 0.029   |
| Immunologic signatures | GSE16522_ANTI_CD3CD28_STIM_VS_UNSTIM_MEMORY_CD8_TCELL_UP             | 0.029   |
| Immunologic signatures | GSE17721_LPS_VS_PAM3CSK4_12H_BMDM_DN                                 | 0.029   |
| Immunologic signatures | GSE17721_LPS_VS_GARDIQUIMOD_8H_BMDM_UP                               | 0.029   |
| Immunologic signatures | GSE26669_CD4_VS_CD8_TCELL_IN_MLR_UP                                  | 0.029   |
| Immunologic signatures | GSE360_T_GONDII_VS_M_TUBERCULOSIS_DC_UP                              | 0.029   |
| Immunologic signatures | GSE3982_EOSINOPHIL_VS_DC_DN                                          | 0.029   |

|                        |                                                                           |         |
|------------------------|---------------------------------------------------------------------------|---------|
| Immunologic signatures | GSE5960_TH1_VS_ANERGIC_TH1_DN                                             | 0.029   |
| Immunologic signatures | GSE9650_EXHAUSTED_VS_MEMORY_CD8_TCELL_DN                                  | 0.029   |
| BioCarta gene sets     | BIOCARTA_FIBRINOLYSIS_PATHWAY                                             | 0.02909 |
| BioCarta gene sets     | BIOCARTA_MPR_PATHWAY                                                      | 0.02909 |
| BioCarta gene sets     | BIOCARTA_LLECTIN_PATHWAY                                                  | 0.02909 |
| All canonical pathways | REACTOME_UNWINDING_OF_DNA                                                 | 0.02975 |
| All canonical pathways | REACTOME_CREATION_OF_C4_AND_C2_ACTIVATORS                                 | 0.03007 |
| All canonical pathways | REACTOME_CHONDROITIN_SULFATE_DERMATAN_SULFATE_METABOLISM                  | 0.03059 |
| Oncogenic signatures   | RB_P130_DN.V1_UP                                                          | 0.03069 |
| All canonical pathways | KEGG_PYRIMIDINE_METABOLISM                                                | 0.03081 |
| Immunologic signatures | GSE14308_TH1_VS_INDUCED_TREG_DN                                           | 0.03133 |
| Immunologic signatures | GSE1460_CD4_THYMOCYTE_VS_THYMIC_STROMAL_CELL_DN                           | 0.03133 |
| Immunologic signatures | GSE29618_PRE_VS_DAY7_POST_TIV_FLU_VACCINE_PDC_UP                          | 0.03133 |
| Immunologic signatures | GSE32423_CTRL_VS_IL7_MEMORY_CD8_TCELL_DN                                  | 0.03133 |
| Immunologic signatures | GSE360_CTRL_VS_B_MALAYI_HIGH_DOSE_DC_UP                                   | 0.03133 |
| Immunologic signatures | GSE3982_MAST_CELL_VS_TH1_UP                                               | 0.03133 |
| Immunologic signatures | GSE3982_MAC_VS_NEUTROPHIL_UP                                              | 0.03133 |
| All canonical pathways | BIOCARTA_MCM_PATHWAY                                                      | 0.03143 |
| All canonical pathways | KEGG_AXON_GUIDANCE                                                        | 0.03146 |
| All canonical pathways | REACTOME_DIABETES_PATHWAYS                                                | 0.03146 |
| Immunologic signatures | GSE1460_DP_THYMOCYTE_VS_NAIVE_CD4_TCELL_ADULT_BLOOD_UP                    | 0.03167 |
| Immunologic signatures | GSE17721_CPG_VS_GARDIQUIMOD_6H_BMDM_DN                                    | 0.03167 |
| Immunologic signatures | GSE17721_PAM3CSK4_VS_GADIQUIMOD_4H_BMDM_DN                                | 0.03167 |
| Immunologic signatures | GSE17721_PAM3CSK4_VS_GADIQUIMOD_16H_BMDM_UP                               | 0.03167 |
| Immunologic signatures | GSE13485_DAY3_VS_DAY7_YF17D_VACCINE_PBMC_UP                               | 0.03252 |
| All canonical pathways | KEGG_BETA_ALANINE_METABOLISM                                              | 0.03314 |
| All canonical pathways | PID_CXCR4_PATHWAY                                                         | 0.03314 |
| All canonical pathways | PID_THROMBIN_PAR1_PATHWAY                                                 | 0.03314 |
| All canonical pathways | REACTOME_TRANSMISSION_ACROSS_CHEMICAL_SYNAPSES                            | 0.03314 |
| All canonical pathways | REACTOME_REGULATION_OF_WATER_BALANCE_BY_RENAL_AQUAPORINS                  | 0.03314 |
| Immunologic signatures | GSE26928_EFF_MEMORY_VS_CXCR5_POS_CD4_TCELL_DN                             | 0.03323 |
| All canonical pathways | REACTOME_ASSOCIATION_OF_TRIC_CCT_WITH_TARGET_PROTEINS_DURING_BIOSYNTHESIS | 0.0336  |
| Immunologic signatures | GSE17721_CTRL_VS_PAM3CSK4_6H_BMDM_DN                                      | 0.03435 |

|                        |                                                              |         |
|------------------------|--------------------------------------------------------------|---------|
| Immunologic signatures | GSE17721_12H_VS_24H_GARDIQUIMOD_BMDM_DN                      | 0.03435 |
| Immunologic signatures | GSE8515_CTRL_VS_IL1_4H_STIM_MAC_DN                           | 0.03435 |
| Immunologic signatures | GSE20715_0H_VS_48H_OZONE_LUNG_UP                             | 0.0346  |
| Immunologic signatures | GSE360_CTRL_VS_B_MALAYI_LOW_DOSE_MAC_DN                      | 0.0346  |
| Immunologic signatures | GSE36392_TYPE_2_MYELOID_VS_NEUTROPHIL_IL25_TREATED_LUNG_UP   | 0.0346  |
| Immunologic signatures | GSE9006_HEALTHY_VS_TYPE_1_DIABETES_PBMIC_4MONTH_POST_DX_UP   | 0.0346  |
| Immunologic signatures | GSE9037_WT_VS_IRAK4_KO_LPS_4H_STIM_BMDM_UP                   | 0.0346  |
| All canonical pathways | KEGG_MAPK_SIGNALING_PATHWAY                                  | 0.03497 |
| All canonical pathways | KEGG_DRUG_METABOLISM_CYTOCHROME_P450                         | 0.03575 |
| All canonical pathways | KEGG_P53_SIGNALING_PATHWAY                                   | 0.03575 |
| All canonical pathways | ST_INTEGRIN_SIGNALING_PATHWAY                                | 0.03575 |
| Immunologic signatures | GSE31082_DN_VS_CD4_SP_THYMOCYTE_UP                           | 0.0372  |
| Immunologic signatures | GSE1460_DP_VS_CD4_THYMOCYTE_UP                               | 0.0375  |
| Immunologic signatures | GSE15767_MED_VS_SCS_MAC_LN_DN                                | 0.0375  |
| Immunologic signatures | GSE17721_LPS_VS_POLYIC_2H_BMDM_DN                            | 0.0375  |
| Immunologic signatures | GSE26495_NAIVE_VS_PD1HIGH_CD8_TCELL_DN                       | 0.0375  |
| Immunologic signatures | GSE39820_CTRL_VS_TGFBETA3_IL6_CD4_TCELL_DN                   | 0.0375  |
| Oncogenic signatures   | P53_DN.V1_DN                                                 | 0.03769 |
| Oncogenic signatures   | CAHOY_OLIGODENDROCYTIC                                       | 0.03769 |
| Oncogenic signatures   | KRAS.PROSTATE_UP.V1_UP                                       | 0.03769 |
| Immunologic signatures | GSE32423_CTRL_VS_IL7_IL4_MEMORY_CD8_TCELL_UP                 | 0.03787 |
| Immunologic signatures | GSE39820_CTRL_VS_IL1B_IL6_IL23A_CD4_TCELL_UP                 | 0.03787 |
| All canonical pathways | SA_MMP_CYTOKINE_CONNECTION                                   | 0.03849 |
| All canonical pathways | SIG_REGULATION_OF_THE_ACTIN_CYTOSKELETON_BY_RHO_GTPASES      | 0.03973 |
| Immunologic signatures | GSE12366_PLASMA_CELL_VS_NAIVE_BCELL_UP                       | 0.04017 |
| Immunologic signatures | GSE1460_DP_THYMOCYTE_VS_NAIVE_CD4_TCELL_ADULT_BLOOD_DN       | 0.04061 |
| Immunologic signatures | GSE1460_NAIVE_CD4_TCELL_CORD_BLOOD_VS_THYMIC_STROMAL_CELL_DN | 0.04061 |
| Immunologic signatures | GSE15324_NAIVE_VS_ACTIVATED_ELF4_KO_CD8_TCELL_DN             | 0.04061 |
| Immunologic signatures | GSE15930_STIM_VS_STIM_AND_IFNAB_72H_CD8_T_CELL_DN            | 0.04061 |
| Immunologic signatures | GSE17721_CTRL_VS_LPS_4H_BMDM_UP                              | 0.04061 |
| Immunologic signatures | GSE17721_POLYIC_VS_PAM3CSK4_8H_BMDM_UP                       | 0.04061 |
| Immunologic signatures | GSE22886_NAIVE_CD4_TCELL_VS_MEMORY_TCELL_DN                  | 0.04061 |
| Immunologic signatures | GSE29618_BCELL_VS_PDC_DAY7_FLU_VACCINE_DN                    | 0.04061 |

|                        |                                                            |         |
|------------------------|------------------------------------------------------------|---------|
| Immunologic signatures | GSE29618_PRE_VS_DAY7_FLU_VACCINE_BCELL_DN                  | 0.04061 |
| Immunologic signatures | GSE32423_MEMORY_VS_NAIVE_CD8_TCELL_IL7_DN                  | 0.04061 |
| Immunologic signatures | GSE32423_CTRL_VS_IL7_IL4_MEMORY_CD8_TCELL_DN               | 0.04061 |
| Immunologic signatures | GSE360_L_DONOVANI_VS_L_MAJOR_DC_DN                         | 0.04061 |
| Immunologic signatures | GSE360_HIGH_DOSE_B_MALAYI_VS_M_TUBERCULOSIS_MAC_DN         | 0.04061 |
| Immunologic signatures | GSE360_CTRL_VS_M_TUBERCULOSIS_DC_DN                        | 0.04094 |
| Immunologic signatures | GSE360_HIGH_DOSE_B_MALAYI_VS_M_TUBERCULOSIS_DC_UP          | 0.04094 |
| All canonical pathways | KEGG_HYPERTROPHIC_CARDIOMYOPATHY_HCM                       | 0.04182 |
| All canonical pathways | PID_P73PATHWAY                                             | 0.04215 |
| All canonical pathways | REACTOME_GPVI_MEDIATED_ACTIVATION_CASCADE                  | 0.04267 |
| Immunologic signatures | GSE17974_0H_VS_6H_IN_VITRO_ACT_CD4_TCELL_UP                | 0.0429  |
| Immunologic signatures | GSE17721_CTRL_VS_LPS_12H_BMDM_DN                           | 0.04381 |
| Immunologic signatures | GSE17721_CTRL_VS_PAM3CSK4_24H_BMDM_UP                      | 0.04381 |
| Immunologic signatures | GSE17721_POLYIC_VS_PAM3CSK4_16H_BMDM_UP                    | 0.04381 |
| Immunologic signatures | GSE17721_PAM3CSK4_VS_CPG_24H_BMDM_DN                       | 0.04381 |
| Immunologic signatures | GSE17721_12H_VS_24H_PAM3CSK4_BMDM_DN                       | 0.04381 |
| Immunologic signatures | GSE17721_0.5H_VS_4H_GARDIQUIMOD_BMDM_UP                    | 0.04381 |
| Immunologic signatures | GSE22886_NAIVE_CD4_TCELL_VS_DC_UP                          | 0.04381 |
| Immunologic signatures | GSE24142_EARLY_THYMIC_PROGENITOR_VS_DN2_THYMOCYTE_FETAL_UP | 0.04381 |
| Immunologic signatures | GSE27786_CD8_TCELL_VS_ERYTHROBLAST_DN                      | 0.04381 |
| Immunologic signatures | GSE27786_ERYTHROBLAST_VS_MONO_MAC_UP                       | 0.04381 |
| Immunologic signatures | GSE29618_PRE_VS_DAY7_POST_LAIV_FLU_VACCINE_MONOCYTE_DN     | 0.04381 |
| Immunologic signatures | GSE339_CD4POS_VS_CD8POS_DC_IN_CULTURE_UP                   | 0.04381 |
| Immunologic signatures | GSE37416_CTRL_VS_3H_F_TULARENSIS_LVS_NEUTROPHIL_UP         | 0.04381 |
| Immunologic signatures | GSE3982_BCELL_VS_NKCELL_DN                                 | 0.04381 |
| Immunologic signatures | GSE7852_TREG_VS_TCONV_UP                                   | 0.04381 |
| All canonical pathways | REACTOME_CITRIC_ACID_CYCLE_TCA_CYCLE                       | 0.04382 |
| Oncogenic signatures   | AKT_UP_MTOR_DN.V1_DN                                       | 0.04397 |
| Oncogenic signatures   | ESC_V6.5_UP_LATE.V1_DN                                     | 0.04397 |
| All canonical pathways | PID_IL8CXCR1_PATHWAY                                       | 0.04419 |
| All canonical pathways | REACTOME_BILE_ACID_AND_BILE_SALT_METABOLISM                | 0.04419 |
| All canonical pathways | REACTOME_G_PROTEIN_ACTIVATION                              | 0.04419 |
| Oncogenic signatures   | CAMP_UP.V1_DN                                              | 0.04423 |

|                        |                                                           |         |
|------------------------|-----------------------------------------------------------|---------|
| Oncogenic signatures   | NRL_DN.V1_UP                                              | 0.04539 |
| All canonical pathways | KEGG_PATHWAYS_IN_CANCER                                   | 0.04565 |
| Immunologic signatures | GSE6269_FLU_VS_STREP_PNEUMO_INF_PBMC_DN                   | 0.04583 |
| Oncogenic signatures   | ESC_J1_UP_EARLY.V1_DN                                     | 0.04629 |
| Immunologic signatures | GSE12845_IGD_POS_BLOOD_VS_NAIVE_TONSIL_BCELL_DN           | 0.04711 |
| Immunologic signatures | GSE14308_TH2_VS_TH17_DN                                   | 0.04711 |
| Immunologic signatures | GSE1460_DP_THYMOCYTE_VS_THYMIC_STROMAL_CELL_DN            | 0.04711 |
| Immunologic signatures | GSE17721_CTRL_VS_POLYIC_0.5H_BMDM_UP                      | 0.04711 |
| Immunologic signatures | GSE17721_CTRL_VS_PAM3CSK4_2H_BMDM_DN                      | 0.04711 |
| Immunologic signatures | GSE17974_CTRL_VS_ACT_IL4_AND_ANTI_IL12_48H_CD4_TCELL_DN   | 0.04711 |
| Immunologic signatures | GSE22886_UNSTIM_VS_STIM_MEMORY_TCELL_UP                   | 0.04711 |
| Immunologic signatures | GSE29618_PRE_VS_DAY7_FLU_VACCINE_MDC_DN                   | 0.04711 |
| Immunologic signatures | GSE30083_SP2_VS_SP4_THYMOCYTE_UP                          | 0.04711 |
| Immunologic signatures | GSE32423_MEMORY_VS_NAIVE_CD8_TCELL_UP                     | 0.04711 |
| Immunologic signatures | GSE360_DC_VS_MAC_L_MAJOR_DN                               | 0.04711 |
| Immunologic signatures | GSE36392_MAC_VS_NEUTROPHIL_IL25_TREATED_LUNG_DN           | 0.04711 |
| Immunologic signatures | GSE3982_DC_VS_TH2_DN                                      | 0.04711 |
| Immunologic signatures | GSE7460_CTRL_VS_TGFB_TREATED_ACT_TREG_UP                  | 0.04711 |
| Immunologic signatures | GSE7460_CD8_TCELL_VS_TREG_ACT_UP                          | 0.04711 |
| Immunologic signatures | GSE7460_CTRL_VS_TGFB_TREATED_ACT_FOXP3_HET_TCONV_DN       | 0.04711 |
| Immunologic signatures | GSE7460_WT_VS_FOXP3_HET_ACT_WITH_TGFB_TCONV_DN            | 0.04711 |
| Immunologic signatures | GSE7852_LN_VS_THYMUS_TREG_DN                              | 0.04711 |
| Immunologic signatures | GSE9006_HEALTHY_VS_TYPE_1_DIABETES_PBMC_1MONTH_POST_DX_UP | 0.04711 |
| All canonical pathways | REACTOME_INSULIN_RECEPTOR_SIGNALLING_CASCADE              | 0.04735 |
| All canonical pathways | REACTOME_INTEGRIN_CELL_SURFACE_INTERACTIONS               | 0.04804 |
| Immunologic signatures | GSE26495_PD1HIGH_VS_PD1LOW_CD8_TCELL_DN                   | 0.04872 |
| BioCarta gene sets     | BIOCARTA_RHO_PATHWAY                                      | 0.04969 |
